# Supplementary material for: Photo-induced defluorination acyl fluoride exchange as a fluorogenic photo-click reaction for photo-affinity labeling
Source: Royal Society of Chemistry journal article supplement (doi:10.1039/d2sc04636a), 2023-01-01

# Photo-induced Defluorination Acyl Fluoride Exchange as a Fluorogenic Photo-click Reaction for Photo-affinity labeling

Lijun Deng, Cefei Zhang, Baolin Li, Jielin Fu, Zhong Zhang, Sitong Li, Xiaohu Zhao, Zhishan Su, Changwei Hu\* and Zhipeng Yu\*

Key Laboratory of Green Chemistry & Technology of Ministry of Education, College of Chemistry, Sichuan University, 29 Wangjiang Road, Chengdu 610064, P. R. China.

|                                                                           |     |
|---------------------------------------------------------------------------|-----|
| 1. General Information.....                                               | 1   |
| 2. Supplemental figures and tables .....                                  | 3   |
| 3. HPLC-MS analysis and Preparation & Characterizations of products ..... | 35  |
| 4. Peptide cyclization and modification.....                              | 85  |
| 5. Methods .....                                                          | 110 |
| 6. Synthesis procedures and compounds characterization .....              | 116 |
| 7. Computational details .....                                            | 135 |
| 8. Supplementary reference .....                                          | 147 |
| 9. NMR spectra.....                                                       | 148 |

## 1. General information

### 1.1 General information for chemical synthesis

Unless otherwise indicated, all solvents and starting materials were purchased from commercial sources and used directly without further purification. Flash column chromatography was performed by using 200-300 mesh silica gel. Anhydrous solvents, purchased from Acros Organics (dioxane, DMF, and THF), commercially available chemicals were obtained from Adamas, Acros Organics, Aldrich Chemical Co., Alfa, Aesar and TCI. The  $^1\text{H}$ ,  $^{13}\text{C}$  and  $^{19}\text{F}$  NMR spectra were recorded on a Brüker Avance 400 or 600 or 800 spectrometer ( $^1\text{H}$ : 400 or 600 or 800 MHz,  $^{13}\text{C}$ : 101 or 150 or 201 MHz,  $^{19}\text{F}$ : 376 MHz). Chemical shifts ( $\delta$ ) for  $^1\text{H}$  and  $^{13}\text{C}$  NMR spectra are given in ppm relative to TMS. The residue solvent signals were used as references for  $^1\text{H}$  and  $^{13}\text{C}$  NMR spectra and the chemical shifts converted to the TMS scale ( $\text{CDCl}_3$ , 7.26 ppm for  $^1\text{H}$  NMR and 77.16 ppm for  $^{13}\text{C}$  NMR;  $\text{CD}_3\text{CN}$ , 1.94 ppm for  $^1\text{H}$  NMR;  $\text{CF}_3\text{COOD}$ , 11.50 ppm for  $^1\text{H}$  NMR and 164.2 ppm, 116.6 ppm for  $^{13}\text{C}$  NMR;  $\text{DMSO-}d_6$ , 2.50 ppm for  $^1\text{H}$  NMR and 39.5 ppm for  $^{13}\text{C}$  NMR). Shifts multiplicity was reported as follows: s = singlet, d = doublet, t = triplet, q = quartet, m = multiplet, brs. = broad.

Abbreviations used:  $\text{Et}_3\text{N}$  = triethylamine; EtOAc = ethyl acetate; PE = petroleum ether; DMF = dimethylformamide; THF = tetrahydrofuran; TLC = thin layer chromatography; HPLC = High Performance Liquid Chromatography; ACN = Acetonitrile; ABC = ammonium bicarbonate; PBS = phosphate buffer solution; FA = formic acid; DTT = dithiothreitol; IAA = Iodoacetamide; TFA = trifluoroacetic acid.

### 1.2 General information–spectra acquisition

UV-Vis absorption spectra were recorded by using 1.0 cm quartz cuvettes on a Thermo NANODROP 2000C Spectrophotometer. Exact ESI mass spectra were recorded on a SHIMADZU LCMS-IT-TOF, flow rate = 1.0 mL /min. LC-ESI-MS were obtained on a Thermo LTQ-XL mass spectrometer.

The cell imaging experiments were carried out on an Olympus IX83 living cell fluorescence microscope. The cells were stained with a commercially available NucBlue™ Live Ready Probe™ Reagent for cell nucleus fluorescent imaging and identification.

The kinetic data for the amidation reaction between benzoyl fluoride (**5c**) and benzylamine (**2a**) were recorded in real-time by a HORIBA Fluoromax-4 Spectrofluorometer Detector, and deuterium arc & halide lamps were used as the light source (Purchased from Shanghai Wenyi Photoelectric Technology Co., Ltd. China). The absorbance data of photo-switching kinetic and photo-antifatigue performance were recorded on an in-house assembled instrument based on a fast-response modular spectrometer.

### 1.3 General information–light sources

A 311 nm UV lamp (2.9 mW  $\text{cm}^{-2}$ , single wavelength output after an optical filter) for the determination of photo-quantum yields and UV-Vis spectra.

A 311 nm UV lamp (5.9 mW  $\text{cm}^{-2}$ , single wavelength output after an optical filter) for HPLC analysis and peptides/protein modification.

A 311 nm UV lamp (21.2 mW  $\text{cm}^{-2}$ ) for the amplified photoreaction.

The photo-irradiation power density of various light sources in photochemical transformation experiments were measured by an optical power meter produced by Thorlabs.

### 1.4 General CuAAC conjugation procedure

Tris(2-carboxyethyl)phosphine (TCEP) and the CuAAC click chemistry ligand 3,3',3''-(4,4',4''-Nitriлотris(methylene))tris(*1H*-1,2,3-triazole-4,1-diyl))tris(propan-1-ol) (THPTA) were purchased from

Admas, and azide-Alexa-647 was purchased from Beyotime Biotechnology.

Stock solution: 2.0 mM of azide-Alexa-647 in DMSO; 20 mM of THPTA in DMSO; 200 mM of TCEP in water; 200 mM of CuSO<sub>4</sub> in water;

1.0 μL of azide-Alexa-647 stock solution, 4.0 μL of THPTA stock solution, 4.0 μL of TCEP stock solution, 4.0 μL of CuSO<sub>4</sub> stock solution, and 16 μL water were mixed as working solution. Incubate the 20 μL sample mixture and 2.0 μL working solution for 1.5 h with gentle mixing before subjecting to SDS-PAGE analysis.

## 2. Supplemental figures and tables

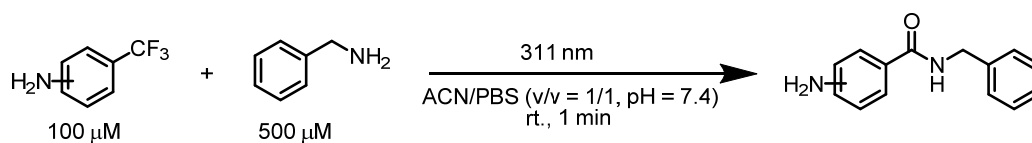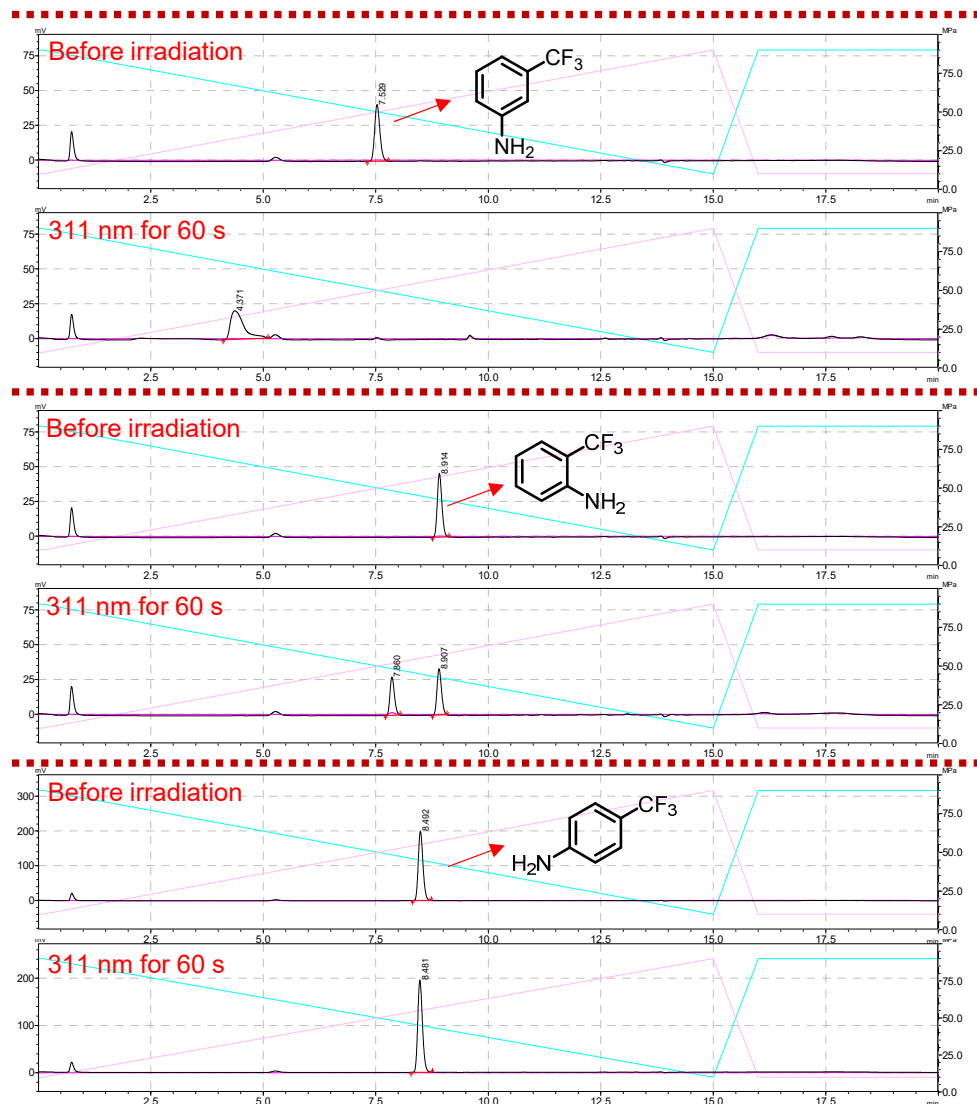

**Figure S1.** Efficiency evaluation of the photo-click reaction for meta-/ortho-/para-trifluoromethylaniline (100  $\mu$ M) toward benzylamine (500  $\mu$ M) in ACN/PBS ( $v/v = 1/1$ , pH = 7.4).



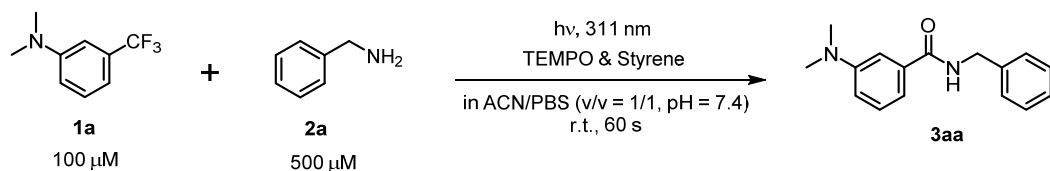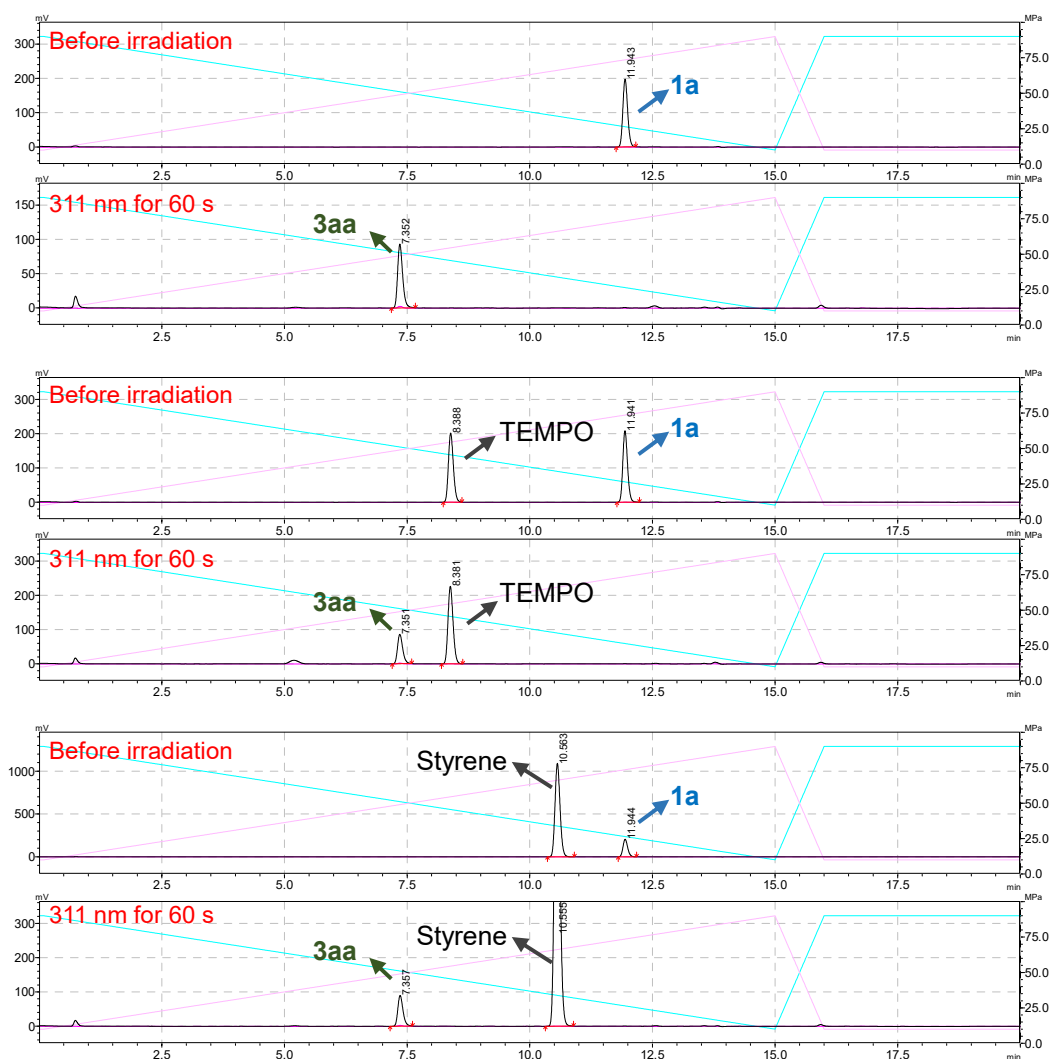

|                              | Peak       | Retention Time | Integrated Area |
|------------------------------|------------|----------------|-----------------|
| Control                      | <b>1a</b>  | 11.943         | 1342105         |
|                              | <b>3aa</b> | 7.352          | 665559          |
| TEMPO (750 $\mu\text{M}$ )   | <b>1a</b>  | 11.941         | 1393514         |
|                              | <b>3aa</b> | 7.351          | 629036          |
| Styrene (750 $\mu\text{M}$ ) | <b>1a</b>  | 11.944         | 1359646         |
|                              | <b>3aa</b> | 7.357          | 652326          |

**Figure S2.** Radical quenching tests toward the photo-DAFEx reactions. Reaction condition: **1a** (100  $\mu\text{M}$ ) and **2a** (500  $\mu\text{M}$ ) in 1.0 mL of ACN/PBS (v/v = 1/1, pH = 7.4) with or without TEMPO/Styrene (750  $\mu\text{M}$ ) were irradiated with a 311 nm lamp (5.9  $\text{mW cm}^{-2}$ , single wavelength output after an optical filter) for 60 s, and the resulting samples were analysed by HPLC.

**Note S1.** Determination of the photoreaction quantum yields ( $\Phi_R$ ) for the photo-defluorination of **1a-1h**.

The photo-defluorination quantum yields of **1a-1h** were determined by using potassium ferrioxalate-based chemical actinometer<sup>1</sup>. In brief, a 250  $\mu$ L fresh solution of 6 mM potassium ferrioxalate in 0.1 N H<sub>2</sub>SO<sub>4</sub> aqueous solution was irradiated with the 311 nm lamp (2.9 mW cm<sup>-2</sup>, single wavelength output after an optical filter) in a quartz cuvette (0.2 cm  $\times$  1.0 cm optical path) for specified times before quenching by addition of 4.75 mL of NaOAc/HOAc buffer (pH = 4.3) and 5.0 mL of 0.1% 1,10-phenanthroline solution in water to develop the characteristic colour at 510 nm. The mixture was stirred for 30 min before UV-Vis measurement. All the works were carried out in the dark and the samples were also protected from light with aluminium foil during handling. All the operating procedures were the same for both the chemical actinometer and tested samples (direct measurement without developing process), including light sources, experimental setup, volume of the solution, and the cuvette. The quantum yield for a test compound was calculated based on the following equations:

The incident monochromic photon flux  $I_0$ :

$$I_0 = \frac{d[Act]}{dt} \times [1/(1 - 10^{-Abs_c})]/\Phi_c = \frac{d[photo-DAFEx]}{dt} \times [1/(1 - 10^{-Abs_t})]/\Phi_t \quad 2,3$$

Because at the initial photo-conversion stage:  $\frac{d[Act]}{dt} = \frac{dAbs_{product}}{dt} \left(\frac{1}{\epsilon_{product}}\right)$ , therefore:

$$I_0 = (40 \times k_c/\epsilon_{510}l) \times [1/(1 - 10^{-Abs_c})]/\Phi_c = (k_t/\Delta\epsilon_p l) \times [1/(1 - 10^{-Abs_t})]/\Phi_t$$

The subscript “c” represents to the parameters of the chemical actinometer;

The subscript “t” represents to the parameters of the tested compound **1a-1h**, and “p” for the corresponding acyl fluorides. Therefore:

$$\Phi_{reac.} = \Phi_t = [(1 - 10^{-\epsilon_c c_c l})/(1 - 10^{-\epsilon_t c_t l})] \times [k_t/(40 \times k_c)] \times (\epsilon_{510}/\Delta\epsilon_p) \times \Phi_c$$

where  $\epsilon_c$  and  $\epsilon_t$  were extinction coefficients of the standard chemical actinometer and test samples (**1a-1h** at 311 nm), respectively.  $l = 1.0$  cm;

$k_t$  and  $k_c$  were the slopes of the linear fitting line of product formation in plots of absorbance changes versus time at the observing wavelength for the tested compound and the standard chemical actinometer, respectively. The zeroth-order photo-conversion rate ( $k_t$  and  $k_c$ ) could be only applied at very low conversion (as low as possible for the initial conversion rate) of the starting materials because the absorption of light by the products formed under such conditions is minimal at the initial stage. Noteworthy, the addition of the buffer solution and the developer during the colour readout of the actinometer conversion resulted in a 40-fold dilution, therefore the  $k_c$  need to be multiplied by 40 during the calculation;

$c_c$  and  $c_t$  were the concentrations of the standard actinometer and the test compound, respectively;  $\epsilon_{510}$ <sup>4</sup> and  $\Delta\epsilon_p$  were the extinction coefficients of the Fe<sup>2+</sup>-(1,10-phenanthroline)<sub>3</sub> complex at 510 nm for the actinometer and the difference in extinction coefficients of the acyl fluorides compared with the starting sample, **1a-1h**, at the monitoring wavelength, respectively. The photoreaction quantum yields of **1a-1h** in ACN/H<sub>2</sub>O (v/v = 1/1) with 311 nm irradiation were then obtained.

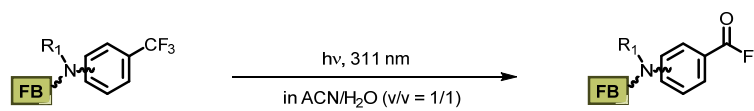

FB = Functional Blocks;

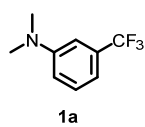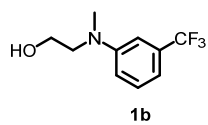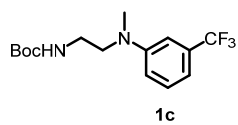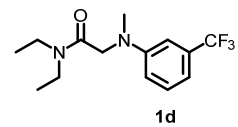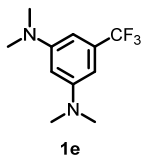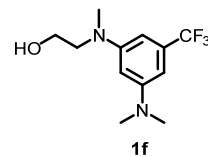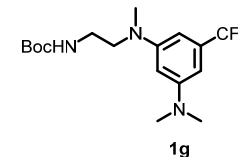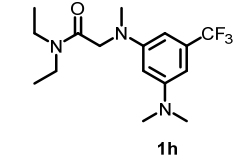

**Table S1.** The result of photochemical quantum yields ( $\Phi_R$ ) for the photo-defluorination of **1a-1h**.

|          | <b>1a</b> | <b>1b</b> | <b>1c</b> | <b>1d</b> | <b>1e</b> | <b>1f</b> | <b>1g</b> | <b>1h</b> |
|----------|-----------|-----------|-----------|-----------|-----------|-----------|-----------|-----------|
| $\Phi_R$ | 0.17      | 0.14      | 0.16      | 0.15      | 0.13      | 0.16      | 0.12      | 0.12      |

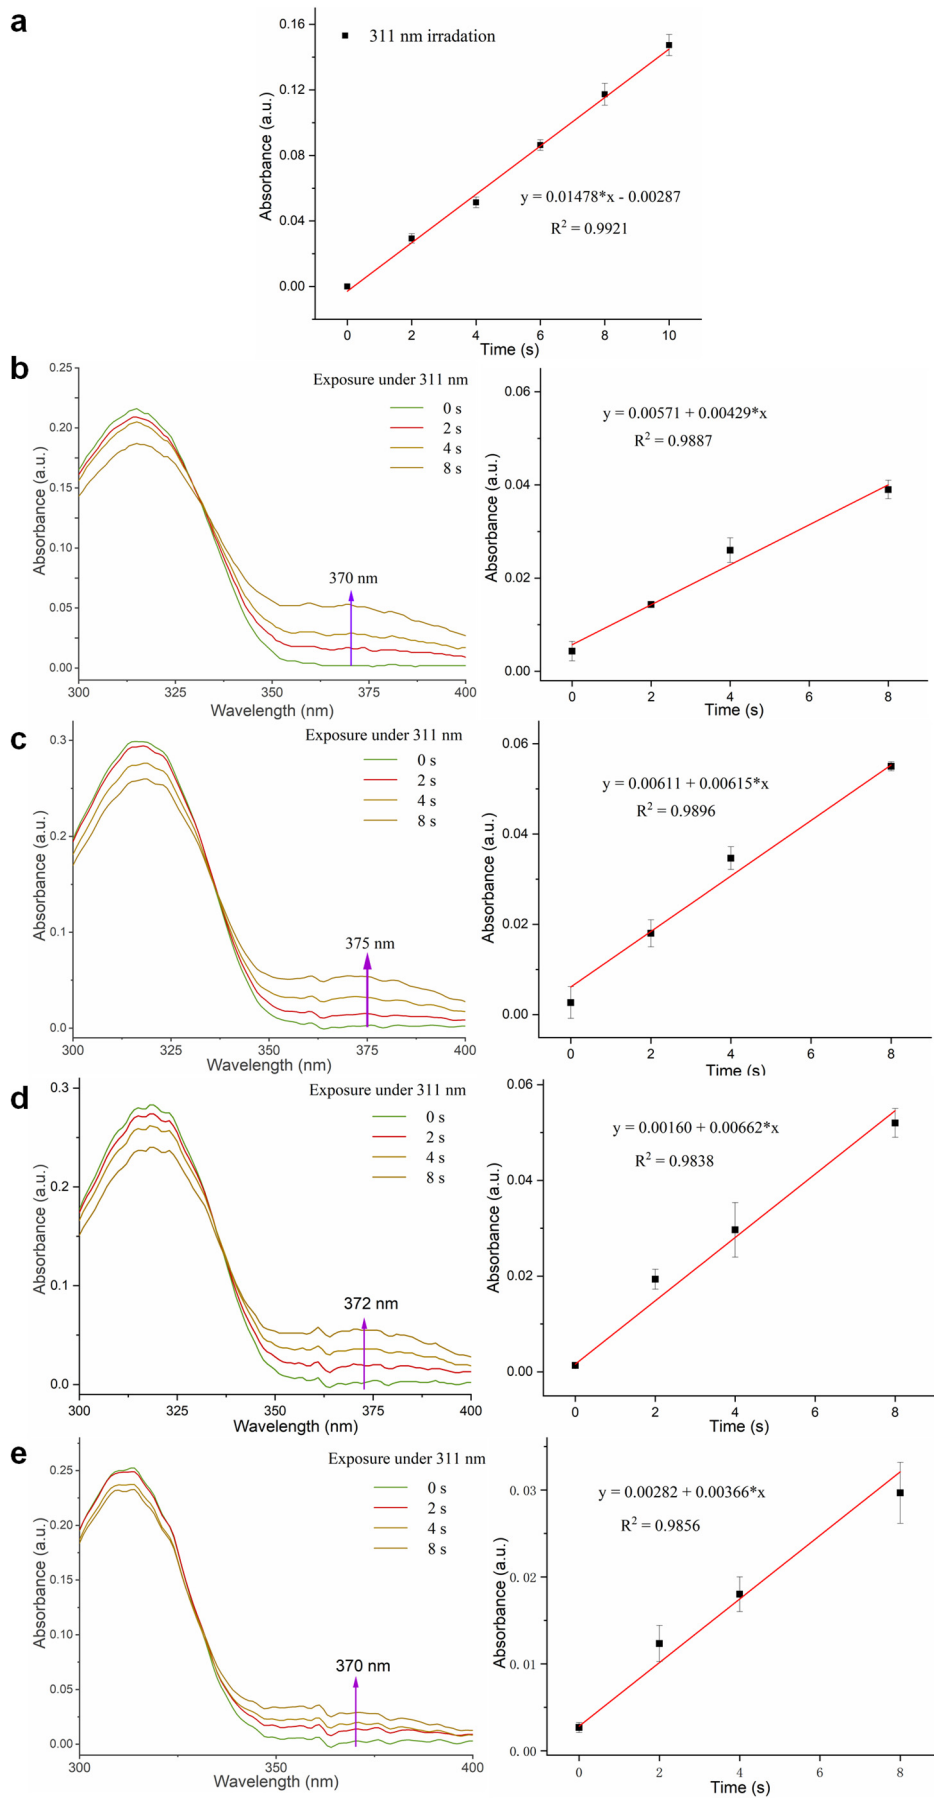

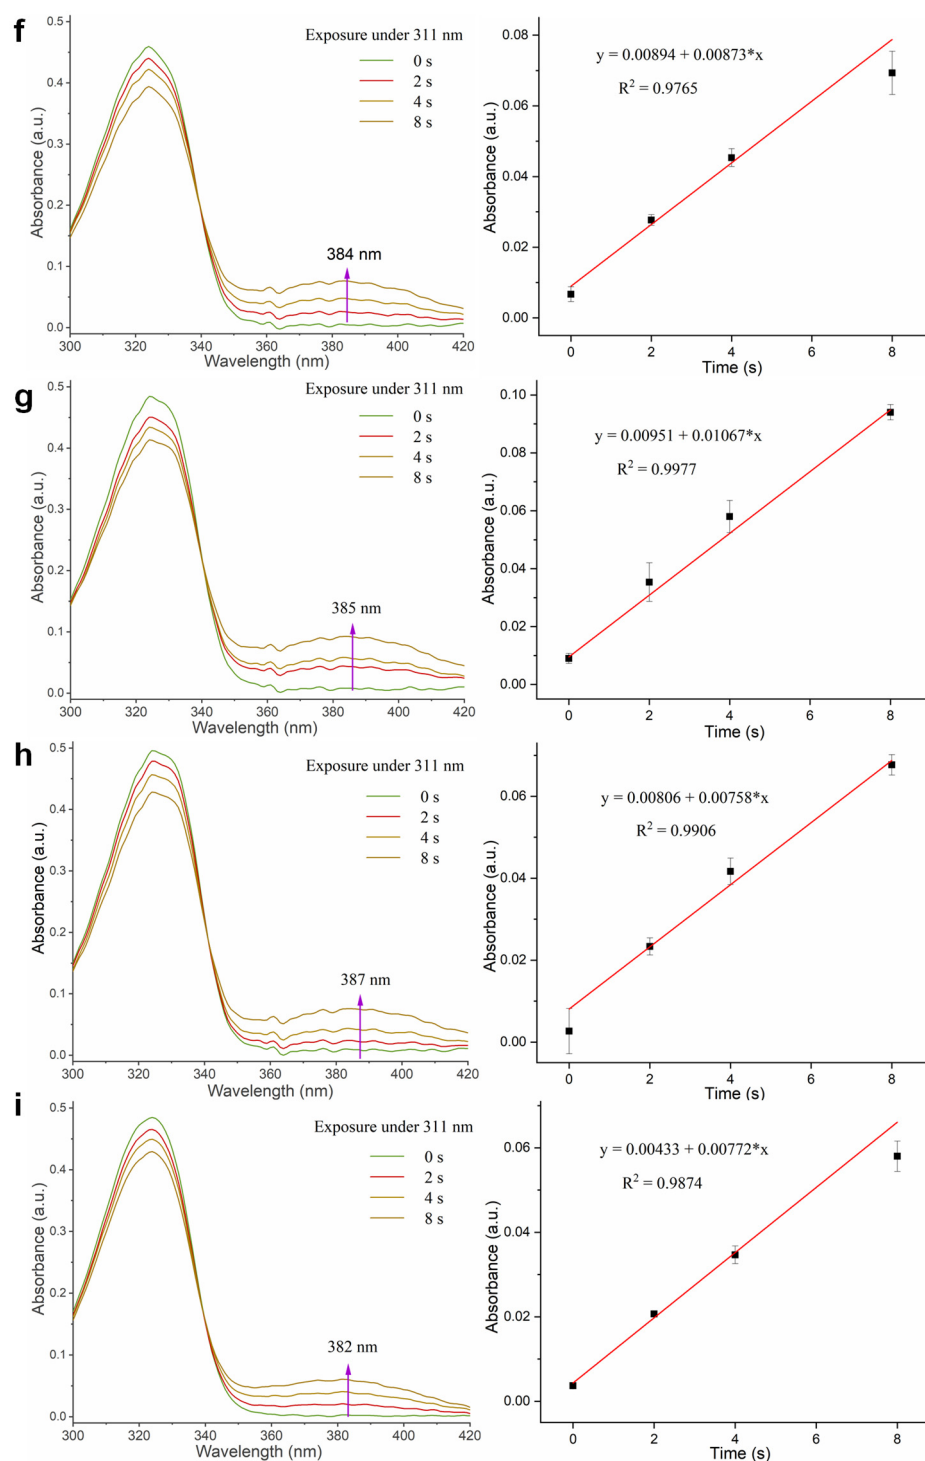

**Figure S3.** Determination of the photo-defluorination quantum yields by using a potassium ferrioxalate-based chemical actinometer. **a)** Time-course of absorbance changing for observing the formation of  $\text{Fe}^{2+}$ - $(1,10\text{-phenanthroline})_3$  complex at 510 nm with a linear fitting curve, which was induced by the 311 nm irradiation from the lamp to the actinometer. **b-i)** Time-course of absorbance changing for the photo-defluorination of the trifluoromethylaniline derivatives (**1a-1h**) to corresponding acyl fluorides under 311 nm irradiation with a linear fitting curve (monitored at the labelled wavelength for absorbance tracking).

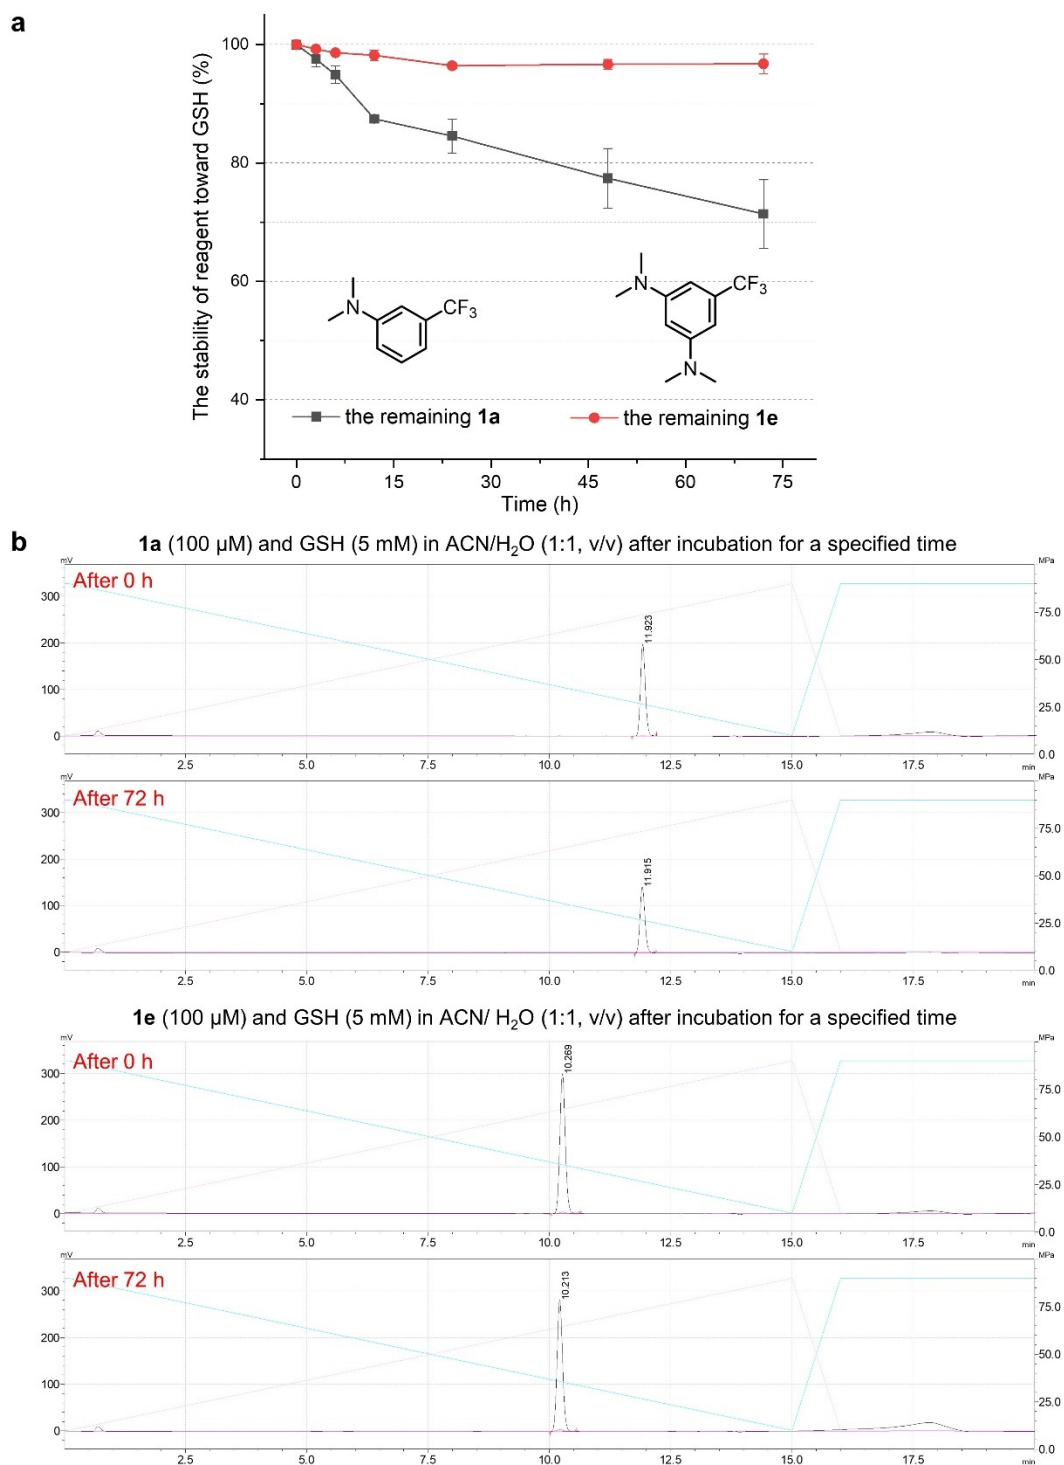

**Figure S4.** The stability test against thiol addition. a) The stability testing results for **1a/1e** (100  $\mu$ M) toward GSH (5.0 mM) in ACN/H<sub>2</sub>O (v/v = 1/1) after incubation for a specific time analysed by quantitative HPLC. The stability of the reagents was determined by the ratio of integrated peak areas of the **1a/1e** left at the designated time point in each HPLC trace to the original samples without incubation. b) The HPLC traces for the reaction between **1a/1e** (100  $\mu$ M) and GSH (5.0 mM) in ACN/H<sub>2</sub>O (v/v = 1/1) before and after 72 h incubation in dark.

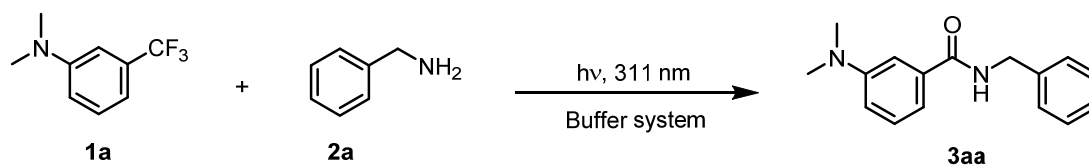

**Table S2.** Optimization on the buffer system for the photo-DAFEx reaction.

| Entry | Buffer System                                                                  | Yield of 3aa                                |
|-------|--------------------------------------------------------------------------------|---------------------------------------------|
| 1     | ACN/PBS (v/v = 1/1, pH = 7.4)                                                  | 93.6% <sup>#</sup> ; 83.1% <sup>&amp;</sup> |
| 2     | ACN/NaOAc-HOAc (v/v = 1/1, pH = 4.1)                                           | 54.4% <sup>#</sup>                          |
| 3     | ACN/NaHCO <sub>3</sub> -Na <sub>2</sub> CO <sub>3</sub> (v/v = 1/1, pH = 11.2) | 73.1% <sup>#</sup>                          |
| 4     | ACN/H <sub>2</sub> O (v/v = 1/1)                                               | 85.9% <sup>#</sup>                          |
| 5     | MeOH/PBS (v/v = 1/1, pH = 7.4)                                                 | 24.9% <sup>#</sup>                          |
| 6     | DCM/PBS (v/v = 1/1, pH = 7.4)                                                  | N.D. <sup>&amp;</sup>                       |
| 7     | Dioxane/PBS (v/v = 1/1, pH = 7.4)                                              | 85.3% <sup>&amp;</sup>                      |
| 8     | DMF/PBS (v/v = 1/1, pH = 7.4)                                                  | 80.6% <sup>&amp;</sup>                      |
| 9     | DMSO/PBS (v/v = 1/1, pH = 7.4)                                                 | 79.1% <sup>&amp;</sup>                      |

<sup>#</sup> Reaction condition: the reaction was conducted with **1a** (100 μM) and **2a** (500 μM) in 1.0 mL of the buffer system, and irradiated with a 311 nm lamp (5.9 mW cm<sup>-2</sup>) for 1 min. <sup>#</sup>HPLC yields were determined by external standards.

<sup>&</sup> Reaction conditions: the reaction was conducted with **1a** (20 mg, 0.11 mmol) and **2a** (58 mg, 0.55 mmol) in 200 mL of buffer system, and irradiated with 311 nm lamp (21.2 mW cm<sup>-2</sup>) for 1.0 h.

<sup>&</sup>Isolated yields of desired products were given.

N.D. = not detected

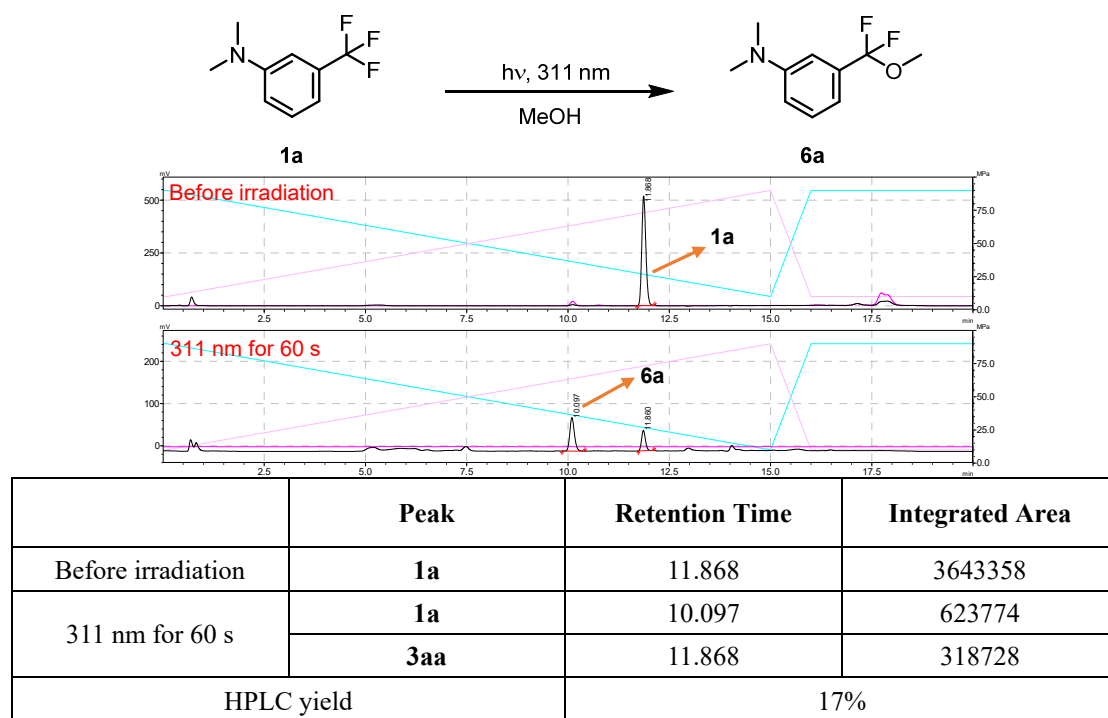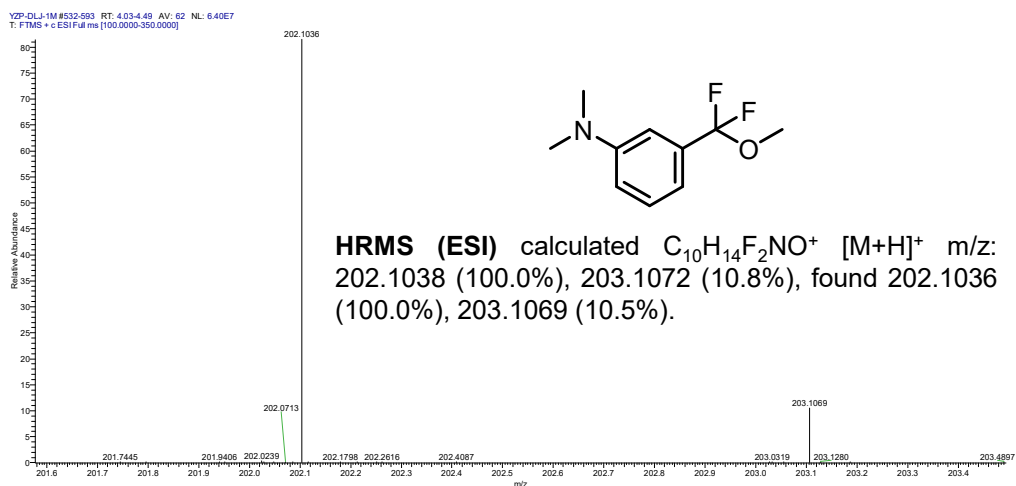

**Figure S5.** Photo-induced defluorination reaction of **1a** in anhydrous MeOH as both the solvent and the reactant. Reaction condition: the reaction was conducted with **1a** (100  $\mu$ M) in 1.0 mL of absolute MeOH, and irradiated with a 311 nm lamp (5.9 mW  $cm^{-2}$ ) for 1.0 min.



**Note S2.** Determination of the half-life ( $t_{1/2}$ ) of benzoyl fluoride **5a** in ACN/PBS (v/v = 1:1, pH = 7.4).

The hydrolysis of benzoyl fluoride (**5a**) in ACN/PBS (v/v = 1:1, pH = 7.4) at room temperature can be regarded as a *pseudo*-first-order reaction because the concentration of water is almost constant in the buffer and in great excess. In brief, 100  $\mu$ M of **5a** in ACN/PBS (v/v = 1:1, pH = 7.4) was placed in a sealed sample vial at room temperature for incubation. After incubation for a specific time, the concentration of **5a** was analysis *via* HPLC to determine the remaining **5a** in the sealed vial,  $n = 3$ .

The *pseudo*-first-order reaction rate constant  $k$  was calculated based on the following equations:

$$\ln\left(\frac{a}{c}\right) = kt$$

$a$  represents to the initial concentration of **5a**;  $c$  represents to the concentration of **5a** at the specific time. Therefore:

$$t_{1/2} = \frac{\ln 2}{k}$$

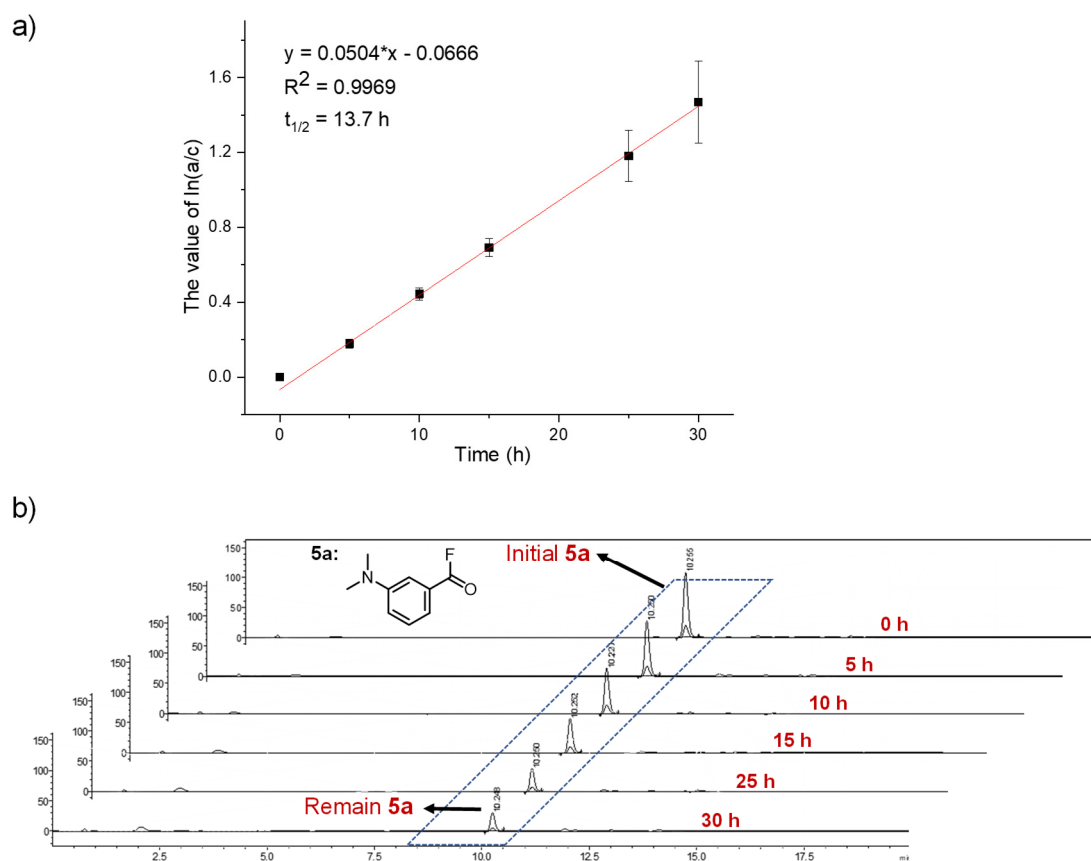

**Figure S6.** a) Time-course tracking of the decaying of **5a** in aqueous to determine the value of  $\ln\left(\frac{a}{c}\right)$  with a linear fitting curve; b) HPLC traces of **5a** after incubation for a specific time.

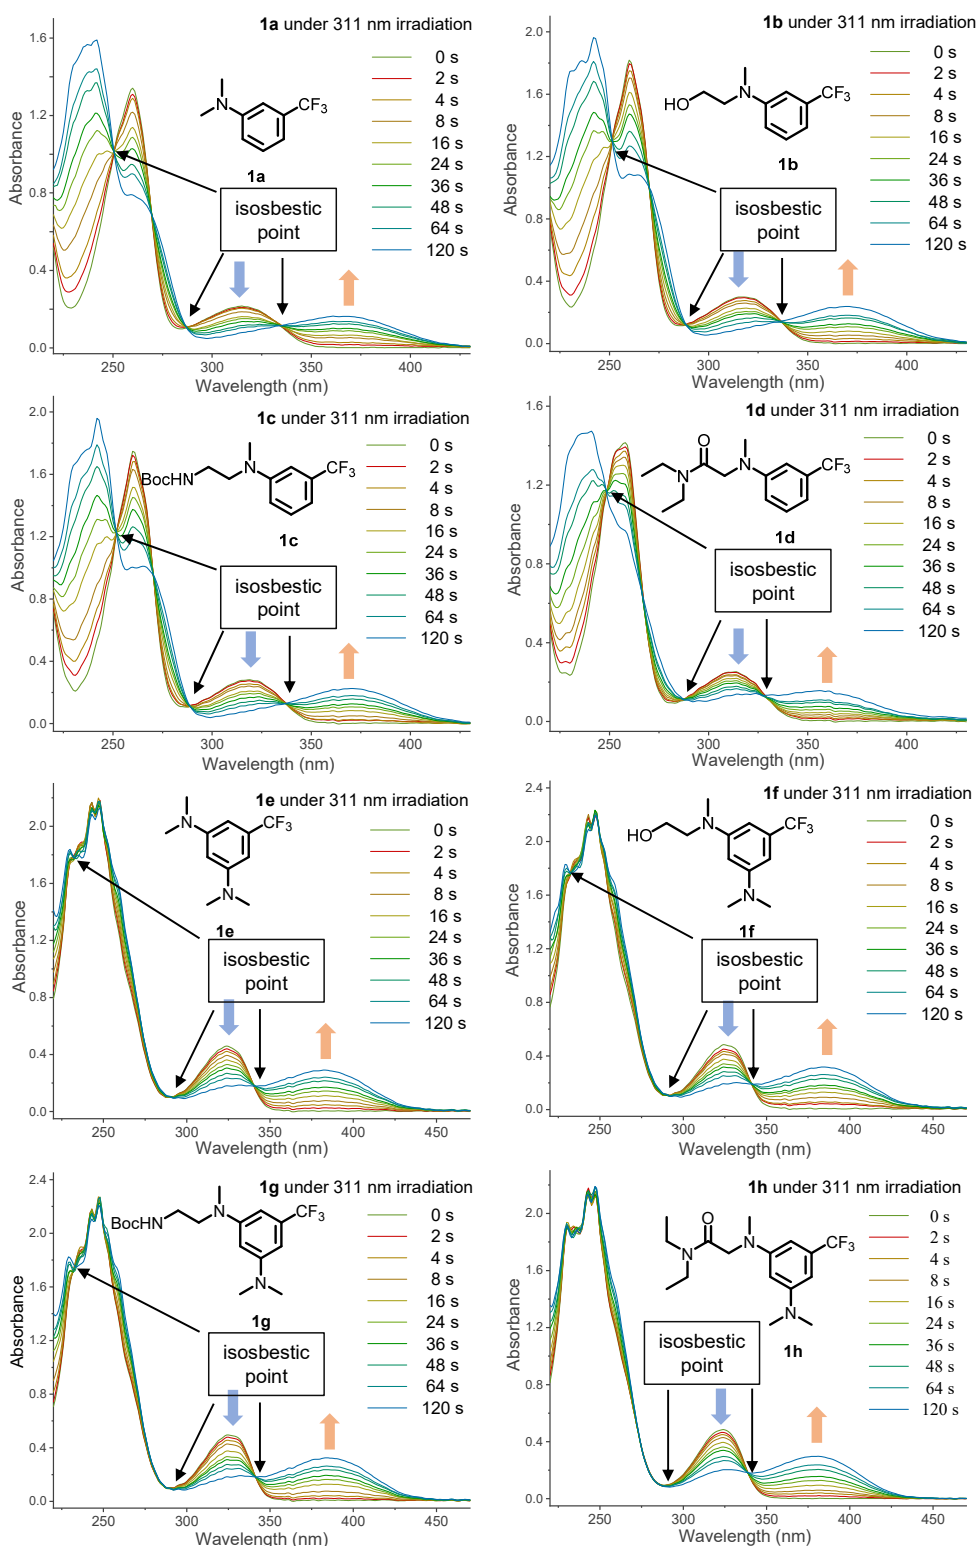

**Figure S7.** The absorption spectra evolution for tracking the photo-defluorination process from **1a-1e** to corresponding acyl fluorides. In detail, **1a-1e** (100  $\mu\text{M}$ ) in ACN/H<sub>2</sub>O (v/v = 1/1) were irradiated with a 311 nm lamp (2.9 mW cm<sup>-2</sup>, single wavelength output after an optical filter) in a quartz cuvette (0.2 cm  $\times$  1.0 cm optical path) for a specified time, and the spectra were readout by UV-Vis spectrophotometer.  $l = 1.0$  cm for absorbance detection and  $l = 0.2$  cm for irradiation at 311 nm.

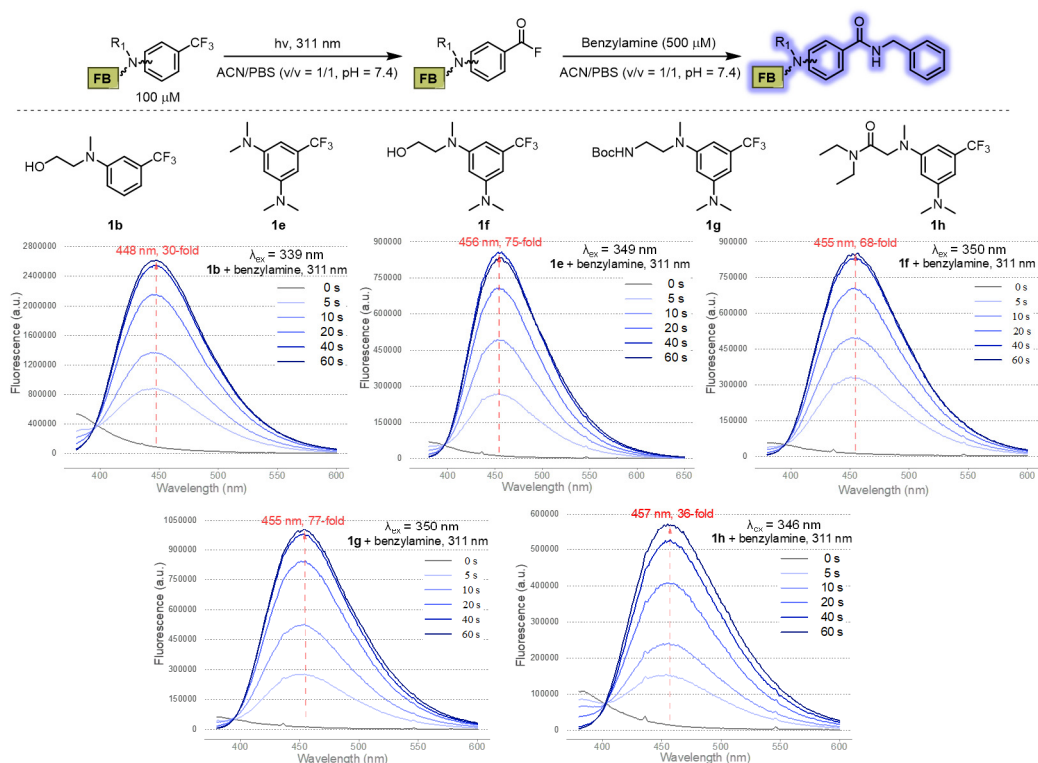

**Figure S8.** Time-resolved evolution in fluorescence emission intensity for the photo-DAFEx reaction with benzylamine upon irradiation with the 311 nm lamp ( $5.9 \text{ mW cm}^{-2}$ , single wavelength output after an optical filter).

**Table S3.** The photophysical data of the fluorescence emission for the photo-DAFEx products, **3aa-3ca**

| Products              | <b>3aa</b> |      |      |      | <b>3ba</b> | <b>3ca</b> |
|-----------------------|------------|------|------|------|------------|------------|
| $\lambda_{\text{ex}}$ | 338 nm     |      |      |      | 339 nm     | 345 nm     |
| Solvent               | ACN/PBS*   | MeOH | DMSO | DCM  | ACN/PBS*   | ACN/PBS*   |
| $\epsilon$            |            | 32.7 | 46.7 | 8.96 |            |            |
| $\Phi_{\text{F}}$     | 0.25       | 0.22 | 0.75 | 0.59 | 0.22       | 0.45       |

Note: \* represent a mixed solvent of ACN/PBS ( $v/v = 1/1$ ,  $\text{pH} = 7.4$ ).  $\epsilon$  is the dielectric constant of the solvent medium.

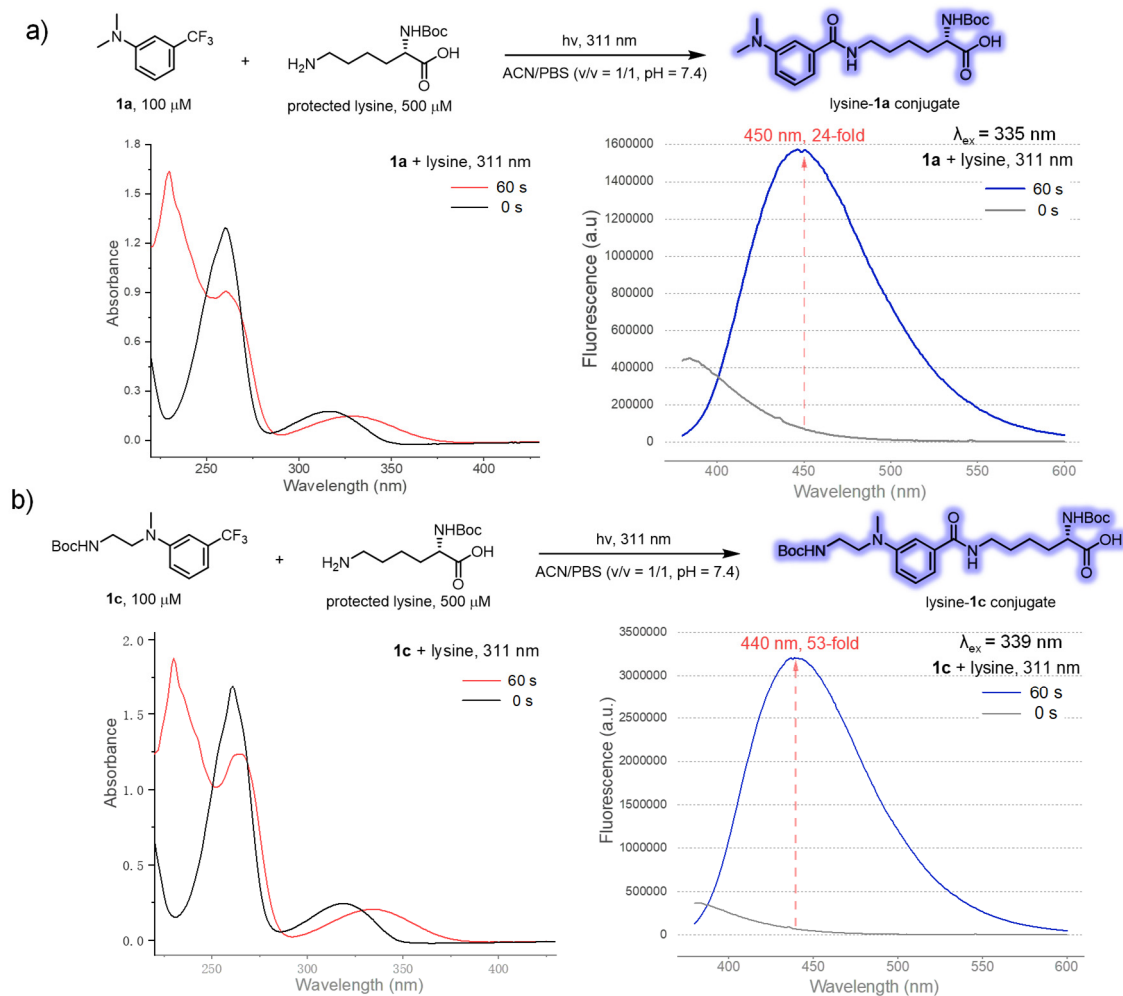

**Figure S9.** Spectral characters in both the absorbance and the fluorescence emission intensity before and after the photo-DAFEx. a) **1a** (100  $\mu\text{M}$ ) and b) **1c** (100  $\mu\text{M}$ ) in presence of *N*-Boc protected lysine (500  $\mu\text{M}$ ) upon the 311 nm lamp irradiation (5.9  $\text{mW cm}^{-2}$ , single wavelength output after an optical filter) irradiation for 60 s.

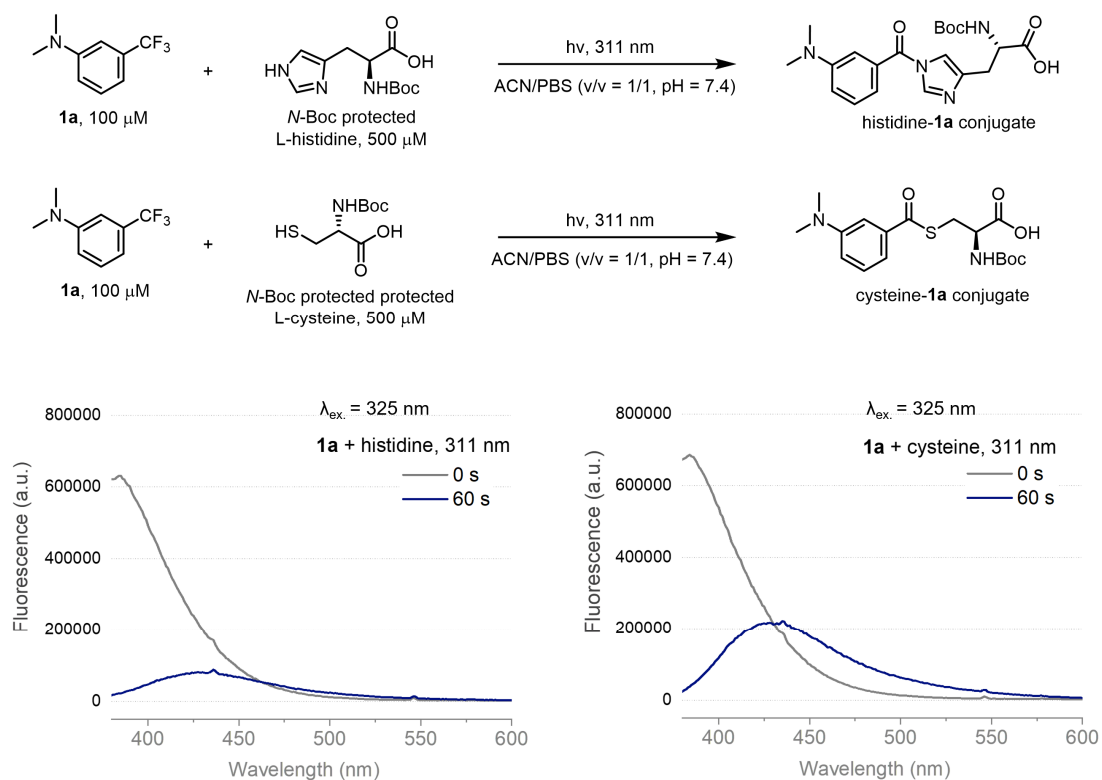

**Figure S10.** Spectral characters in the fluorescence emission intensity for **1a** (100  $\mu\text{M}$ ) in presence of *N*-Boc protected histidine/cysteine (500  $\mu\text{M}$ ) before and after photo-DAFEx with the 311 nm lamp (5.9  $\text{mW cm}^{-2}$ , single wavelength output after an optical filter) for 60 s.

**Note S3.** Kinetic studies on the photo-DAFEx reaction between the benzoyl fluoride intermediate generated from *m*-trifluoromethylaniline derivative **1c** and benzylamine **2a**.

The second-order rate constants  $k_2$  for the reaction between acyl fluoride intermediate from **1c** (10  $\mu\text{M}$ ) versus 500  $\mu\text{M}$ , 1000  $\mu\text{M}$ , 1500  $\mu\text{M}$ , and 2000  $\mu\text{M}$  (50-fold to 200-fold excess) of **2a** in ACN/PBS ( $v/v = 1/1$ , pH = 7.4) were measured under the *pseudo*-first-order conditions, and the amidation process were monitored by real-time tracking of the fluorescence intensity evolution at 445 nm.<sup>5</sup> Signals were read out by monitoring the fluorescence signal appearance of the desired benzamide product. Kinetic runs were recorded by using the following instrumental parameters: monitoring wavelength,  $\lambda_{\text{ex}} = 345 \text{ nm}$ ;  $\lambda_{\text{em}} = 445 \text{ nm}$ ; 2 data points per second over the recorded time range (0-65 s). The data sets were averaged out of at least three replicates, which were recorded and analysed with the commercial software, GraphPad Prism 7.

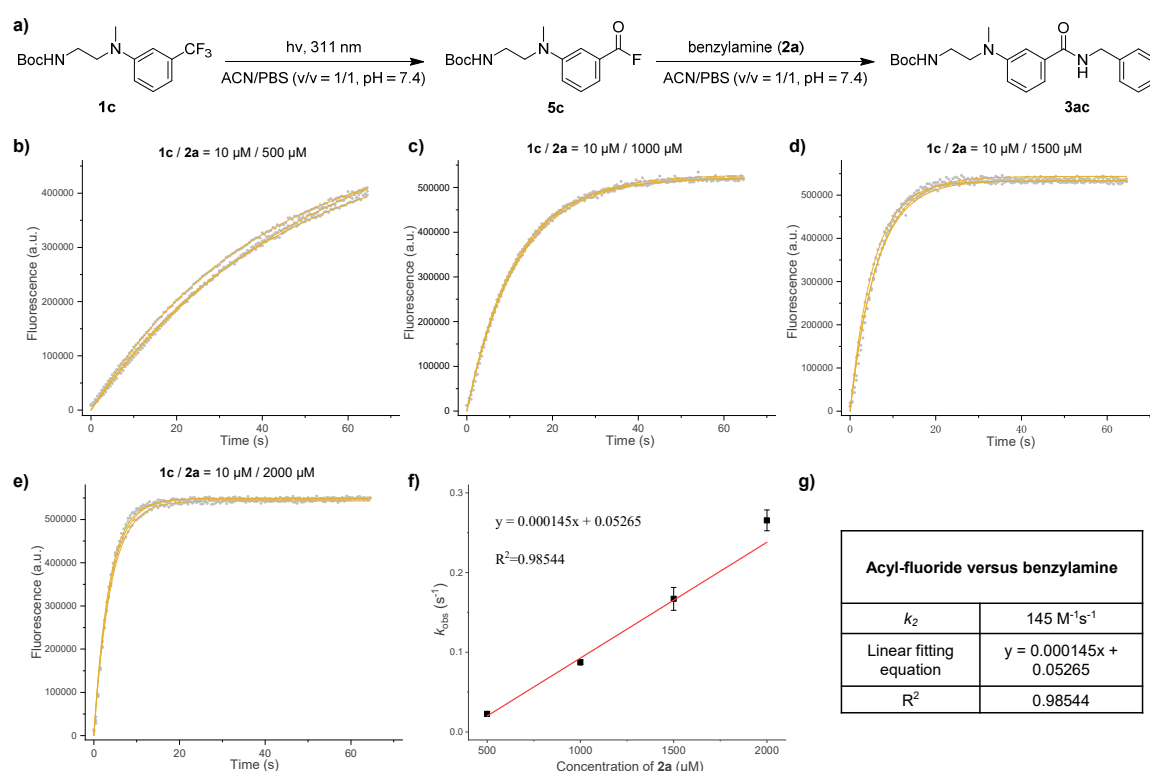

**Figure S11.** Kinetic study on the photo-DAFEx reaction. a) The schematic diagram of the reaction between the acyl fluoride intermediate from trifluoromethylaniline derivative **1c** versus **2a**. b-e) Plots for the fluorogenic conjugation between acyl fluoride **5c** and **2a** in a time-dependent manner. f) Plot of the apparent rate constant ( $k_{\text{obs}}$ ) versus the concentration of **2a** with the data fitted into a linear equation. g) Derived second-order rate constants  $k_2$  for the photo-DAFEx reaction between **5c** and **2a** at 298 K. Values were determined from three independent measurements. Error bars denote standard deviation from three experimental replicates ( $n = 3$ ).

**Note S4.** Sequence coverage based on the spliced peptide fragments from the LC-MS/MS analysis, for identification of the photo-labeling sites on proteins (The green highlight is the covered peptide sequence, and the potential labeling sites are marked in red colour).

**Lysozyme:** 78%

MRSLLILVLC FLPLAALGKV FGRCELAAAM KRHGLDNYRG YSLGNWVCAA KFESNFNTQA  
TNRNTDGSTD YGILQINSRW WCNDGRTPGS RNLCNIPCSA LLSSDITASV NCAKIVSDG  
NGMNAWVAWR NRC~~K~~GTDVQA WIRGCRL

**sfGFP:** 73%

MSKGEELFTG VVPILVELDG DVNGHKFSVR GEGEGDATNG KLT~~LK~~FICTT GKLVPWPPTL  
VTTLTYGVQC FSRYPDHMKR HDFFKSAMPE GYVQERTISF KDDGNY~~K~~TRA EVKFEGDTLV  
NRIELKGIDF KEDGNILGHK LEYNYNSHNV YITADKQKNG IKVNFKIRHN IEDGSVQLAD  
HYQQNTPIGD GPVLLPDNHY LSTQSALS~~K~~D PNEKR~~D~~HMVL LEFVTAAGIT HGMDELYKE  
HHHHHH

**BSA:** 80%

MKWVTFISLL LLSSAYSRG VFRRDTHKSE IAHRFKDLGE EHF~~K~~GLVLIA FSQYLQQCPF  
DEHVKLVNEL TEFAKTCVAD ESHAGCEKSL HTLFGDELCK VASLRÉTYGD MADCCEKQEP  
ERNECFLSHK DDSPDLPKLK PDPNTLCDEF KADEK~~K~~FWGK YLYEIARHP YFYAPELLYY  
ANKYNGVFQE CCQAEDKGAC LLPKIETMRE KVLASSARQR LR~~C~~ASIQKFG ERAL~~K~~AWSVA  
RLSQ~~K~~FPAE FVEVTKLVD LTKVHK~~E~~CCH GDLLECADDR ADLAKYICDN QDTISSKLKE  
CCDKP~~L~~LEKS HCIAEVEK~~D~~A IPENLPPLTA DFAEDK~~D~~VCK NYQEAKDAFL GSFLYEYSRR  
HPEYAVSVLL RLAKEYEATL EECCA~~K~~DDPH ACYSTVFDKL KHLVDEPQNL IK~~Q~~NCDQFEK  
LGEYGFQNAL IVRYTR~~K~~V~~P~~Q VSTPTLVEVS RSLGKVGTRC CTKPESERMP CTEDYLSLIL  
NRLC~~V~~LHEK~~T~~ PVSEKVT~~K~~CC TESLVNRRPC FSALTPDETY VPKAFDEK~~L~~F TFHADICTLP  
DTEKQIK~~K~~QT ALVELLKH~~K~~P KATEEQLKTV MENFVAFVDK CCAADDKEAC FAVEGPK~~L~~VV  
STOTALA

| #1 | b <sup>+</sup> | b <sup>2+</sup> | b <sup>3+</sup> | Seq.                                   | y <sup>+</sup> | y <sup>2+</sup> | y <sup>3+</sup> | #2 |
|----|----------------|-----------------|-----------------|----------------------------------------|----------------|-----------------|-----------------|----|
| 1  | 161.03793      | 81.02260        | 54.35083        | C-<br>Carbamidomethyl                  |                |                 |                 | 11 |
| 2  | 436.20130      | 218.60429       | 146.07195       | K-<br>C <sub>9</sub> H <sub>9</sub> NO | 1320.70590     | 660.85659       | 440.90682       | 10 |
| 3  | 493.22277      | 247.11502       | 165.07911       | G                                      | 1045.54252     | 523.27490       | 349.18569       | 9  |
| 4  | 594.27044      | 297.63886       | 198.76167       | T                                      | 988.52106      | 494.76417       | 330.17854       | 8  |
| 5  | 709.29739      | 355.15233       | 237.10398       | D                                      | 887.47338      | 444.24033       | 296.49598       | 7  |
| 6  | 808.36580      | 404.68654       | 270.12678       | V                                      | 772.44643      | 386.72686       | 258.15366       | 6  |
| 7  | 936.42438      | 468.71583       | 312.81298       | Q                                      | 673.37802      | 337.19265       | 225.13086       | 5  |
| 8  | 1007.46149     | 504.23438       | 336.49202       | A                                      | 545.31944      | 273.16336       | 182.44467       | 4  |
| 9  | 1193.54081     | 597.27404       | 398.51845       | W                                      | 474.28233      | 237.64480       | 158.76563       | 3  |
| 10 | 1306.62487     | 653.81607       | 436.21314       | I                                      | 288.20302      | 144.60515       | 96.73919        | 2  |
| 11 |                |                 |                 | R                                      | 175.11895      | 88.06311        | 59.04450        | 1  |

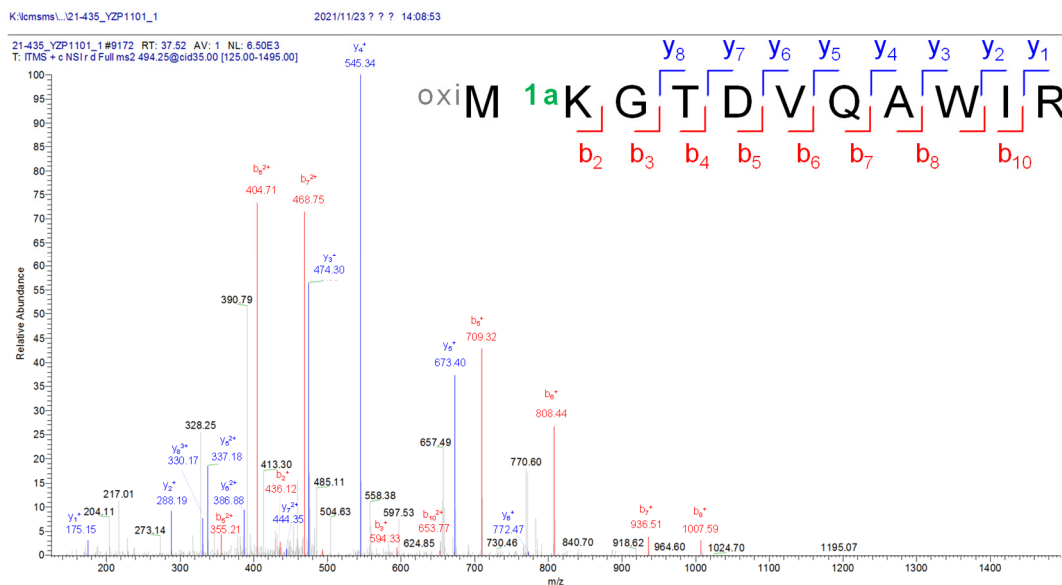

**Figure S12.** The LC-MS/MS spectrum and the ion peak analysis (b and y ions) for the key peptide fragment from lysozyme. Identification of the photo-labelled moiety at **K134** residue in the peptide fragment with the sequence displayed.



| #1 | b <sup>+</sup> | b <sup>2+</sup> | Seq.     | y <sup>+</sup> | y <sup>2+</sup> | #2 |
|----|----------------|-----------------|----------|----------------|-----------------|----|
| 1  | 116.03422      | 58.52075        | D        |                |                 | 8  |
| 2  | 231.06116      | 116.03422       | D        | 1000.48467     | 500.74597       | 7  |
| 3  | 288.08263      | 144.54495       | G        | 885.45773      | 443.23250       | 6  |
| 4  | 402.12555      | 201.56642       | N        | 828.43626      | 414.72177       | 5  |
| 5  | 565.18888      | 283.09808       | Y        | 714.39334      | 357.70031       | 4  |
| 6  | 840.35226      | 420.67977       | K-C9H9NO | 551.33001      | 276.16864       | 3  |
| 7  | 941.39994      | 471.20361       | T        | 276.16663      | 138.58695       | 2  |
| 8  |                |                 | R        | 175.11895      | 88.06311        | 1  |

K:\omsm\121-435\_YZP1101\_3

2021/11/12 ? ? ? 1:19:57

21-435\_YZP1101\_3#5142 RT: 22.32 AV: 1 NL: 1.31E4  
T: FTMS + c NSI r d Full ms2 558.25@cid35.00 [140.00-1130.00]

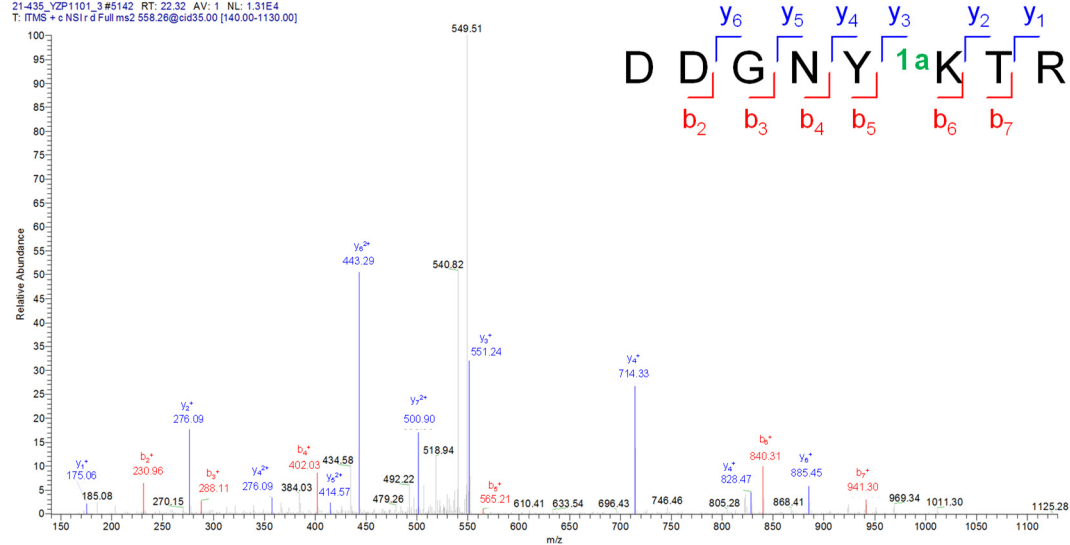

**Figure S13.** The LC-MS/MS spectrum and the ion peak analysis (b and y ions) for the key peptide fragment from sfGFP. Identification of the photo-labelled moiety at **K107** residue in the peptide fragment with the sequence displayed.

| #1 | b <sup>+</sup> | b <sup>2+</sup> | Seq.     | y <sup>+</sup> | y <sup>2+</sup> | #2 |
|----|----------------|-----------------|----------|----------------|-----------------|----|
| 1  | 72.04439       | 36.52583        | A        | 1077.62038     | 539.31383       | 9  |
| 2  | 185.12845      | 93.06787        | L        | 964.53631      | 482.77179       | 8  |
| 3  | 460.29183      | 230.64955       | K-C9H9NO | 964.53631      | 345.19011       | 7  |
| 4  | 531.32895      | 266.16811       | A        | 689.37293      | 345.19011       | 6  |
| 5  | 717.40826      | 359.20777       | W        | 618.33582      | 309.67155       | 5  |
| 6  | 804.44029      | 402.72378       | S        | 432.25651      | 216.63189       | 4  |
| 7  | 903.50870      | 452.25799       | V        | 345.22448      | 171.11588       | 3  |
| 8  | 974.54581      | 487.77655       | A        | 246.15607      | 123.58167       | 2  |
| 9  |                |                 | R        | 175.11895      | 88.06311        | 1  |

K:\ionsms\ionsms-31\ZP-XXY-1

2021/1/24 ? ? ? 11:06:40

Y2P-XXY-1 #12021 RT: 19.98 AV: 1 NL: 6.64E5  
T: FTMS + p NSId Full ms2 574.8344@hcd:27.00 [100.0000-1190.0000]

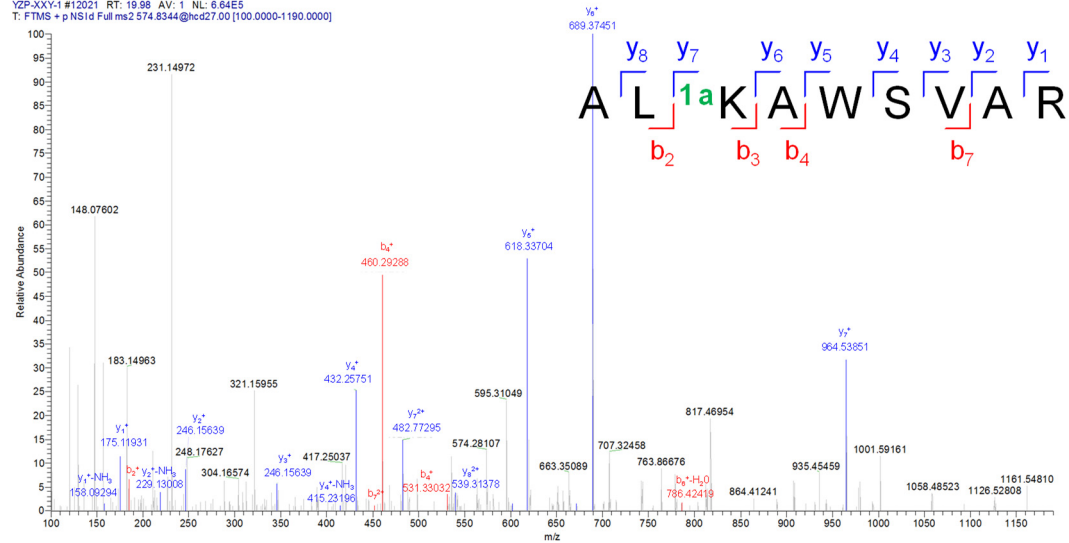

**Figure S14.** The LC-MS/MS spectrum and the ion peak analysis (b and y ions) for the key peptide fragment from BSA. Identification of the photo-labelled moiety at **K235** residue in the peptide fragment with the sequence displayed.

| #1 | b <sup>+</sup> | b <sup>2+</sup> | Seq.     | y <sup>+</sup> | y <sup>2+</sup> | #2 |
|----|----------------|-----------------|----------|----------------|-----------------|----|
| 1  | 114.09134      | 57.54931        | L        |                |                 | 7  |
| 2  | 201.12337      | 101.06532       | S        | 881.48796      | 441.24762       | 6  |
| 3  | 329.18195      | 165.09461       | Q        | 794.45994      | 397.73161       | 5  |
| 4  | 604.34532      | 302.67630       | K-C9H9NO | 666.39736      | 333.70232       | 4  |
| 5  | 751.41374      | 376.21051       | F        | 391.23398      | 196.12063       | 3  |
| 6  | 848.46650      | 424.73689       | P        | 244.16557      | 122.58642       | 2  |
| 7  |                |                 | K        | 147.11280      | 74.06004        | 1  |

K:\cmsms\lcmsms-3\YZP-XXY-1

2021/12/24 ? ? ? 11:06:40

YZP-XXY-1 #8672 RT: 15.83 AV: 1 NL: 1.42E6  
T: FTMS + p NSId Full ms2.497.7906@hcd27.00 [100.0000-1035.0000]

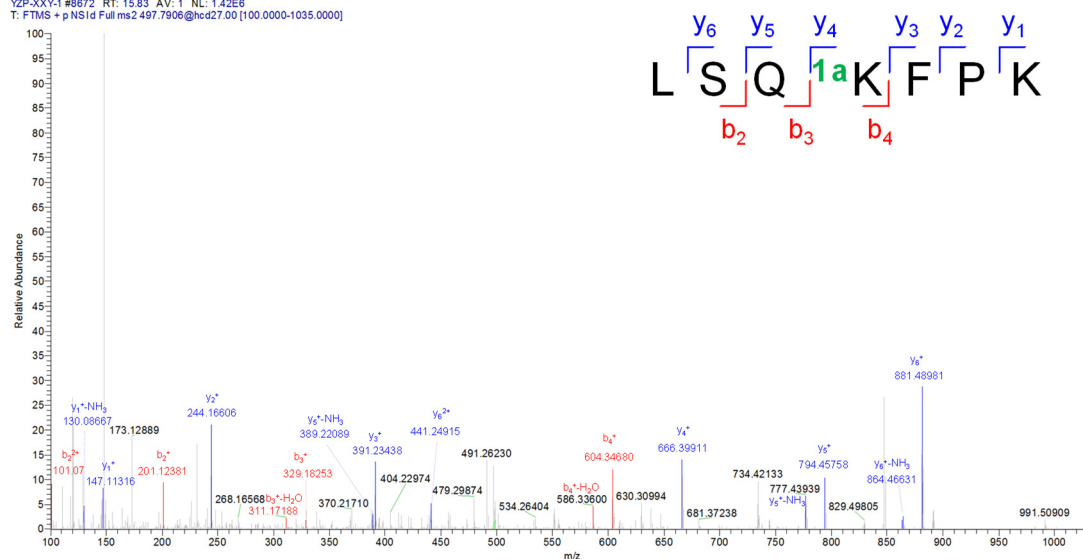

**Figure S15.** The LC-MS/MS spectrum and the ion peak analysis (b and y ions) for the key peptide fragment from BSA. Identification of the photo-labelled moiety at **K245** residue in the peptide fragment with the sequence displayed

| #1 | b <sup>+</sup> | b <sup>2+</sup> | Seq.     | y <sup>+</sup> | y <sup>2+</sup> | #2 |
|----|----------------|-----------------|----------|----------------|-----------------|----|
| 1  | 276.17065      | 138.58897       | K-C9H9NO |                |                 | 10 |
| 2  | 404.22923      | 202.61825       | Q        | 1014.61937     | 507.81332       | 9  |
| 3  | 505.27691      | 253.14209       | T        | 886.56080      | 443.78404       | 8  |
| 4  | 576.31402      | 288.66065       | A        | 785.51312      | 393.26020       | 7  |
| 5  | 689.39809      | 345.20268       | L        | 714.47600      | 357.74164       | 6  |
| 6  | 788.46650      | 394.73689       | V        | 601.39194      | 301.19961       | 5  |
| 7  | 917.50909      | 459.25819       | E        | 502.32353      | 251.66540       | 4  |
| 8  | 1030.59316     | 515.80022       | L        | 373.28093      | 187.14410       | 3  |
| 9  | 1143.67722     | 572.34225       | L        | 260.19687      | 130.60207       | 2  |
| 10 |                |                 | K        | 147.11280      | 74.06004        | 1  |

K:\cmsms\lcmsms-3\YZP-XXY-1

2021/12/24 ? ? ? 11:06:40

YZP-XXY-1 #14529 RT: 23.66 AV: 1 NL: 1.84E5  
T: FTMS + p NSId Full ms2 645.3976@hcd27.00 [100.0000-1335.0000]

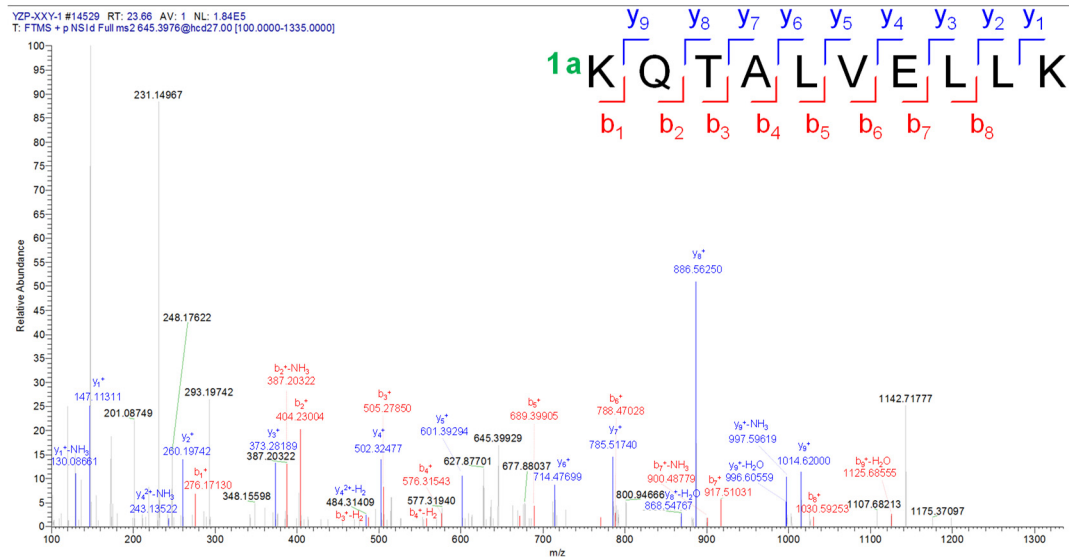

**Figure S16.** The LC-MS/MS spectrum and the ion peak analysis (b and y ions) for the key peptide fragment from BSA. Identification of the photo-labelled moiety at **K548** residue in the peptide fragment with the sequence displayed.

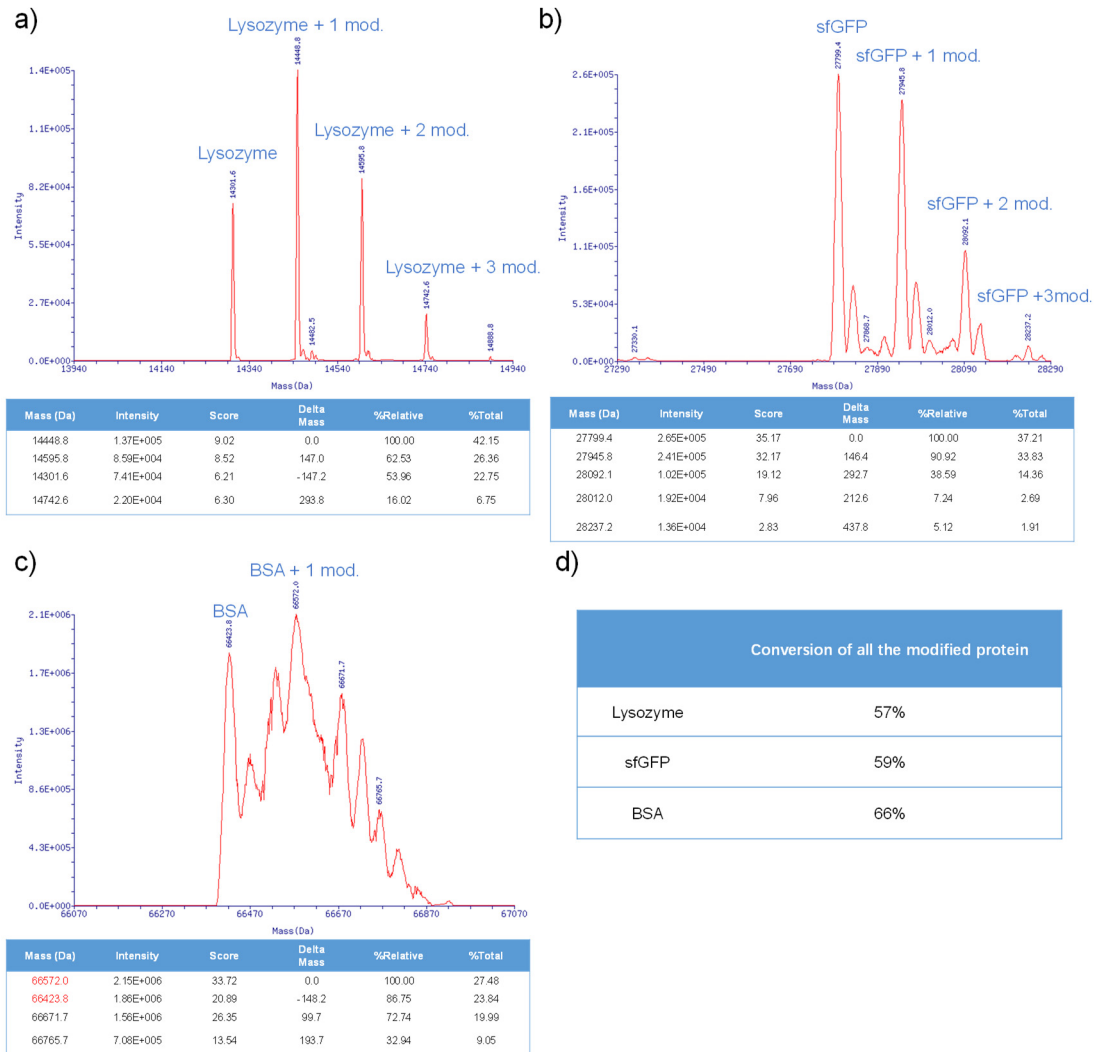

**Figure S17.** The deconvolution mass spectra of the photo-labelled protein (20  $\mu$ M) *via* the photo-DAFEx reaction with **1a** (50  $\mu$ M). a) lysozyme; b) sfGFP; c) BSA. d) The result of the photo-labeling conversion was determined by the ratio of the modified proteins in the deconvolution mass spectrum.

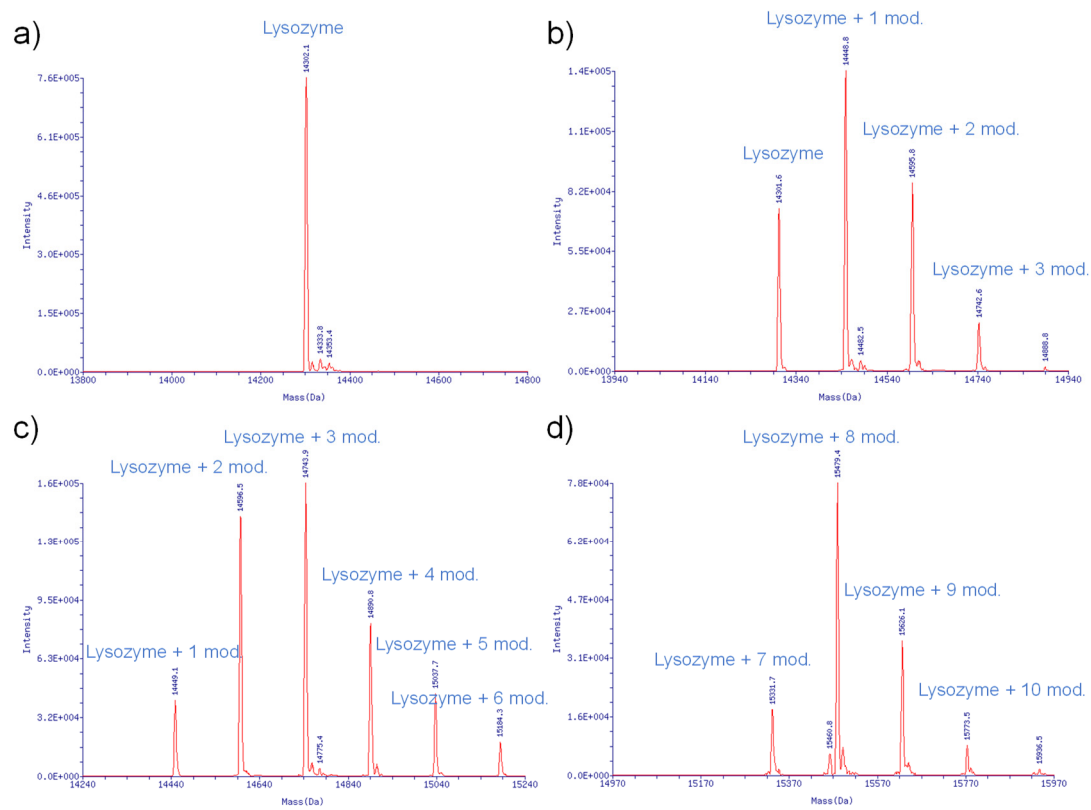

**Figure S18.** The deconvolution mass spectra for the multiple photo-labelled lysozyme (7.0 μM, 1.0 mg/mL) by the photo-DAFEx reactions with **1a** at various concentration: a) 0 μM, b) 20 μM, c) 50 μM, d) 100 μM.

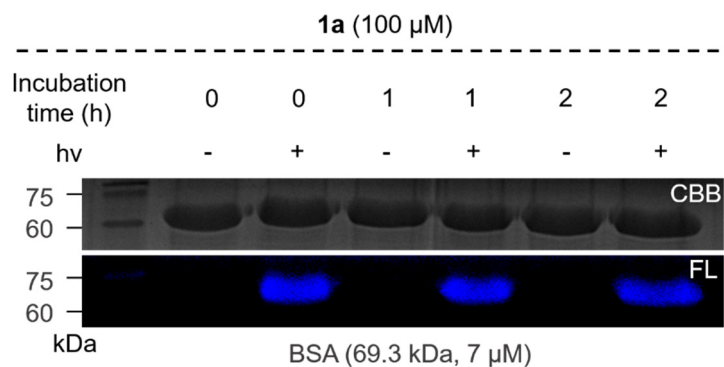

**Figure S19.** Fluorogenic protein decoration via photo-DAFEx visualized by in-gel fluorescence imaging and a time-course of incubation time. Reaction conditions: proteins ( $4.0 \text{ mg mL}^{-1}$ ) and *m*-trifluoromethylaniline reagents in PBS were treated with/without 311 nm light ( $5.9 \text{ mW cm}^{-2}$ ) for 60 s, then resolved by SDS-PAGE for imaging. CBB = Coomassie brilliant blue; FL = in-gel blue fluorescence channel.

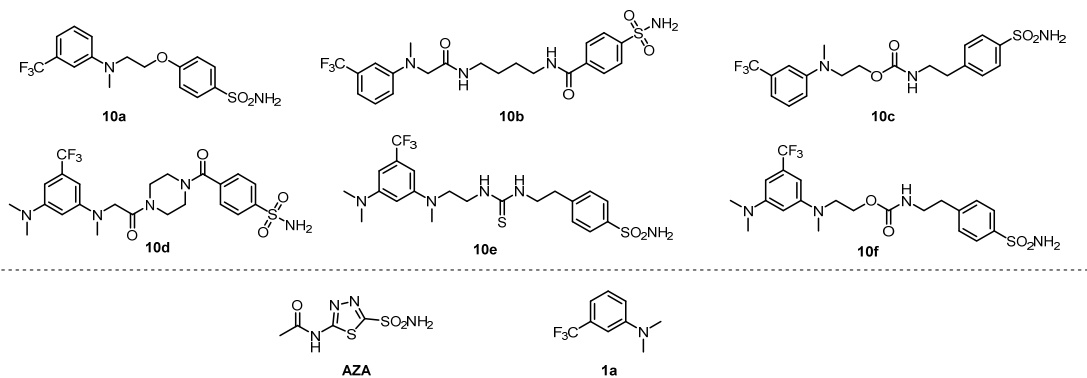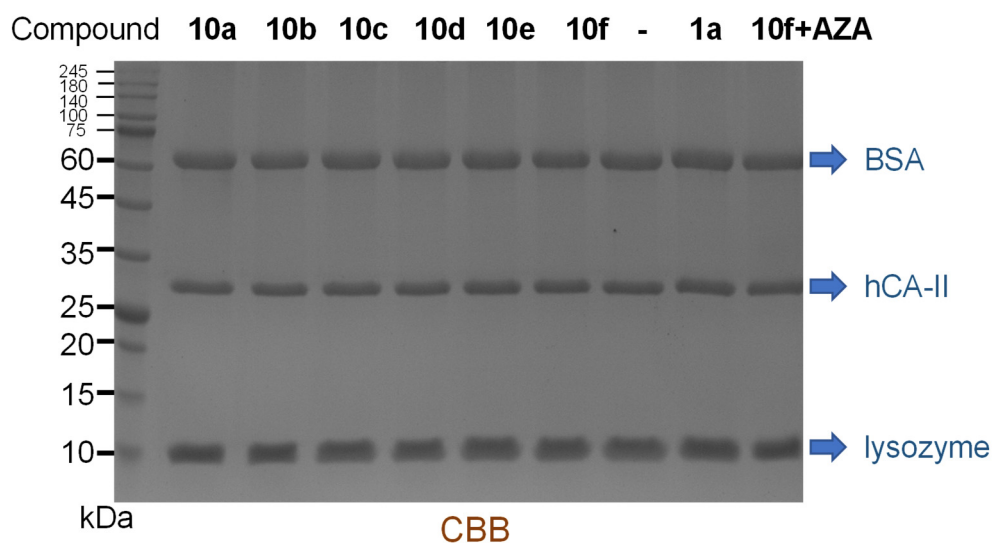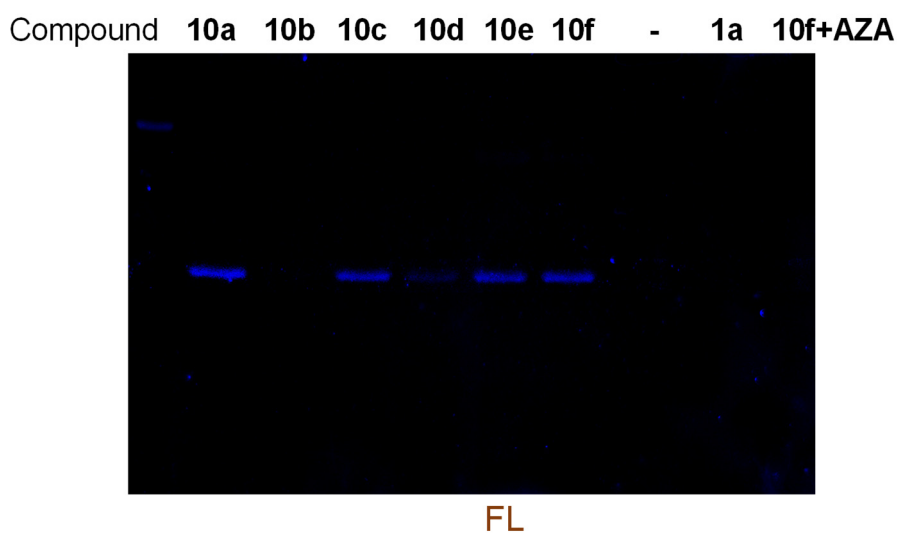

**Figure S20.** SDS-PAGE analysis of the protein mixture (including lysozyme (4.0 mg/mL, 28  $\mu$ M), hCA-II (4.0 mg/mL, 15  $\mu$ M) and BSA (4.0 mg/mL, 7  $\mu$ M)) after the photo-labelling with **10a-10f** (20  $\mu$ M) via the photo-DAFex chemistry in PBS (pH = 7.4). CBB: Coomassie brilliant blue staining; FL: in-gel blue fluorescence channel.



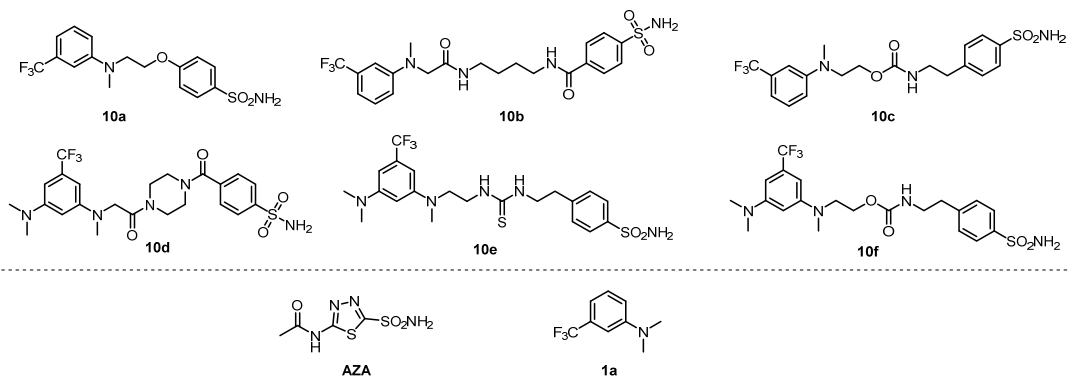

Compound 10a 10b 10c 10d 10e 10f - 1a 10f+AZA

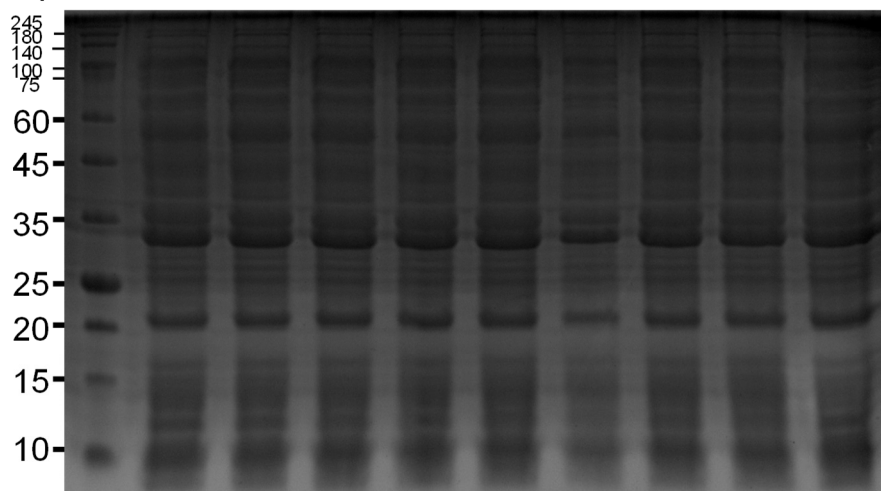

kDa

CBB

Compound 10a 10b 10c 10d 10e 10f - 1a 10f+AZA

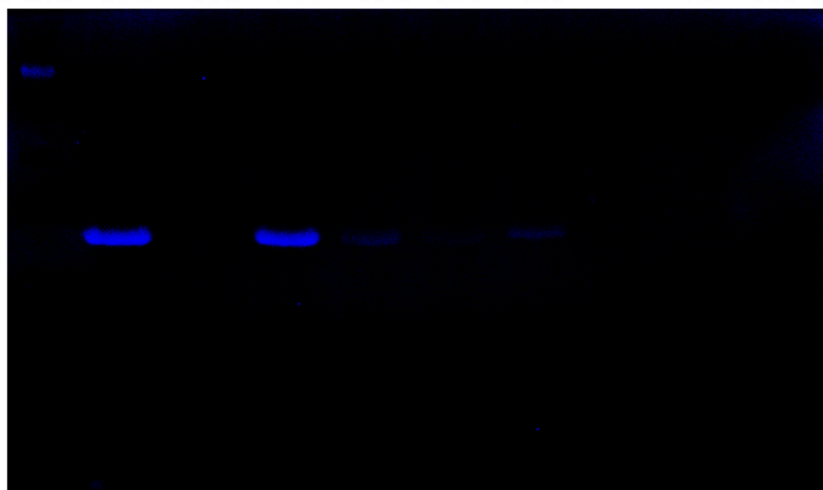

FL

**Figure S21.** SDS-PAGE analysis of the *E. Coli* cell lysates after the photo-labelling with **10a-10f** (20  $\mu$ M) via the photo-DAFex chemistry. CBB: Coomassie brilliant blue staining; FL: in-gel blue fluorescence channel.

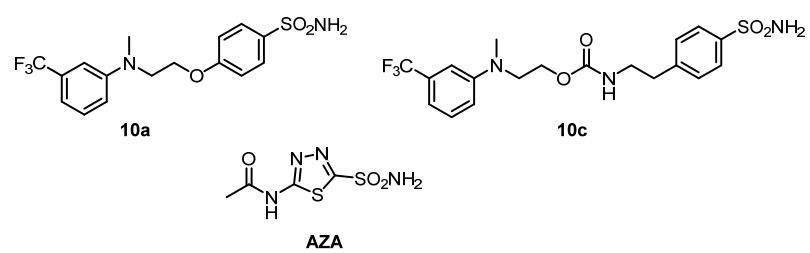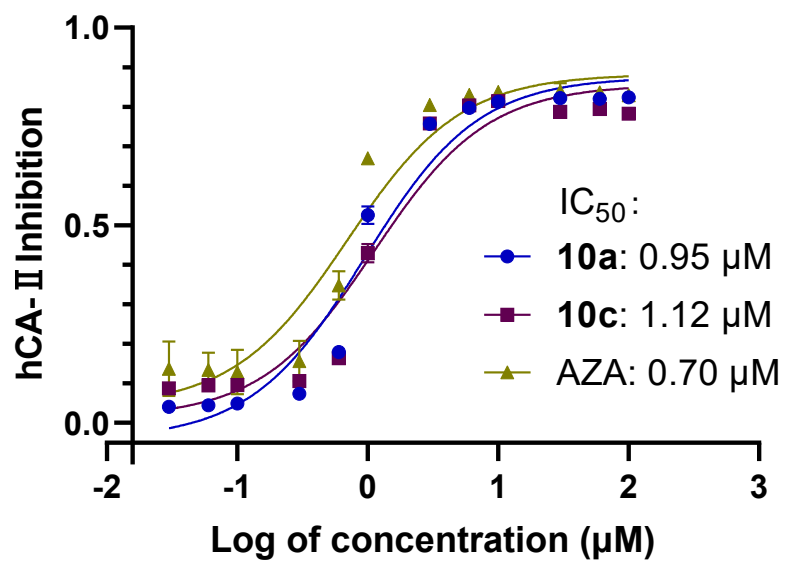

**Figure S22.** Plot of the enzymatic inhibition of hCA-II to catalyse the hydrolysis of *p*-nitrophenyl acetate vs. inhibitor concentration, with the IC<sub>50</sub> shown. Error bars indicate SD,  $n = 3$ .

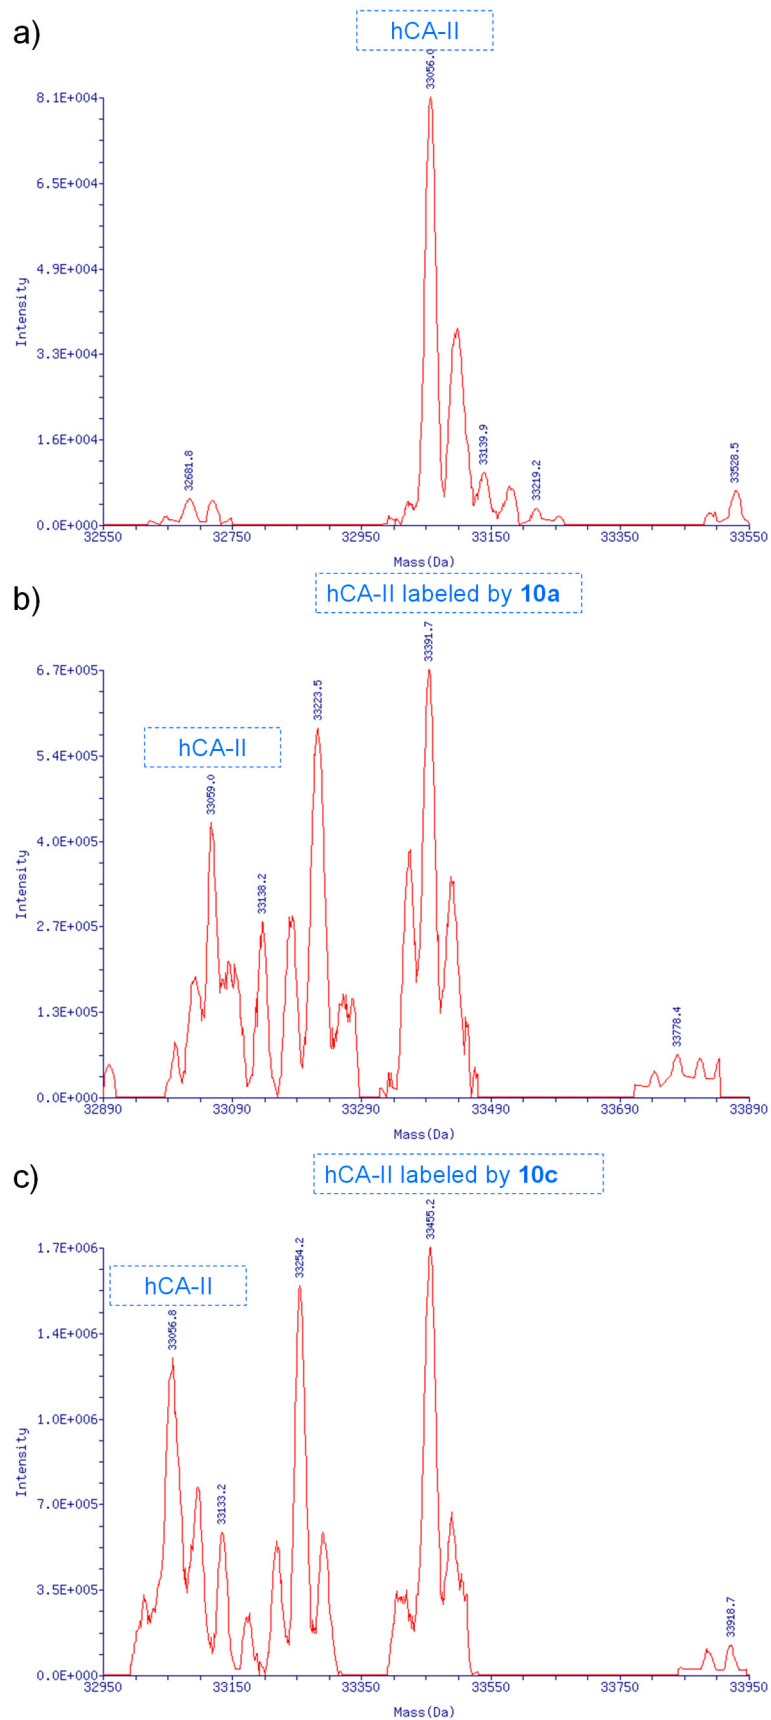

**Figure S23.** The deconvolution MS spectra for the affinity-based labelling of hCA-II (30  $\mu$ M) in PBS (pH = 7.4) by the photo-DAFex reagent: a) blank, b) **10a** (50  $\mu$ M), c) **10c** (50  $\mu$ M).

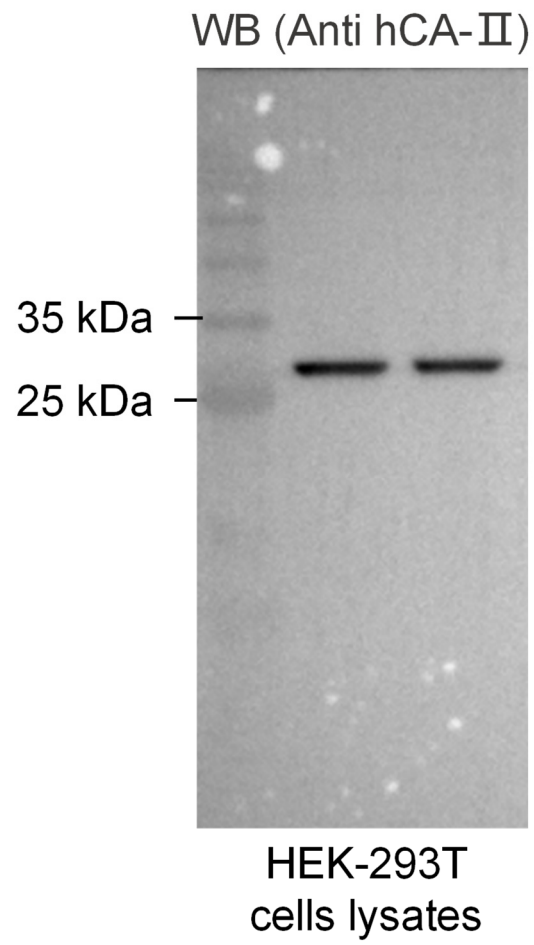

**Figure S24.** Western blot (WB) analysis targeting endogenous hCA-II in living HEK-293T cells lysates,  $n = 2$ .

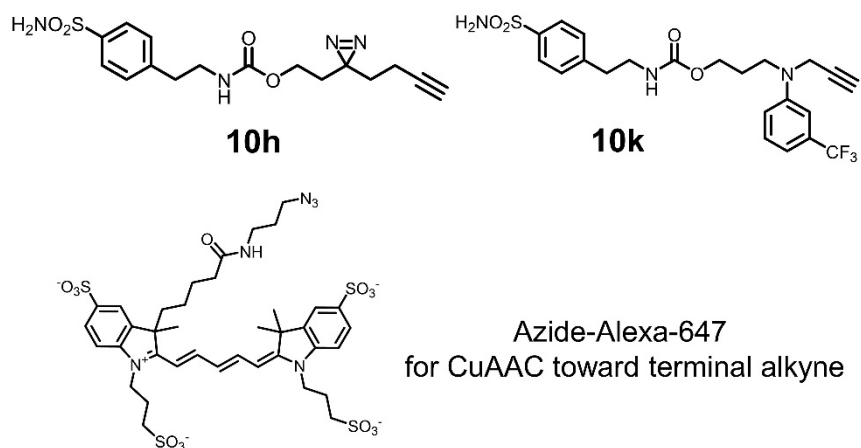

|           |   |            |            |            |            |            |            |
|-----------|---|------------|------------|------------|------------|------------|------------|
| conjugate | - | <b>10h</b> | <b>10h</b> | <b>10h</b> | <b>10k</b> | <b>10k</b> | <b>10k</b> |
| hv        | + | +          | +          | -          | +          | +          | -          |
| AZA       | - | +          | -          | -          | +          | -          | -          |

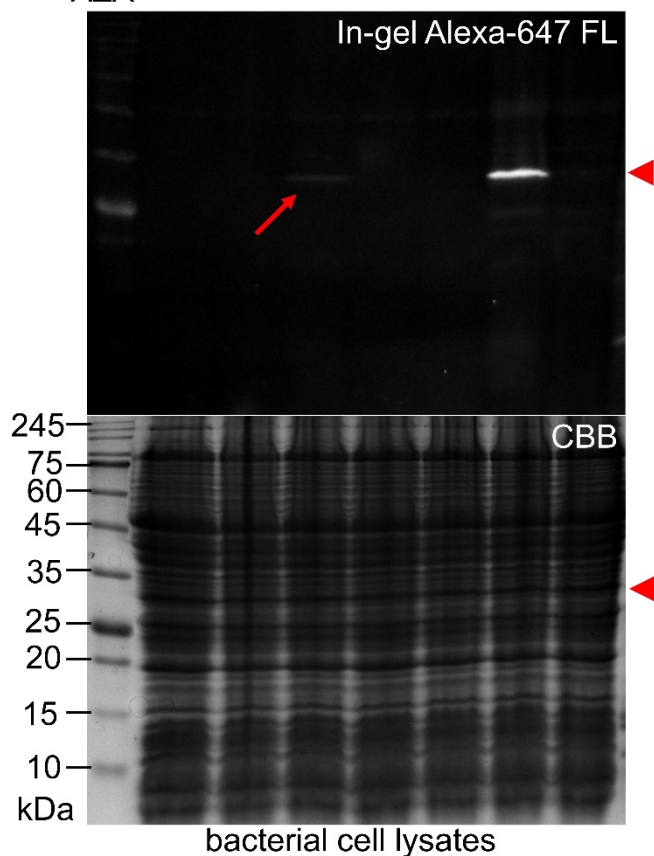

**Figure S25.** Fluorescent photo-labeling of the recombinant hCA-II in *E. coli* lysate via the photo-DAFEx by probe **10h** vs. **10k** (10  $\mu$ M) in the presence/absence of the competitive inhibitor AZA (1.0 mM). In-gel fluorescence imaging was achieved via CuAAC toward the terminal alkyne attached on the hCA-II after PAL with an azide-Alexa-647 conjugate. **10h** in lysate mixture was irradiated with the 365 nm lamp (68 mW cm<sup>-2</sup>) for 180 s; **10k** in lysate mixture was irradiated with the 311 nm lamp (10.8 mW cm<sup>-2</sup>) for 30 s; the groups without irradiation as the negative control were also shown. The red triangles are showing the position for the hCA-II in the resolved SDS-PAGE, and the red arrow represents the fluorescence band for the hCA-II after PAL with the alkyl diazirine probe, **10h**.

**Note S5.** Sequence coverage based on the spliced peptide fragments from the LC-MS/MS analysis, for identification of the PAL sites on proteins by reagent **10a** (The green highlight is the covered peptide sequence, and the potential labeling sites are marked in red colour).

*hCA-II*: 88%

MSHHWGYGKH NGPEHWHKDF PIAKGERQSP VDIDTHTAKY DPSLKPLSVS YDQATSLRIL  
 NNGHAFNVEF DDSQDKAVLK GGPLDGTYRL IQFHFHWGSL DGQGSEHTVD KKKYAAELHL  
 VHWNTKYGDF GKAVQQPDGL AVLGIFLKVG SAKPGLQKVV DVLDSIKTKG KSADFTNFDP  
 RGLLPESLDY WTPGSLTTP PLLECVTWIV LK**EPISVSSE** QVLKFRKLN**F** NGEGEPEELM  
 VDNWRPAQPL KNRQIKASFK LEHHHHHH

**Table S4.** The ion peak analysis based on the LC-MS/MS spectrum for identification of the PAL sites from the digested hCA-II peptide fragment 1.

| #1 | b <sup>+</sup> | b <sup>2+</sup> | Seq.         | y <sup>+</sup> | y <sup>2+</sup> | #2 |
|----|----------------|-----------------|--------------|----------------|-----------------|----|
| 1  | 138.06619      | 69.53673        | H            |                |                 | 15 |
| 2  | 252.10912      | 126.55820       | N            | 2007.91703     | 1004.46215      | 14 |
| 3  | 309.13058      | 155.06893       | G            | 1893.87410     | 947.44069       | 13 |
| 4  | 406.18334      | 203.59531       | P            | 1836.85264     | 918.92996       | 12 |
| 5  | 535.22594      | 268.11661       | E            | 1739.79987     | 870.40357       | 11 |
| 6  | 672.28485      | 336.64606       | H            | 1610.75728     | 805.88228       | 10 |
| 7  | 858.36416      | 429.68572       | W            | 1473.69837     | 737.35282       | 9  |
| 8  | 995.42307      | 498.21517       | H            | 1287.61906     | 644.31317       | 8  |
| 9  | 1455.60111     | 728.30420       | <b>K-10a</b> | 1150.56014     | 575.78371       | 7  |
| 10 | 1570.62806     | 785.81767       | D            | 690.28210      | 345.69469       | 6  |
| 11 | 1717.69647     | 859.35187       | F            | 575.35516      | 288.18122       | 5  |
| 12 | 1814.74923     | 907.87826       | P            | 428.28675      | 214.64701       | 4  |
| 13 | 1927.83330     | 964.42029       | I            | 331.23398      | 166.12063       | 3  |
| 14 | 1998.87041     | 999.93884       | A            | 218.14992      | 109.57860       | 2  |
| 15 |                |                 | K            | 147.11280      | 74.06004        | 1  |

**Table S5.** The ion peak analysis based on the LC-MS/MS spectrum for identification of the PAL sites from the digested hCA-II peptide fragment 2.

| #1 | b <sup>+</sup> | b <sup>2+</sup> | Seq.         | y <sup>+</sup> | y <sup>2+</sup> | #2 |
|----|----------------|-----------------|--------------|----------------|-----------------|----|
| 1  | 100.07569      | 50.54148        | V            |                |                 | 11 |
| 2  | 199.14410      | 100.07569       | V            | 1449.72939     | 725.36834       | 10 |
| 3  | 314.17105      | 157.58916       | D            | 1350.66098     | 675.83413       | 9  |
| 4  | 413.23946      | 207.12337       | V            | 1235.63404     | 618.32066       | 8  |
| 5  | 526.32353      | 263.66540       | L            | 1136.56562     | 568.78645       | 7  |
| 6  | 641.35047      | 321.17887       | D            | 1023.48156     | 512.24442       | 6  |
| 7  | 728.38250      | 364.69489       | S            | 908.45462      | 454.73095       | 5  |
| 8  | 841.46656      | 421.23692       | I            | 821.42259      | 411.21493       | 4  |
| 9  | 1301.64460     | 651.32594       | <b>K-10a</b> | 708.33852      | 354.67290       | 3  |
| 10 | 1402.69228     | 701.84978       | T            | 248.16048      | 124.58388       | 2  |
| 11 |                |                 | K            | 147.11280      | 74.06004        | 1  |

### 3. HPLC-MS analysis and Preparation & Characterizations for the organic compounds

#### General procedure I

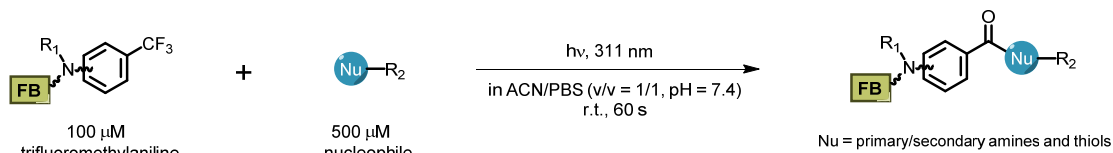

Trifluoromethylaniline derivatives (100  $\mu$ M) and the nucleophile (100  $\mu$ M) were mixed in a total volume of 1.0 mL in ACN/PBS (v/v = 1/1, pH = 7.4) solvent, followed by irradiation with the 311 nm lamp (5.9 mW cm<sup>-2</sup>, single wavelength output after an optical filter) in a quartz test tube ( $\varphi$  = 0.8 cm,  $l$  = 8.0 cm optical path) for 60 s. After further incubation, the samples were collected and analysed by HPLC-MS, and the yields were obtained by external standard calibration.

#### General procedure II

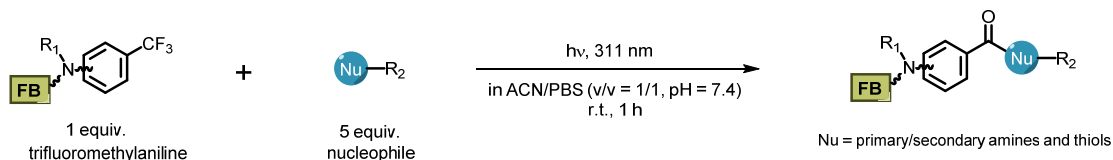

For isolation of the photo-DAFEx products, starting the photo-reaction by dissolving the trifluoromethylaniline derivative (1.0 equiv.) and the nucleophile (5.0 equiv.) in a total volume of 200 mL in ACN/PBS (v/v = 1/1, pH = 7.4) solvent, followed by irradiation with the 311 nm lamp (21.2 mW cm<sup>-2</sup>) in a quartz flask for 1.0 h. The organic solvent was removed under reduced pressure, the aqueous was extracted with DCM for three times. The organic layers were combined, dried over MgSO<sub>4</sub>, and concentrated in vacuo. The crude was purified by flash chromatography to give the desired products, **3aa-3qa**, **3ab-3as**, **4aa-4ai** and **5aa-5ae**.



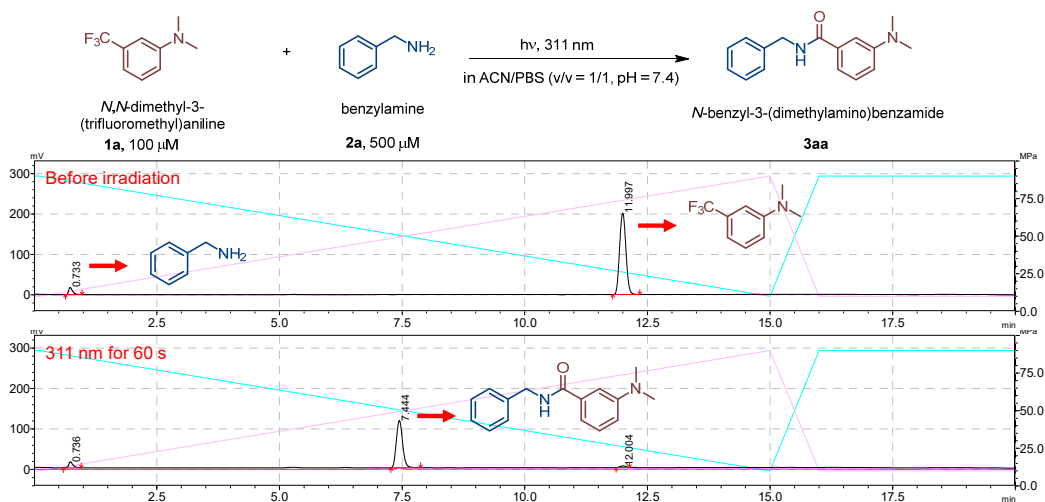

**Figure S26.** HPLC-MS analysis of the photo-DAFEx reaction between **1a** (100  $\mu\text{M}$ ) and **2a** (500  $\mu\text{M}$ ) in ACN/PBS (v/v = 1/1, pH = 7.4) upon 311 nm irradiation according to the **general procedure I**.

### Preparation and characterization

N-benzyl-3-(dimethylamino)benzamide (**3aa**)

**Preparation:** **1a** (26.3 mg, 0.12 mmol) and **2a** (66  $\mu\text{L}$ , 0.60 mmol) in 200 mL mixture of ACN/PBS (v/v = 1/1, pH = 7.4) were performed for the **general procedure II**, and product **3aa** was isolated by flash chromatography (PE : EtOAc = 2 : 1) as a white solid (25.3 mg, 83%).

**$^1\text{H}$  NMR (400 MHz,  $\text{CDCl}_3$ )**  $^1\text{H}$  NMR (400 MHz, Chloroform-*d*)  $\delta$  7.39 – 7.21 (m, 7H), 6.98 (ddd,  $J$  = 7.6, 1.6, 0.9 Hz, 1H), 6.83 (ddd,  $J$  = 8.3, 2.7, 0.8 Hz, 1H), 6.43 (s, 1H), 4.64 (d,  $J$  = 5.7 Hz, 2H), 2.98 (s, 6H).

**$^{13}\text{C}$  NMR (101 MHz,  $\text{CDCl}_3$ )**  $^{13}\text{C}$  NMR (101 MHz,  $\text{CDCl}_3$ )  $\delta$  169.05, 151.72, 138.56, 136.23, 128.73, 127.88, 127.47, 100.59, 99.74, 77.24, 44.05, 40.84.

**HRMS (ESI)** calculated  $\text{C}_{16}\text{H}_{19}\text{N}_2\text{O}^+$   $[\text{M}+\text{H}]^+$   $m/z$  255.1492, found 255.1495.

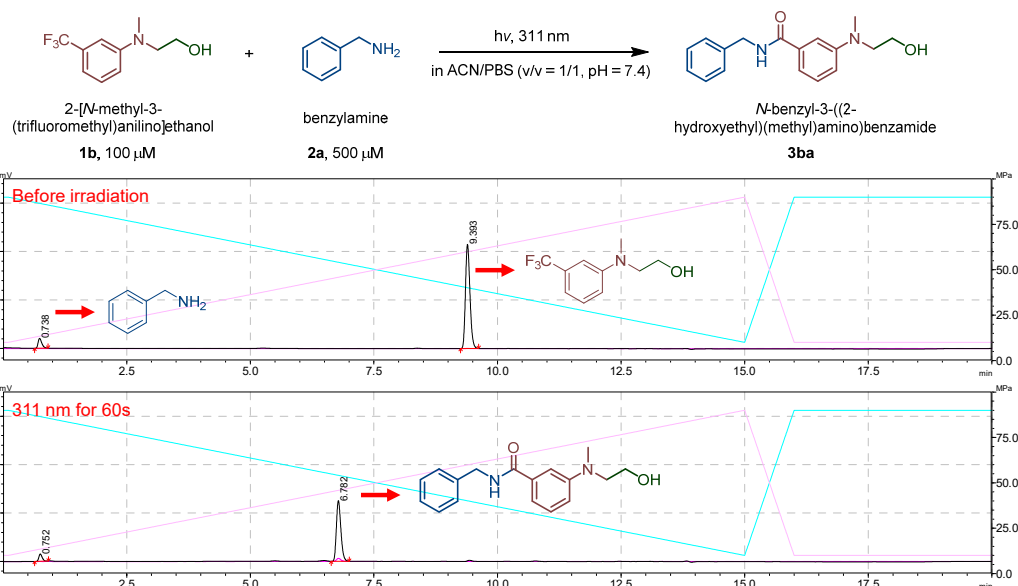

**Figure S27.** HPLC-MS analysis of the photo-DAFEx reaction between **1b** (100  $\mu\text{M}$ ) and **2a** (500  $\mu\text{M}$ ) in ACN/PBS (v/v = 1/1, pH = 7.4) upon 311 nm irradiation according to the **general procedure I**.

### Preparation and characterization

*N*-benzyl-3-((2-hydroxyethyl)(methyl)amino)benzamide (**3ba**).

**Preparation:** **1b** (26.3 mg, 0.12 mmol) and **2a** (66  $\mu\text{L}$ , 0.60 mmol) in 200 mL mixture of ACN/PBS (v/v = 1/1, pH = 7.4) were performed for the **general procedure II**, and **3ba** was isolated by flash chromatography (PE : EtOAc = 2 : 1) as a yellow oil (29.6 mg, 86%).

**$^1\text{H}$  NMR (400 MHz,  $\text{CDCl}_3$ )**  $\delta$  7.30 – 7.22 (m, 5H), 7.20 (dd,  $J$  = 2.6, 1.6 Hz, 1H), 7.17 – 7.10 (m, 1H), 7.05 (t,  $J$  = 5.8 Hz, 1H), 6.98 (dt,  $J$  = 7.8, 1.1 Hz, 1H), 6.78 (ddd,  $J$  = 8.4, 2.6, 0.8 Hz, 1H), 4.51 (d,  $J$  = 5.8 Hz, 2H), 3.66 (t,  $J$  = 6.0 Hz, 2H), 3.39 (t,  $J$  = 6.0 Hz, 2H), 2.88 (s, 3H).

**$^{13}\text{C}$  NMR (101 MHz,  $\text{CDCl}_3$ )**  $\delta$  168.55, 149.90, 138.47, 135.11, 129.29, 128.67, 127.77, 127.41, 115.31, 114.31, 111.30, 59.60, 54.74, 43.96, 38.70.

**HRMS (ESI)** calculated  $\text{C}_{17}\text{H}_{21}\text{N}_2\text{O}_2^+$   $[\text{M}+\text{H}]^+$   $m/z$  285.1598, found 285.1598.

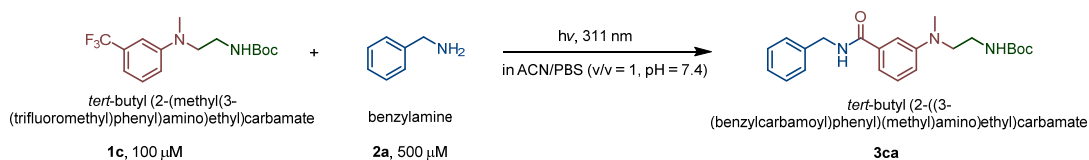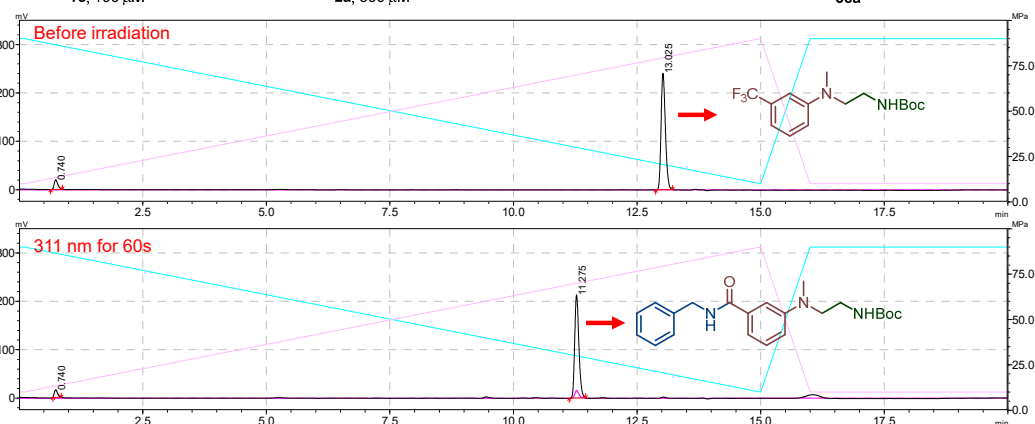

**Figure S28.** HPLC-MS analysis of the photo-DAFEx reaction between **1c** (100  $\mu\text{M}$ ) and **2a** (500  $\mu\text{M}$ ) in ACN/PBS (v/v = 1/1, pH = 7.4) upon 311 nm irradiation according to the **general procedure I**.

### Preparation and characterization

*tert*-butyl 2-((3-(benzylcarbamoyl)phenyl)(methyl)amino)ethylcarbamate (**3ca**).

**Preparation:** **1c** (38.2 mg, 0.12 mmol) and **2a** (66  $\mu\text{L}$ , 0.60 mmol) in 200 mL mixture of ACN/PBS (v/v = 1/1, pH = 7.4) were performed for the **general procedure II**, and **3ca** was isolated by flash chromatography (PE : EtOAc = 2 : 1) as a yellow oil (36.5 mg, 79%).

**$^1\text{H}$  NMR (400 MHz,  $\text{CDCl}_3$ )**  $\delta$  7.42 (s, 1H), 7.38 – 7.29 (m, 4H), 7.28 – 7.21 (m, 2H), 7.15 (d,  $J = 7.6$  Hz, 2H), 6.82 (ddd,  $J = 8.2, 2.6, 0.8$  Hz, 1H), 4.80 (d,  $J = 6.4$  Hz, 1H), 4.65 (d,  $J = 5.8$  Hz, 2H), 3.46 (dd,  $J = 8.2, 6.0$  Hz, 2H), 3.27 (dt,  $J = 8.8, 6.2$  Hz, 2H), 2.99 (s, 3H), 1.39 (s, 9H).

**$^{13}\text{C}$  NMR (101 MHz,  $\text{CDCl}_3$ )**  $\delta$  167.98, 156.25, 149.00, 138.79, 135.21, 129.42, 128.60, 127.70, 127.27, 114.99, 114.90, 110.76, 79.61, 52.07, 43.89, 38.80, 37.37, 28.35.

**HRMS (ESI)** calculated  $\text{C}_{22}\text{H}_{30}\text{N}_3\text{O}_3^+$   $[\text{M}+\text{H}]^+$  m/z 384.2282, found 384.2276.

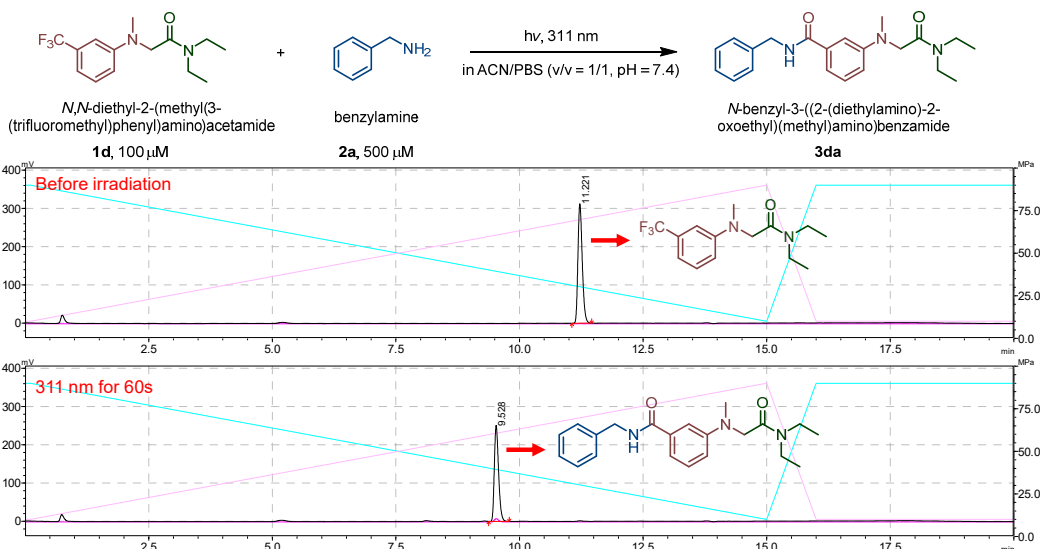

**Figure S29.** HPLC-MS analysis of the photo-DAFEx reaction between **1d** (100  $\mu\text{M}$ ) and **2a** (500  $\mu\text{M}$ ) in ACN/PBS (v/v = 1/1, pH = 7.4) upon 311 nm irradiation according to the **general procedure I**.

### Preparation and characterization

*N*-benzyl-3-((2-(diethylamino)-2-oxoethyl)(methyl)amino)benzamide (**3da**).

**Preparation:** **1d** (34.6 mg, 0.12 mmol) and **2a** (66  $\mu\text{L}$ , 0.60 mmol) in 200 mL mixture of ACN/PBS (v/v = 1/1, pH = 7.4) were performed for the **general procedure II**, and **3da** was isolated by flash chromatography (DCM : MeOH = 10 : 1) as a white solid (34.7 mg, 82%).

**$^1\text{H}$  NMR (400 MHz,  $\text{CDCl}_3$ )**  $\delta$  7.32 (d,  $J$  = 4.4 Hz, 4H), 7.29 – 7.24 (m, 1H), 7.22 – 7.16 (m, 2H), 6.98 (ddd,  $J$  = 7.6, 1.6, 0.8 Hz, 1H), 6.75 (ddd,  $J$  = 8.3, 2.8, 0.9 Hz, 1H), 6.61 (t,  $J$  = 5.8 Hz, 1H), 4.58 (d,  $J$  = 5.7 Hz, 2H), 4.11 (s, 2H), 3.33 (dq,  $J$  = 18.2, 7.1 Hz, 4H), 3.05 (s, 2H), 1.22 (t,  $J$  = 7.1 Hz, 3H), 1.09 (t,  $J$  = 7.1 Hz, 3H).

**$^{13}\text{C}$  NMR (101 MHz,  $\text{CDCl}_3$ )**  $\delta$  168.20, 168.15, 149.79, 138.47, 135.32, 129.25, 128.70, 127.85, 127.45, 115.13, 114.50, 111.39, 53.93, 44.00, 41.20, 40.40, 39.70, 14.35, 13.05.

**HRMS (ESI)** calculated  $\text{C}_{21}\text{H}_{28}\text{N}_3\text{O}_2^+$   $[\text{M}+\text{H}]^+$   $m/z$  354.2176, found 354.2170.

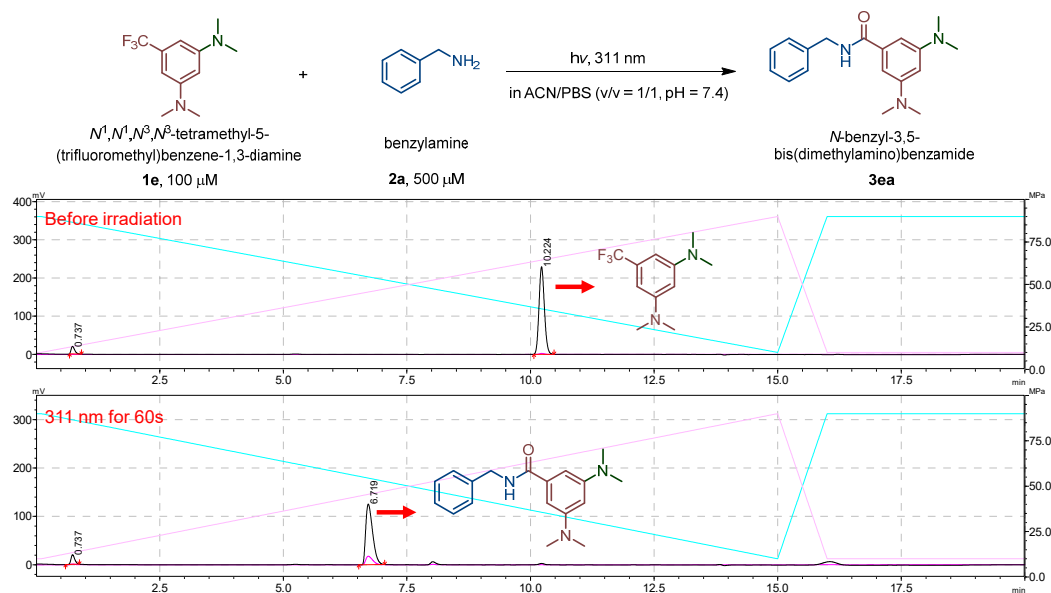

**Figure S30.** HPLC-MS analysis of the photo-DAFEx reaction between **1e** (100  $\mu\text{M}$ ) and **2a** (500  $\mu\text{M}$ ) in ACN/PBS (v/v = 1/1, pH = 7.4) upon 311 nm irradiation according to the **general procedure I**.

### Preparation and characterization

*N*-benzyl-3,5-bis(dimethylamino)benzamide (**3ea**).

**Preparation:** **1e** (27.9 mg, 0.12 mmol) and **2a** (66  $\mu\text{L}$ , 0.60 mmol) in 200 mL mixture of ACN/PBS (v/v = 1/1, pH = 7.4) were performed for the **general procedure II**, and **3ea** was isolated by flash chromatography (PE : EtOAc = 2 : 1) as a white solid (29.2 mg, 82%).

**$^1\text{H}$  NMR (400 MHz,  $\text{CDCl}_3$ )**  $\delta$  7.38 – 7.32 (m, 4H), 7.31 – 7.26 (m, 1H), 6.53 (d,  $J = 2.2$  Hz, 2H), 6.39 (s, 1H), 6.16 (t,  $J = 2.3$  Hz, 1H), 4.65 (d,  $J = 5.7$  Hz, 2H), 2.97 (s, 12H).

**$^{13}\text{C}$  NMR (101 MHz,  $\text{CDCl}_3$ )**  $\delta$  169.06, 151.74, 138.57, 136.24, 128.74, 127.89, 127.48, 100.60, 99.74, 44.04, 40.84.

**HRMS (ESI)** calculated  $\text{C}_{18}\text{H}_{24}\text{N}_3\text{O}^+$   $[\text{M}+\text{H}]^+$   $m/z$  298.1914, found 298.1911.

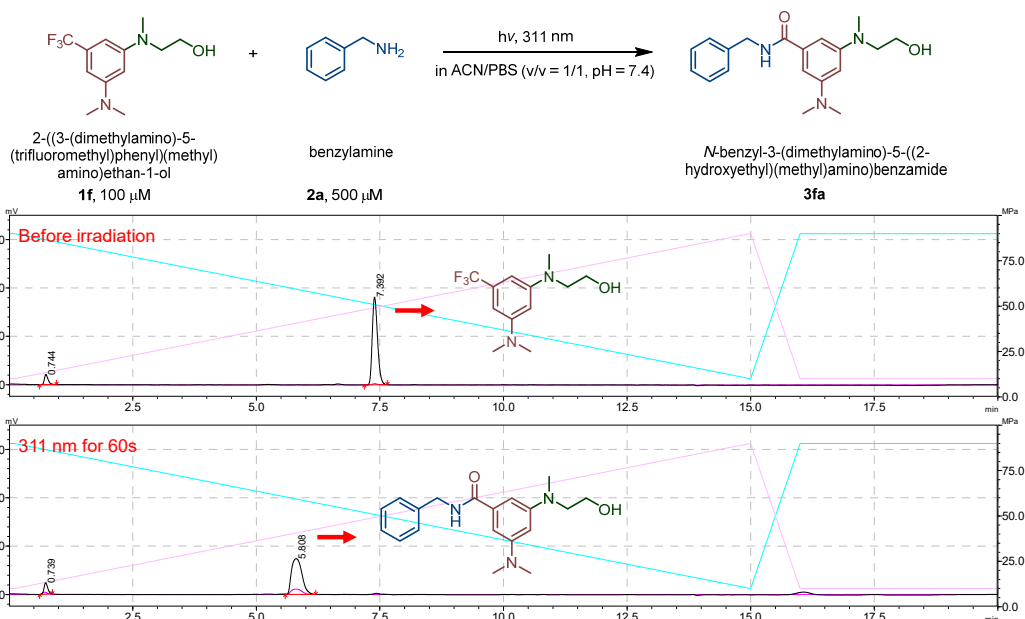

**Figure S31.** HPLC-MS analysis of the photo-DAFEx reaction between **1f** (100  $\mu\text{M}$ ) and **2a** (500  $\mu\text{M}$ ) in ACN/PBS (v/v = 1/1, pH = 7.4) upon 311 nm irradiation according to the **general procedure I**.

### Preparation and characterization

*N*-benzyl-3-(dimethylamino)-5-((2-hydroxyethyl)(methyl)amino)benzamide (**3fa**).

**Preparation:** **1f** (31.5 mg, 0.12 mmol) and **2a** (66  $\mu\text{L}$ , 0.60 mmol) in 200 mL mixture of ACN/PBS (v/v = 1/1, pH = 7.4) were performed for the **general procedure II**, and **3fa** was isolated by flash chromatography (PE : EtOAc = 2 : 1) as a white solid (29.7 mg, 76%).

$^1\text{H NMR}$  (400 MHz,  $\text{CDCl}_3$ )  $\delta$  7.33 – 7.26 (m, 4H), 7.26 – 7.20 (m, 1H), 6.80 (t,  $J = 5.8$  Hz, 1H), 6.59 (dd,  $J = 2.2, 1.4$  Hz, 1H), 6.53 (dd,  $J = 2.2, 1.2$  Hz, 1H), 6.16 (t,  $J = 2.2$  Hz, 1H), 4.56 (d,  $J = 5.8$  Hz, 2H), 3.72 (t,  $J = 5.8$  Hz, 2H), 3.42 (t,  $J = 5.8$  Hz, 2H), 2.92 (s, 9H).

$^{13}\text{C NMR}$  (101 MHz,  $\text{CDCl}_3$ )  $\delta$  169.16, 151.79, 151.08, 138.59, 136.06, 128.66, 127.80, 127.37, 100.85, 100.83, 99.94, 59.89, 55.30, 43.96, 40.79, 38.88.

**HRMS (ESI)** calculated  $\text{C}_{19}\text{H}_{26}\text{N}_3\text{O}_2^+$   $[\text{M}+\text{H}]^+$   $m/z$  328.2020, found 328.2015.

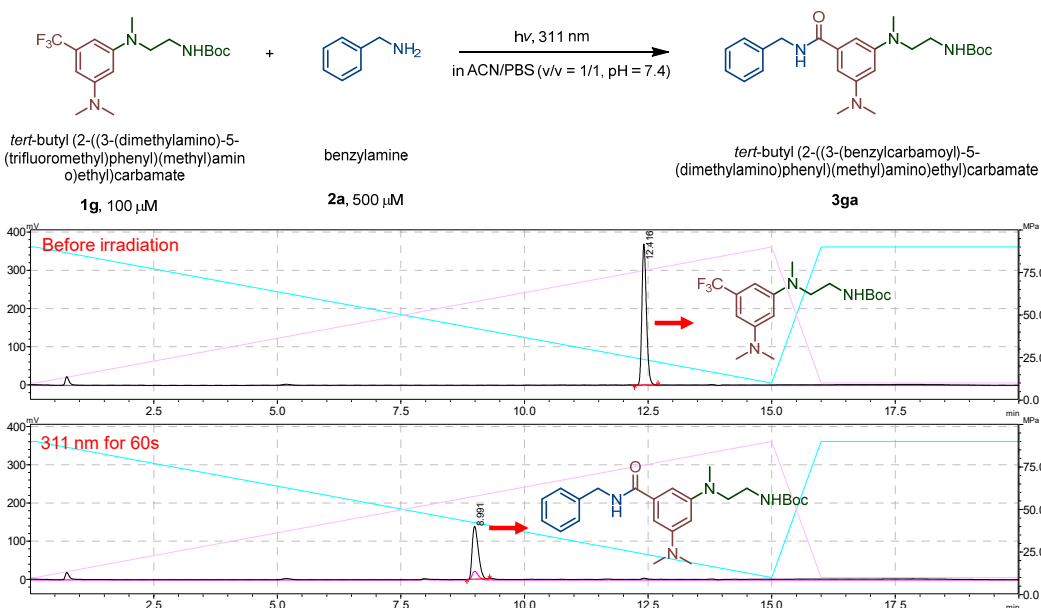

**Figure S32.** HPLC-MS analysis of the photo-DAFEx reaction between **1g** (100  $\mu\text{M}$ ) and **2a** (500  $\mu\text{M}$ ) in ACN/PBS (v/v = 1/1, pH = 7.4) upon 311 nm irradiation according to the **general procedure I**.

### Preparation and characterization

*tert*-butyl 2-((3-(benzylcarbamoyl)-5-(dimethylamino)phenyl)(methyl)amino)ethylcarbamate (**3ga**).

**Preparation:** **1g** (43.3 mg, 0.12 mmol) and **2a** (66  $\mu\text{L}$ , 0.60 mmol) in 200 mL mixture of ACN/PBS (v/v = 1/1, pH = 7.4) were performed for the **general procedure II**, and **3ga** was isolated by flash chromatography (PE : EtOAc = 2 : 1) as a yellow oil (39.6 mg, 77%).

**$^1\text{H}$  NMR (400 MHz,  $\text{CDCl}_3$ )**  $\delta$  7.39 – 7.34 (m, 2H), 7.34 – 7.28 (m, 2H), 7.25 (d,  $J$  = 7.6 Hz, 1H), 7.17 (s, 1H), 6.80 (s, 1H), 6.69 (s, 1H), 6.15 (t,  $J$  = 2.3 Hz, 1H), 4.65 (d,  $J$  = 5.9 Hz, 2H), 3.43 (dd,  $J$  = 8.3, 5.9 Hz, 2H), 3.28 (dt,  $J$  = 8.9, 6.2 Hz, 2H), 2.98 (s, 3H), 2.97 (s, 6H), 1.38 (s, 9H).

**$^{13}\text{C}$  NMR (101 MHz,  $\text{CDCl}_3$ )**  $\delta$  168.74, 156.21, 151.93, 149.95, 138.99, 135.95, 128.55, 127.69, 127.16, 101.24, 100.20, 99.37, 79.55, 52.51, 43.85, 40.83, 38.98, 29.71, 28.34.

**HRMS (ESI)** calculated  $\text{C}_{24}\text{H}_{35}\text{N}_4\text{O}_3^+$   $[\text{M}+\text{H}]^+$   $m/z$  427.2704, found 427.2700.

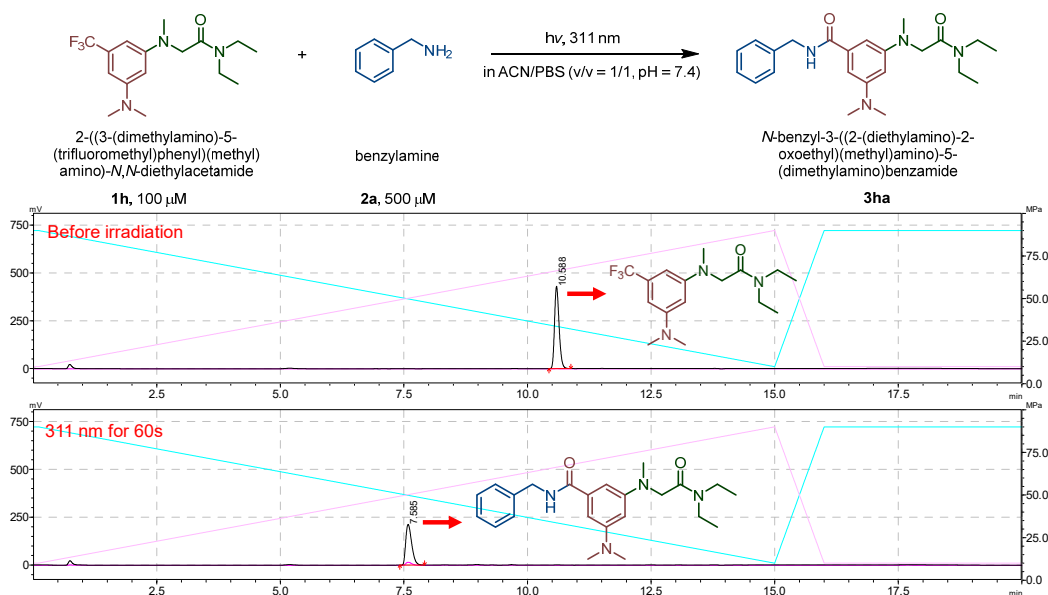

**Figure S33.** HPLC-MS analysis of the photo-DAFEx reaction between **1h** (100  $\mu\text{M}$ ) and **2a** (500  $\mu\text{M}$ ) in ACN/PBS (v/v = 1/1, pH = 7.4) upon 311 nm irradiation according to the **general procedure I**.

### Preparation and characterization

*N*-benzyl-3-((2-(diethylamino)-2-oxoethyl)(methyl)amino)-5-(dimethylamino)benzamide (**3ha**).

**Preparation:** **1h** (39.7 mg, 0.12 mmol) and **2a** (66  $\mu\text{L}$ , 0.60 mmol) in 200 mL mixture of ACN/PBS (v/v = 1/1, pH = 7.4) were performed for the **general procedure II**, and **3ha** was isolated by flash chromatography (DCM : MeOH = 10 : 1) as a white solid (38.5 mg, 81%).

**$^1\text{H}$  NMR (400 MHz,  $\text{CDCl}_3$ )**  $\delta$  7.33 (d,  $J$  = 4.4 Hz, 4H), 7.30 – 7.26 (m, 1H), 6.51 (dd,  $J$  = 2.2, 1.2 Hz, 1H), 6.48 – 6.41 (m, 2H), 6.09 (t,  $J$  = 2.2 Hz, 1H), 4.61 (d,  $J$  = 5.6 Hz, 2H), 4.09 (s, 2H), 3.33 (dq,  $J$  = 14.4, 7.2 Hz, 4H), 3.06 (s, 3H), 2.93 (s, 6H), 1.20 (t,  $J$  = 7.2 Hz, 3H), 1.09 (t,  $J$  = 7.2 Hz, 3H).

**$^{13}\text{C}$  NMR (101 MHz,  $\text{CDCl}_3$ )**  $\delta$  169.13, 168.64, 151.77, 150.61, 138.54, 136.24, 128.69, 127.87, 127.43, 101.02, 100.52, 99.72, 54.69, 44.02, 41.32, 40.77, 40.48, 39.94, 14.36, 13.07.

**HRMS (ESI)** calculated  $\text{C}_{22}\text{H}_{33}\text{N}_4\text{O}_2^+$   $[\text{M}+\text{H}]^+$   $m/z$  397.2598, found 397.2594.



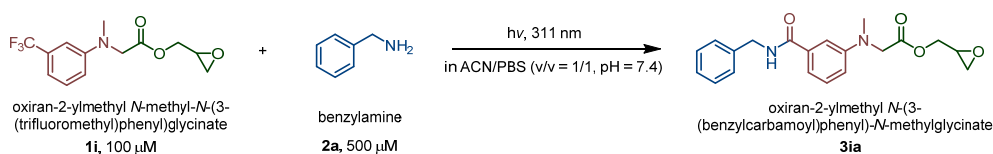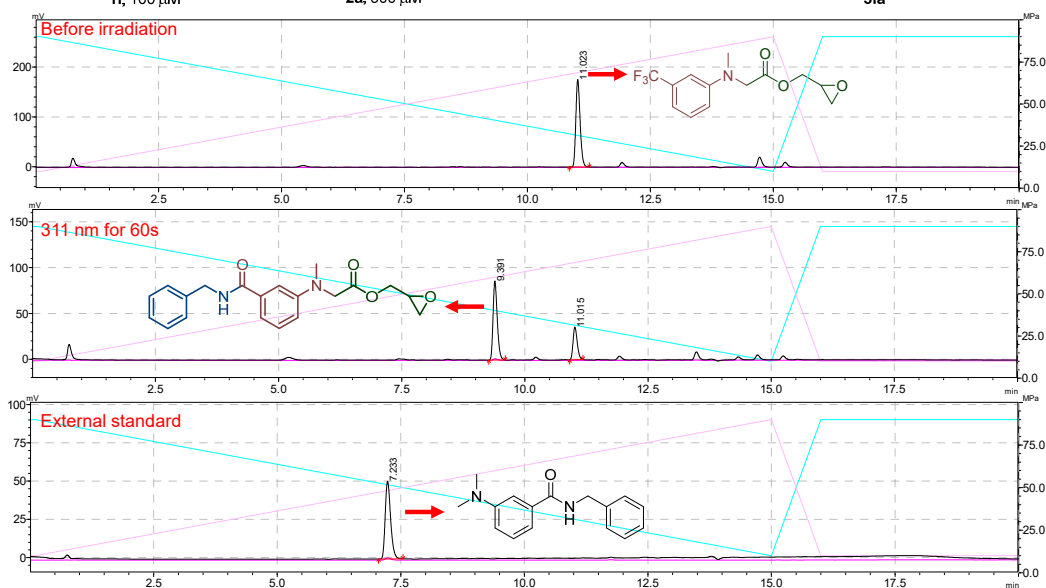

| Item               | Peak No. | Retention Time (min) | Area    |
|--------------------|----------|----------------------|---------|
| Before irradiation | 1        | 11.023               | 1061360 |
| 311 nm for 60 s    | 2        | 9.391                | 510942  |
|                    | 3        | 11.015               | 208757  |
| External standard  | 4        | 7.233                | 385476  |
| HPLC Yield         |          | 66%                  |         |

**Figure S34.** HPLC-MS analysis of the photo-DAFEx reaction between **1c** (100  $\mu\text{M}$ ) and **2a** (500  $\mu\text{M}$ ) in ACN/PBS (v/v = 1/1, pH = 7.4) upon 311 nm irradiation according to the **general procedure I** and the HPLC yield of **3ia** was determined by external standard of *N*-benzyl-3-(dimethylamino)benzamide (**3aa**, 50  $\mu\text{M}$ ).

### Preparation and characterization

oxiran-2-ylmethyl *N*-(3-(benzylcarbamoyl)phenyl)-*N*-methylglycinate (**3ia**).

In attempting to isolate the **3ia**, we found that concentration procedure would lead to ring-opening of the epoxy moiety and even ring-opening substitution reaction with benzylamine, resulting in a messy mixture. Therefore, we were unable to obtain a purely isolated **3ia** for characterization via  $^1\text{H}$  and  $^{13}\text{C}$  NMR.

**HRMS (ESI)** calculated  $\text{C}_{20}\text{H}_{22}\text{N}_2\text{O}_4^+ [\text{M}+\text{H}]^+$  m/z 354.1580, found 354.1586.

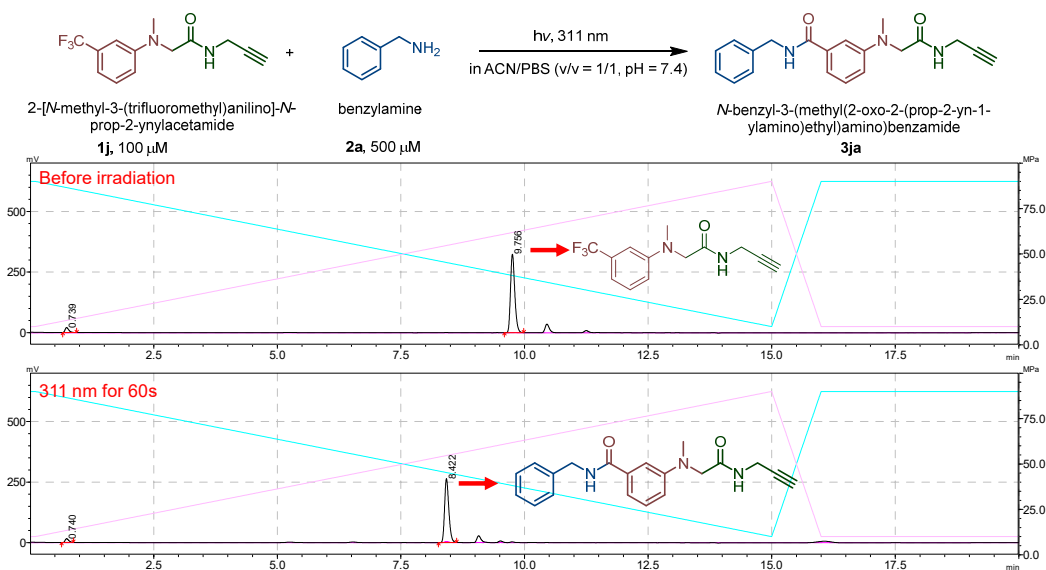

**Figure S35.** HPLC-MS analysis of the photo-DAFEx reaction between **1j** (100  $\mu\text{M}$ ) and **2a** (500  $\mu\text{M}$ ) in ACN/PBS (v/v = 1/1, pH = 7.4) upon 311 nm irradiation according to the **general procedure I**.

### Preparation and characterization

*N*-benzyl-3-(methyl(2-oxo-2-(prop-2-yn-1-ylamino)ethyl)amino)benzamide (**3ja**).

**Preparation:** **1j** (32.4 mg, 0.12 mmol) and **2a** (66  $\mu\text{L}$ , 0.60 mmol) in 200 mL mixture of ACN/PBS (v/v = 1/1, pH = 7.4) were performed for the **general procedure II**, and **3ja** was isolated by flash chromatography (PE : EtOAc = 2 : 1) as a yellow solid (29.8 mg, 70%).

**$^1\text{H}$  NMR (400 MHz, DMSO- $d_6$ )**  $\delta$  8.94 (t,  $J$  = 6.2 Hz, 1H), 8.38 (t,  $J$  = 5.6 Hz, 1H), 7.32 (d,  $J$  = 5.8 Hz, 4H), 7.24 (dq,  $J$  = 8.4, 2.8 Hz, 2H), 7.20 (dd,  $J$  = 7.2, 1.6 Hz, 2H), 6.79 – 6.73 (m, 1H), 4.48 (d,  $J$  = 6.0 Hz, 2H), 3.98 (s, 2H), 3.87 (dd,  $J$  = 5.6, 2.6 Hz, 2H), 3.07 (t,  $J$  = 2.4 Hz, 1H), 3.01 (s, 3H).

**$^{13}\text{C}$  NMR (101 MHz, DMSO- $d_6$ )**  $\delta$  169.95, 167.21, 149.65, 140.34, 135.51, 129.24, 128.73, 127.60, 127.15, 115.58, 115.01, 111.29, 81.63, 73.29, 55.83, 43.03, 39.74, 28.34.

**HRMS (ESI)** calculated  $\text{C}_{20}\text{H}_{22}\text{N}_3\text{O}_2^+$   $[\text{M}+\text{H}]^+$   $m/z$  336.1707, found 336.1700.

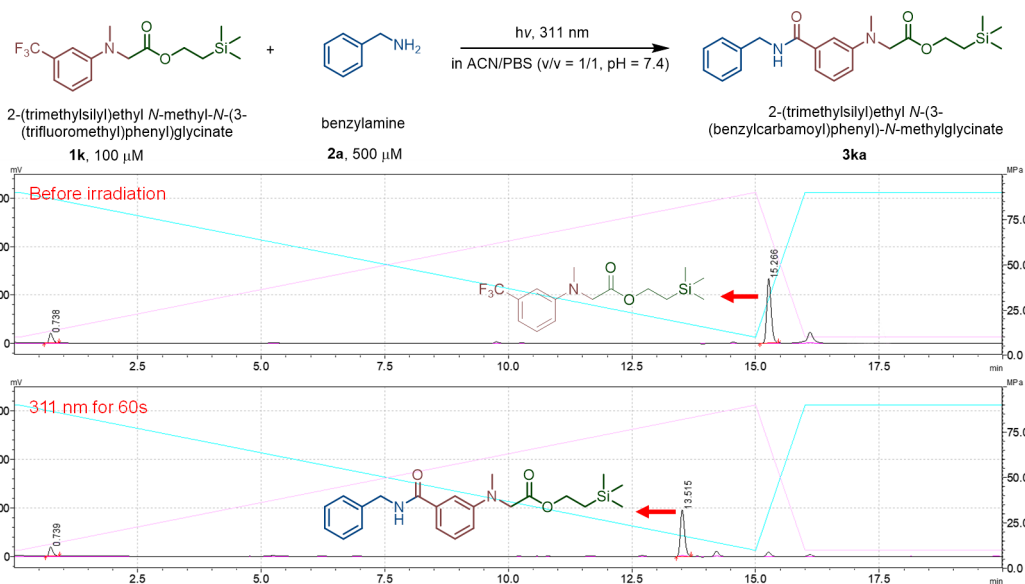

**Figure S36.** HPLC-MS analysis of the photo-DAFEx reaction between **1k** (100  $\mu\text{M}$ ) and **2a** (500  $\mu\text{M}$ ) in ACN/PBS (v/v = 1/1, pH = 7.4) upon 311 nm irradiation according to the **general procedure I**.

### Preparation and characterization

2-(trimethylsilyl)ethyl *N*-(3-(benzylcarbamoyl)phenyl)-*N*-methylglycinate (**3ka**).

**Preparation:** **1k** (40.0 mg, 0.12 mmol) and **2a** (66  $\mu\text{L}$ , 0.60 mmol) in 200 mL mixture of ACN/PBS (v/v = 1/1, pH = 7.4) were performed for the **general procedure II**, and **3ka** was isolated by flash chromatography (PE : EtOAc = 2 : 1) as a yellow solid (35.4 mg, 74%).

**$^1\text{H}$  NMR (400 MHz,  $\text{CDCl}_3$ )**  $\delta$  7.35 (d,  $J$  = 4.4 Hz, 4H), 7.32 – 7.27 (m, 1H), 7.25 – 7.21 (m, 2H), 7.01 (d,  $J$  = 8.2 Hz, 1H), 6.78 (dd,  $J$  = 8.2, 2.8 Hz, 1H), 6.41 (d,  $J$  = 6.0 Hz, 1H), 4.63 (d,  $J$  = 5.6 Hz, 2H), 4.24 – 4.16 (m, 2H), 4.08 (s, 2H), 3.09 (s, 3H), 1.02 – 0.94 (m, 2H), 0.02 (s, 9H).

**$^{13}\text{C}$  NMR (101 MHz,  $\text{CDCl}_3$ )**  $\delta$  172.27, 169.50, 150.78, 139.86, 136.96, 130.81, 130.29, 129.41, 129.08, 116.60, 116.25, 112.94, 64.92, 55.88, 45.63, 41.07, 18.96, 0.00.

**HRMS (ESI)** calculated  $\text{C}_{22}\text{H}_{31}\text{N}_2\text{O}_3\text{Si}^+$   $[\text{M}+\text{H}]^+$  m/z 399.2098, found 399.2089.

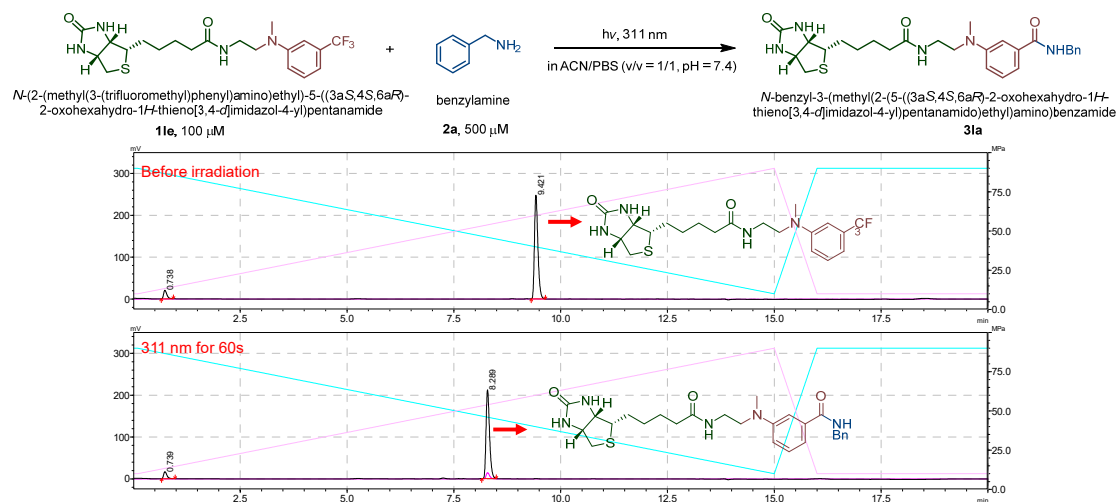

**Figure S37.** HPLC-MS analysis of the photo-DAFEx reaction between **11** (100  $\mu$ M) and **2a** (500  $\mu$ M) in ACN/PBS (v/v = 1/1, pH = 7.4) upon 311 nm irradiation according to the **general procedure I**.

### Preparation and characterization

2-(trimethylsilyl)ethyl *N*-(3-(benzylcarbamoyl)phenyl)-*N*-methylglycinate (**31a**).

**Preparation:** **11** (53.3 mg, 0.12 mmol) and **2a** (66  $\mu$ L, 0.60 mmol) in 200 mL mixture of ACN/PBS (v/v = 1/1, pH = 7.4) were performed for the **general procedure II**, and **31a** was isolated by flash chromatography (DCM : MeOH = 10 : 1) as a yellow solid (50.2 mg, 82%).

**<sup>1</sup>H NMR (400 MHz, DMSO-*d*<sub>6</sub>)**  $\delta$  8.93 (t,  $J$  = 6.1 Hz, 1H), 7.92 (t,  $J$  = 5.8 Hz, 1H), 7.35 – 7.29 (m, 4H), 7.26 – 7.21 (m, 3H), 7.13 (dt,  $J$  = 7.5, 1.1 Hz, 1H), 6.88 (dd,  $J$  = 8.1, 2.2 Hz, 1H), 6.39 (dt,  $J$  = 22.2, 1.7 Hz, 2H), 4.47 (d,  $J$  = 6.0 Hz, 2H), 4.29 (ddt,  $J$  = 6.4, 5.3, 1.1 Hz, 1H), 4.10 (ddd,  $J$  = 7.8, 4.4, 1.9 Hz, 1H), 3.40 (t,  $J$  = 6.8 Hz, 2H), 3.21 (q,  $J$  = 6.4 Hz, 2H), 3.06 (ddd,  $J$  = 8.6, 6.1, 4.3 Hz, 1H), 2.93 (s, 3H), 2.81 (dd,  $J$  = 12.4, 5.1 Hz, 1H), 2.57 (d,  $J$  = 12.4 Hz, 1H), 2.02 (t,  $J$  = 7.4 Hz, 2H), 1.71 – 1.38 (m, 4H), 1.32 – 1.23 (m, 2H).

**<sup>13</sup>C NMR (101 MHz, DMSO-*d*<sub>6</sub>)**  $\delta$  172.87, 167.30, 163.20, 149.32, 140.35, 135.59, 129.36, 128.72, 128.15, 127.64, 114.97, 114.88, 110.83, 61.50, 59.67, 55.86, 51.36, 43.05, 40.31, 38.61, 36.28, 35.68, 28.68, 28.49, 25.58.

**HRMS (ESI)** calculated C<sub>27</sub>H<sub>36</sub>N<sub>5</sub>O<sub>3</sub>S<sup>+</sup> [M+H]<sup>+</sup> m/z 510.2533, found 510.2528.

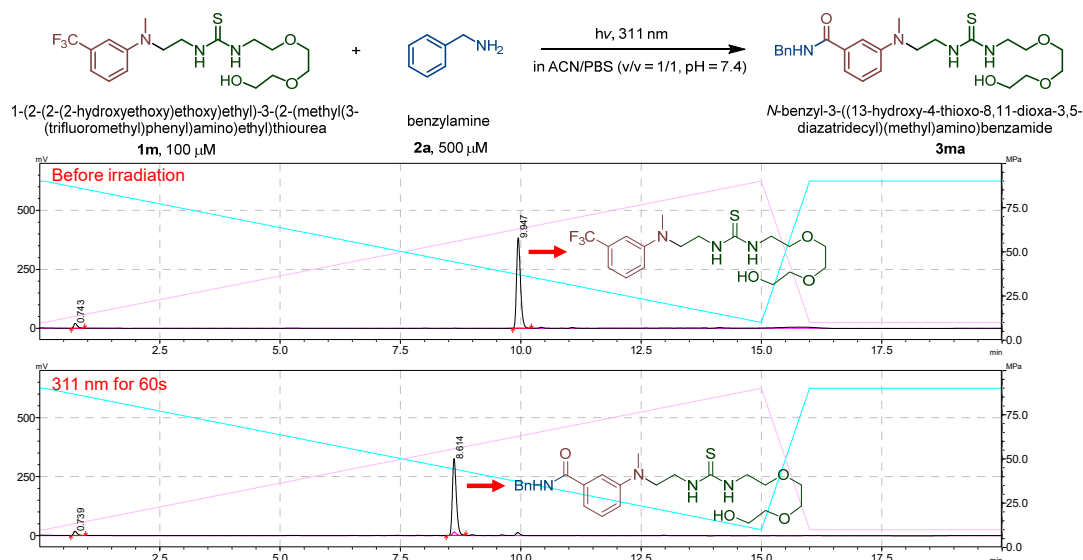

**Figure S38.** HPLC-MS analysis of the photo-DAFEx reaction between **1m** (100  $\mu\text{M}$ ) and **2a** (500  $\mu\text{M}$ ) in ACN/PBS (v/v = 1/1, pH = 7.4) upon 311 nm irradiation according to the **general procedure I**.

### Preparation and characterization

N-benzyl-3-((13-hydroxy-4-thioxo-8,11-dioxo-3,5-diazatridecyl)(methyl)amino)benzamide (**3ma**).

**Preparation:** **1m** (49.1 mg, 0.12 mmol) and **2a** (66  $\mu\text{L}$ , 0.60 mmol) in 200 mL mixture of ACN/PBS (v/v = 1/1, pH = 7.4) were performed for the **general procedure II**, and **3ma** was isolated by flash chromatography (DCM : MeOH = 10 : 1) as a yellow oil (46.0 mg, 81%).

**$^1\text{H}$  NMR (400 MHz, DMSO- $d_6$ )**  $\delta$  8.88 (t,  $J$  = 6.2 Hz, 1H), 7.59 (s, 1H), 7.56 – 7.49 (m, 1H), 7.35 – 7.29 (m, 4H), 7.26 – 7.19 (m, 3H), 7.13 (dt,  $J$  = 7.6, 1.2 Hz, 1H), 6.96 (dd,  $J$  = 8.2, 2.6 Hz, 1H), 4.60 (t,  $J$  = 5.4 Hz, 1H), 4.47 (d,  $J$  = 6.0 Hz, 2H), 3.55 – 3.45 (m, 12H), 3.41 (dd,  $J$  = 5.4, 4.4 Hz, 2H), 2.95 (s, 3H).

**$^{13}\text{C}$  NMR (101 MHz, DMSO- $d_6$ )**  $\delta$  167.32, 149.43, 140.34, 135.65, 129.35, 128.72, 127.64, 127.13, 115.05, 110.81, 72.81, 70.18, 70.11, 69.38, 60.68, 51.08, 43.03, 38.56.

**HRMS (ESI)** calculated  $\text{C}_{24}\text{H}_{35}\text{N}_4\text{O}_4\text{S}^+$   $[\text{M}+\text{H}]^+$  m/z 475.2374, found 475.2369.

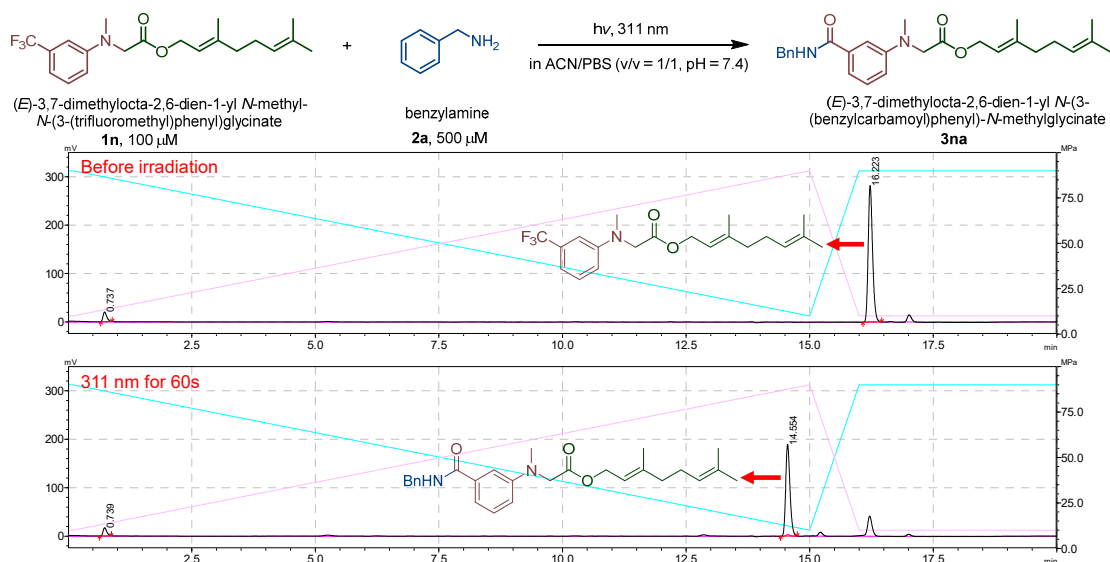

**Figure S39.** HPLC-MS analysis of the photo-DAFEx reaction between **1n** (100  $\mu\text{M}$ ) and **2a** (500  $\mu\text{M}$ ) in ACN/PBS (v/v = 1/1, pH = 7.4) upon 311 nm irradiation according to the **general procedure I**.

### Preparation and characterization

(*E*)-3,7-dimethylocta-2,6-dien-1-yl *N*-(3-(benzylcarbamoyl)phenyl)-*N*-methylglycinate (**3na**).

**Preparation:** **1n** (44.3 mg, 0.12 mmol) and **2a** (66  $\mu\text{L}$ , 0.60 mmol) in 200 mL mixture of ACN/PBS (v/v = 1/1, pH = 7.4) were performed for the **general procedure II**, and **3na** was isolated by flash chromatography (PE : EtOH = 2 : 1) as a yellow oil (47.0 mg, 90%).

**$^1\text{H NMR}$  (400 MHz,  $\text{CDCl}_3$ )**  $\delta$  7.34 (d,  $J = 4.4$  Hz, 4H), 7.31 – 7.27 (m, 1H), 7.25 – 7.20 (m, 2H), 7.02 (dt,  $J = 7.8, 1.2$  Hz, 1H), 6.78 (ddd,  $J = 8.2, 2.8, 0.8$  Hz, 1H), 6.47 (t,  $J = 5.8$  Hz, 1H), 5.31 (ddq,  $J = 7.0, 5.6, 1.3$  Hz, 1H), 5.07 (tdd,  $J = 6.6, 3.0, 1.4$  Hz, 1H), 4.63 (d,  $J = 2.0$  Hz, 2H), 4.62 (s, 2H), 4.10 (s, 2H), 3.08 (s, 3H), 2.14 – 1.95 (m, 4H), 1.67 (dd,  $J = 7.4, 1.4$  Hz, 6H), 1.60 (d,  $J = 1.4$  Hz, 3H).

**$^{13}\text{C NMR}$  (101 MHz,  $\text{CDCl}_3$ )**  $\delta$  170.58, 167.98, 149.25, 142.94, 138.38, 135.45, 131.87, 129.27, 128.75, 127.88, 127.53, 123.72, 117.87, 115.11, 114.81, 111.49, 61.86, 54.26, 44.09, 39.54, 39.51, 26.29, 25.71, 17.73, 16.50.

**HRMS (ESI)** calculated  $\text{C}_{27}\text{H}_{35}\text{N}_2\text{O}_3^+$   $[\text{M}+\text{H}]^+$   $m/z$  435.2642, found 435.2646.

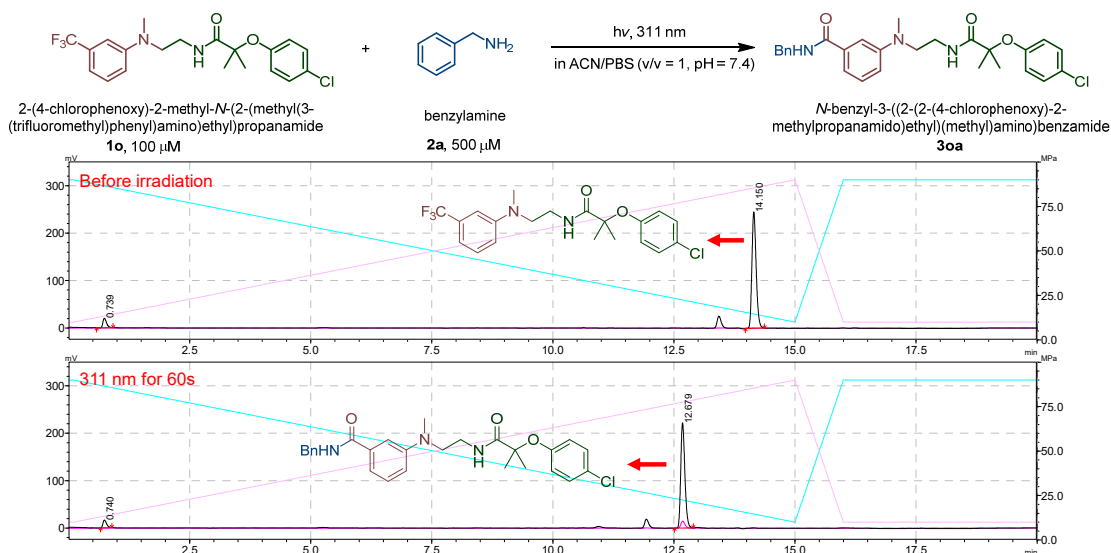

**Figure S40.** HPLC-MS analysis of the photo-DAFex reaction between **1o** (100  $\mu\text{M}$ ) and **2a** (500  $\mu\text{M}$ ) in ACN/PBS (v/v = 1/1, pH = 7.4) upon 311 nm irradiation according to the **general procedure I**.

### Preparation and characterization

N-benzyl-3-((2-(2-(4-chlorophenoxy)-2-methylpropanamido)ethyl)(methyl)amino)benzamide (**3oa**)

**Preparation:** **1o** (49.7 mg, 0.12 mmol) and **2a** (66  $\mu\text{L}$ , 0.60 mmol) in 200 mL mixture of ACN/PBS (v/v = 1/1, pH = 7.4) were performed for the **general procedure II**, and **3oa** was isolated by flash chromatography (PE : EtOH = 2 : 1) as a yellow oil (46.4 mg, 81%).

**$^1\text{H NMR}$  (400 MHz,  $\text{CDCl}_3$ )**  $\delta$  7.44 (dd,  $J = 2.6, 1.6$  Hz, 1H), 7.39 – 7.35 (m, 2H), 7.32 (ddd,  $J = 7.8, 6.8, 0.8$  Hz, 2H), 7.29 – 7.23 (m, 2H), 7.20 (d,  $J = 2.2$  Hz, 1H), 7.19 (d,  $J = 2.2$  Hz, 1H), 7.14 (ddd,  $J = 7.4, 1.6, 0.8$  Hz, 1H), 7.11 – 7.05 (m, 1H), 6.93 (d,  $J = 6.4$  Hz, 1H), 6.83 (ddd,  $J = 8.4, 2.6, 0.8$  Hz, 1H), 6.78 (d,  $J = 2.2$  Hz, 1H), 6.76 (d,  $J = 2.2$  Hz, 1H), 4.65 (d,  $J = 5.8$  Hz, 2H), 3.54 – 3.46 (m, 4H), 2.99 (s, 3H), 1.38 (s, 6H).

**$^{13}\text{C NMR}$  (101 MHz,  $\text{CDCl}_3$ )**  $\delta$  175.07, 167.79, 152.56, 149.02, 138.71, 135.32, 129.47, 129.26, 128.73, 128.63, 127.94, 127.37, 122.87, 115.03, 114.96, 110.99, 81.89, 51.40, 44.05, 38.63, 36.54, 24.83.

**HRMS (ESI)** calculated  $\text{C}_{27}\text{H}_{31}\text{ClN}_3\text{O}_3^+$   $[\text{M}+\text{H}]^+$  m/z 480.2048, found 480.2046.

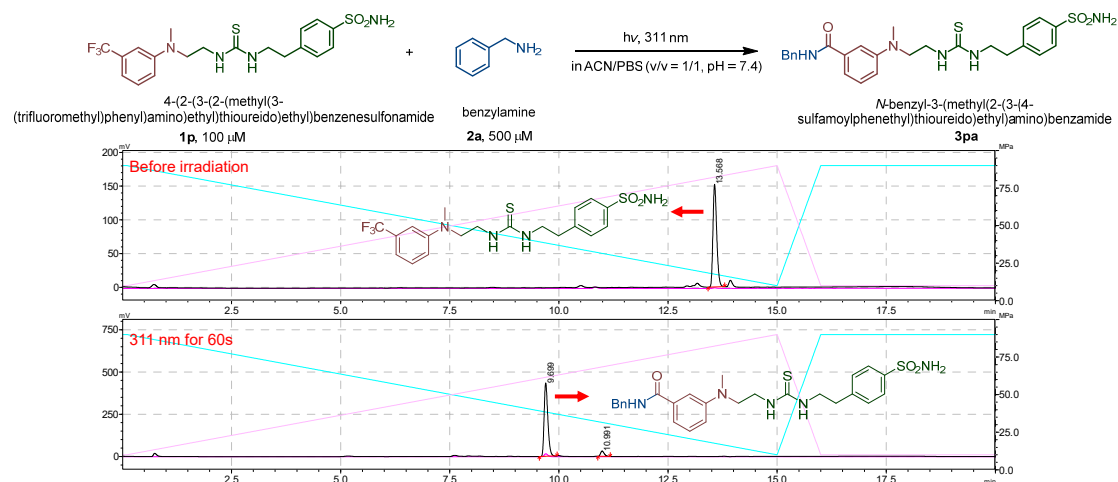

**Figure S41.** HPLC-MS analysis of the photo-DAFEx reaction between **1p** (100  $\mu\text{M}$ ) and **2a** (500  $\mu\text{M}$ ) in ACN/PBS (v/v = 1/1, pH = 7.4) upon 311 nm irradiation according to the **general procedure I**.

### Preparation and characterization

*N*-benzyl-3-(methyl(2-(3-(4-sulfamoylphenethyl)thioureido)ethyl)amino)benzamide (**3pa**).

**Preparation:** **1p** (55.2 mg, 0.12 mmol) and **2a** (66  $\mu\text{L}$ , 0.60 mmol) in 200 mL mixture of ACN/PBS (v/v = 1/1, pH = 7.4) were performed for the **general procedure II**, and **3pa** was isolated by flash chromatography (DCM : MeOH = 10 : 1) as a yellow solid (53.3 mg, 85%).

**$^1\text{H NMR}$  (400 MHz, DMSO- $d_6$ )**  $\delta$  8.88 (t,  $J$  = 6.2 Hz, 1H), 7.76 (d,  $J$  = 1.8 Hz, 1H), 7.74 (d,  $J$  = 1.8 Hz, 1H), 7.53 (d,  $J$  = 14.2 Hz, 2H), 7.41 (d,  $J$  = 1.8 Hz, 1H), 7.39 (d,  $J$  = 1.8 Hz, 1H), 7.34 – 7.28 (m, 6H), 7.27 – 7.19 (m, 3H), 7.14 (dt,  $J$  = 7.6, 1.2 Hz, 1H), 7.03 – 6.93 (m, 1H), 4.47 (d,  $J$  = 6.0 Hz, 2H), 3.72 – 3.42 (m, 6H), 2.95 (s, 3H), 2.87 (t,  $J$  = 7.6 Hz, 2H).

**$^{13}\text{C NMR}$  (101 MHz, DMSO- $d_6$ )**  $\delta$  167.35, 149.42, 144.04, 142.55, 140.33, 135.67, 129.59, 129.36, 128.73, 127.63, 127.14, 126.18, 115.03, 110.81, 51.05, 43.04, 38.57, 34.99, 29.49, 22.57.

**HRMS (ESI)** calculated  $\text{C}_{26}\text{H}_{32}\text{N}_5\text{O}_3\text{S}_2^+$   $[\text{M}+\text{H}]^+$   $m/z$  526.1941, found 526.1938.



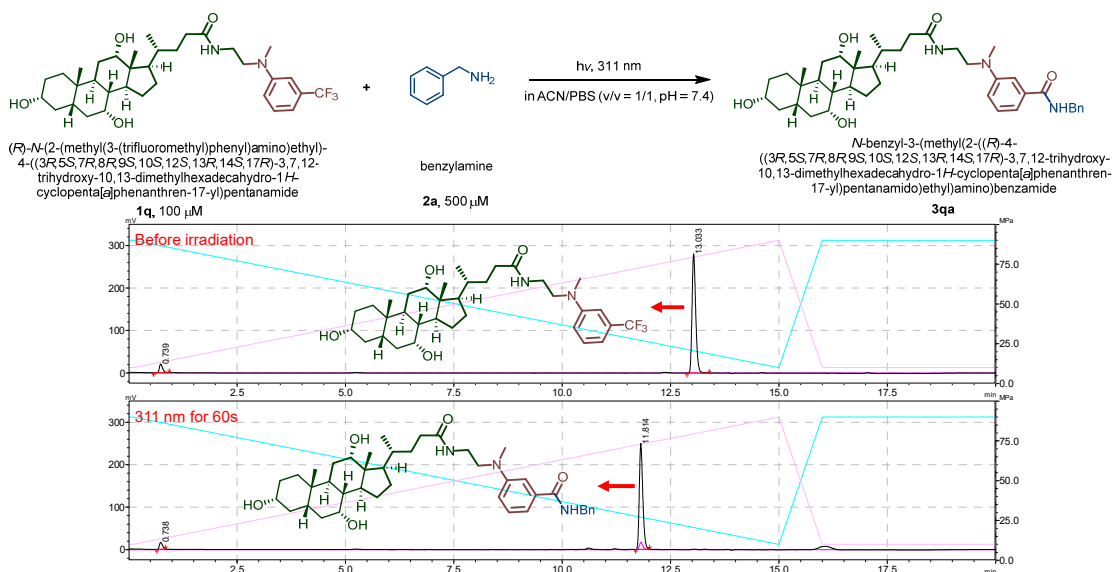

**Figure S42.** HPLC-MS analysis of the photo-DAFEx reaction between **1q** (100 μM) and **2a** (500 μM) in ACN/PBS (v/v = 1/1, pH = 7.4) upon 311 nm irradiation according to the **general procedure I**.

### Preparation and characterization

N-benzyl-3-(methyl(2-((S)-4-((3S,5R,7S,8S,9R,10R,12R,13S,14R,17S)-3,7,12-trihydroxy-10,13-dimethylhexadecahydro-1H-cyclopenta[a]phenanthren-17-yl)pentanamido)ethyl)amino)benzamide (**3qa**).

**Preparation:** **1q** (73.0 mg, 0.12 mmol) and **2a** (66 μL, 0.60 mmol) in 200 mL mixture of ACN/PBS (v/v = 1/1, pH = 7.4) were performed for the **general procedure II**, and **3qa** was isolated by flash chromatography (DCM : MeOH = 10 : 1) as a white solid (49.8 mg, 62%).

**<sup>1</sup>H NMR (400 MHz, DMSO-*d*<sub>6</sub>)** δ 8.91 (t, *J* = 6.1 Hz, 1H), 7.90 (t, *J* = 5.8 Hz, 1H), 7.35 – 7.29 (m, 4H), 7.26 – 7.19 (m, 3H), 7.13 (dt, *J* = 7.6, 1.1 Hz, 1H), 6.87 (dd, *J* = 8.1, 2.2 Hz, 1H), 4.47 (d, *J* = 6.0 Hz, 2H), 4.33 (d, *J* = 4.3 Hz, 1H), 4.09 (d, *J* = 3.6 Hz, 1H), 4.00 (d, *J* = 3.4 Hz, 1H), 3.77 (q, *J* = 3.1 Hz, 1H), 3.61 (t, *J* = 3.3 Hz, 1H), 3.40 (d, *J* = 6.9 Hz, 2H), 3.20 (q, *J* = 5.2, 4.2 Hz, 3H), 2.93 (s, 3H), 2.28 – 1.86 (m, 4H), 1.83 – 1.55 (m, 4H), 1.49 – 1.08 (m, 8H), 1.02 – 0.78 (m, 7H), 0.57 (s, 3H).

**<sup>13</sup>C NMR (101 MHz, DMSO-*d*<sub>6</sub>)** δ 173.51, 167.29, 149.27, 140.34, 135.59, 129.35, 128.72, 127.64, 127.13, 114.96, 114.86, 110.80, 71.48, 70.92, 66.72, 51.39, 46.56, 46.20, 43.05, 41.99, 41.83, 38.69, 36.30, 35.78, 35.60, 35.36, 34.86, 32.96, 32.04, 30.87, 29.03, 27.74, 26.68, 23.28, 23.10, 17.58, 12.82.

**HRMS (ESI)** calculated C<sub>41</sub>H<sub>60</sub>N<sub>3</sub>O<sub>5</sub><sup>+</sup> [M+H]<sup>+</sup> *m/z* 674.4527, found 674.4517.

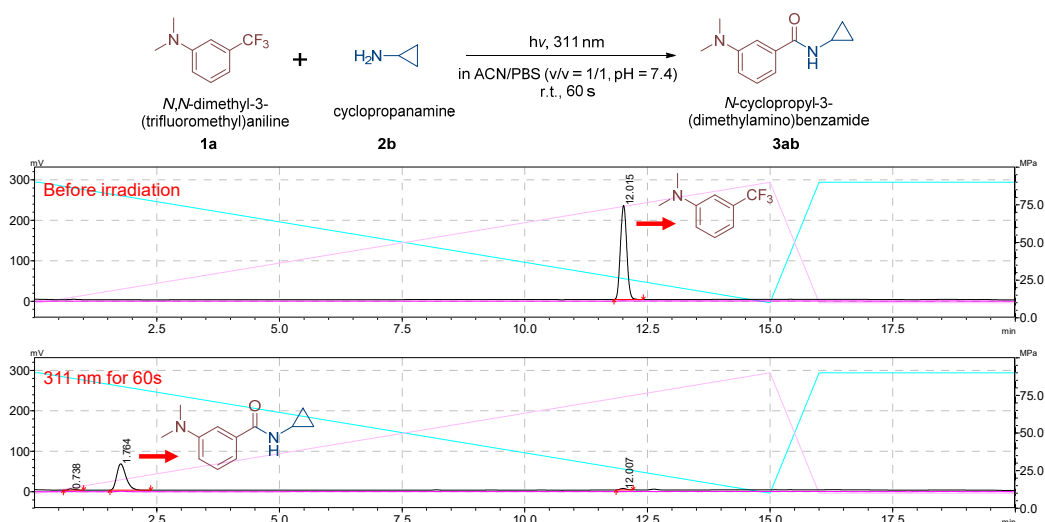

**Figure S43.** HPLC-MS analysis of the photo-DAFEx reaction between **1a** (100  $\mu\text{M}$ ) and **2b** (500  $\mu\text{M}$ ) in ACN/PBS ( $v/v = 1/1$ ,  $\text{pH} = 7.4$ ) upon 311 nm irradiation according to the **general procedure I**.

### Preparation and characterization

#### *N*-cyclopropyl-3-(dimethylamino)benzamide (**3ab**)

**Preparation:** **1a** (31.0 mg, 0.16 mmol) and **2b** (46.8 mg, 0.82 mmol) in 200 mL mixture of ACN/PBS ( $v/v = 1/1$ ,  $\text{pH} = 7.4$ ) were performed for the **general procedure II**, and **3ab** was isolated by flash chromatography (DCM : MeOH = 10 : 1) as a white solid (27.5 mg, 82%);

$^1\text{H NMR}$  (400 MHz,  $\text{CDCl}_3$ )  $\delta$  7.23 – 7.18 (m, 1H), 7.17 (dd,  $J = 2.8, 1.6$  Hz, 1H), 6.92 (d,  $J = 7.6$  Hz, 1H), 6.80 (dd,  $J = 8.2, 2.6$  Hz, 1H), 6.38 (s, 1H), 2.96 (s, 6H), 2.88 (m, 1H), 0.83 (m, 2H), 0.63 – 0.57 (m, 2H).

$^{13}\text{C NMR}$  (101 MHz,  $\text{CDCl}_3$ )  $\delta$  169.77, 150.70, 135.32, 129.05, 115.18, 113.90, 111.26, 77.39, 77.08, 76.76, 40.49, 23.13, 6.74.

**HRMS (ESI)** calculated  $\text{C}_{12}\text{H}_{17}\text{N}_2\text{O}^+$   $[\text{M}+\text{H}]^+$   $m/z$  205.1335, found 205.1333.

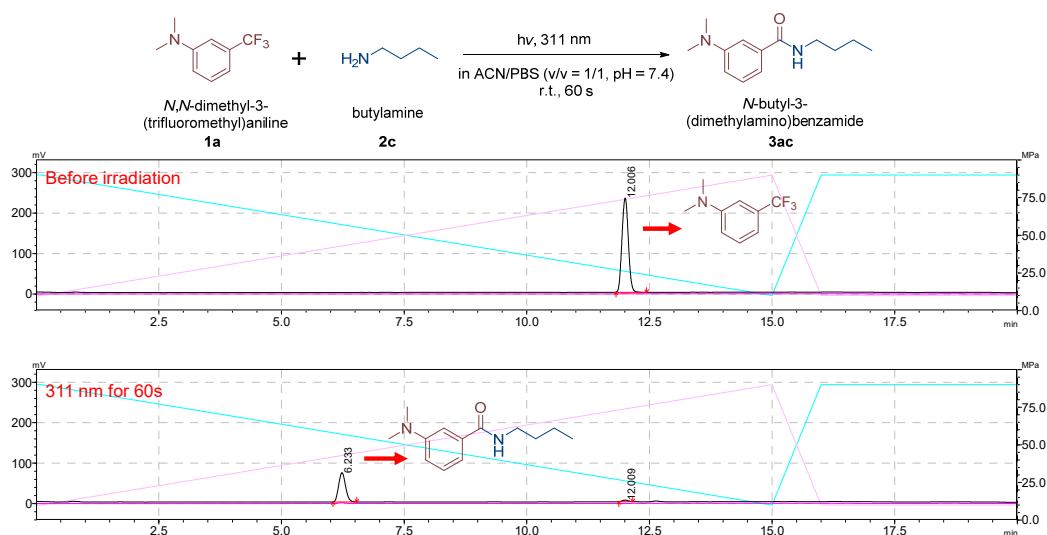

**Figure S44.** HPLC-MS analysis of the photo-DAFEx reaction between **1a** and **2c** in ACN/PBS (v/v = 1/1, pH = 7.4) upon 311 nm irradiation according to the **general procedure I**.

### Preparation and characterization

*N*-butyl-3-(dimethylamino)benzamide (**3ac**)

**Preparation:** **1a** (31.0 mg, 0.16 mmol) and **2c** (60.0 mg, 0.82 mmol) in 200 mL mixture of ACN/PBS (v/v = 1/1, pH = 7.4) were performed for the **general procedure II**, and **3ac** was isolated by flash chromatography (PE : EtOAc = 2 : 1) as a white solid (31.8 mg, 88%);

**<sup>1</sup>H NMR (400 MHz, CDCl<sub>3</sub>)**  $\delta$  7.23 (t,  $J$  = 7.8 Hz, 1H), 7.19 (dd,  $J$  = 2.8, 1.6 Hz, 1H), 6.95 (d,  $J$  = 7.6 Hz, 1H), 6.81 (dd,  $J$  = 8.2, 2.6 Hz, 1H), 6.22 (s, 1H), 3.43 (td,  $J$  = 7.2, 5.6 Hz, 2H), 2.97 (s, 6H), 1.64 – 1.50 (m, 2H), 1.48 – 1.30 (m, 2H), 0.94 (t,  $J$  = 7.3 Hz, 3H).

**<sup>13</sup>C NMR (101 MHz, CDCl<sub>3</sub>)**  $\delta$  168.35, 150.73, 135.81, 129.05, 115.03, 113.82, 111.35, 40.50, 39.77, 31.80, 20.18, 13.82.

**HRMS (ESI)** calculated C<sub>13</sub>H<sub>21</sub>N<sub>2</sub>O<sup>+</sup> [M+H]<sup>+</sup> m/z 221.1648, found 221.1646.

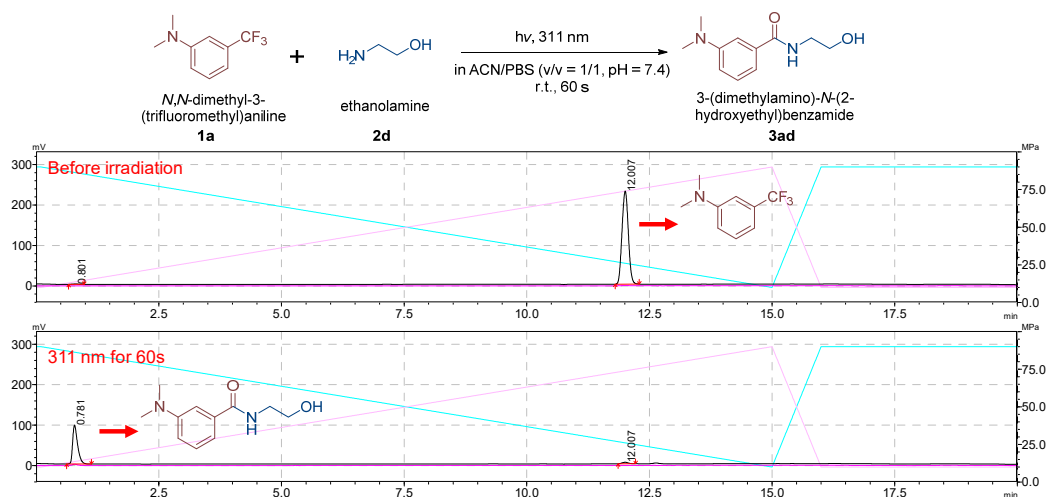

**Figure S45.** HPLC-MS analysis of the photo-DAFEx reaction between **1a** (100  $\mu$ M) and **2d** (500  $\mu$ M) in ACN/PBS ( $v/v = 1/1$ , pH = 7.4) upon 311 nm irradiation according to the **general procedure I**.

### Preparation and characterization

3-(dimethylamino)-*N*-(2-hydroxyethyl)benzamide (**3ad**)

**Preparation:** **1a** (31.0 mg, 0.16 mmol) and **2d** (50.1 mg, 0.82 mmol) in 200 mL mixture of ACN/PBS ( $v/v = 1/1$ , pH = 7.4) were performed for the **general procedure II**, and **3ad** was isolated by flash chromatography (DCM : MeOH = 10 : 1) as a yellow oil (26.2 mg, 77%);

$^1\text{H NMR}$  (400 MHz,  $\text{CDCl}_3$ )  $\delta$  7.23 – 7.18 (m, 1H), 7.16 (dd,  $J = 2.6, 1.6$  Hz, 1H), 7.02 – 6.92 (m, 2H), 6.80 (dd,  $J = 8.2, 2.2$  Hz, 1H), 3.76 (t,  $J = 5.0$  Hz, 2H), 3.55 (q,  $J = 5.6$  Hz, 2H), 2.94 (s, 6H).

$^{13}\text{C NMR}$  (101 MHz,  $\text{CDCl}_3$ )  $\delta$  169.62, 150.67, 134.98, 129.14, 115.37, 114.21, 111.26, 62.20, 42.93, 40.47.

**HRMS (ESI)** calculated  $\text{C}_{11}\text{H}_{17}\text{N}_2\text{O}_2^+$   $[\text{M}+\text{H}]^+$   $m/z$  209.1285, found 209.1283.

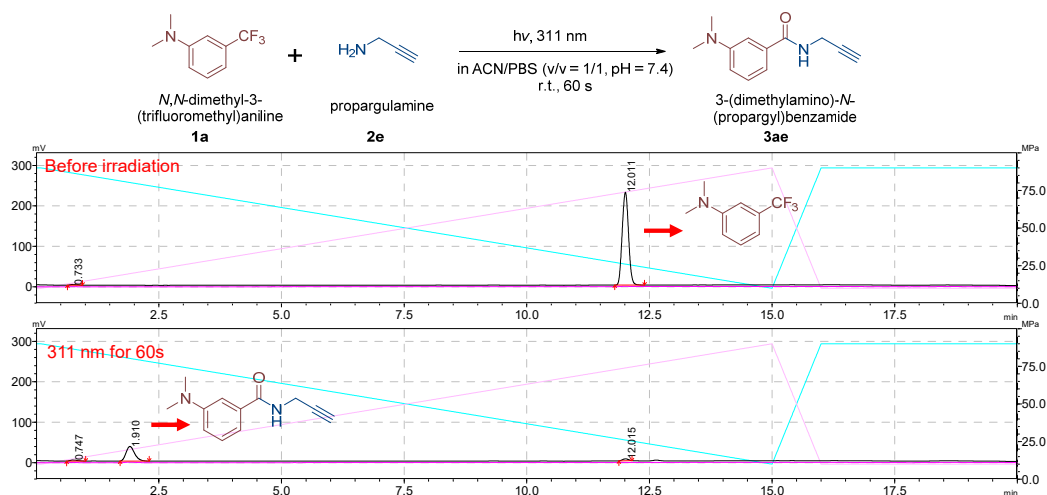

**Figure S46.** HPLC-MS analysis of the photo-DAFEx reaction between **1a** (100  $\mu\text{M}$ ) and **2e** (500  $\mu\text{M}$ ) in ACN/PBS (v/v = 1/1, pH = 7.4) upon 311 nm irradiation according to the **general procedure I**.

### Preparation and characterization

3-(dimethylamino)-*N*-(prop-2-yn-1-yl)benzamide (**3ae**)

**Preparation:** **1a** (31.0 mg, 0.16 mmol) and **2e** (45.2 mg, 0.82 mmol) in 200 mL mixture of ACN/PBS (v/v = 1/1, pH = 7.4) were performed for the **general procedure II**, and **3ae** was isolated by flash chromatography (DCM : MeOH = 10 : 1) as a yellow solid (23.2 mg, 70%);

$^1\text{H NMR}$  (400 MHz,  $\text{CDCl}_3$ )  $\delta$  7.25 (dd,  $J = 8.2, 7.6$  Hz, 1H), 7.19 (dd,  $J = 2.6, 1.6$  Hz, 1H), 6.99 (d,  $J = 7.5$  Hz, 1H), 6.83 (dd,  $J = 7.8, 2.6$  Hz, 1H), 6.40 (s, 1H), 4.23 (dd,  $J = 5.2, 2.6$  Hz, 2H), 2.97 (s, 6H), 2.26 (t,  $J = 2.6$  Hz, 1H).

$^{13}\text{C NMR}$  (101 MHz,  $\text{CDCl}_3$ )  $\delta$  167.98, 150.72, 134.64, 129.18, 115.45, 114.00, 111.33, 79.71, 71.73, 40.48, 29.75.

**HRMS (ESI)** calculated  $\text{C}_{12}\text{H}_{15}\text{N}_2\text{O}^+$   $[\text{M}+\text{H}]^+$  m/z 203.1179, found 203.1176.

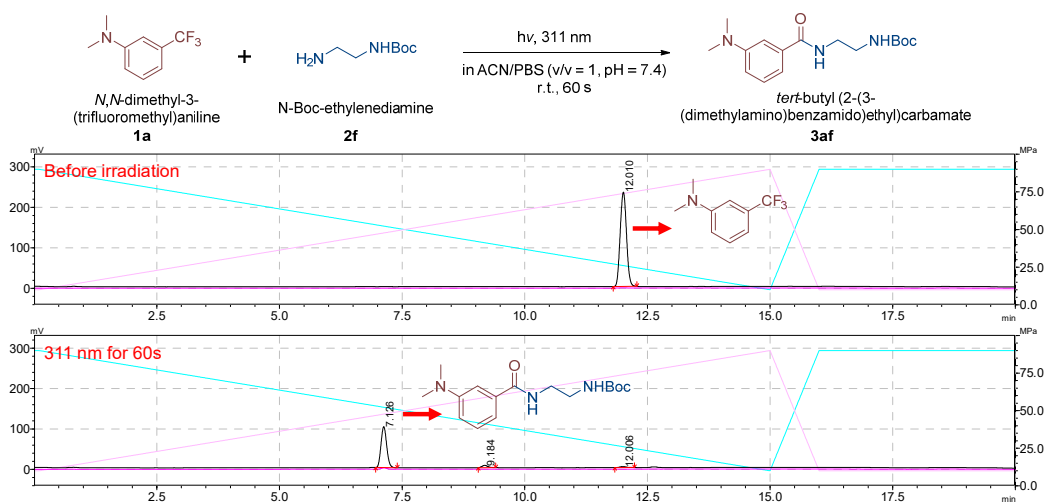

**Figure S47.** HPLC-MS analysis of the photo-DAFEx reaction between **1a** (100  $\mu$ M) and **2f** (500  $\mu$ M) in ACN/PBS (v/v = 1/1, pH = 7.4) upon 311 nm irradiation according to the **general procedure I**.

### Preparation and characterization

*tert*-butyl (2-(3-(dimethylamino)benzamido)ethyl)carbamate (**3af**)

**Preparation:** **1a** (31.0 mg, 0.16 mmol) and **2f** (131.4 mg, 0.82 mmol) in 200 mL mixture of ACN/PBS (v/v = 1/1, pH = 7.4) were performed for the **general procedure II**, and **3af** was isolated by flash chromatography (PE : EtOAc = 2 : 1) as a yellow oil (45.4 mg, 90%).

**$^1\text{H}$  NMR (400 MHz,  $\text{CDCl}_3$ )**  $\delta$  7.28 – 7.19 (m, 2H), 7.14 (s, 1H), 7.05 (d,  $J$  = 7.6 Hz, 1H), 6.82 (dd,  $J$  = 8.2, 2.2 Hz, 1H), 5.11 (s, 1H), 3.53 (q,  $J$  = 5.4 Hz, 2H), 3.37 (q,  $J$  = 5.8 Hz, 2H), 2.97 (s, 6H), 1.41 (s, 9H).

**$^{13}\text{C}$  NMR (101 MHz,  $\text{CDCl}_3$ )**  $\delta$  168.69, 157.31, 150.67, 134.99, 129.08, 115.29, 114.41, 111.31, 79.79, 41.68, 40.53, 40.22, 28.37.

**HRMS (ESI)** calculated  $\text{C}_{16}\text{H}_{26}\text{N}_3\text{O}_3^+$   $[\text{M}+\text{H}]^+$   $m/z$  308.1969, found 308.1964.

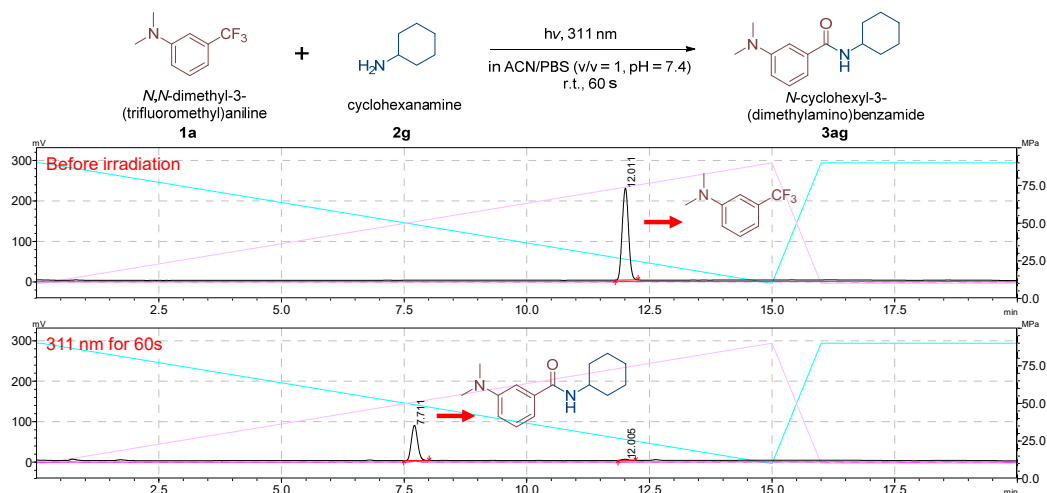

**Figure S48.** HPLC-MS analysis of the photo-DAFEx reaction between **1a** (100  $\mu\text{M}$ ) and **2g** (500  $\mu\text{M}$ ) in ACN/PBS ( $v/v = 1/1$ ,  $\text{pH} = 7.4$ ) upon 311 nm irradiation according to the **general procedure I**.

### Preparation and characterization

*N*-cyclohexyl-3-(dimethylamino)benzamide (**3ag**)

**Preparation:** **1a** (31.0 mg, 0.16 mmol) and **2g** (81.3 mg, 0.82 mmol) in 200 mL mixture of ACN/PBS ( $v/v = 1/1$ ,  $\text{pH} = 7.4$ ) were performed for the **general procedure II**, and **3ag** was isolated by flash chromatography (PE : EtOAc = 2 : 1) as a yellow oil (33.4 mg, 83%).

$^1\text{H NMR}$  (400 MHz,  $\text{CDCl}_3$ )  $\delta$  7.27 – 7.20 (m, 1H), 7.19 (dd,  $J = 2.8, 1.6$  Hz, 1H), 6.93 (d,  $J = 7.8$  Hz, 1H), 6.81 (dd,  $J = 8.3, 1.8$  Hz, 1H), 5.97 (d,  $J = 7.4$  Hz, 1H), 3.97 (dddd,  $J = 14.7, 10.6, 8.0, 3.8$  Hz, 1H), 2.98 (s, 6H), 2.02 (dt,  $J = 12.0, 3.2$  Hz, 2H), 1.79 – 1.59 (m, 3H), 1.53 – 1.34 (m, 2H), 1.30 – 1.15 (m, 3H).

$^{13}\text{C NMR}$  (101 MHz,  $\text{CDCl}_3$ )  $\delta$  167.46, 150.76, 136.09, 129.03, 115.00, 113.74, 111.39, 48.58, 40.53, 33.25, 25.63, 24.93.

**HRMS (ESI)** calculated  $\text{C}_{15}\text{H}_{23}\text{N}_2\text{O}^+$   $[\text{M}+\text{H}]^+$   $m/z$  247.1805, found 247.1803.

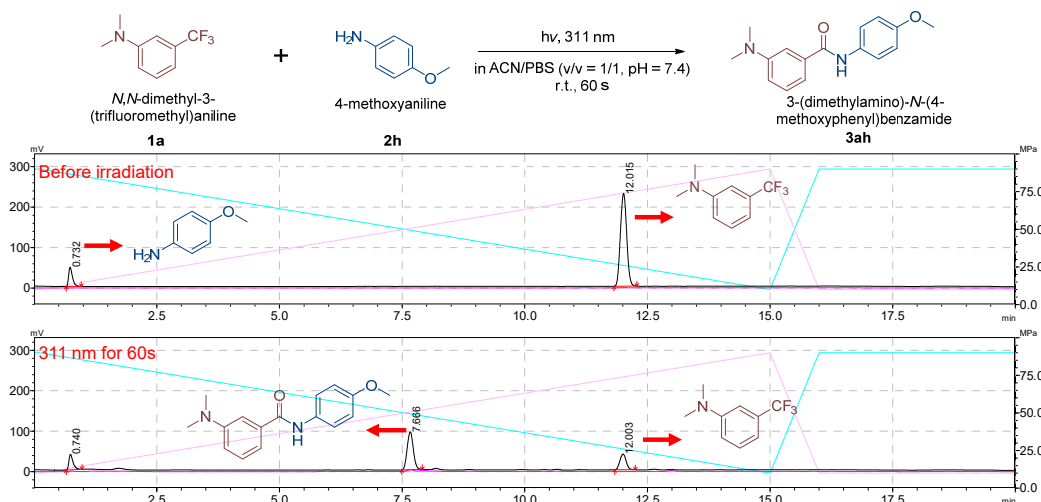

**Figure S49.** HPLC-MS analysis of the photo-DAFEx reaction between **1q** (100  $\mu\text{M}$ ) and **2h** (500  $\mu\text{M}$ ) in ACN/PBS (v/v = 1/1, pH = 7.4) upon 311 nm irradiation according to the **general procedure I**.

### Preparation and characterization

3-(dimethylamino)-*N*-(4-methoxyphenyl)benzamide (**3ah**)

**Preparation:** **1a** (31.0 mg, 0.16 mmol) and **2h** (101.0 mg, 0.82 mmol) in 200 mL mixture of ACN/PBS (v/v = 1/1, pH = 7.4) were performed for the **general procedure II**, and **3ah** was isolated by flash chromatography (PE : EtOAc = 2 : 1) as a yellow solid (24.1 mg, 54%).

**$^1\text{H}$  NMR (400 MHz,  $\text{CDCl}_3$ )**  $\delta$  7.81 (s, 1H), 7.54 (d,  $J$  = 9.0 Hz, 2H), 7.32 – 7.24 (m, 2H), 7.07 (d,  $J$  = 7.6 Hz, 1H), 6.92 – 6.83 (m, 3H), 3.80 (s, 3H), 2.99 (s, 6H).

**$^{13}\text{C}$  NMR (101 MHz,  $\text{CDCl}_3$ )**  $\delta$  166.48, 156.48, 150.81, 135.98, 131.29, 129.28, 121.98, 115.38, 114.21, 113.83, 111.35, 55.52, 40.49.

**HRMS (ESI)** calculated  $\text{C}_{16}\text{H}_{19}\text{N}_2\text{O}_2^+$   $[\text{M}+\text{H}]^+$  m/z 271.1441, found 271.1438.



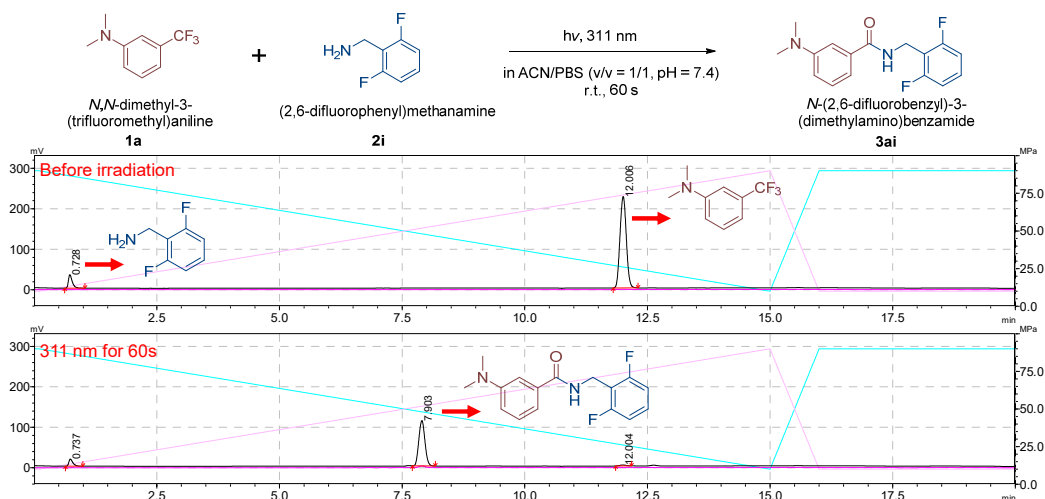

**Figure S50.** HPLC-MS analysis of the photo-DAFEx reaction between **1a** (100  $\mu\text{M}$ ) and **2i** (500  $\mu\text{M}$ ) in ACN/PBS (v/v = 1/1, pH = 7.4) upon 311 nm irradiation according to the **general procedure I**.

### Preparation and characterization

*N*-(2,6-difluorobenzyl)-3-(dimethylamino)benzamide (**3ai**)

**Preparation:** **1a** (31.0 mg, 0.16 mmol) and **2i** (117.4 mg, 0.82 mmol) in 200 mL mixture of ACN/PBS (v/v = 1/1, pH = 7.4) were performed for the **general procedure II**, and **3ai** was isolated by flash chromatography (PE : EtOAc = 2 : 1) as a white solid (42.7 mg, 90%).

$^1\text{H NMR}$  (400 MHz,  $\text{CDCl}_3$ )  $\delta$  7.27 – 7.20 (m, 3H), 6.96 – 6.88 (m, 3H), 6.82 (ddd,  $J = 8.4, 2.8, 0.8$  Hz, 1H), 6.46 (s, 1H), 4.74 (dd,  $J = 5.8, 1.2$  Hz, 2H), 2.97 (s, 6H).

$^{13}\text{C NMR}$  (101 MHz,  $\text{CDCl}_3$ )  $\delta$  167.85, 162.87 (d,  $J = 7.6$  Hz), 160.39 (d,  $J = 8.0$  Hz), 150.74, 135.05, 129.51 (t,  $J = 10.5$  Hz), 129.08, 115.28, 114.11 (d,  $J = 18.9$  Hz), 113.81, 111.56 (d,  $J = 7.9$  Hz), 111.51, 111.38 (d,  $J = 6.5$  Hz), 40.48, 32.02 (t,  $J = 3.7$  Hz).

$^{19}\text{F NMR}$  (376 MHz,  $\text{CDCl}_3$ )  $\delta$  -114.73.

**HRMS (ESI)** calculated  $\text{C}_{16}\text{H}_{17}\text{F}_2\text{N}_2\text{O}^+$   $[\text{M}+\text{H}]^+$  m/z 291.1303, found 291.1299.

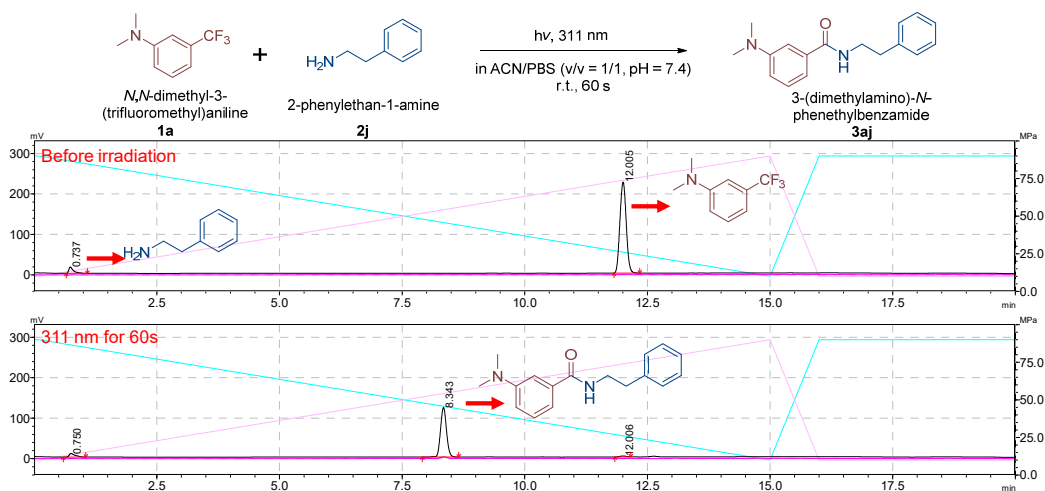

**Figure S51.** HPLC-MS analysis of the photo-DAFEx reaction between **1a** (100  $\mu\text{M}$ ) and **2j** (500  $\mu\text{M}$ ) in ACN/PBS ( $v/v = 1/1$ ,  $\text{pH} = 7.4$ ) upon 311 nm irradiation according to the **general procedure I**.

### Preparation and characterization

#### 3-(dimethylamino)-*N*-phenethylbenzamide (**3aj**)

**Preparation:** **1a** (31.0 mg, 0.16 mmol) and **2j** (99.4 mg, 0.82 mmol) in 200 mL mixture of ACN/PBS ( $v/v = 1/1$ ,  $\text{pH} = 7.4$ ) were performed for the **general procedure II**, and **3aj** was isolated by flash chromatography (PE : EtOAc = 2 : 1) as a white solid (38.1 mg, 87%).

**$^1\text{H NMR}$  (400 MHz,  $\text{CDCl}_3$ )**  $\delta$  7.41 – 7.35 (m, 2H), 7.33 – 7.27 (m, 4H), 7.20 (dd,  $J = 2.8, 1.6$  Hz, 1H), 6.95 (d,  $J = 7.4$  Hz, 1H), 6.87 (ddd,  $J = 8.4, 2.6, 0.8$  Hz, 1H), 6.29 (s, 1H), 3.76 (td,  $J = 6.8, 5.8$  Hz, 2H), 3.02 (s, 6H), 2.98 (t,  $J = 6.8$  Hz, 2H).

**$^{13}\text{C NMR}$  (101 MHz,  $\text{CDCl}_3$ )**  $\delta$  168.34, 150.69, 139.08, 135.60, 129.13, 128.89, 128.70, 126.56, 115.13, 113.90, 111.22, 41.14, 40.48, 35.77.

**HRMS (ESI)** calculated  $\text{C}_{17}\text{H}_{21}\text{N}_2\text{O}^+$   $[\text{M}+\text{H}]^+$   $m/z$  269.1648, found 269.1644.

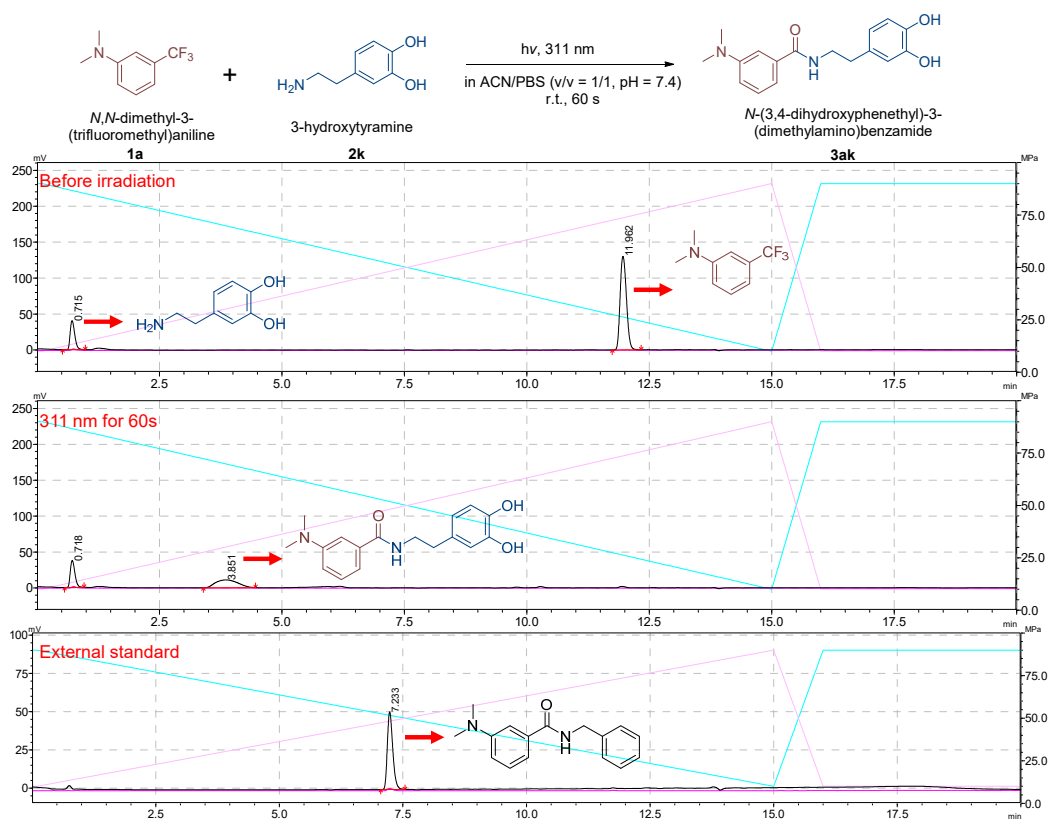

| Item               | Peak No. | Retention Time (min) | Area    |
|--------------------|----------|----------------------|---------|
| Before irradiation | 1        | 0.715                | 259714  |
|                    | 2        | 11.962               | 1164239 |
| 311 nm for 60 s    | 3        | 0.718                | 245016  |
|                    | 4        | 3.851                | 344354  |
| External standard  | 5        | 7.233                | 385476  |
| HPLC yield         | 45%      |                      |         |

**Figure S52.** HPLC-MS analysis of the photo-DAFEx reaction between **1a** (100  $\mu\text{M}$ ) and **2k** (500  $\mu\text{M}$ ) in ACN/PBS (v/v = 1/1, pH = 7.4) upon 311 nm irradiation according to the **general procedure I**. and the HPLC yield of **3ak** was determined by external standard *N*-benzyl-3-(dimethylamino)benzamide (**3aa**, 50  $\mu\text{M}$ ).

### Preparation and characterization

#### *N*-(3,4-dihydroxyphenethyl)-3-(dimethylamino)benzamide (**3ak**)

In attempting to isolate the **3ak**, we found that both the starting material, dopamine, and the related conjugate **3ak** are sensitive to photo-irradiation, which resulted in their photo-decomposition under continuous irradiation for 1 h, and consequently led to a messy mixture. Therefore, we were unable to obtain a purely isolated **3ak** for characterization via  $^1\text{H}$  and  $^{13}\text{C}$  NMR.

**HRMS (ESI)** calculated  $\text{C}_{17}\text{H}_{21}\text{N}_2\text{O}_3^+$   $[\text{M}+\text{H}]^+$   $m/z$  301.1547, found 301.1544.

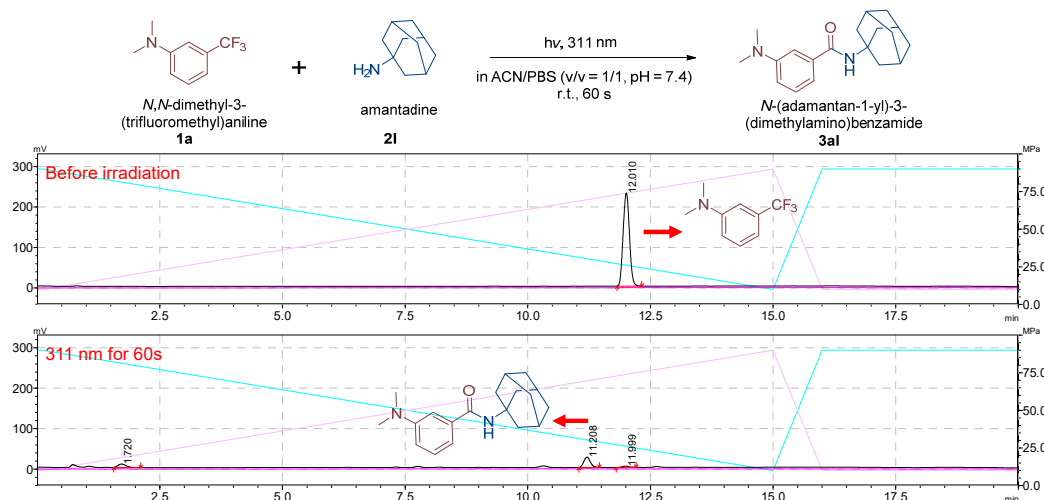

**Figure S53.** HPLC-MS analysis of the photo-DAFEx reaction between **1a** (100  $\mu$ M) and **21** (500  $\mu$ M) in ACN/PBS (v/v = 1/1, pH = 7.4) upon 311 nm irradiation according to the **general procedure I**.

### Preparation and characterization

*N*-(adamantan-1-yl)-3-(dimethylamino)benzamide (**3a1**)

**Preparation:** **1a** (31.0 mg, 0.16 mmol) and **21** (124.0 mg, 0.82 mmol) in 200 mL mixture of ACN/PBS (v/v = 1/1, pH = 7.4) were performed for the **general procedure II**, and **3a1** was isolated by flash chromatography (PE : EtOAc = 2 : 1) as a white solid (37.6 mg, 77%).

**$^1\text{H}$  NMR (400 MHz,  $\text{CDCl}_3$ )**  $\delta$  7.22 (dd,  $J$  = 8.2, 7.6 Hz, 1H), 7.19 (dd,  $J$  = 2.8, 1.6 Hz, 1H), 6.89 (ddd,  $J$  = 7.6, 1.6, 0.8 Hz, 1H), 6.80 (ddd,  $J$  = 8.3, 2.8, 0.8 Hz, 1H), 5.81 (s, 1H), 2.98 (s, 6H), 2.12 (s, 9H), 1.72 (s, 6H).

**$^{13}\text{C}$  NMR (101 MHz,  $\text{CDCl}_3$ )**  $\delta$  167.41, 150.78, 136.91, 128.93, 114.85, 113.63, 111.40, 52.15, 41.70, 40.53, 36.44, 29.54.

**HRMS (ESI)** calculated  $\text{C}_{19}\text{H}_{27}\text{N}_2\text{O}^+$   $[\text{M}+\text{H}]^+$   $m/z$  299.2118, found 299.2120.

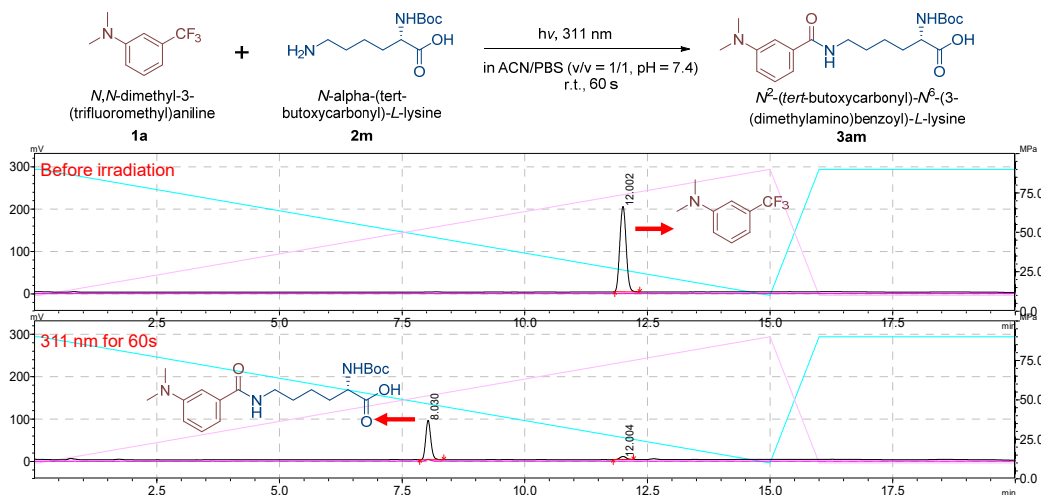

**Figure S54.** HPLC-MS analysis of the photo-DAFEx reaction between **1a** (100  $\mu$ M) and **2m** (500  $\mu$ M) in ACN/PBS (v/v = 1/1, pH = 7.4) upon 311 nm irradiation according to the **general procedure I**.

### Preparation and characterization

*N*<sup>2</sup>-(tert-butoxycarbonyl)-*N*<sup>6</sup>-(3-(dimethylamino)benzoyl)-L-lysine (**3a**)

**Preparation:** **1a** (31.0 mg, 0.16 mmol) and **2m** (201.9 mg, 0.82 mmol) in 200 mL mixture of ACN/PBS (v/v = 1/1, pH = 7.4) were performed for the **general procedure II**, and **3a** was isolated by flash chromatography (PE : EtOAc = 2 : 1) as a yellow oil (52.2 mg, 81%).

<sup>1</sup>H NMR (400 MHz, CDCl<sub>3</sub>)  $\delta$  9.88 (s, 1H), 7.25 – 7.17 (m, 2H), 7.02 (d, *J* = 7.6 Hz, 1H), 6.82 (dd, *J* = 8.2, 2.6 Hz, 1H), 6.74 (s, 1H), 5.33 (d, *J* = 7.8 Hz, 1H), 4.26 (d, *J* = 6.8 Hz, 1H), 3.37 (q, *J* = 6.6 Hz, 2H), 2.93 (s, 6H), 1.92 – 1.51 (m, 4H), 1.46 – 1.33 (m, 11H).

<sup>13</sup>C NMR (101 MHz, CDCl<sub>3</sub>)  $\delta$  175.48, 169.03, 150.51, 135.24, 129.16, 115.72, 114.92, 111.87, 79.93, 53.27, 40.71, 39.84, 32.17, 28.97, 28.32, 22.56.

HRMS (ESI) calculated C<sub>20</sub>H<sub>32</sub>N<sub>3</sub>O<sub>5</sub><sup>+</sup> [M+H]<sup>+</sup> m/z 394.2336, found 394.2330.

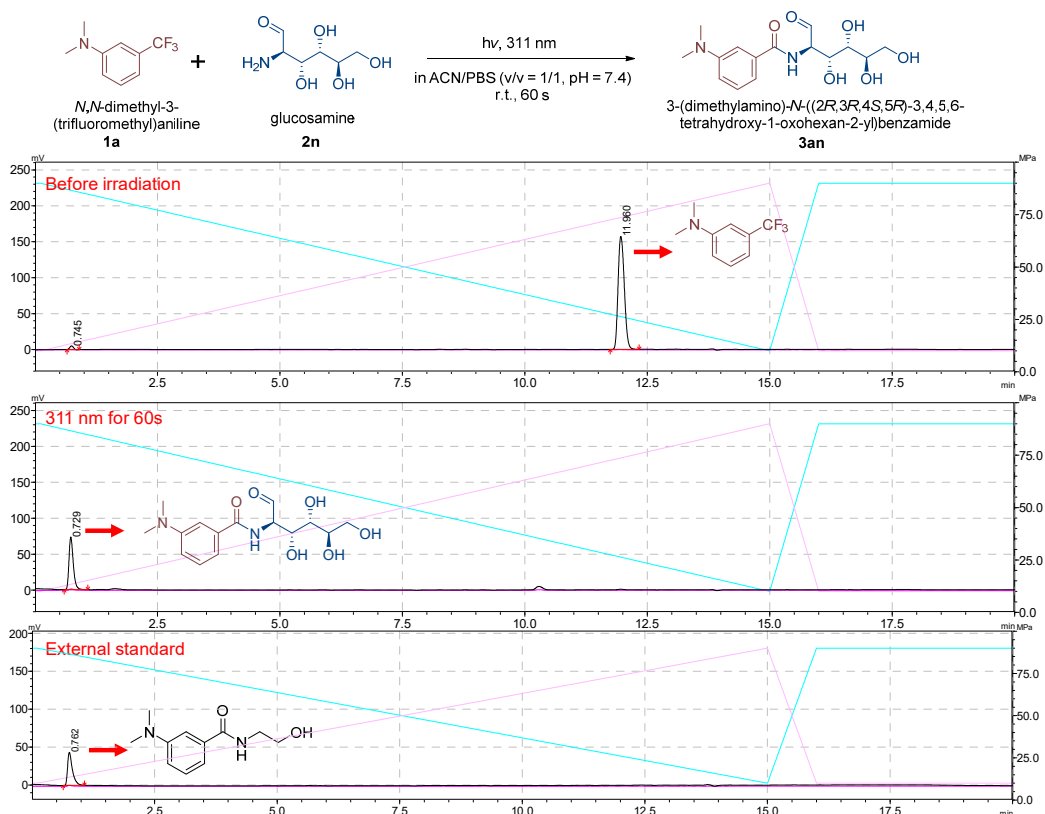

| Item               | Peak No. | Retention Time (min) | Area    |
|--------------------|----------|----------------------|---------|
| Before irradiation | 1        | 0.745                | 25190   |
|                    | 2        | 11.960               | 1391940 |
| 311 nm for 60 s    | 3        | 0.729                | 444535  |
| External standard  | 4        | 0.762                | 297489  |
| HPLC yield         | 75%      |                      |         |

**Figure S55.** HPLC-MS analysis of the photo-DAFex reaction between **1a** (100  $\mu$ M) and **2n** (500  $\mu$ M) in ACN/PBS (v/v = 1/1, pH = 7.4) upon 311 nm irradiation according to the **general procedure I**, and the yield of **3an** was determined by external standard 3-(dimethylamino)-*N*-(2-hydroxyethyl)benzamide (**3ad**, 50  $\mu$ M).

### Preparation and characterization

#### 3-(dimethylamino)-*N*-((2*R*,3*R*,4*S*,5*R*)-3,4,5,6-tetrahydroxy-1-oxohexan-2-yl)benzamide (**3an**)

In attempting to isolate the **3an**, we found that the desired conjugate **3an** is very soluble in water containing solvent system, which resulted in difficulty in the separation against the starting material, glucosamine. Therefore, we were unable to obtain a purely isolated **3an** for characterization via  $^1\text{H}$  and  $^{13}\text{C}$  NMR.

**HRMS (ESI)** calculated  $\text{C}_{15}\text{H}_{23}\text{N}_2\text{O}_6^+$   $[\text{M}+\text{H}]^+$   $m/z$  327.1551, found 327.1546.

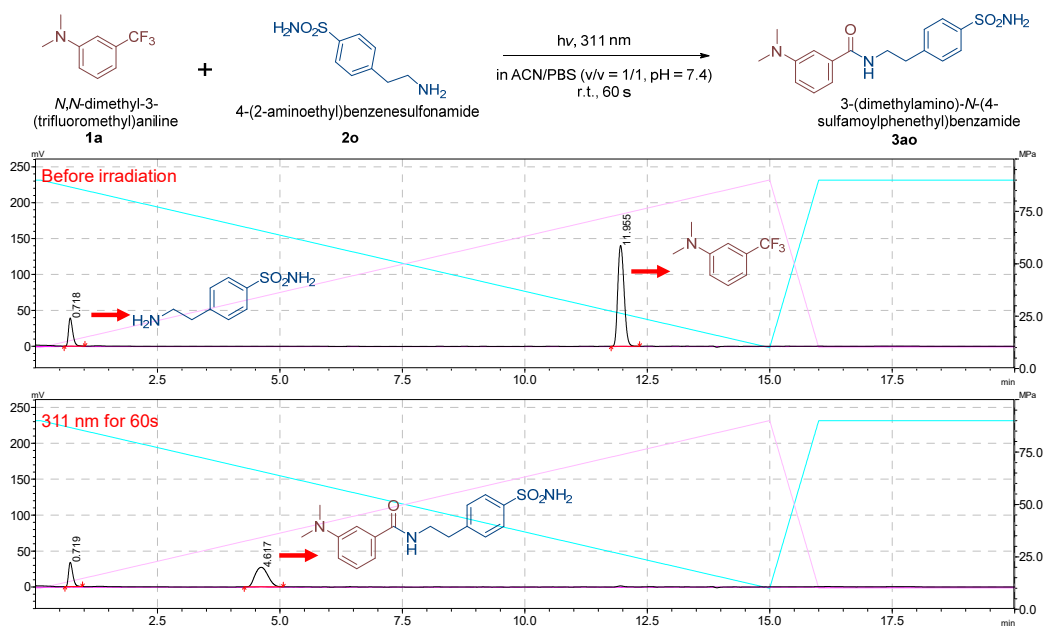

**Figure S56.** HPLC-MS analysis of the photo-DAFEx reaction between **1a** (100  $\mu\text{M}$ ) and **2o** (500  $\mu\text{M}$ ) in ACN/PBS (v/v = 1/1, pH = 7.4) upon 311 nm irradiation according to the **general procedure I**.

### Preparation and characterization

#### 3-(dimethylamino)-N-(4-sulfamoylphenethyl)benzamide (**3ao**)

**Preparation:** **1a** (31.0 mg, 0.16 mmol) and **2o** (164.2 mg, 0.82 mmol) in 200 mL mixture of ACN/PBS (v/v = 1/1, pH = 7.4) were performed for the **general procedure II** and **3ao** was isolated by flash chromatography (DCM : MeOH = 10 : 1) as a yellow solid (49.2 mg, 86%).

**$^1\text{H NMR}$  (400 MHz, DMSO- $d_6$ )**  $\delta$  8.46 (t,  $J$  = 5.6 Hz, 1H), 7.79 – 7.71 (m, 2H), 7.43 (d,  $J$  = 8.4 Hz, 2H), 7.28 (s, 2H), 7.23 (t,  $J$  = 7.8 Hz, 1H), 7.11 (dd,  $J$  = 2.6, 1.6 Hz, 1H), 7.08 (dt,  $J$  = 7.8, 1.2 Hz, 1H), 6.85 (ddd,  $J$  = 8.2, 2.6, 0.8 Hz, 1H), 3.53 – 3.45 (m, 2H), 2.96 – 2.88 (m, 8H).

**$^{13}\text{C NMR}$  (101 MHz, DMSO- $d_6$ )**  $\delta$  167.41, 150.70, 144.34, 142.51, 135.77, 129.64, 129.25, 126.17, 115.34, 115.29, 111.41, 40.90, 35.28, 29.49.

**HRMS (ESI)** calculated  $\text{C}_{17}\text{H}_{22}\text{N}_3\text{O}_3\text{S}^+$   $[\text{M}+\text{H}]^+$   $m/z$  348.1376, found 348.1371.

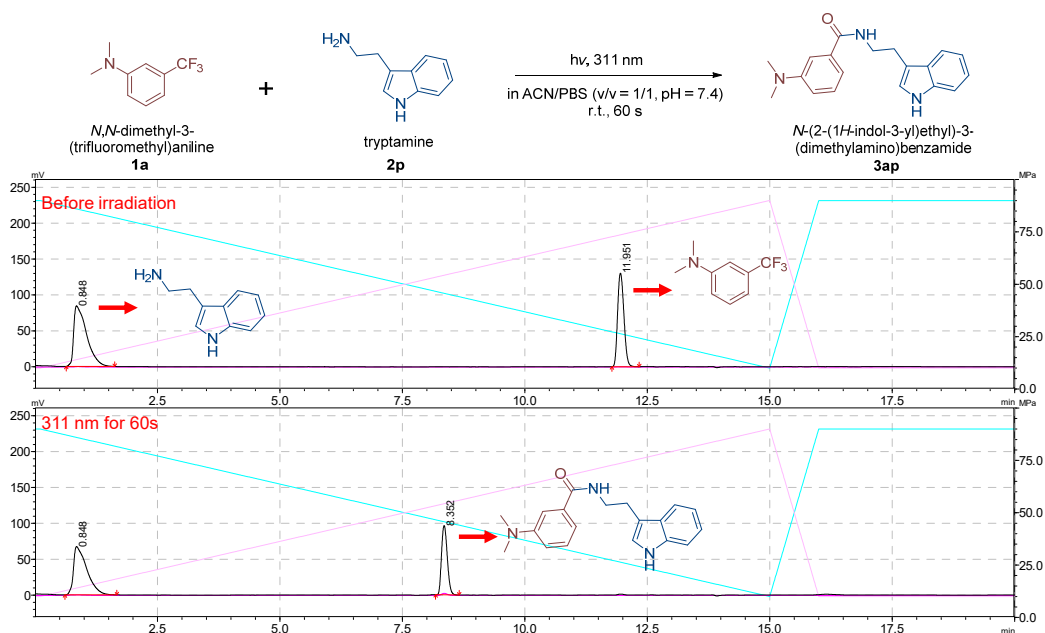

**Figure S57.** HPLC-MS analysis of the photo-DAFex reaction between **1a** (100  $\mu$ M) and **2p** (500  $\mu$ M) in ACN/PBS ( $v/v = 1/1$ , pH = 7.4) upon 311 nm irradiation according to the **general procedure I**.

### Preparation and characterization

#### *N*-(2-(1*H*-indol-3-yl)ethyl)-3-(dimethylamino)benzamide (**3ap**)

**Preparation:** **1a** (31.0 mg, 0.16 mmol) and **2p** (131.38 mg, 0.82 mmol) in 200 mL mixture of ACN/PBS ( $v/v = 1/1$ , pH = 7.4) were performed for the **general procedure II**, and **3ap** was isolated by flash chromatography (PE : EtOAc = 2 : 1) as a yellow solid (39 mg, 77%).

**$^1\text{H}$  NMR (400 MHz,  $\text{CDCl}_3$ )**  $\delta$  8.91 (s, 1H), 7.64 (dd,  $J = 7.8, 1.2$  Hz, 1H), 7.35 (dt,  $J = 8.2, 1.0$  Hz, 1H), 7.24 – 7.17 (m, 1H), 7.17 (dq,  $J = 5.2, 1.2$  Hz, 2H), 7.11 (ddd,  $J = 8.0, 7.0, 1.2$  Hz, 1H), 6.98 (d,  $J = 2.4$  Hz, 1H), 6.93 (ddd,  $J = 7.8, 1.8, 0.8$  Hz, 1H), 6.80 (ddd,  $J = 8.4, 2.8, 0.8$  Hz, 1H), 6.56 (t,  $J = 5.8$  Hz, 1H), 3.77 (td,  $J = 6.8, 5.6$  Hz, 2H), 3.09 – 3.05 (m, 2H), 2.90 (s, 6H).

**$^{13}\text{C}$  NMR (101 MHz,  $\text{CDCl}_3$ )**  $\delta$  168.67, 150.63, 136.61, 135.59, 129.19, 127.40, 122.52, 121.94, 119.29, 118.65, 115.29, 112.59, 111.57, 111.29, 40.55, 40.50, 25.32.

**HRMS (ESI)** calculated  $\text{C}_{19}\text{H}_{22}\text{N}_3\text{O}^+$   $[\text{M}+\text{H}]^+$   $m/z$  308.1757, found 308.1751.



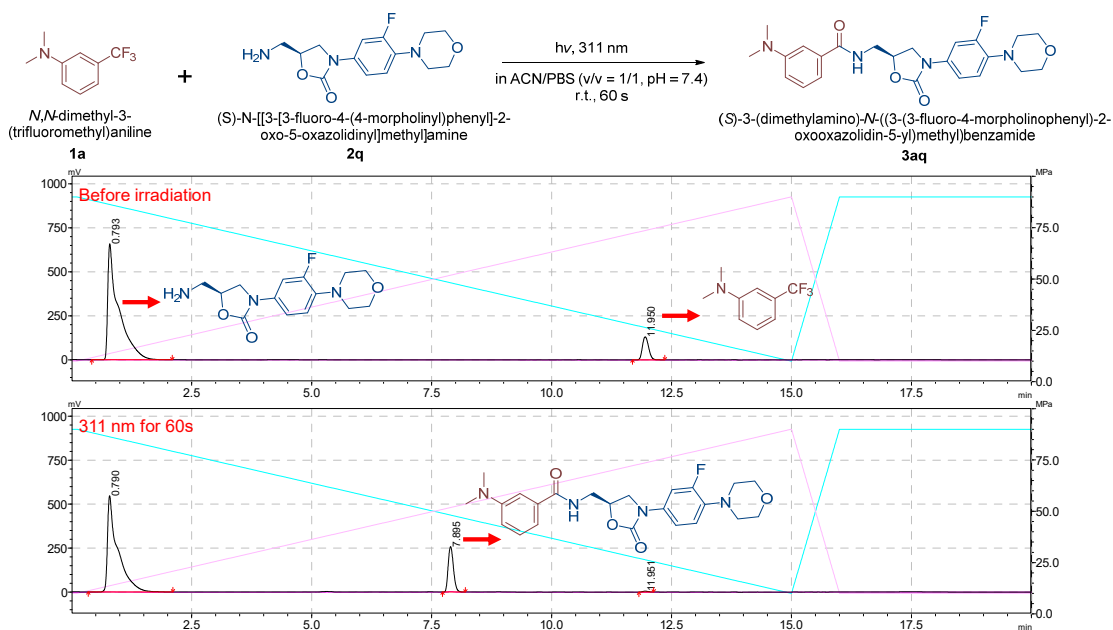

**Figure S58.** HPLC-MS analysis of the photo-DAFEx reaction between **1a** (100  $\mu\text{M}$ ) and **2q** (500  $\mu\text{M}$ ) in ACN/PBS (v/v = 1/1, pH = 7.4) upon 311 nm irradiation according to the **general procedure I**.

### Preparation and characterization

(S)-3-(dimethylamino)-N-((3-(3-fluoro-4-morpholinophenyl)-2-oxooxazolidin-5-yl)methyl)benzamide (**3aq**)

**Preparation:** **1a** (31.0 mg, 0.16 mmol) and **2q** (242.15 mg, 0.82 mmol) in 200 mL mixture of ACN/PBS (v/v = 1/1, pH = 7.4) were performed for the **general procedure II**, and **3aq** was isolated by flash chromatography (PE : EtOAc = 2 : 1) as a yellow solid (59.1 mg, 82%).

**$^1\text{H}$  NMR (400 MHz,  $\text{CDCl}_3$ )**  $\delta$  7.37 (dd,  $J$  = 14.4, 2.6 Hz, 1H), 7.25 – 7.14 (m, 2H), 7.12 (dd,  $J$  = 2.6, 1.6 Hz, 1H), 7.01 (ddt,  $J$  = 7.6, 4.8, 1.2 Hz, 2H), 6.83 (t,  $J$  = 9.2 Hz, 1H), 6.78 (ddd,  $J$  = 8.4, 2.8, 0.8 Hz, 1H), 4.87 – 4.76 (m, 1H), 3.99 (t,  $J$  = 9.0 Hz, 1H), 3.85 – 3.72 (m, 7H), 3.01 – 2.96 (m, 4H), 2.91 (s, 6H).

**$^{13}\text{C}$  NMR (101 MHz,  $\text{CDCl}_3$ )**  $\delta$  169.37, 155.40 (d,  $J$  = 246.3 Hz), 154.56, 150.62, 136.41 (d,  $J$  = 8.7 Hz), 134.47, 133.01 (d,  $J$  = 10.7 Hz), 129.23, 118.79 (d,  $J$  = 4.2 Hz), 115.57, 114.40, 114.05 (d,  $J$  = 3.0 Hz), 111.11, 107.53 (d,  $J$  = 26.2 Hz), 72.17, 66.92, 50.96 (d,  $J$  = 2.9 Hz), 47.88, 42.55, 40.41.

**HRMS (ESI)** calculated  $\text{C}_{23}\text{H}_{28}\text{FN}_4\text{O}_4^+$   $[\text{M}+\text{H}]^+$  m/z 443.2089, found 443.2085.

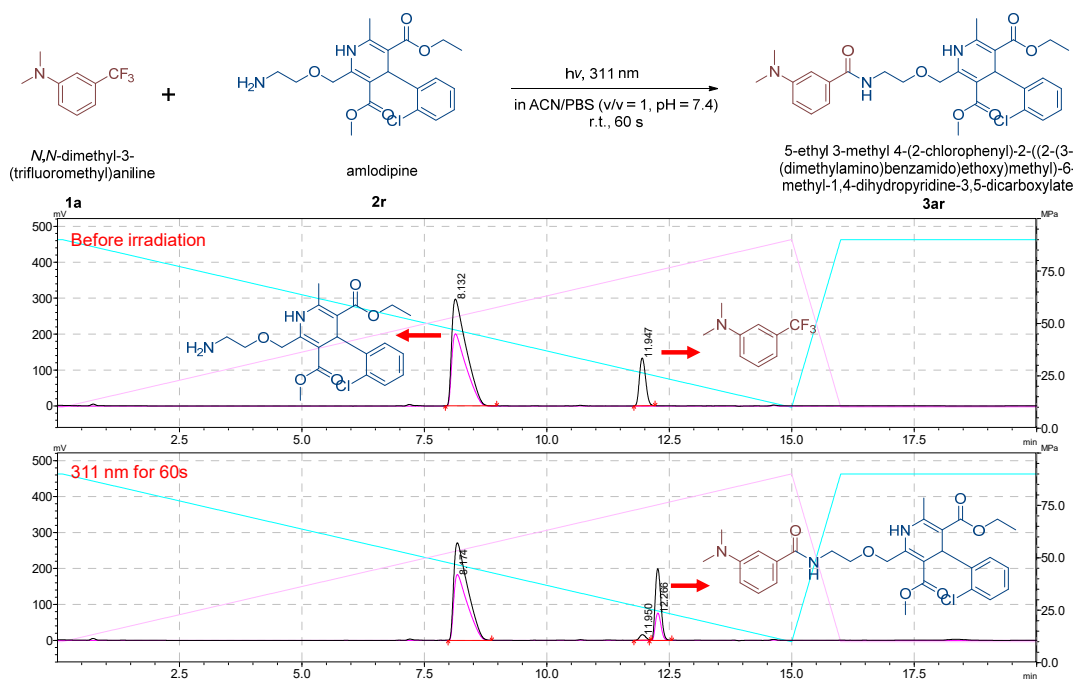

**Figure S59.** HPLC-MS analysis of the photo-DAFEx reaction between **1a** (100  $\mu$ M) and **2r** (500  $\mu$ M) in ACN/PBS (v/v = 1/1, pH = 7.4) upon 311 nm irradiation according to the **general procedure I**.

### Preparation and characterization

5-ethyl 3-methyl 4-(2-chlorophenyl)-2-((2-(3-(dimethylamino)benzamido)ethoxy)methyl)-6-methyl-1,4-dihydropyridine-3,5-dicarboxylate (**3ar**)

**Preparation:** **1a** (31.0 mg, 0.16 mmol) and **2r** (335.28 mg, 0.82 mmol) in 200 mL mixture of ACN/PBS (v/v = 1/1, pH = 7.4) were performed for the **general procedure II**, and **3ar** was isolated by flash chromatography (PE : EtOAc = 2 : 1) as a yellow solid (79.1 mg, 87%).

**$^1\text{H}$  NMR (400 MHz, DMSO- $d_6$ )**  $\delta$  8.51 (t,  $J$  = 5.6 Hz, 1H), 8.47 (s, 1H), 7.35 – 7.06 (m, 7H), 6.86 (dd,  $J$  = 8.2, 2.8 Hz, 1H), 5.29 (s, 1H), 4.62 (q,  $J$  = 14.2 Hz, 2H), 3.96 (qq,  $J$  = 6.8, 3.8 Hz, 2H), 3.61 (t,  $J$  = 5.6 Hz, 2H), 3.50 (d,  $J$  = 7.8 Hz, 5H), 2.92 (s, 6H), 2.24 (s, 3H), 1.10 (t,  $J$  = 7.2 Hz, 3H).

**$^{13}\text{C}$  NMR (101 MHz, DMSO- $d_6$ )**  $\delta$  167.76, 167.57, 166.74, 150.75, 146.34, 145.84, 145.55, 135.55, 131.55, 131.45, 129.40, 129.22, 128.21, 127.87, 115.42, 115.31, 111.45, 102.79, 102.30, 79.65, 69.98, 66.94, 59.82, 50.94, 40.55, 37.13, 18.59, 14.53.

**HRMS (ESI)** calculated  $\text{C}_{29}\text{H}_{34}\text{ClKN}_3\text{O}_6^+$  [M+K] $^+$  m/z 594.1768, found 594.1764.

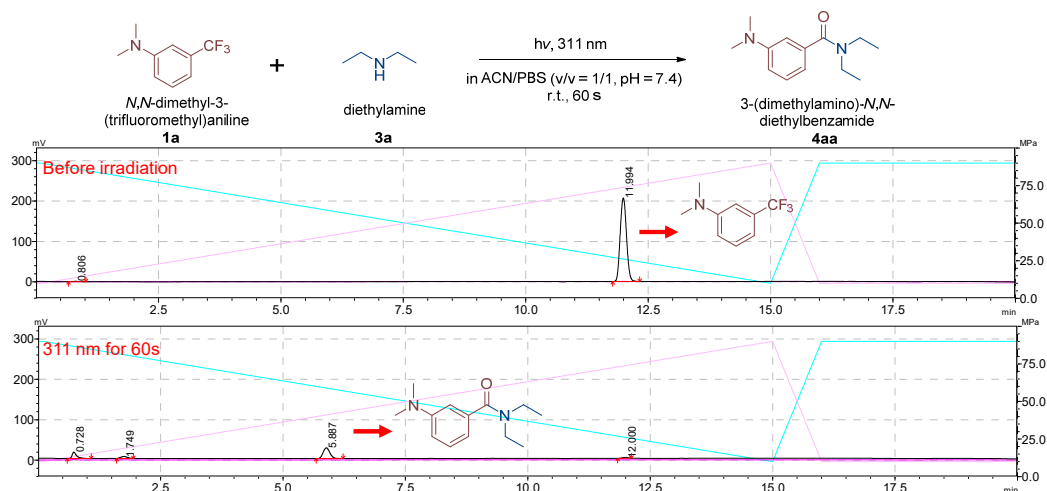

**Figure S60.** HPLC-MS analysis of the photo-DAFEx reaction between **1a** (100  $\mu\text{M}$ ) and **3a** (500  $\mu\text{M}$ ) in ACN/PBS ( $v/v = 1/1$ ,  $\text{pH} = 7.4$ ) upon 311 nm irradiation according to the **general procedure I**.

### Preparation and characterization

3-(dimethylamino)-*N,N*-diethylbenzamide (**4aa**)

**Preparation:** **1a** (31.0 mg, 0.16 mmol) and **3a** (60.0 mg, 0.82 mmol) in 200 mL mixture of ACN/PBS ( $v/v = 1/1$ ,  $\text{pH} = 7.4$ ) were performed for the **general procedure II**, and **4aa** was isolated by flash chromatography (PE : EtOAc = 2 : 1) as a white solid (32.2 mg, 89%).

$^1\text{H NMR}$  (400 MHz,  $\text{CDCl}_3$ )  $\delta$  7.21 (t,  $J = 7.8$  Hz, 1H), 6.76 – 6.62 (m, 3H), 3.52 (s, 2H), 3.26 (s, 2H), 2.94 (s, 6H), 1.23 (d,  $J = 8.6$  Hz, 3H), 1.11 (d,  $J = 10.2$  Hz, 3H).

$^{13}\text{C NMR}$  (101 MHz,  $\text{CDCl}_3$ )  $\delta$  172.08, 150.49, 138.05, 129.01, 114.00, 113.02, 110.15, 43.24, 40.49, 39.08, 14.32, 12.92.

**HRMS (ESI)** calculated  $\text{C}_{13}\text{H}_{21}\text{N}_2\text{O}^+$   $[\text{M}+\text{H}]^+$   $m/z$  221.1648, found 221.1641.

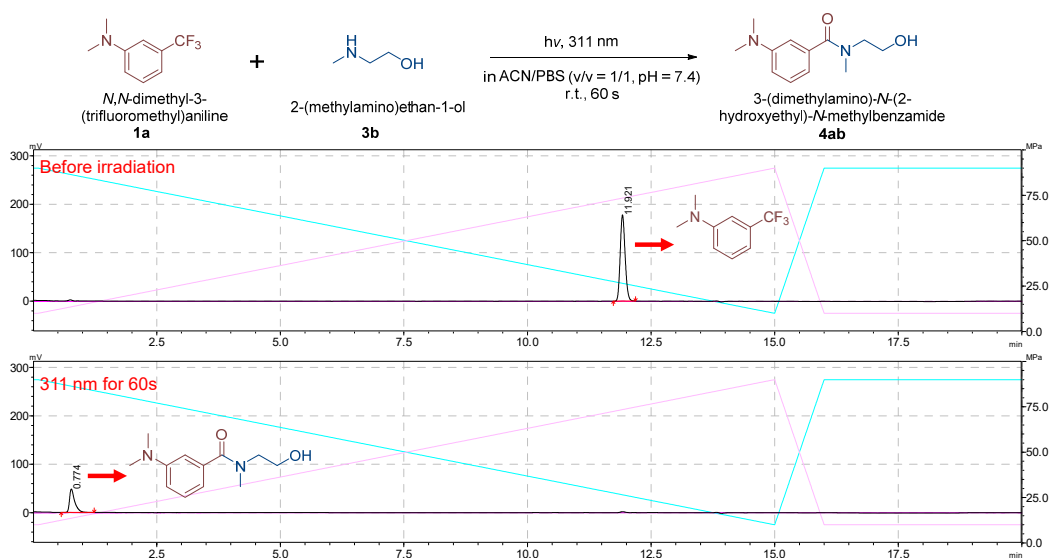

**Figure S61.** HPLC-MS analysis of the photo-DAFEx reaction between **1a** (100  $\mu$ M) and **3b** (500  $\mu$ M) in ACN/PBS ( $v/v = 1/1$ , pH = 7.4) upon 311 nm irradiation according to the **general procedure I**.

### Preparation and characterization

3-(dimethylamino)-*N*-(2-hydroxyethyl)-*N*-methylbenzamide (**4ab**)

**Preparation:** **1a** (31.0 mg, 0.16 mmol) and **3b** (61.6 mg, 0.82 mmol) in 200 mL mixture of ACN/PBS ( $v/v = 1/1$ , pH = 7.4) were performed for the **general procedure II**, and **4ab** was isolated by flash chromatography (PE : EtOAc = 2 : 1) as a yellow oil (31.5 mg, 86%).

$^1\text{H NMR}$  (400 MHz,  $\text{CDCl}_3$ )  $\delta$  7.21 (dd,  $J = 9.8, 7.2$  Hz, 1H), 6.77 – 6.66 (m, 3H), 3.90 – 3.61 (m, 4H), 3.11 – 2.99 (m, 3H), 2.94 (s, 6H).

$^{13}\text{C NMR}$  (101 MHz,  $\text{CDCl}_3$ )  $\delta$  174.28, 150.51, 136.54, 129.00, 114.70, 113.72, 110.91, 61.21, 51.14, 40.47, 38.77.

**HRMS (ESI)** calculated  $\text{C}_{12}\text{H}_{19}\text{N}_2\text{O}_2^+$   $[\text{M}+\text{H}]^+$   $m/z$  223.1441, found 223.1440.

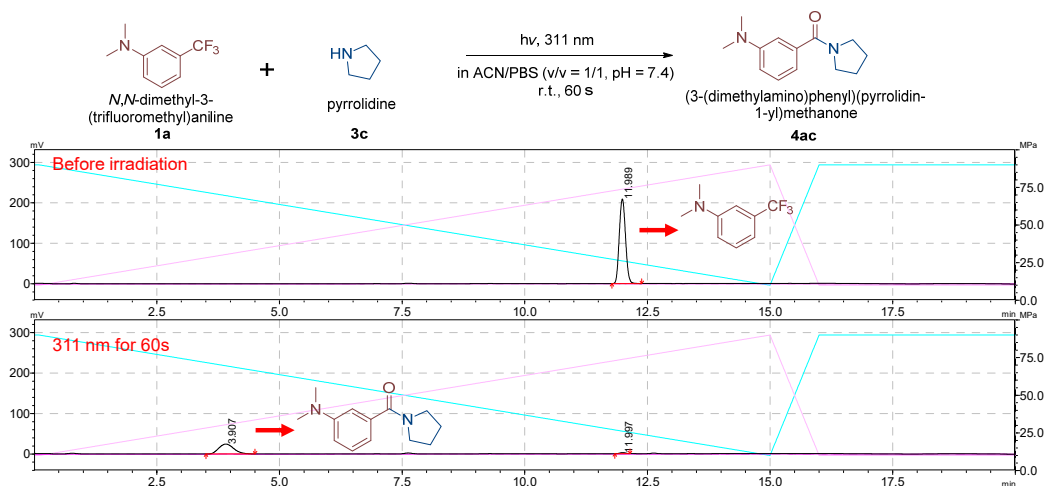

**Figure S62.** HPLC-MS analysis of the photo-DAFEx reaction between **1a** (100  $\mu\text{M}$ ) and **3c** (500  $\mu\text{M}$ ) in ACN/PBS (v/v = 1/1, pH = 7.4) upon 311 nm irradiation according to the **general procedure I**.

### Preparation and characterization

(3-(dimethylamino)phenyl)(pyrrolidin-1-yl)methanone (**4ac**)

**Preparation:** **1a** (31.0 mg, 0.16 mmol) and **3c** (58.3 mg, 0.82 mmol) in 200 mL mixture of ACN/PBS (v/v = 1/1, pH = 7.4) were performed for the **general procedure II**, and **4ac** was isolated by flash chromatography (PE : EtOAc = 2 : 1) as a yellow oil (30.1 mg, 84%).

**$^1\text{H}$  NMR (400 MHz,  $\text{CDCl}_3$ )**  $\delta$  7.22 (dd,  $J$  = 8.4, 7.4 Hz, 1H), 6.78 (dd,  $J$  = 2.8, 1.6 Hz, 1H), 6.75 – 6.70 (m, 2H), 3.92 (s, 2H), 3.67 (s, 4H), 3.45 (s, 2H), 2.94 (s, 6H).

**$^{13}\text{C}$  NMR (101 MHz,  $\text{CDCl}_3$ )**  $\delta$  174.62, 150.43, 136.98, 129.16, 114.76, 113.45, 110.92, 61.08, 60.79, 53.49, 49.75, 40.48.

**HRMS (ESI)** calculated  $\text{C}_{13}\text{H}_{19}\text{N}_2\text{O}^+$   $[\text{M}+\text{H}]^+$  m/z 219.1492, found 219.1490.

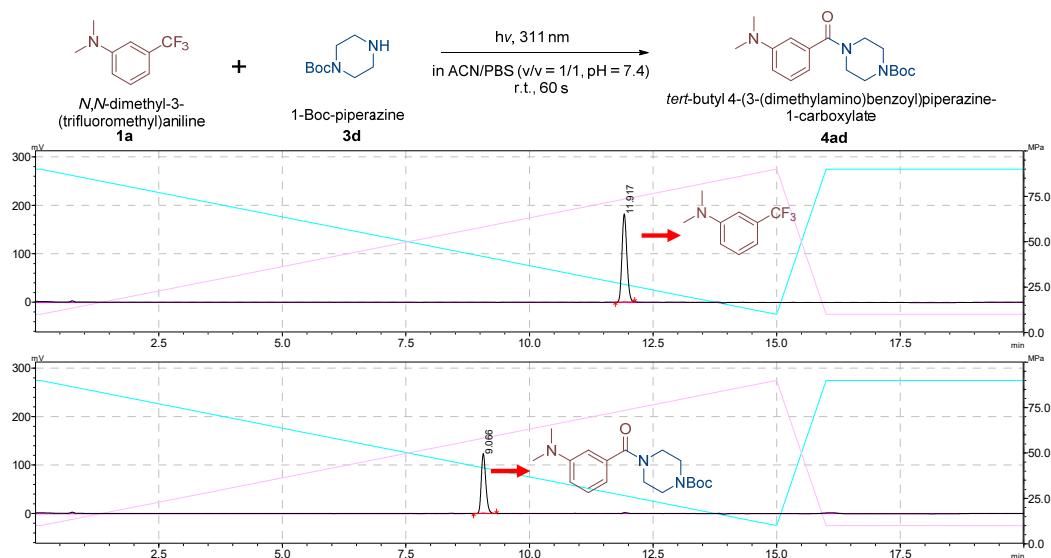

**Figure S63.** HPLC-MS analysis of the photo-DAFEx reaction between **1a** (100  $\mu$ M) and **3d** (500  $\mu$ M) in ACN/PBS (v/v = 1/1, pH = 7.4) upon 311 nm irradiation according to the **general procedure I**.

### Preparation and characterization

*tert*-butyl 4-(3-(dimethylamino)benzoyl)piperazine-1-carboxylate (**4ad**)

**Preparation:** **1a** (31.0 mg, 0.16 mmol) and **3d** (152.7 mg, 0.82 mmol) in 200 mL mixture of ACN/PBS (v/v = 1/1, pH = 7.4) were performed for the **general procedure II**, and **4ad** was isolated by flash chromatography (PE : EtOAc = 2 : 1) as a yellow oil (44.3 mg, 81%).

**<sup>1</sup>H NMR (400 MHz, CDCl<sub>3</sub>)**  $\delta$  7.23 (dd,  $J$  = 8.4, 7.4 Hz, 1H), 6.75 (ddd,  $J$  = 8.4, 2.6, 0.8 Hz, 1H), 6.71 (dd,  $J$  = 2.8, 1.4 Hz, 1H), 6.65 (dt,  $J$  = 7.4, 1.2 Hz, 1H), 3.72 (s, 2H), 3.57 – 3.27 (m, 6H), 2.95 (s, 6H), 1.46 (s, 9H).

**<sup>13</sup>C NMR (101 MHz, CDCl<sub>3</sub>)**  $\delta$  171.41, 154.62, 150.61, 136.30, 129.15, 114.38, 113.60, 110.65, 80.29, 40.42, 28.38.

**HRMS (ESI)** calculated C<sub>18</sub>H<sub>28</sub>N<sub>3</sub>O<sub>3</sub><sup>+</sup> [M+H]<sup>+</sup> m/z 334.2125, found 334.2123.

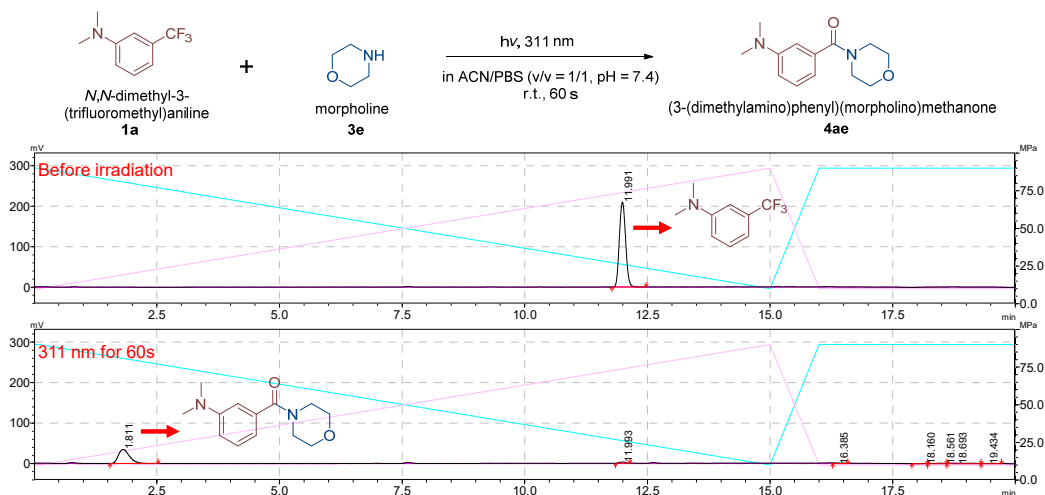

**Figure S64.** HPLC-MS analysis of the photo-DAFEx reaction between **1a** (100  $\mu$ M) and **3e** (500  $\mu$ M) in ACN/PBS (v/v = 1/1, pH = 7.4) upon 311 nm irradiation according to the **general procedure I**.

### Preparation and characterization

(3-(dimethylamino)phenyl)(morpholino)methanone (**4ae**)

**Preparation:** **1a** (31.0 mg, 0.16 mmol) and **3e** (71.4mg, 0.82 mmol) in 200 mL mixture of ACN/PBS (v/v = 1/1, pH = 7.4) were performed for the **general procedure II**, and **4ae** was isolated by flash chromatography (PE : EtOAc = 2 : 1) as a yellow oil (31.1 mg, 81%).

$^1\text{H NMR}$  (400 MHz,  $\text{CDCl}_3$ )  $\delta$  7.23 (ddd,  $J$  = 8.2, 7.4, 0.8 Hz, 1H), 6.77 – 6.71 (m, 2H), 6.66 (dt,  $J$  = 7.6, 1.2 Hz, 1H), 3.87 – 3.36 (m, 8H), 2.96 (s, 6H).

$^{13}\text{C NMR}$  (101 MHz,  $\text{CDCl}_3$ )  $\delta$  171.23, 150.63, 136.18, 129.10, 114.46, 113.58, 110.77, 66.99, 40.44.

**HRMS (ESI)** calculated  $\text{C}_{13}\text{H}_{19}\text{N}_2\text{O}_2^+$   $[\text{M}+\text{H}]^+$  m/z 235.1441, found 235.1439.

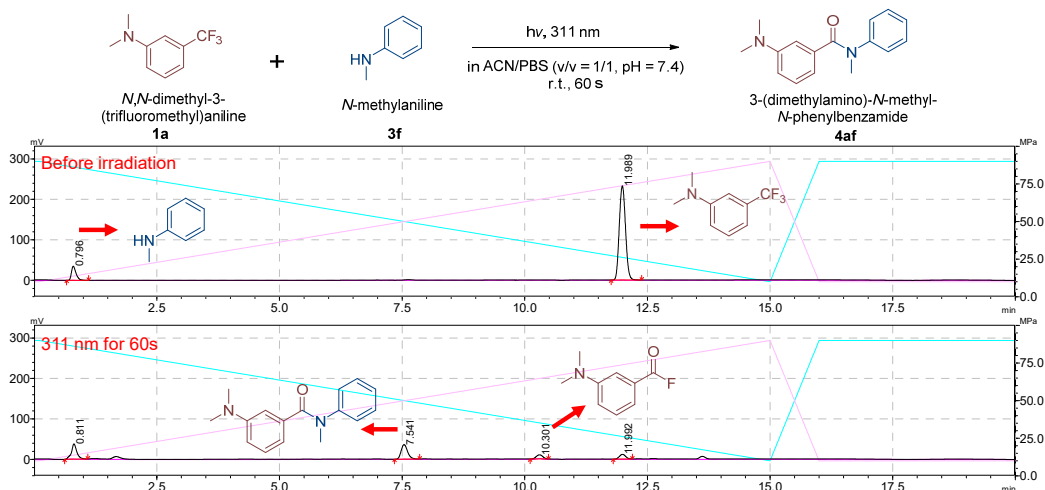

**Figure S65.** HPLC-MS analysis of the photo-DAFEx reaction between **1a** (100  $\mu$ M) and **3f** (500  $\mu$ M) in ACN/PBS (v/v = 1/1, pH = 7.4) upon 311 nm irradiation according to the **general procedure I**.

### Preparation and characterization

3-(dimethylamino)-*N*-methyl-*N*-phenylbenzamide (**4af**)

**Preparation:** **1a** (31.0 mg, 0.16 mmol) and **3f** (87.9 mg, 0.82 mmol) in 200 mL mixture of ACN/PBS (v/v = 1/1, pH = 7.4) were performed for the **general procedure II**, and **4af** was isolated by flash chromatography (PE : EtOAc = 2 : 1) as a yellow oil (33.2 mg, 80%).

**$^1\text{H}$  NMR (400 MHz,  $\text{CDCl}_3$ )**  $\delta$  7.25 – 7.19 (m, 2H), 7.16 – 7.10 (m, 1H), 7.06 (dd,  $J$  = 8.6, 1.4 Hz, 2H), 6.99 (t,  $J$  = 7.8 Hz, 1H), 6.69 (dd,  $J$  = 2.6, 1.4 Hz, 1H), 6.60 (dt,  $J$  = 8.2, 2.2 Hz, 2H), 3.49 (s, 3H), 2.80 (s, 6H).

**$^{13}\text{C}$  NMR (101 MHz,  $\text{CDCl}_3$ )**  $\delta$  171.31, 149.89, 145.32, 136.38, 129.05, 128.30, 126.74, 126.24, 117.18, 113.76, 113.24, 40.45, 38.43.

**HRMS (ESI)** calculated  $\text{C}_{16}\text{H}_{19}\text{N}_2\text{O}^+$   $[\text{M}+\text{H}]^+$   $m/z$  255.1492, found 255.1489.



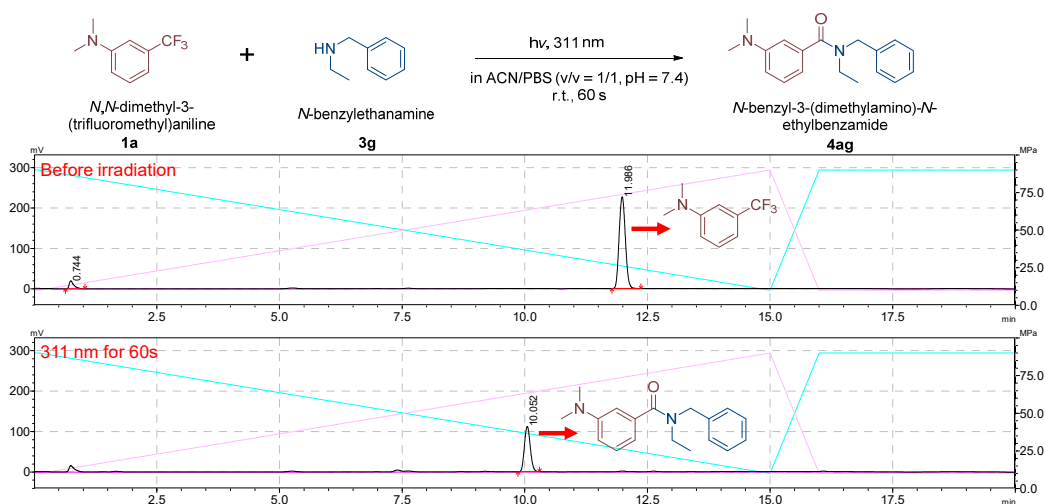

**Figure S66.** HPLC-MS analysis of the photo-DAFEx reaction between **1a** (100  $\mu$ M) and **3g** (500  $\mu$ M) in ACN/PBS ( $v/v = 1/1$ , pH = 7.4) upon 311 nm irradiation according to the **general procedure I**.

### Preparation and characterization

*N*-benzyl-3-(dimethylamino)-*N*-ethylbenzamide (**4ag**)

**Preparation:** **1a** (31.0 mg, 0.16 mmol) and **3g** (110.9 mg, 0.82 mmol) in 200 mL mixture of ACN/PBS ( $v/v = 1/1$ , pH = 7.4) were performed for the **general procedure II**, and **4ag** was isolated by flash chromatography (PE : EtOAc = 2 : 1) as a yellow oil (38.7 mg, 84%).

**$^1\text{H}$  NMR (400 MHz, DMSO- $d_6$ )**  $\delta$  7.35 (d,  $J = 6.4$  Hz, 3H), 7.31 – 7.17 (m, 3H), 6.75 (s, 1H), 6.68 – 6.61 (m, 2H), 4.57 (d,  $J = 82.0$  Hz, 2H), 3.25 (d,  $J = 86.2$  Hz, 2H), 2.97 – 2.67 (m, 6H), 1.15 – 0.93 (m, 3H).

**$^{13}\text{C}$  NMR (101 MHz, CDCl $_3$ )**  $\delta$  173.08, 150.47, 136.87, 129.20, 128.80, 128.71, 128.44, 128.21, 127.48, 127.00, 114.41, 113.54, 110.46, 53.16, 51.54, 46.93, 40.37.

**HRMS (ESI)** calculated C $_{18}$ H $_{23}$ N $_2$ O $^+$  [M+H] $^+$   $m/z$  283.1805, found 283.1803.

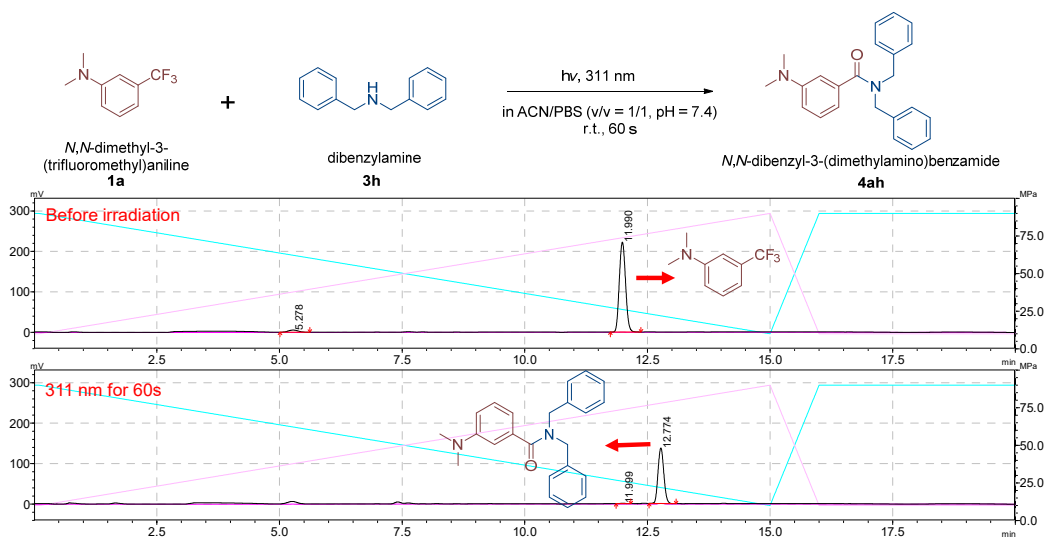

**Figure S67.** HPLC-MS analysis of the photo-DAFEx reaction between **1a** (100  $\mu\text{M}$ ) and **3h** (500  $\mu\text{M}$ ) in ACN/PBS ( $v/v = 1/1$ ,  $\text{pH} = 7.4$ ) upon 311 nm irradiation according to the **general procedure I**.

### Preparation and characterization

*N,N*-dibenzyl-3-(dimethylamino)benzamide (**4ah**)

**Preparation:** **1a** (31.0 mg, 0.16 mmol) and **3h** (161.8 mg, 0.82 mmol) in 200 mL mixture of ACN/PBS ( $v/v = 1/1$ ,  $\text{pH} = 7.4$ ) were performed for the **general procedure II**, and **4ah** was isolated by flash chromatography (PE : EtOAc = 2 : 1) as a yellow oil (48.5 mg, 86%).

$^1\text{H NMR}$  (400 MHz,  $\text{CDCl}_3$ )  $\delta$  7.35 – 7.12 (m, 11H), 6.83 – 6.77 (m, 2H), 6.69 (ddd,  $J = 8.4, 2.6, 0.8$  Hz, 1H), 4.71 (s, 2H), 4.42 (s, 2H), 2.82 (s, 6H).

$^{13}\text{C NMR}$  (101 MHz,  $\text{CDCl}_3$ )  $\delta$  173.10, 150.47, 136.90, 129.26, 128.85, 128.76, 128.50, 128.47, 128.25, 127.54, 127.06, 127.04, 114.41, 113.58, 110.46, 51.60, 47.01, 40.38.

**HRMS (ESI)** calculated  $\text{C}_{23}\text{H}_{25}\text{N}_2\text{O}^+$   $[\text{M}+\text{H}]^+$   $m/z$  345.1961, found 345.1962.

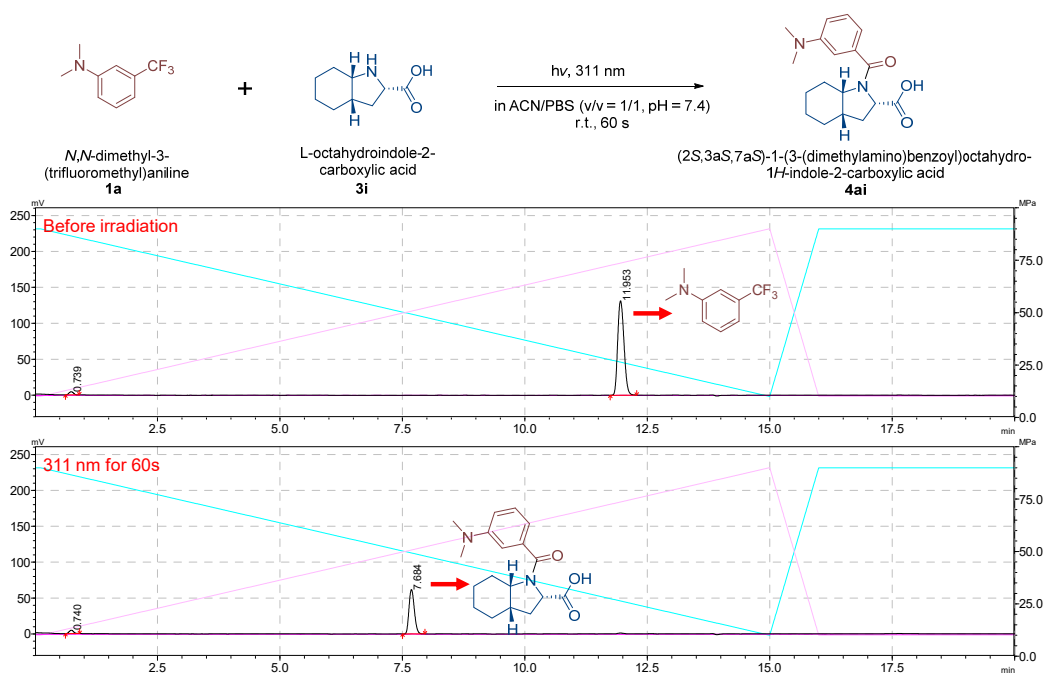

**Figure S68.** HPLC-MS analysis of the photo-DAFEx reaction between **1a** (100  $\mu\text{M}$ ) and **3i** (500  $\mu\text{M}$ ) in ACN/PBS (v/v = 1/1, pH = 7.4) upon 311 nm irradiation according to the **general procedure I**.

### Preparation and characterization

(2*S*,3*aS*,7*aS*)-1-(3-(dimethylamino)benzoyl)octahydro-1*H*-indole-2-carboxylic acid (**4hi**)

**Preparation:** **1a** (31.0 mg, 0.16 mmol) and **3i** (138.8 mg, 0.82 mmol) in 200 mL mixture of ACN/PBS (v/v = 1/1, pH = 7.4) were performed for the **general procedure II**, and **4hi** was isolated by flash chromatography (DCM : MeOH = 10 : 1) as a white solid (40.4 mg, 78%).

**<sup>1</sup>H NMR (400 MHz, DMSO-*d*<sub>6</sub>)**  $\delta$  7.21 (t, *J* = 7.8 Hz, 1H), 6.76 (d, *J* = 8.4 Hz, 1H), 6.62 (dd, *J* = 4.6, 3.2 Hz, 2H), 4.41 (dd, *J* = 9.8, 8.4 Hz, 1H), 3.55 (s, 1H), 2.90 (s, 6H), 2.33 (dt, *J* = 13.4, 6.6 Hz, 1H), 2.27 – 2.12 (m, 1H), 1.93 (td, *J* = 12.6, 9.8 Hz, 1H), 1.74 – 1.42 (m, 5H), 1.40 – 1.11 (m, 2H), 0.88 (q, *J* = 13.4, 12.7 Hz, 1H).

**<sup>13</sup>C NMR (101 MHz, DMSO-*d*<sub>6</sub>)**  $\delta$  174.04, 169.78, 150.39, 138.43, 129.28, 114.03, 113.37, 109.99, 59.33, 58.68, 40.47, 37.35, 30.58, 28.55, 25.59, 23.86, 20.05.

**HRMS (ESI)** calculated C<sub>18</sub>H<sub>25</sub>N<sub>2</sub>O<sub>3</sub><sup>+</sup> [M+H]<sup>+</sup> *m/z* 317.1860, found 317.1857.

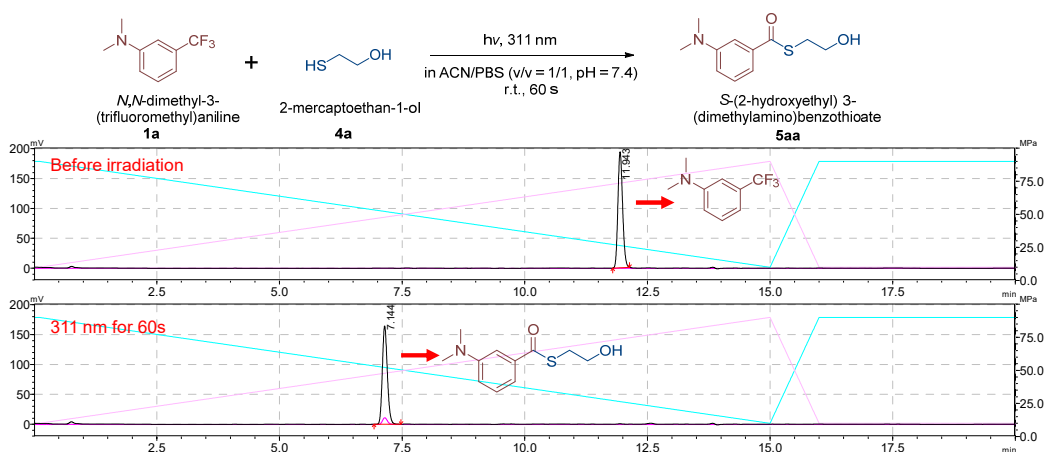

**Figure S69.** HPLC-MS analysis of the photo-DAFEx reaction between **1a** (100  $\mu\text{M}$ ) and **4a** (500  $\mu\text{M}$ ) in ACN/PBS (v/v = 1/1, pH = 7.4) upon 311 nm irradiation according to the **general procedure I**.

### Preparation and characterization

*S*-(2-hydroxyethyl) 3-(dimethylamino)benzothioate (**5aa**)

**Preparation:** **1a** (31.0 mg, 0.16 mmol) and **4a** (64.1 mg, 0.82 mmol) in 200 mL mixture of ACN/PBS (v/v = 1/1, pH = 7.4) were performed for the **general procedure II**, and **5aa** was isolated by flash chromatography (DCM : MeOH = 10 : 1) as a yellow oil (31.1 mg, 84%).

$^1\text{H NMR}$  (400 MHz,  $\text{CDCl}_3$ )  $\delta$  7.35 – 7.24 (m, 3H), 6.92 (ddd,  $J$  = 7.8, 2.8, 1.2 Hz, 1H), 3.85 (t,  $J$  = 6.0 Hz, 2H), 3.26 (t,  $J$  = 6.2 Hz, 2H), 2.99 (s, 6H).

$^{13}\text{C NMR}$  (101 MHz,  $\text{CDCl}_3$ )  $\delta$  193.07, 150.53, 137.61, 129.28, 117.35, 115.53, 110.36, 61.96, 40.48, 31.96.

**HRMS (ESI)** calculated  $\text{C}_{11}\text{H}_{16}\text{NO}_2\text{S}^+$   $[\text{M}+\text{H}]^+$  m/z 226.0896, found 226.0895.

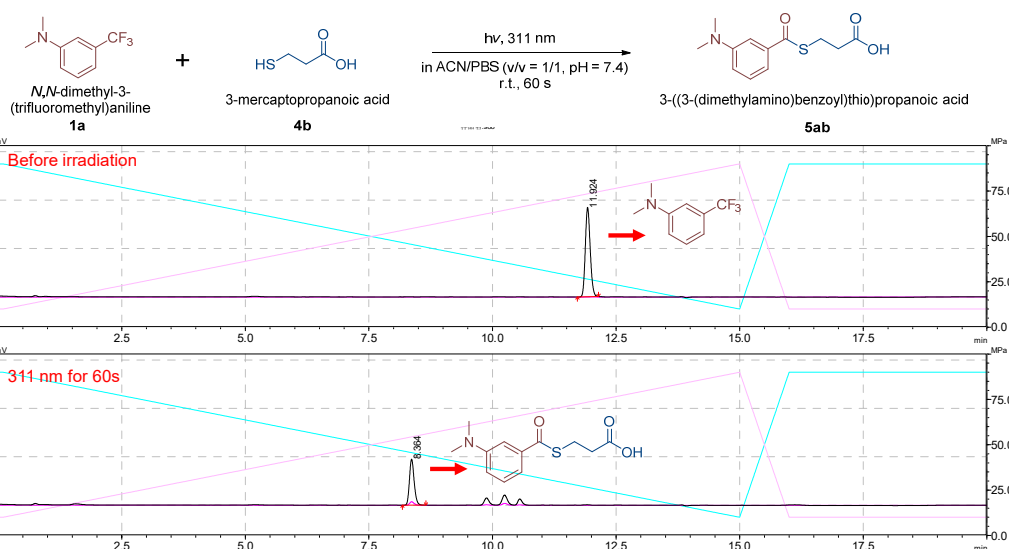

**Figure S70.** HPLC-MS analysis of the photo-DAFEx reaction between **1a** (100  $\mu$ M) and **4b** (500  $\mu$ M) in ACN/PBS (v/v = 1/1, pH = 7.4) upon 311 nm irradiation according to the **general procedure I**.

### Preparation and characterization

#### 3-((3-(dimethylamino)benzoyl)thio)propanoic acid (**5ab**)

**Preparation:** **1a** (31.0 mg, 0.16 mmol) and **4b** (87.0 mg, 0.82 mmol) in 200 mL mixture of ACN/PBS (v/v = 1/1, pH = 7.4) were performed for the **general procedure II**, and **5ab** was isolated by flash chromatography (DCM : MeOH = 10 : 1) as a yellow solid (27.1 mg, 65%).

**$^1\text{H}$  NMR (400 MHz, DMSO- $d_6$ )**  $\delta$  7.37 – 7.30 (m, 1H), 7.19 (ddd,  $J$  = 7.6, 1.6, 0.8 Hz, 1H), 7.11 (dd,  $J$  = 2.6, 1.6 Hz, 1H), 7.02 (ddd,  $J$  = 8.4, 2.8, 0.8 Hz, 1H), 3.18 (t,  $J$  = 6.8 Hz, 2H), 2.95 (s, 6H), 2.60 (t,  $J$  = 6.8 Hz, 2H).

**$^{13}\text{C}$  NMR (101 MHz, DMSO- $d_6$ )**  $\delta$  192.13, 173.44, 150.88, 137.68, 130.03, 117.83, 114.86, 109.57, 34.53, 24.46.

**HRMS (ESI)** calculated  $\text{C}_{12}\text{H}_{16}\text{NO}_3\text{S}^+$   $[\text{M}+\text{H}]^+$  m/z 254.0845, found 254.0845.

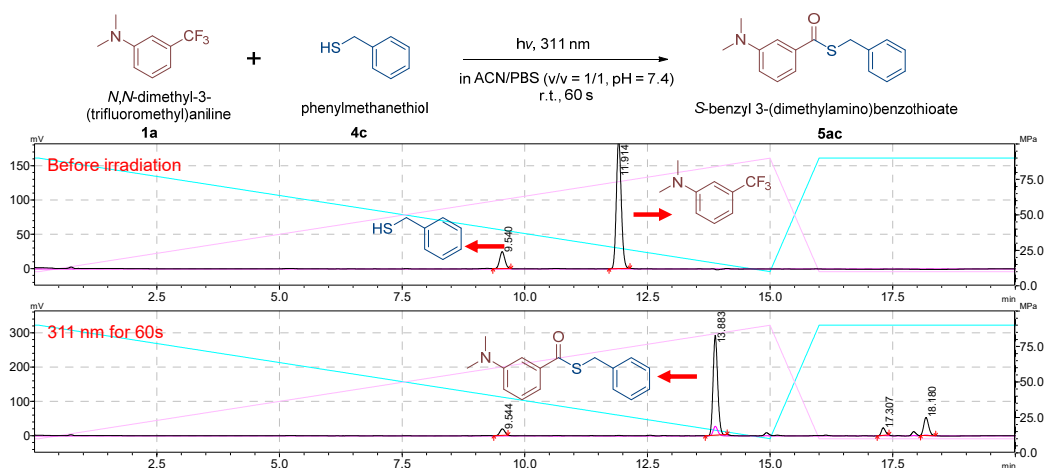

**Figure S71.** HPLC-MS analysis of the photo-DAFEx reaction between **1a** (100  $\mu\text{M}$ ) and **4c** (500  $\mu\text{M}$ ) in ACN/PBS ( $v/v = 1/1$ ,  $\text{pH} = 7.4$ ) upon 311 nm irradiation according to the **general procedure I**.

### Preparation and characterization

*S*-benzyl 3-(dimethylamino)benzothioate (**5ac**)

**Preparation:** **1a** (31.0 mg, 0.16 mmol) and **4c** (101.8 mg, 0.82 mmol) in 200 mL mixture of ACN/PBS ( $v/v = 1/1$ ,  $\text{pH} = 7.4$ ) were performed for the **general procedure II**, and **5ac** was isolated by flash chromatography (PE : EtOAc = 2 : 1) as a yellow oil (27.1 mg, 68%).

$^1\text{H NMR}$  (400 MHz,  $\text{CDCl}_3$ )  $\delta$  7.39 – 7.35 (m, 2H), 7.32 – 7.27 (m, 3H), 7.27 – 7.20 (m, 3H), 6.89 (ddd,  $J = 7.8, 2.8, 1.3$  Hz, 1H), 4.29 (s, 2H), 2.97 (s, 6H).

$^{13}\text{C NMR}$  (101 MHz,  $\text{CDCl}_3$ )  $\delta$  192.16, 150.56, 137.70, 137.63, 129.25, 129.01, 128.63, 127.26, 117.18, 115.46, 110.38, 40.48, 33.41.

**HRMS (ESI)** calculated  $\text{C}_{16}\text{H}_{17}\text{KNOS}^+ [\text{M}+\text{K}]^+$   $m/z$  310.0662, found 310.0670.

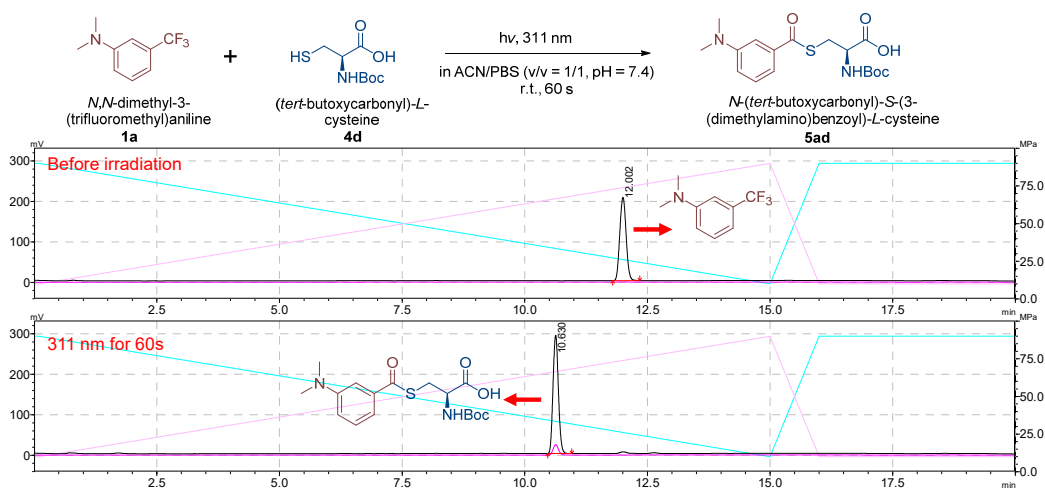

**Figure S72.** HPLC-MS analysis of the photo-DAFEx reaction between **1a** (100  $\mu$ M) and **4d** (500  $\mu$ M) in ACN/PBS (v/v = 1/1, pH = 7.4) upon 311 nm irradiation according to the **general procedure I**.

### Preparation and characterization

*N*-(tert-butoxycarbonyl)-*S*-(3-(dimethylamino)benzoyl)-L-cysteine (**5ad**)

**Preparation:** **1a** (31.0 mg, 0.16 mmol) and **4d** (181.4 mg, 0.82 mmol) in 200 mL mixture of ACN/PBS (v/v = 1/1, pH = 7.4) were performed for the **general procedure II**, and **5ad** was isolated by flash chromatography (PE : EtOAc = 2 : 1) as a yellow oil (49.8 mg, 83%).

**<sup>1</sup>H NMR (400 MHz, CDCl<sub>3</sub>)**  $\delta$  8.04 (s, 1H), 7.33 (dt,  $J$  = 7.8, 1.4 Hz, 1H), 7.29 (d,  $J$  = 7.8 Hz, 2H), 6.98 – 6.92 (m, 1H), 4.67 – 4.54 (m, 1H), 3.62 (dd,  $J$  = 14.2, 4.5 Hz, 1H), 3.49 (dd,  $J$  = 14.4, 6.8 Hz, 1H), 2.98 (s, 6H), 1.42 (s, 9H).

**<sup>13</sup>C NMR (101 MHz, CDCl<sub>3</sub>)**  $\delta$  192.13, 174.12, 155.78, 150.35, 137.35, 129.36, 117.94, 116.23, 110.95, 80.55, 53.60, 40.75, 30.75, 28.28.

**HRMS (ESI)** calculated C<sub>17</sub>H<sub>25</sub>N<sub>2</sub>O<sub>5</sub>S<sup>+</sup> [M+H]<sup>+</sup> m/z 369.1479, found 369.1477.

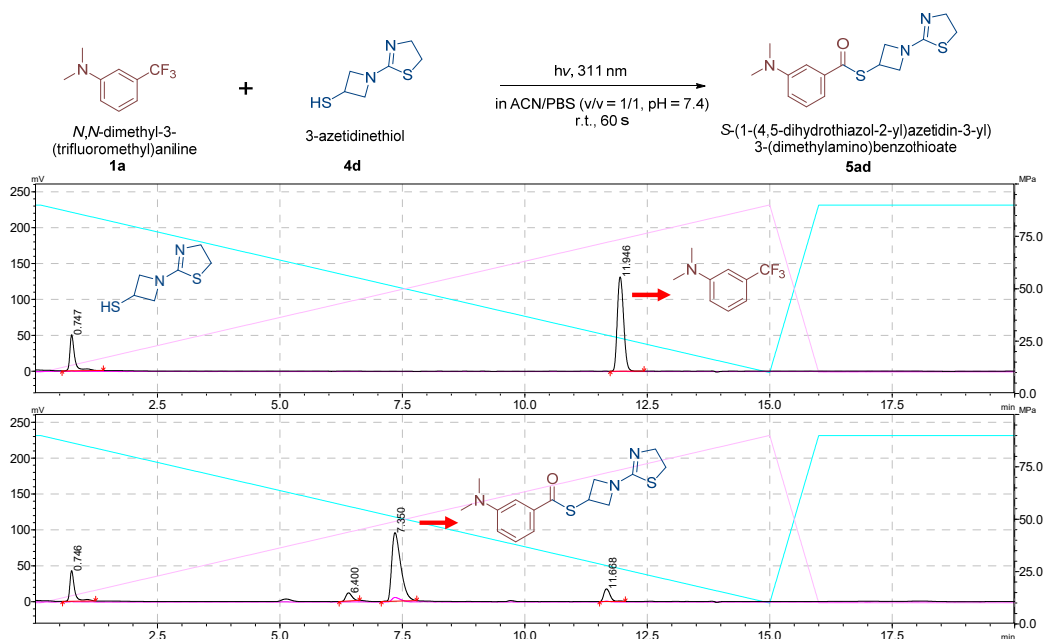

**Figure S73.** HPLC-MS analysis of the photo-DAFEx reaction between **1a** (100  $\mu\text{M}$ ) and **4e** (500  $\mu\text{M}$ ) in ACN/PBS ( $v/v = 1/1$ ,  $\text{pH} = 7.4$ ) upon 311 nm irradiation according to the **general procedure I**.

### Preparation and characterization

S-(1-(4,5-dihydrothiazol-2-yl)azetid-3-yl) 3-(dimethylamino)benzothioate (**5ae**)

**Preparation:** **1a** (31.0 mg, 0.16 mmol) and **4e** (142.9 mg, 0.82 mmol) in 200 mL mixture of ACN/PBS ( $v/v = 1/1$ ,  $\text{pH} = 7.4$ ) were performed for the **general procedure II**, and **5ae** was isolated by flash chromatography (PE : EtOAc = 2 : 1) as a yellow oil (29.3 mg, 56%).

$^1\text{H NMR}$  (400 MHz,  $\text{DMSO-}d_6$ )  $\delta$  7.38 – 7.29 (m, 1H), 7.17 (ddd,  $J = 7.6, 1.6, 0.8$  Hz, 1H), 7.08 (dd,  $J = 2.6, 1.6$  Hz, 1H), 7.03 (ddd,  $J = 8.4, 2.6, 0.8$  Hz, 1H), 4.49 – 4.33 (m, 3H), 3.88 (t,  $J = 7.6$  Hz, 2H), 3.86 – 3.81 (m, 2H), 3.34 (d,  $J = 7.5$  Hz, 2H), 2.94 (s, 6H).

$^{13}\text{C NMR}$  (101 MHz,  $\text{DMSO-}d_6$ )  $\delta$  191.60, 163.13, 150.91, 137.18, 130.15, 118.12, 114.91, 109.56, 61.17, 58.72, 40.38, 36.27, 32.21.

**HRMS (ESI)** calculated  $\text{C}_{15}\text{H}_{20}\text{N}_3\text{OS}_2^+$   $[\text{M}+\text{H}]^+$   $m/z$  322.1042, found 322.1040.



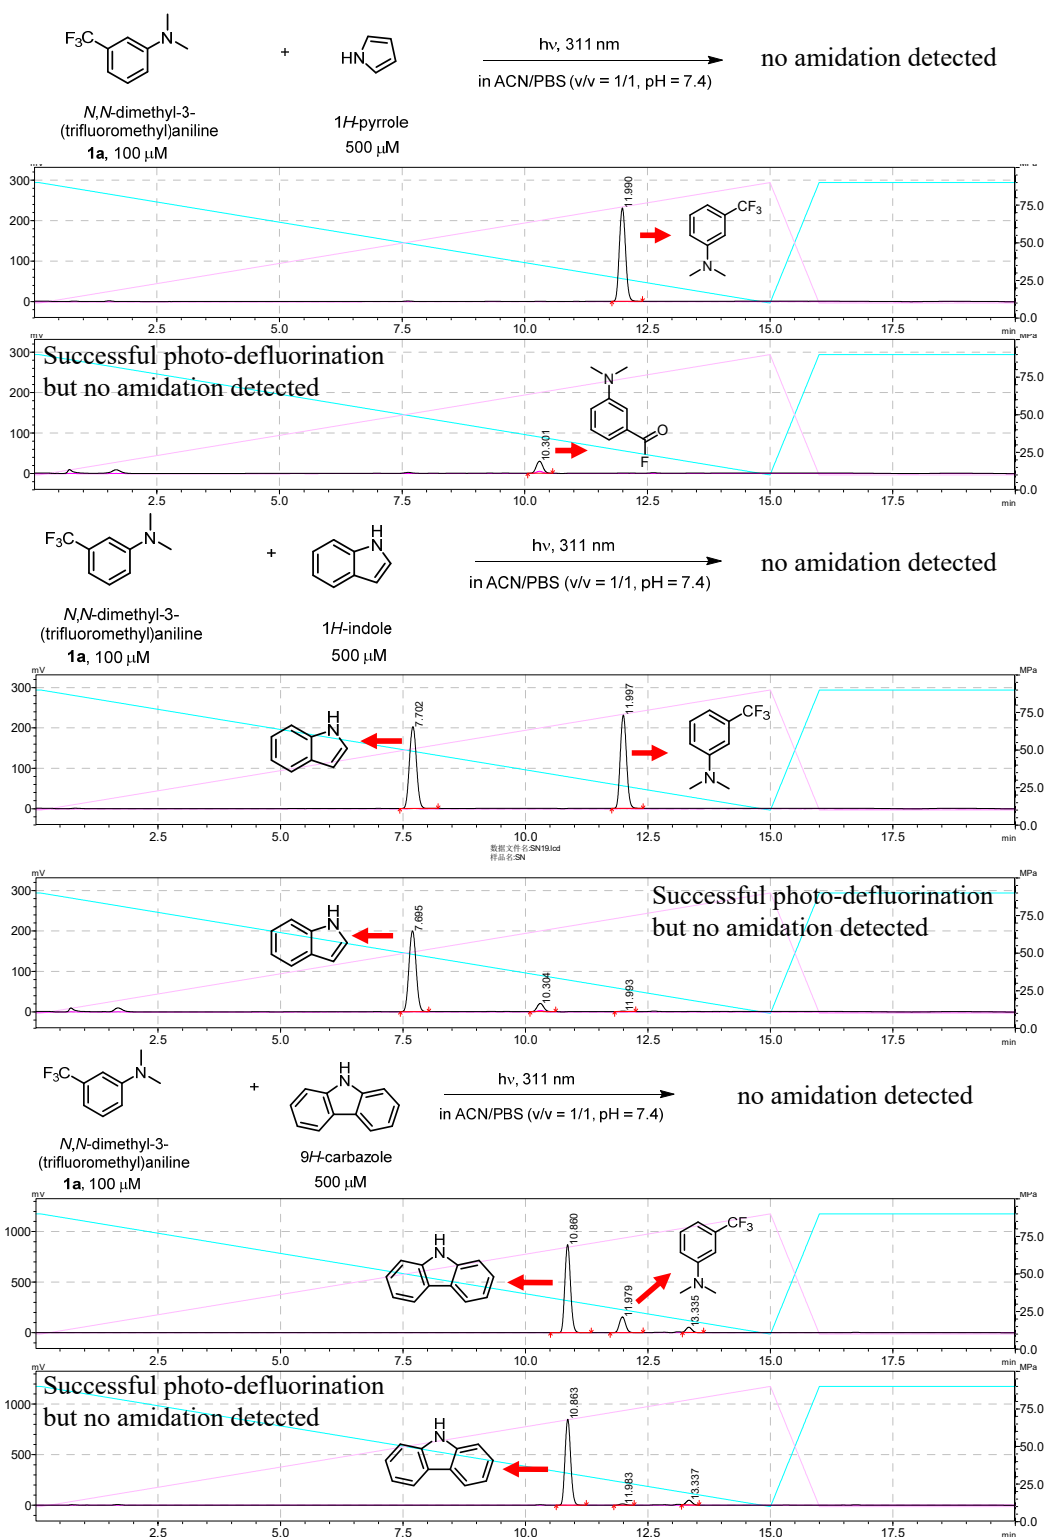

**Figure S74.** HPLC-MS analysis of the photo-DAFEx reaction between **1a** (100  $\mu\text{M}$ ) and pyrrole/indole/carbazole (500  $\mu\text{M}$ ) in ACN/PBS (v/v = 1/1, pH = 7.4) upon 311 nm irradiation according to the general procedure I.

## 4. Peptide cyclization and modification via the photo-DAFEx reactions

### 4.1 Studies on the chemical selectivity of the photo-DAFEx reaction toward natural amino acids (NAAs)

Stock solution:

- ✓ *N*-Boc protected NAAs in PBS (5.0 mM for each one);
- ✓ **1a** (1.0 mM) in ACN/PBS (v/v = 1/1, pH = 7.4).

100  $\mu$ L of **1a** stock solution, 100  $\mu$ L of *N*-Boc protected NAAs stock solutions and 800  $\mu$ L ACN/PBS (v/v = 1/1, pH = 7.4) were mixed and irradiated with the 311 nm lamp (5.9 mW cm<sup>-2</sup>, single wavelength output after an optical filter) in a quartz test tube ( $\varphi$  = 0.8 cm,  $l$  = 8.0 cm optical path) for 60 s. The sample was collected and was subjected to HPLC-MS analysis, and the yields were determined by external standard calibration.

**Table S6.** The reactivity screening for the photo-DAFEx chemistry (**5a**) towards natural amino acid residues based on HPLC-MS analysis.

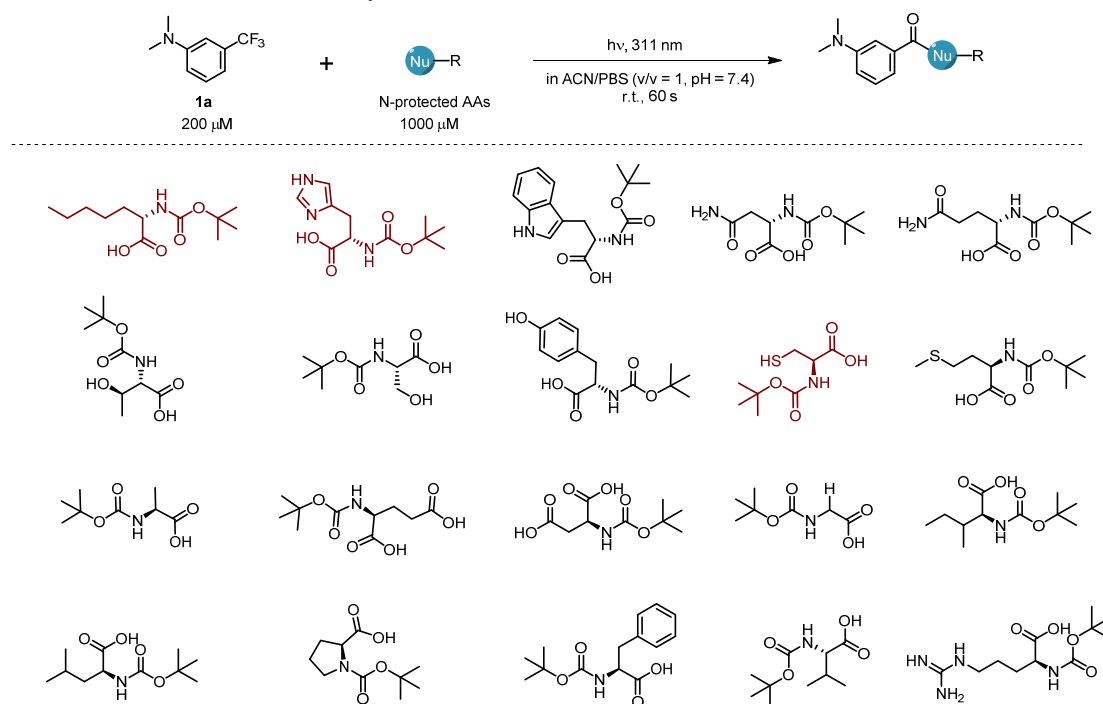

Note: **1a** (100  $\mu$ M) and one selected natural amino acid (500  $\mu$ M) in 1.0 mL of ACN/PBS (v/v = 1/1, pH = 7.4) solution were irradiated with the 311 nm lamp (5.9 mW cm<sup>-2</sup>, single wavelength output after an optical filter) in a quartz test tube ( $\varphi$  = 0.8 cm,  $l$  = 8.0 cm optical path) for 60 s. Then the sample was collected for HPLC-MS analysis.

### 4.2 Competitive reactions among the preferred NAAs

NAAs stock solution:

- ✓ *N*-terminal Boc protected L-histidine, L-cysteine and L-lysine in PBS (5.0 mM for each one);
- ✓ *N*-terminal Boc protected L-cysteine and L-lysine in PBS (5.0 mM for each one);
- ✓ *N*-terminal Boc protected L-histidine and L-lysine in PBS (5.0 mM for each one);
- ✓ *N*-terminal Boc protected L-histidine and L-cysteine in PBS (5.0 mM for each one).

Reactant stock solution: **1a** (1.0 mM) in ACN/PBS (v/v = 1/1, pH = 7.4).

100  $\mu\text{L}$  of **1a** stock solution, 100  $\mu\text{L}$  of AAs stock solutions and 800  $\mu\text{L}$  ACN/PBS (v/v = 1/1, pH = 7.4) were mixed and irradiated with the 311 nm lamp ( $5.9 \text{ mW cm}^{-2}$ , single wavelength output after an optical filter) in a quartz test tube ( $\varphi = 0.8 \text{ cm}$ ,  $l = 8.0 \text{ cm}$  optical path) for 60 s. The sample was collected for HPLC-MS analysis, and the yields were determined by external calibration.

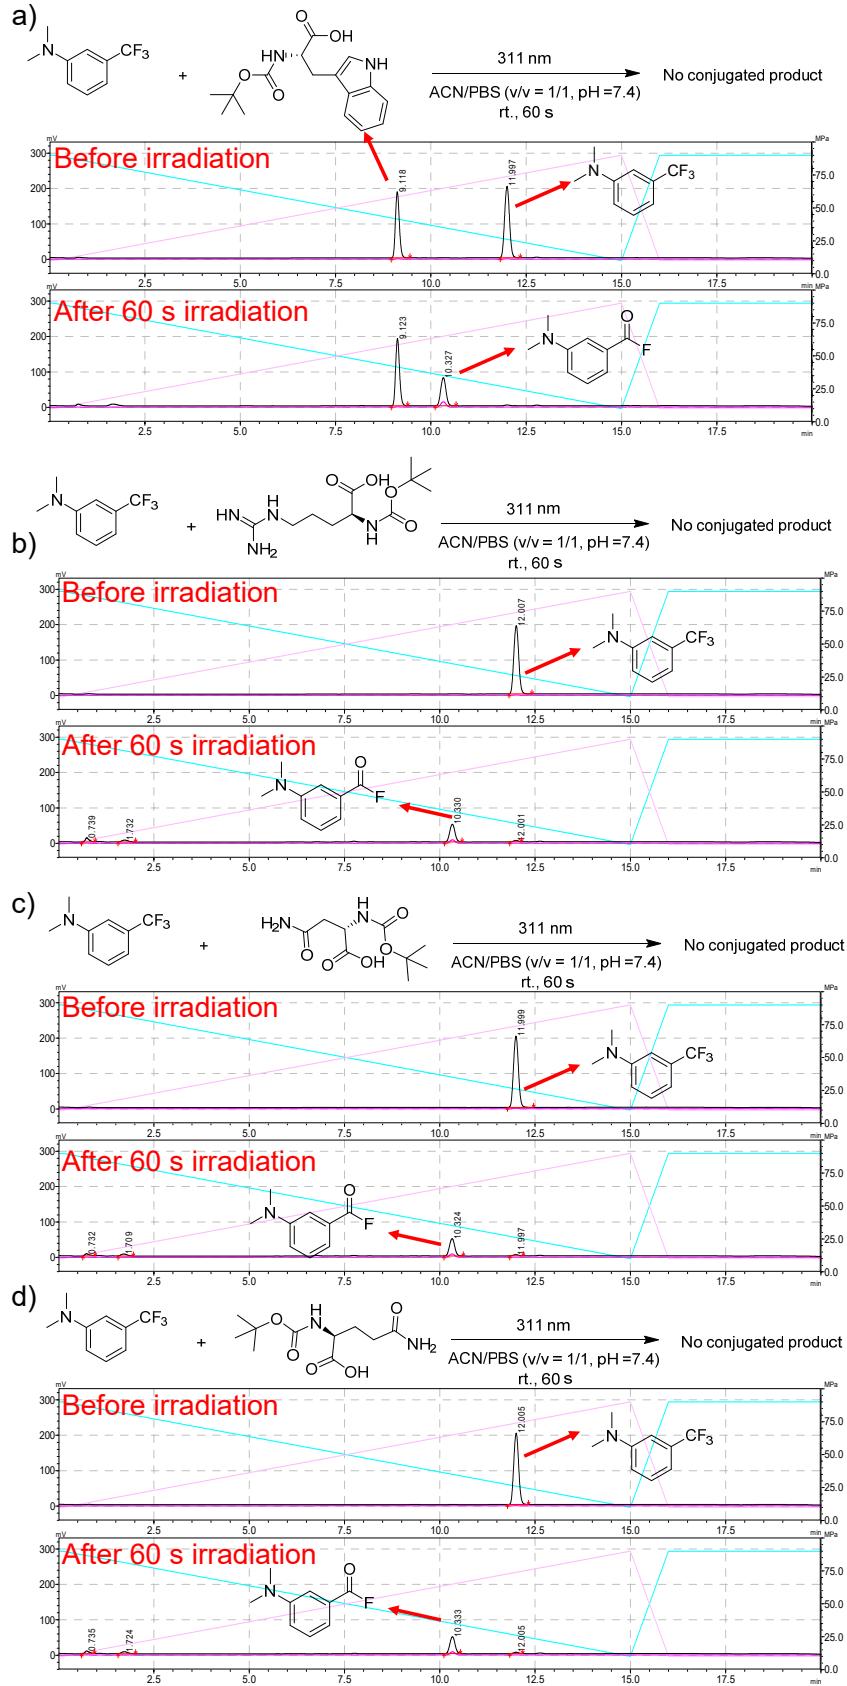

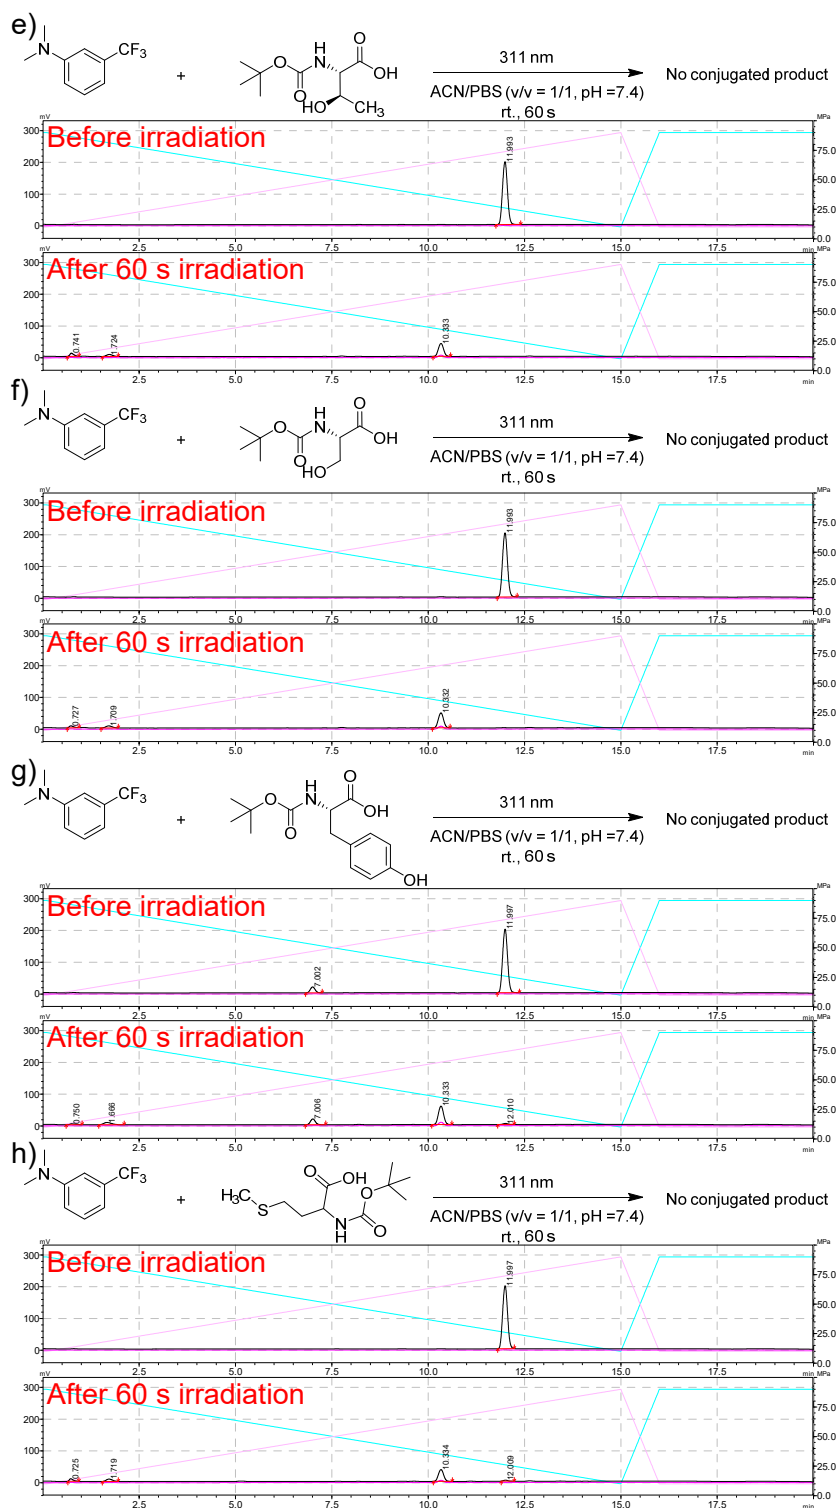

**Figure S75.** HPLC-MS results for screening the photo-DAFEx reaction between **1a** (100  $\mu$ M) and the *N*-terminal Boc protected NAAs in ACN/PBS ( $v/v = 1/1$ ,  $pH = 7.4$ ).

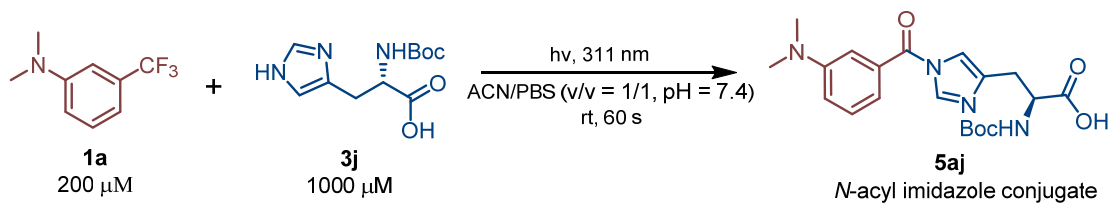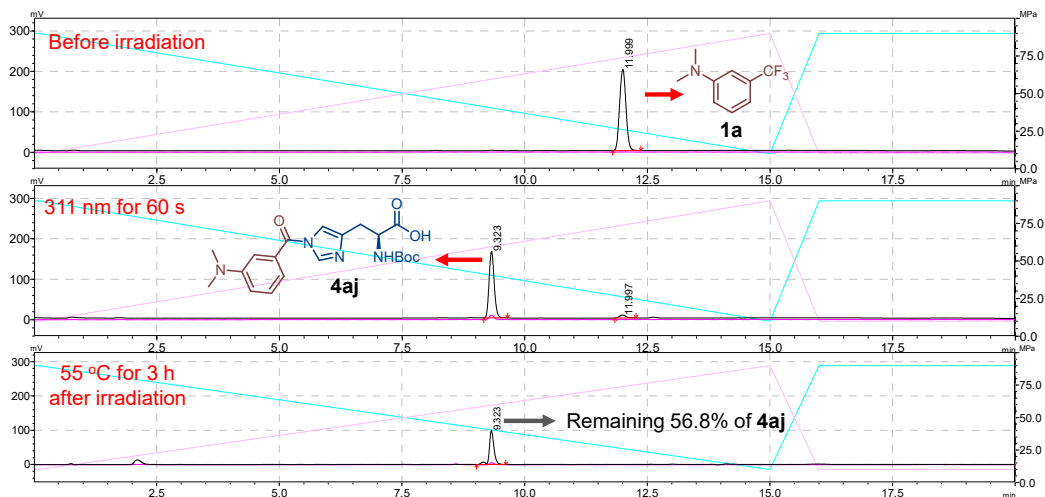

| Item                            | Peak No. | Retention Time (min) | Integrated Area |
|---------------------------------|----------|----------------------|-----------------|
| Before irradiation              | 1        | 11.999               | 1797506         |
| 311 nm for 60 s                 | 2        | 9.323                | 1175588         |
|                                 | 3        | 11.997               | 65071           |
| 55 °C for 3 h after irradiation | 4        | 9.323                | 668035          |

**Figure S76.** HPLC-MS results for the photo-DAFEx reaction between **1a** (200  $\mu$ M) and *N*-terminal Boc protected histidine (1000  $\mu$ M) in ACN/PBS (v/v = 1/1, pH = 7.4), and subsequent stability test under 55 °C incubation for 3 h in ACN/PBS (v/v = 1/1, pH = 7.4). The stability test was started after the complete formation of **4aj** via the photo-DAFEx from **1a**.

In attempting to isolate the **4aj**, we found that the desired conjugate **4aj** is hydrolysed in water containing solvent system during the concentration procedure. After trying for several time, we were unable to obtain an isolated **4aj** as a pure compound for characterization via  $^1\text{H}$  and  $^{13}\text{C}$  NMR.

### 4.3 Peptide cyclization via intramolecular photo-DAFEx reactions

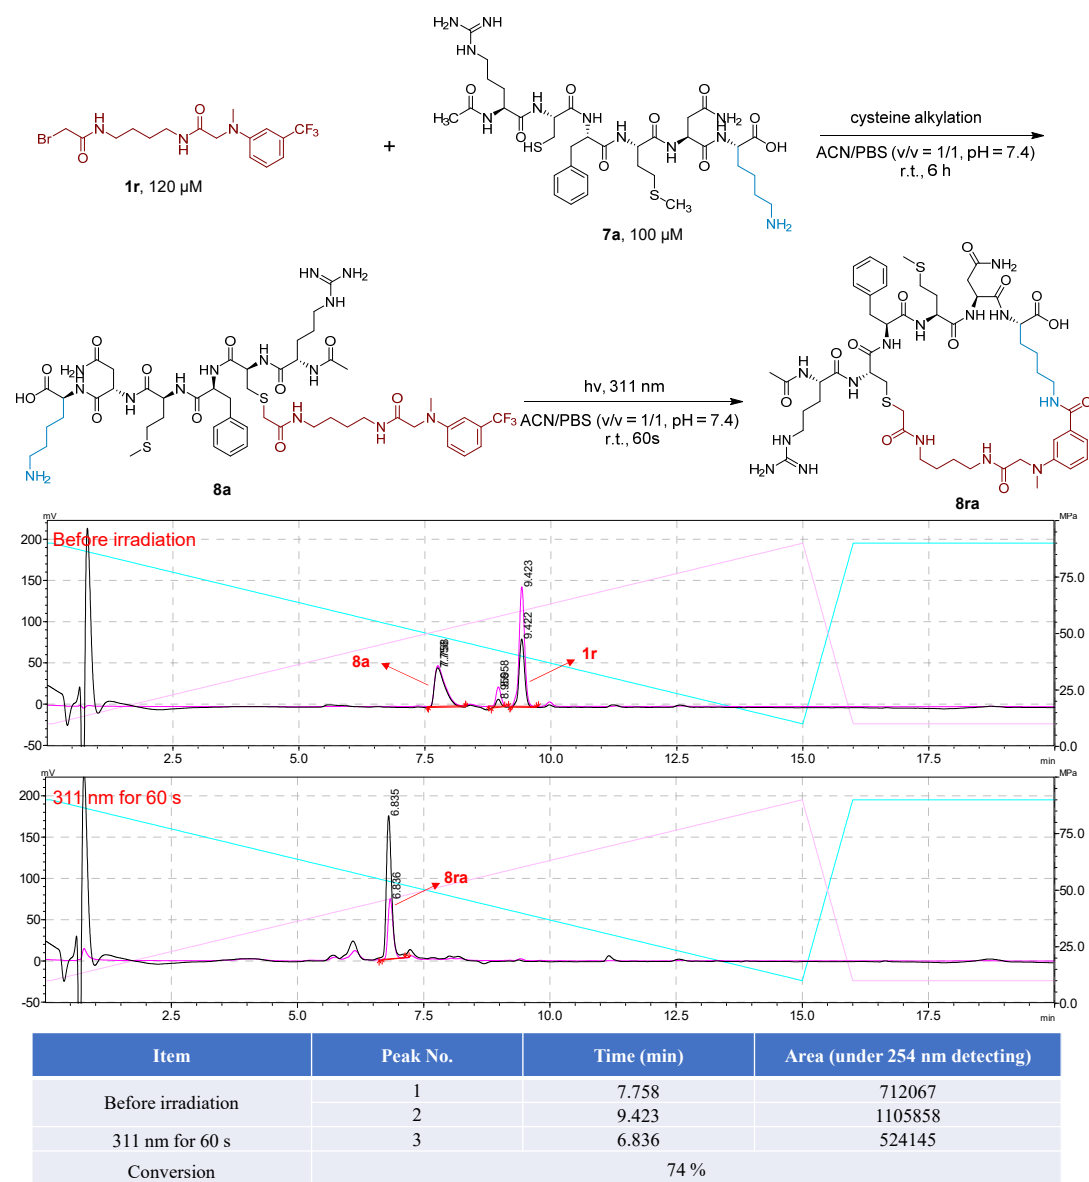

**Figure S77.** Schematic illustration of peptide, Ac-RCFMNK-COOH, cyclization and corresponding HPLC traces for determination of the conversion. Reaction conditions: **1r** (120  $\mu\text{M}$ ) and **7a** (100  $\mu\text{M}$ ) in 1.0 mL of ACN/PBS (v/v = 1/1, pH = 7.4) solution were incubated at 37  $^{\circ}\text{C}$  to alkylate the cysteine residue on the peptide. After incubation for 6 h, the mixture was irradiated with the 311 nm lamp (5.9  $\text{mW cm}^{-2}$ , single wavelength output after an optical filter) in a quartz test tube ( $\varphi = 0.8$  cm,  $l = 8.0$  cm optical path) for 60 s. The resulting sample was collected for HPLC-MS analysis, and the conversion was determined by the integrated area ratio between **8a** and **8ra** in the HPLC traces.

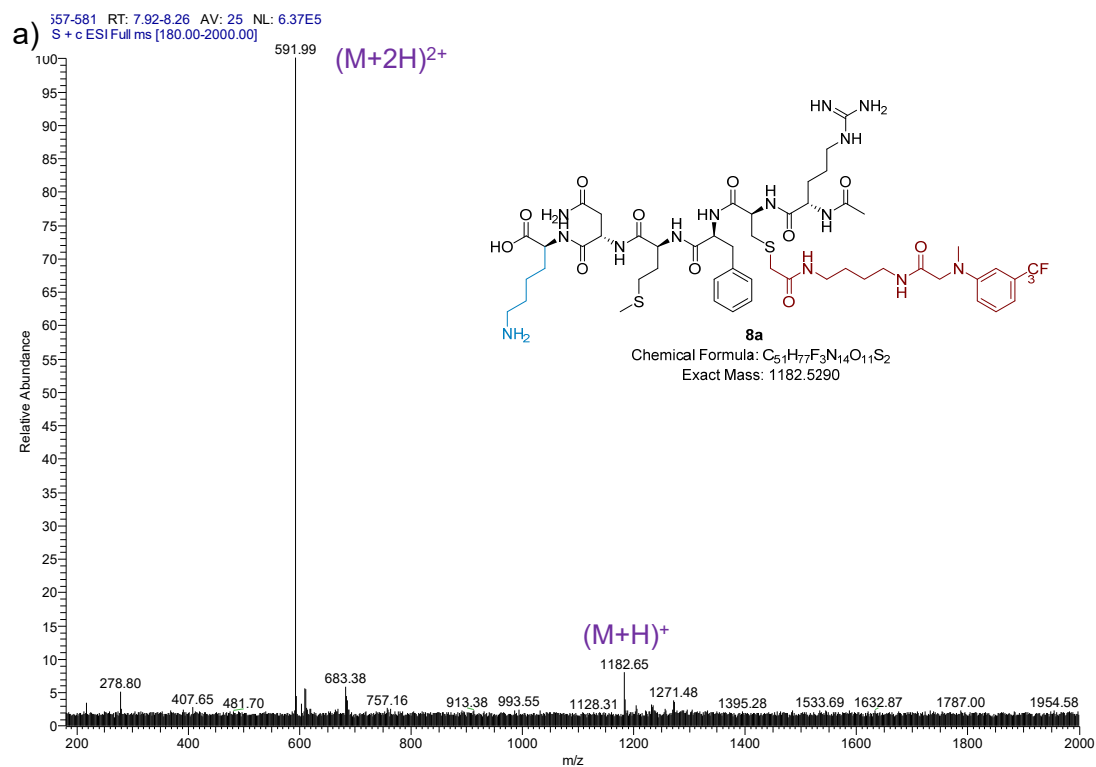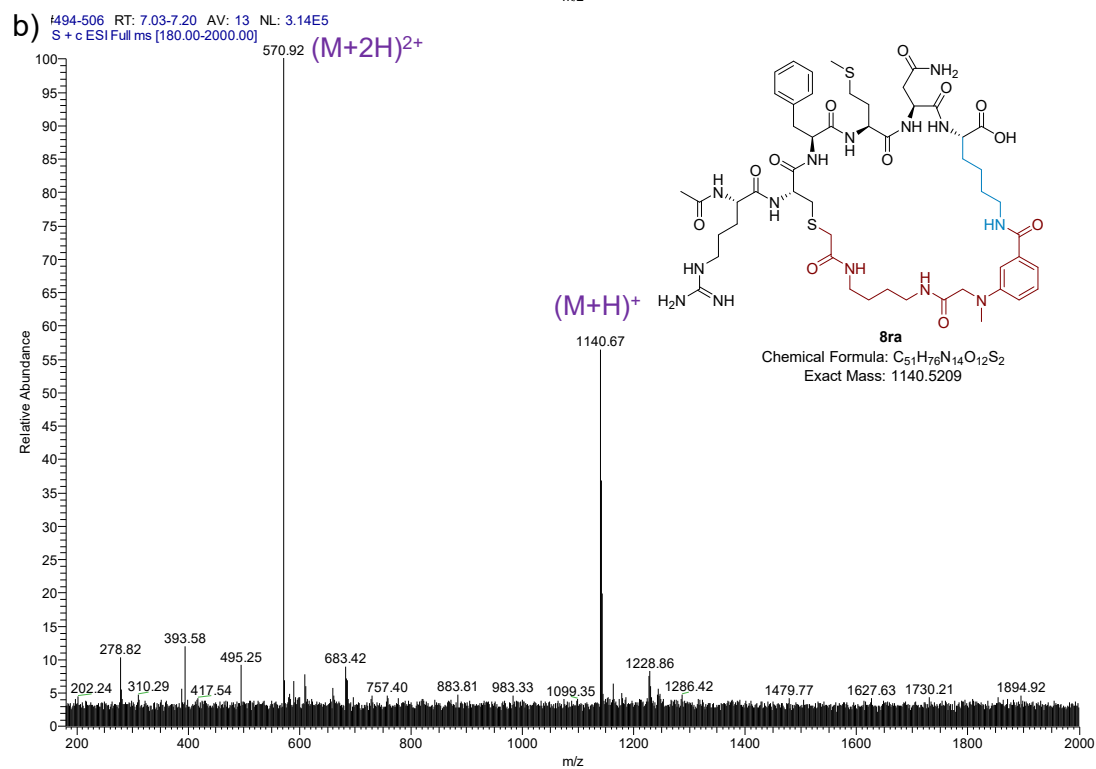

**Figure S78.** The mass spectra for identification of corresponding peptides: a) **8a**; b) **8ra**.





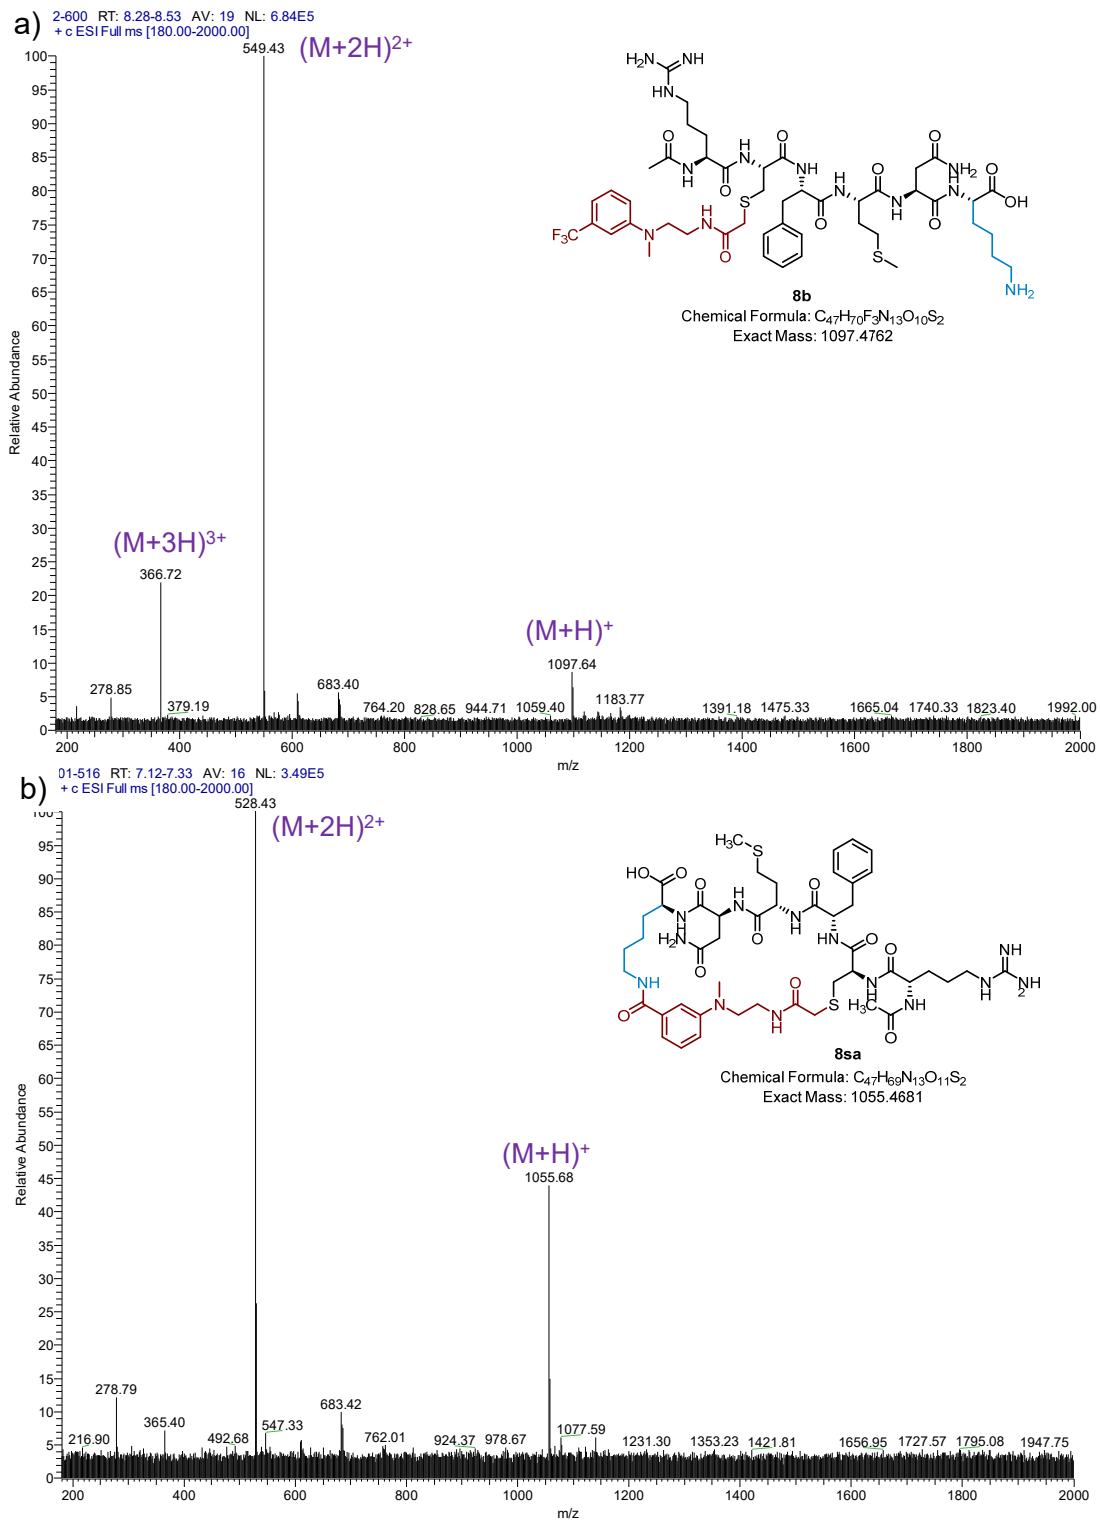

**Figure S80.** The mass spectra for identification of corresponding peptides: a) **8b**; b) **8sa**.



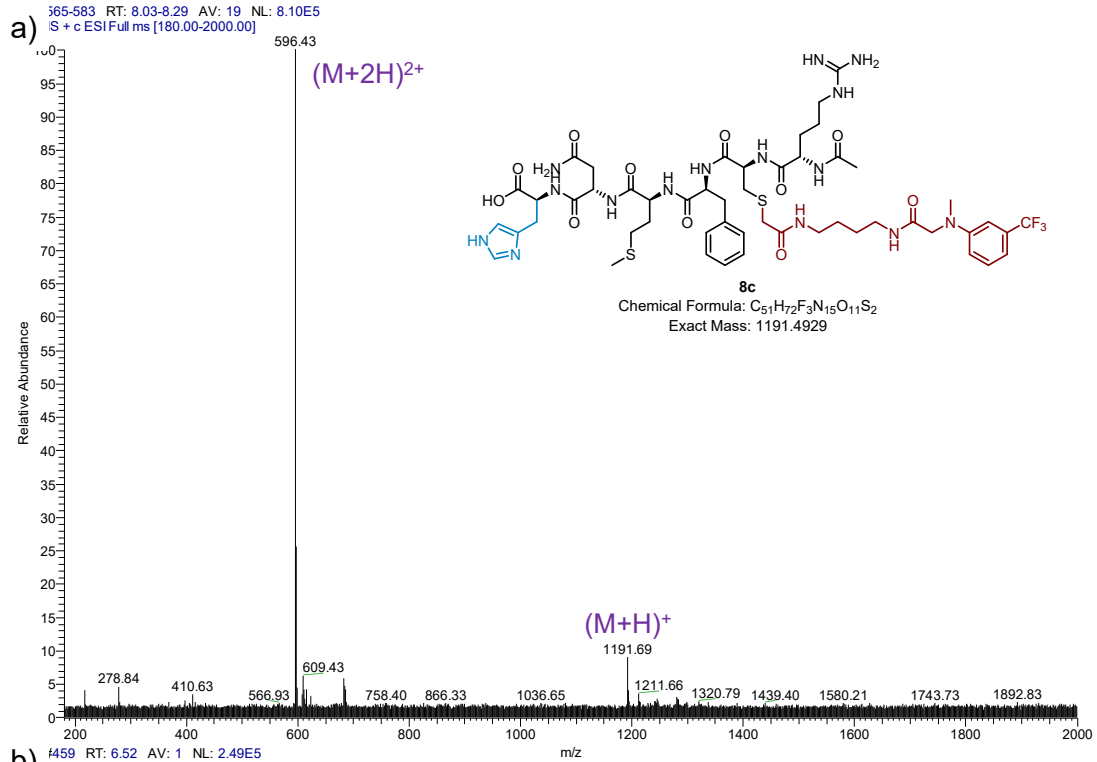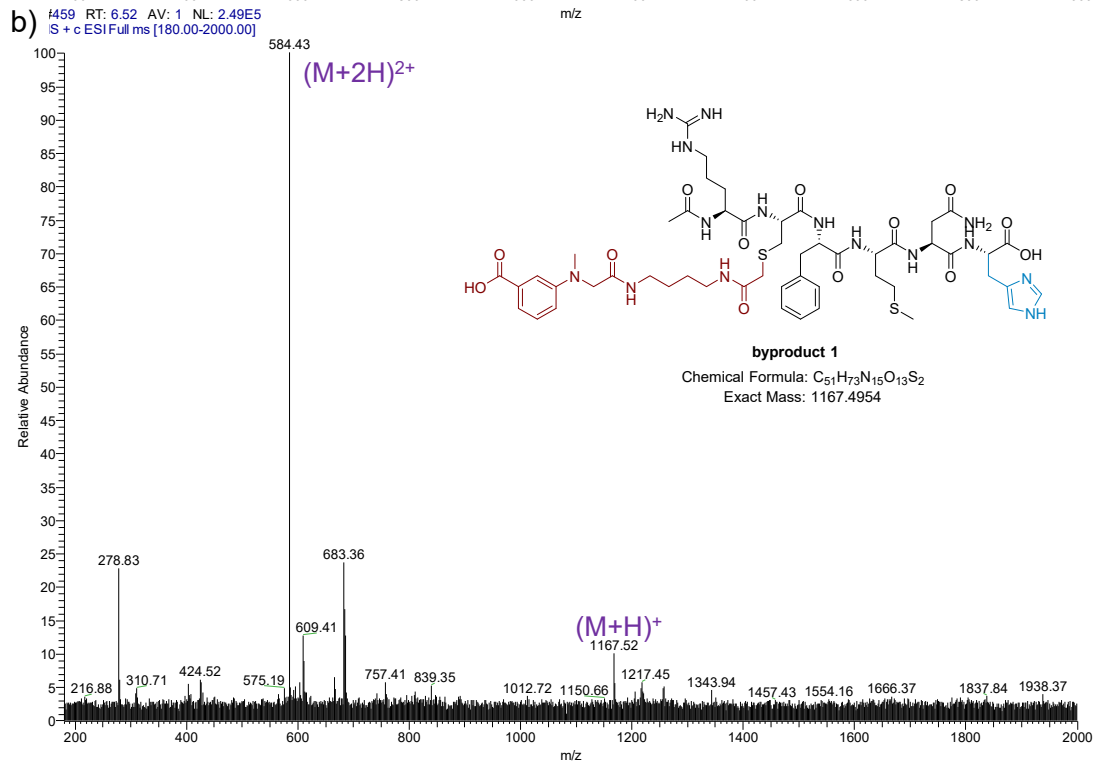

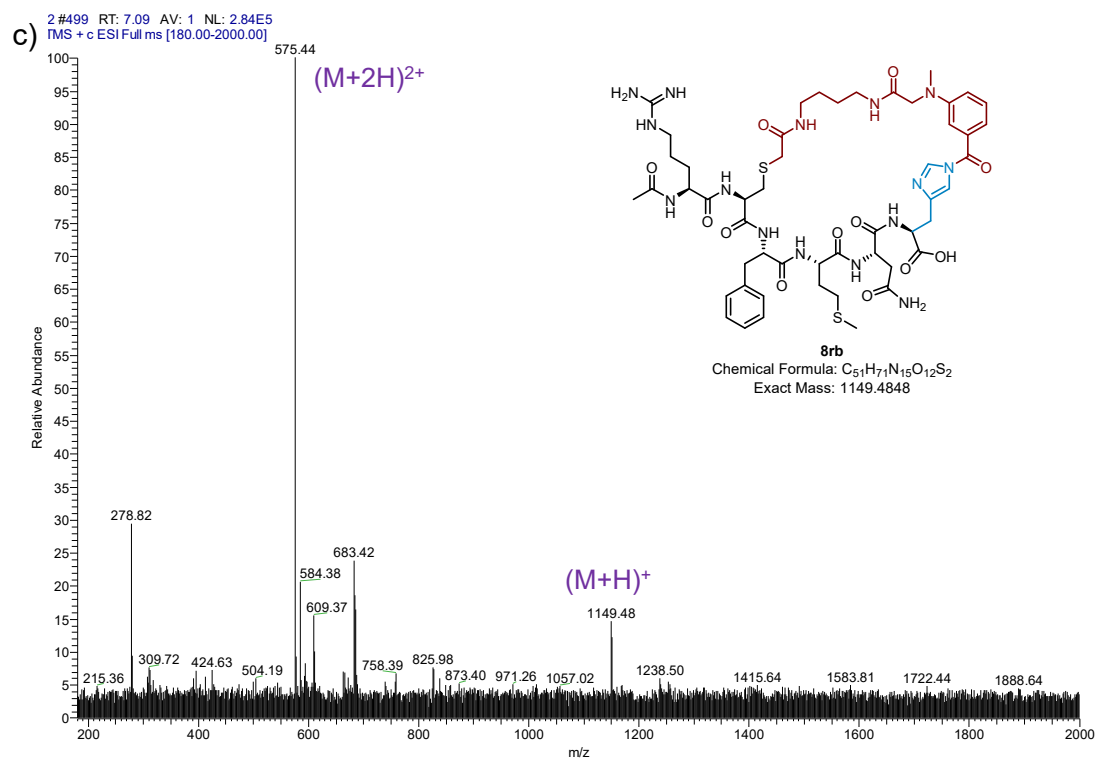

**Figure S82.** The mass spectra for identification of corresponding peptides: a) **8c**; b) the hydrolysis by-product-1; c) **8rb**.



a) 588-603 RT: 8.36-8.57 AV: 16 NL: 7.97E5  
#S + c ESI Full ms [180.00-2000.00]

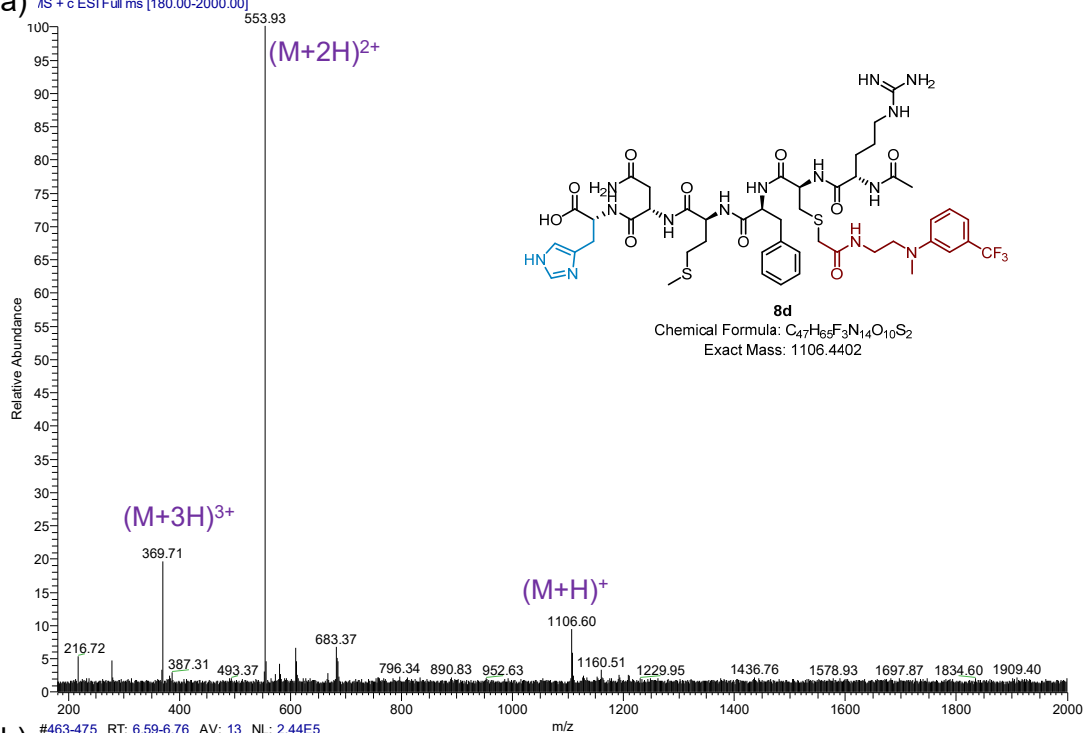

b) #463-475 RT: 6.59-6.76 AV: 13 NL: 2.44E5  
#S + c ESI Full ms [180.00-2000.00]

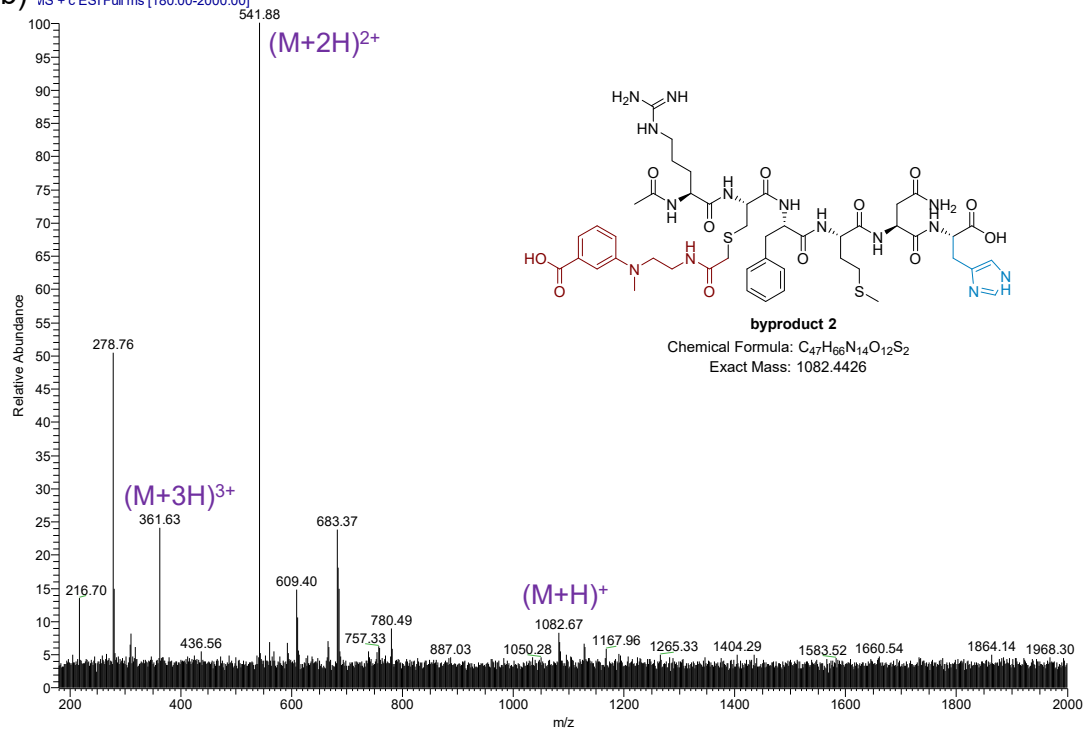

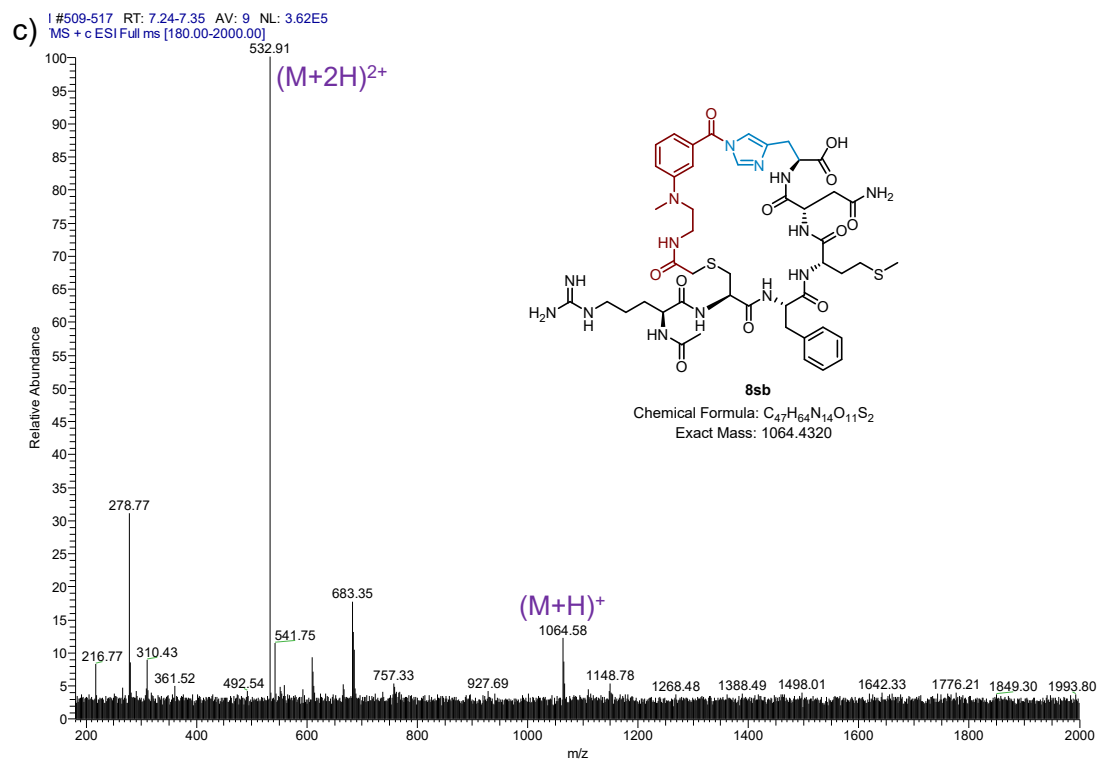

**Figure S84.** The mass spectra for identification of corresponding peptides: a) **8d**; b) the hydrolysis by-product-2; c) **8sb**.





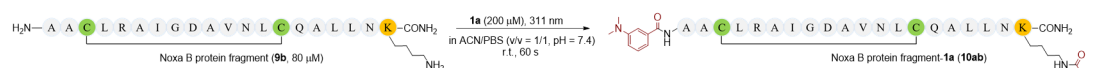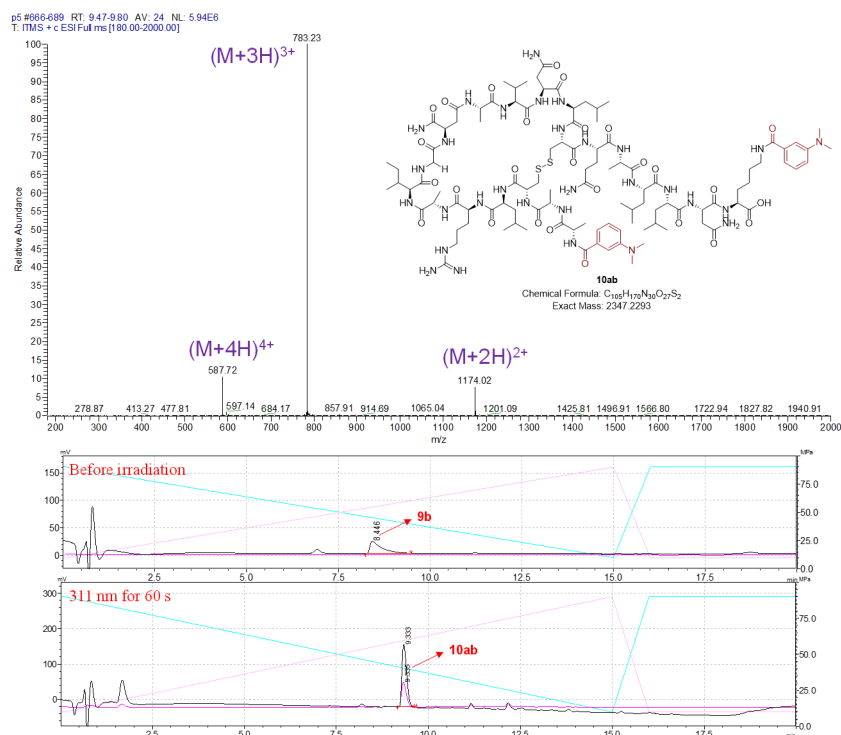

| Item               | Peak No. | Retention Time (min) | Integrated Area |
|--------------------|----------|----------------------|-----------------|
| Before irradiation | 1        | 8.446                | 474439          |
| 311 nm for 60 s    | 2        | 9.333                | 1553386         |
| HPLC yield         |          | 53%                  |                 |

**Figure S86.** **1a** (200  $\mu\text{M}$ ) and **9b** (80  $\mu\text{M}$ ) in 1.0 mL of ACN/PBS (v/v = 1/1, pH = 7.4) solution were irradiated with the 311 nm lamp (5.9  $\text{mW cm}^{-2}$ , single wavelength output after an optical filter) in a quartz test tube ( $\varphi = 0.8$  cm,  $l = 8.0$  cm optical path) for 60 s. The sample was collected for HPLC-MS analysis, and the yield was determined by external standards.

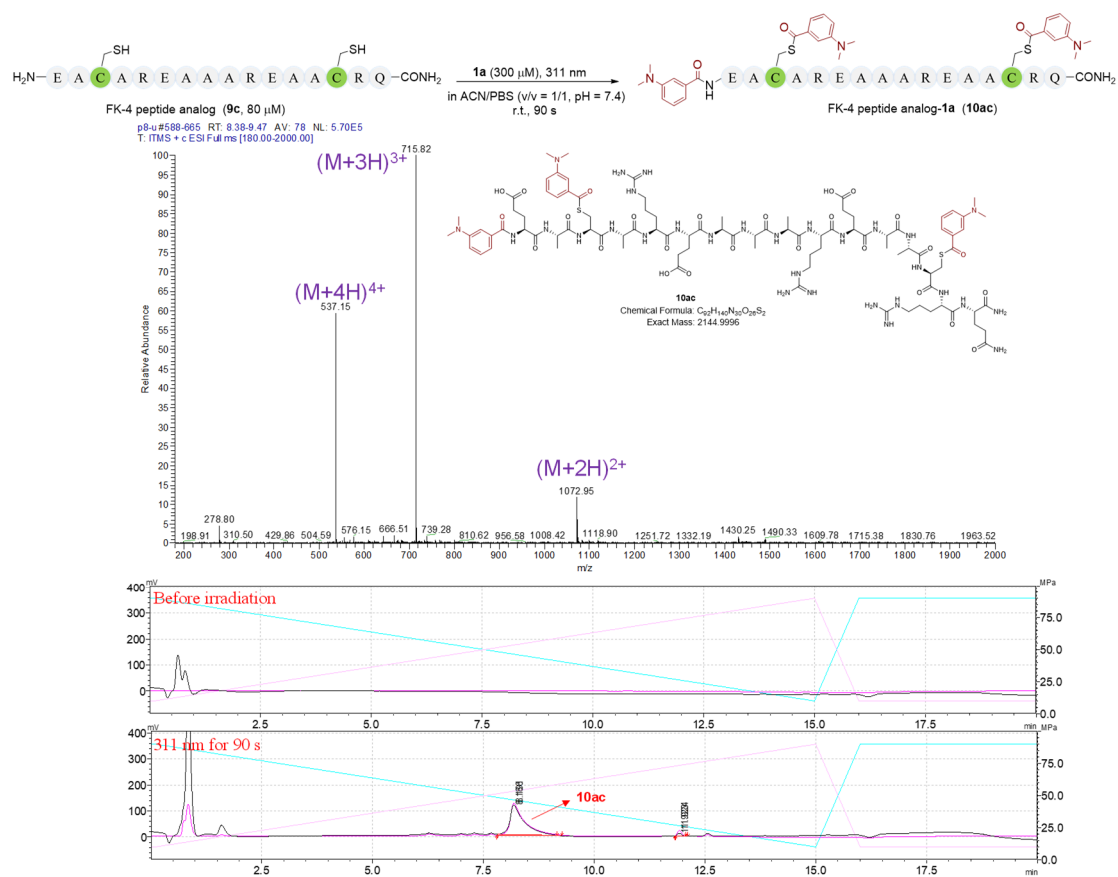

| Item               | Peak No. | Retention Time (min) | Integrated Area |
|--------------------|----------|----------------------|-----------------|
| Before irradiation | /        | /                    | /               |
| 311 nm for 90 s    | 1        | 8.272                | 2729799         |
|                    | 2        | 11.924               | 272667          |
| HPLC yield         | 74%      |                      |                 |

**Figure S87.** **1a** (300  $\mu\text{M}$ ) and **9c** (80  $\mu\text{M}$ ) in 1.0 mL of ACN/PBS (v/v = 1/1, pH = 7.4) solution were irradiated with the 311 nm lamp (5.9 mW  $\text{cm}^{-2}$ , single wavelength output after an optical filter) in a quartz test tube ( $\varphi = 0.8$  cm,  $l = 8.0$  cm optical path) for 90 s. The sample was collected for HPLC-MS analysis, and the yield was determined by external standards.

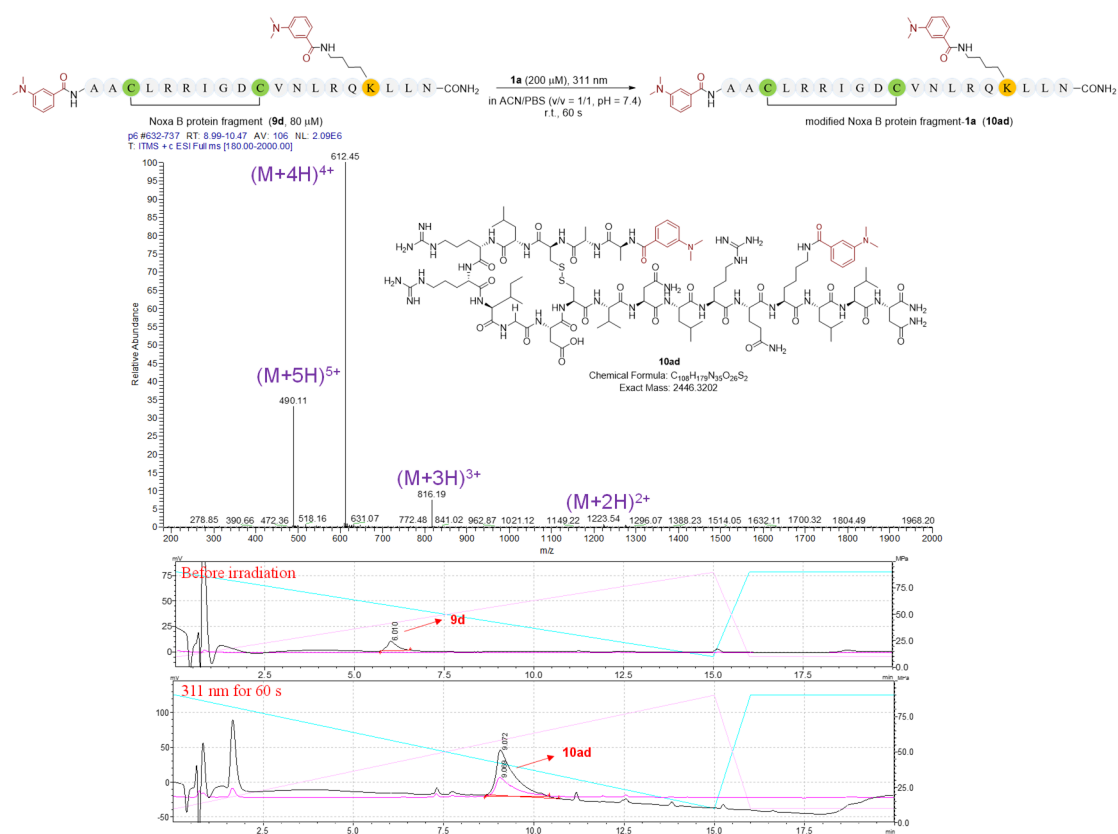

| Item               | Peak No. | Retention Time (min) | Integrated Area |
|--------------------|----------|----------------------|-----------------|
| Before irradiation | 1        | 6.010                | 178493          |
| 311 nm for 90 s    | 2        | 9.072                | 2156563         |
| HPLC yield         | 78%      |                      |                 |

**Figure S88.** **1a** (200 μM) and **9d** (80 μM) in 1.0 mL of ACN/PBS (v/v = 1/1, pH = 7.4) solution were irradiated with the 311 nm lamp (5.9 mW cm<sup>-2</sup>, single wavelength output after an optical filter) in a quartz test tube ( $\varphi = 0.8$  cm,  $l = 8.0$  cm optical path) for 60 s. The sample was collected for HPLC-MS analysis, and the yield was determined by external standards.

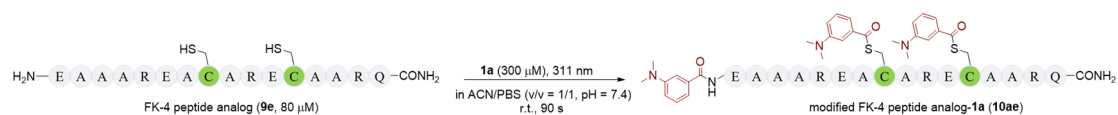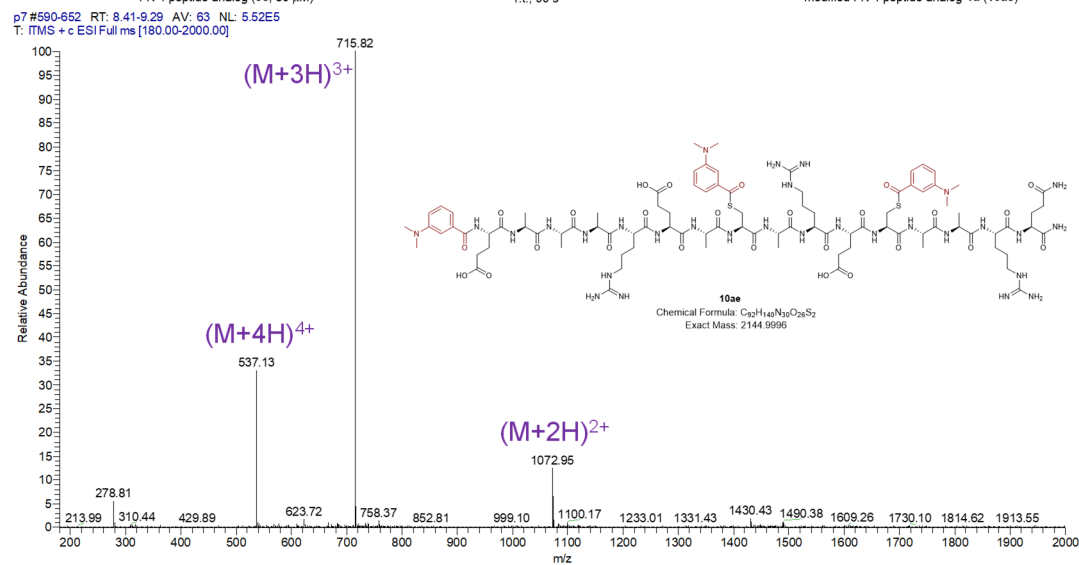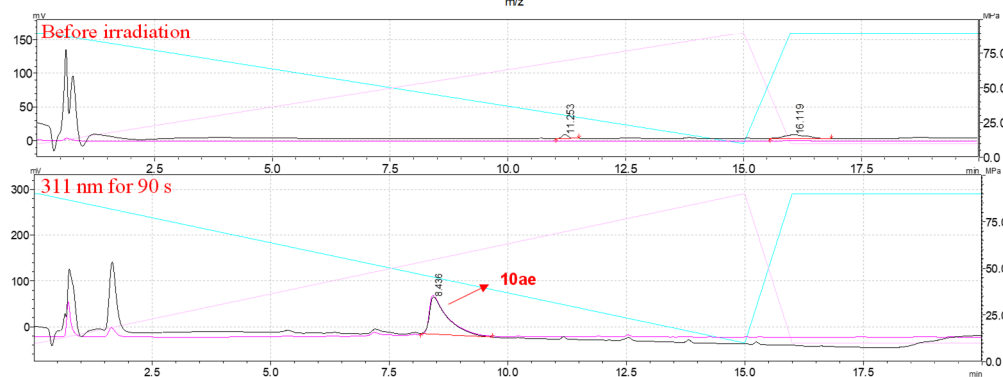

| Item               | Peak No. | Retention Time (min) | Integrated Area |
|--------------------|----------|----------------------|-----------------|
| Before irradiation | /        | /                    | /               |
| 311 nm for 90 s    | 1        | 8.436                | 2156563         |
| HPLC yield         | 60%      |                      |                 |

**Figure S89.** **1a** (300  $\mu\text{M}$ ) and **9e** (80  $\mu\text{M}$ ) in 1.0 mL of ACN/PBS (v/v = 1/1, pH = 7.4) solution were irradiated with the 311 nm lamp (5.9  $\text{mW cm}^{-2}$ , single wavelength output after an optical filter) in a quartz test tube ( $\varphi = 0.8$  cm,  $l = 8.0$  cm optical path) for 90 s. The sample was collected for HPLC-MS analysis, and the yield was determined by external standards.





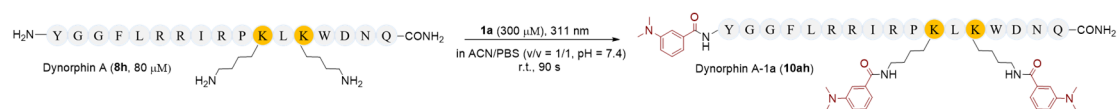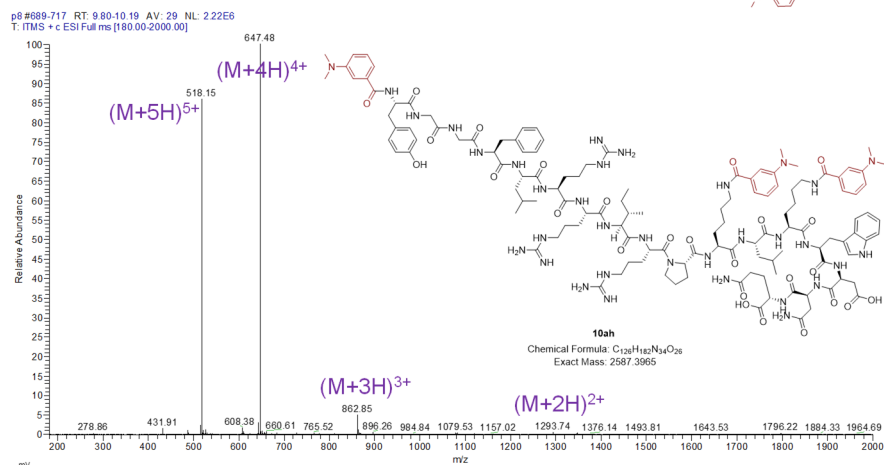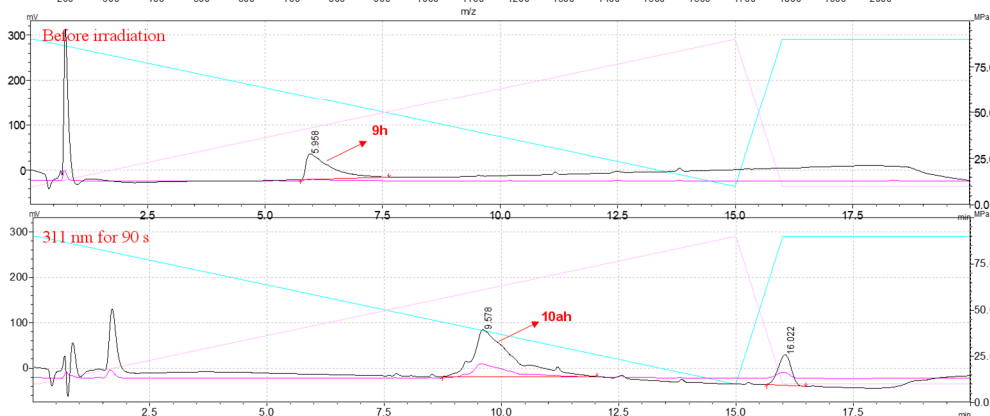

| Item               | Peak No. | Retention Time (min) | Integrated Area at 254 nm |
|--------------------|----------|----------------------|---------------------------|
| Before irradiation | /        | /                    | /                         |
| 311 nm for 90 s    | 1        | 9.578                | 1358301                   |
| HPLC yield         | 73%      |                      |                           |

**Figure S92.** **1a** (300  $\mu\text{M}$ ) and **9h** (80  $\mu\text{M}$ ) in 1.0 mL of ACN/PBS (v/v = 1/1, pH = 7.4) solution were irradiated with the 311 nm lamp (5.9 mW  $\text{cm}^{-2}$ , single wavelength output after an optical filter) in a quartz test tube ( $\varphi = 0.8$  cm,  $l = 8.0$  cm optical path) for 90 s. The sample was collected for HPLC-MS analysis, and the yield was determined by external standards.



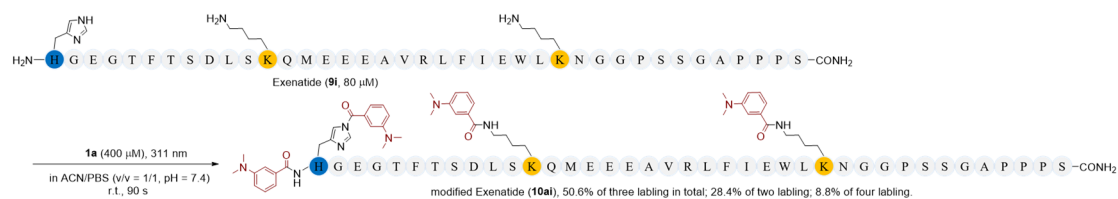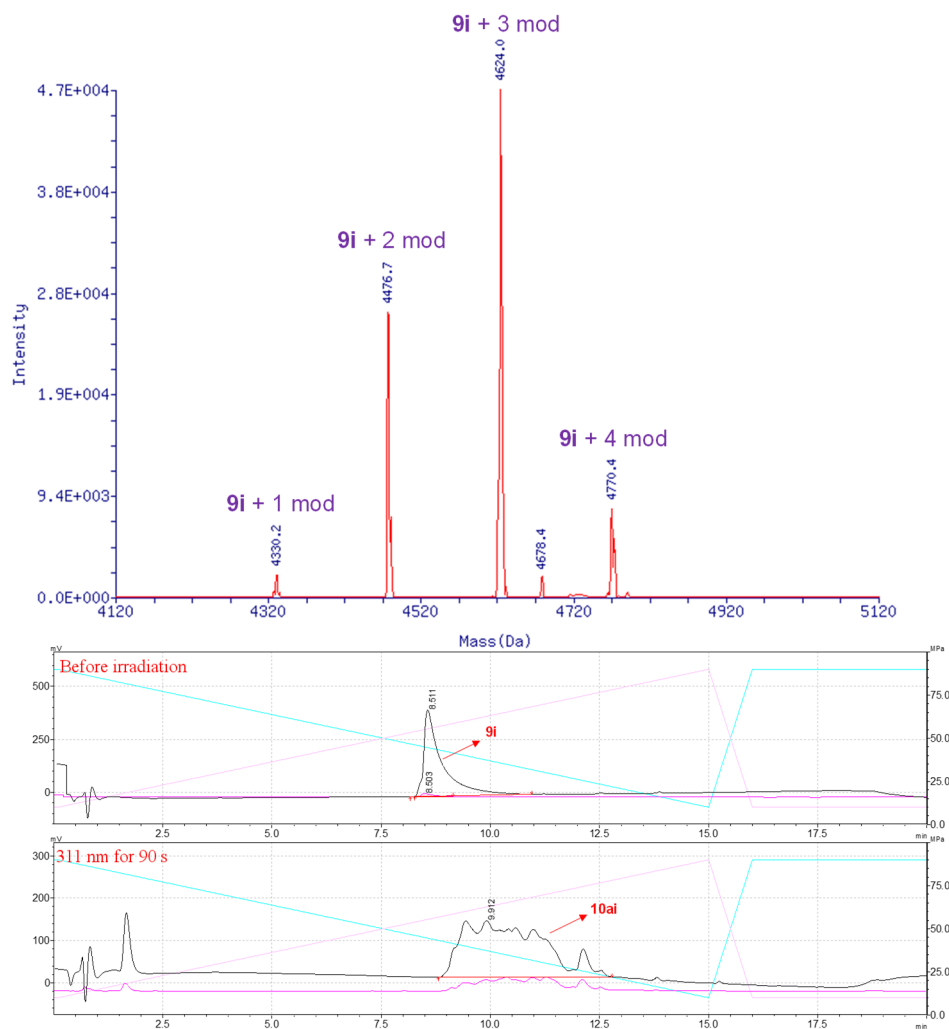

|                           | Item               | Mass data (Da) | Content in total |
|---------------------------|--------------------|----------------|------------------|
| Deconvoluted mass spectra | <b>9i + 1 mod.</b> | 4330.2         | 2%               |
|                           | <b>9i + 2 mod.</b> | 4476.7         | 28%              |
|                           | <b>9i + 3 mod.</b> | 4624.0         | 51%              |
|                           | <b>9i + 4 mod.</b> | 4770.4         | 9%               |

**Figure S93.** 1a (400 μM) and 9i (80 μM) in 1.0 mL of ACN/PBS (v/v = 1/1, pH = 7.4) solution were irradiated with the 311 nm lamp (5.9 mW cm<sup>-2</sup>, single wavelength output after an optical filter) in a quartz test tube ( $\varphi = 0.8$  cm,  $l = 8.0$  cm optical path) for 90 s. The sample was collected for HPLC-MS analysis, and the contents of each type of modified peptide were determined by deconvoluting the charge ladder. mod. = the photo-DAFex modification.

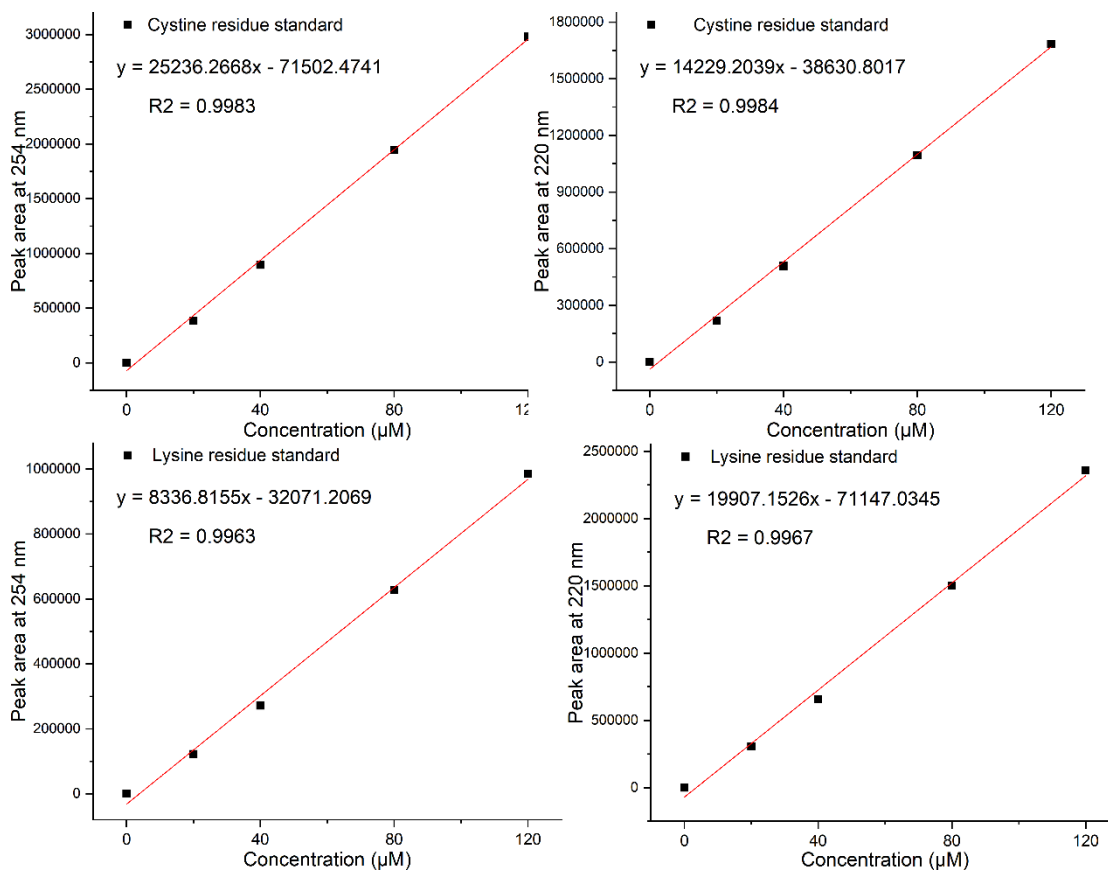

**Figure S94.** The calibration curves for determination of the photo-DAFEx reaction yields between **1a** and *N*-terminal Boc protected L-cystine/ L-lysine residues.

## 5. Methods

### 5.1 Expression and purification of sfGFP

*Escherichia coli* BL21 (DE3) strain harboring the sfGFP expression plasmid (pET-sfGFP-His6) were grown in 5.0 mL LB broth supplemented with ampicillin (100 µg/mL) overnight at 37 °C. An aliquot of this culture was then used to inoculate a fresh culture (1:100 dilution). When the culture grew to an OD of 0.5, protein production was induced with 1.0 mM IPTG. After further incubation for 8 h, the cells were pelleted in 50 mL conical centrifuge tubes by centrifugation at 4000 g for 30 min at 4 °C and the pellet was resuspended in a fresh 3.0 mL of lysis buffer (50 mM NaH<sub>2</sub>PO<sub>4</sub>, 300 mM NaCl, 10 mM imidazole, pH = 8.0). The resuspension was further treated with ultrasonication in an ice/water bath to lysis the cells. Following a high-speed centrifugation at 10000g at 4 °C, the supernatants were incubated with 200 µL Ni-NTA resin (Thermo HisPur) at 4 °C for 2 h with gentle shaking. The resin was centrifuged briefly and washed three times with washing buffer. Finally, the protein was eluted with elution buffer. The eluted fractions were collected, concentrated and subjected to buffer exchange to PBS buffer (pH = 7.4) using an Amicon Ultra-15 Centrifugal Filter (10k MWCO, Millipore). The protein purity was analysed by SDS-PAGE and LC/ESI-MS, and the original protein mass was obtained by deconvoluting the charge ladder.

### 5.2 LC-MS/MS analysis for protein photo-labeling

Protein stock solutions: lysozyme (200 µM) in PBS (pH = 7.4) buffer; sfGFP (200 µM) in PBS (pH = 7.4) buffer; BSA (200 µM) in PBS (pH = 7.4) buffer.

Reactant stock solution: **1a** (500 µM) in ACN/PBS (v/v = 1/1, pH = 7.4) solution.

20 µL of the protein stock solution, 20 µL of **1a** stock solution and 160 µL of PBS (pH = 7.4) buffer were mixed, and irradiated with the 311 nm lamp (5.9 mW cm<sup>-2</sup>, single wavelength output after an optical filter) in a quartz test tube ( $\varphi = 1$  cm,  $l = 8.0$  cm optical path) for 30 s. After 30 min incubation, each specimen was divided into two equal portions. One for LC/ESI-MS analysis and the conversion was determined by deconvoluting the charge ladder. The other portion was collected and subjected to SDS-PAGE resolving and in-gel staining with Coomassie Brilliant Blue (CBB). After gel-cutting and destaining with acetonitrile, the in-gel identified protein samples were treated with 10 mM DTT in 25 mM ABC solution at 56 °C for 1 h. The supernatants were removed, and the gel samples were alkylated with 55 mM IAA (in 25 mM ABC solution) in dark for 45 min at RT. After centrifugation, the supernatants were removed, and the gel samples were washed again with ACN. MS grade trypsin (1.0 µg, trypsin:protein = 1:50, w/w) was added to the gel samples with the target protein in 50 mM ABC buffer, and the digestion reaction was incubated for 16 h at 37 °C. A final concentration of 5% acetic acid was added to the suspension to terminate the reaction, and supernatant was discarded to collect the gel pellet, after centrifugation. The in-gel treated and identified proteins were then extracted with 50 µL 50%ACN/5%TFA in water, and the obtained peptides were desalted with a Millipore ZipTip® pipette tip and dried in a speedvac. The desalted peptides were resuspended in 15 µL of 0.1% (v/v) formic acid, and 5.0 µL of samples were subjected to LC-MS/MS analysis (with a Q Exactive plus mass spectrometer, Thermo). The mass spectroscopic raw data were searched and spliced by using the Mascot software.

### 5.3 In-gel fluorescence imaging for protein photo-labeling

Protein stock solutions: lysozyme (280 µM, 4.0 mg/mL) in PBS (pH = 7.4) buffer; sfGFP (150 µM, 4.0 mg/mL) in PBS (pH = 7.4) buffer; BSA (70 µM, 4.0 mg/mL) in PBS (pH = 7.4) buffer.

Reactant stock solutions: **1a** in ACN/PBS (v/v = 1/1, pH = 7.4) given in three concentrations as stock solution: 100  $\mu$ M, 500  $\mu$ M and 1000  $\mu$ M; **1l** in ACN/PBS (v/v = 1/1, pH = 7.4) as a 1000  $\mu$ M stock solution; **1m** in ACN/PBS (v/v = 1/1, pH = 7.4) as a 1000  $\mu$ M stock solution.

20  $\mu$ L of the protein stock solution, 20  $\mu$ L of reactant stock solution and 160  $\mu$ L of PBS (pH = 7.4) buffer were mixed, and irradiated with the 311 nm lamp (5.9 mW cm<sup>-2</sup>, single wavelength output after an optical filter) in a quartz test tube ( $\varphi$  = 1 cm,  $l$  = 8.0 cm optical path) for 60 s. After 30 min incubation, specimens were collected and analysed by SDS-PAGE. The labelled proteins were visualized by illumination with 365 nm UV on a gel imager (ChampChem<sup>TM</sup> 610Plus, SAGECREATION).

#### 5.4 Mass analysis for multi-labeling lysozyme

Protein stock solution: lysozyme (70  $\mu$ M, 1 mg/mL) in PBS (pH = 7.4) buffer.

Reactant stock solutions: **1a** in ACN/PBS (v/v = 1/1, pH = 7.4) given in three concentrations as stock solution: 100  $\mu$ M, 500  $\mu$ M and 1000  $\mu$ M;

20  $\mu$ L of the protein stock solution, 20  $\mu$ L of reactant stock solution and 160  $\mu$ L of PBS (pH = 7.4) buffer were mixed, and irradiated with the 311 nm lamp (5.9 mW cm<sup>-2</sup>, single wavelength output after an optical filter) in a quartz test tube ( $\varphi$  = 1 cm,  $l$  = 8.0 cm optical path) for 60 s. After 30 min incubation, specimens were collected and analysed by LC/ESI-MS. The protein mass was obtained by deconvoluting the charge ladder.

#### 5.5 Expression and purification of the recombinant hCA-II

*Escherichia coli* BL21(DE3) strain harbouring the hCA-II expression plasmid (pET-hCA-II-His6) were grown in 5.0 mL LB broth supplemented with ampicillin (100  $\mu$ g/mL) overnight at 37 °C. An aliquot of this culture was then used to inoculate a fresh culture (1:100 dilution). When the culture grew to an OD of 0.5, the culture mixture was supplemented with 50  $\mu$ M ZnSO<sub>4</sub>, and protein expression was induced with 1.0 mM IPTG. After further incubation for 8 h, the cells were pelletized in 50 mL conical centrifuge tubes by centrifugation at 4000 g for 30 min at 4 °C and the pellet was resuspended in a fresh 3.0 mL of lysis buffer (50 mM NaH<sub>2</sub>PO<sub>4</sub>, 300 mM NaCl, 10 mM imidazole, pH = 8.0). The resuspension was further treated with ultrasonication in an ice/water bath to lysis the cells. Following a high-speed centrifugation at 10000g at 4 °C, the supernatants were incubated with 200  $\mu$ L Ni-NTA resin (Thermo HisPur) at 4 °C for 2 h with gentle shaking. The resin was centrifuged briefly and washed three times with washing buffer. Finally, the protein was eluted with elution buffer. The eluted fractions were collected, concentrated and subjected to buffer exchange to PBS buffer (pH = 7.4) using an Amicon Ultra-15 Centrifugal Filter (10k MWCO, Millipore). The protein purity was analysed by SDS-PAGE and LC/ESI-MS, and the original protein mass was obtained by deconvoluting the charge ladder.

**Table S7.** The synthesized photo-affinity labeling probes

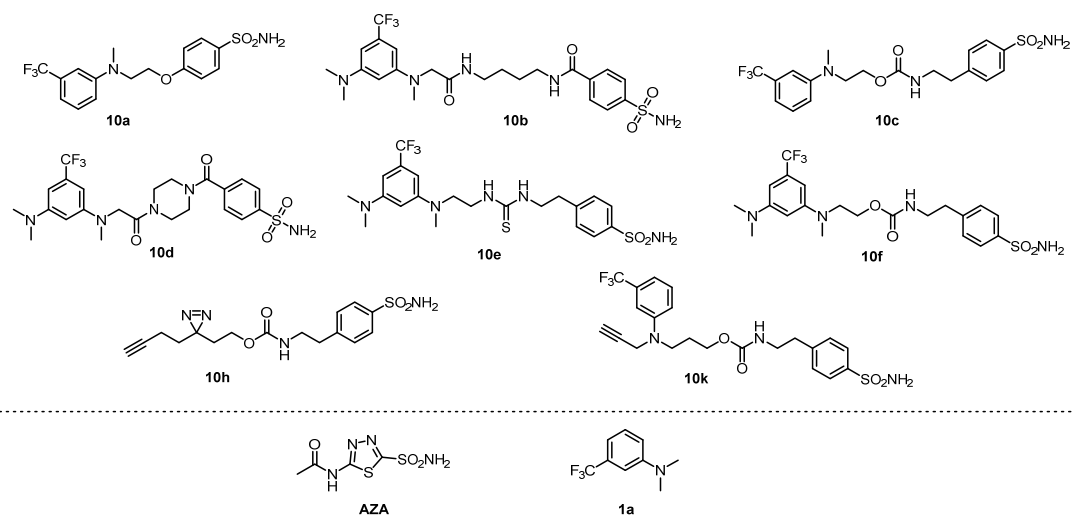

### 5.6 Inhibitor screening conditions and procedure

Protein mixtures: lysozyme (280  $\mu$ M, 4 mg/mL), hCA-II (130  $\mu$ M, 4 mg/mL) and BSA (70  $\mu$ M, 4 mg/mL) were mixed in PBS (pH = 7.4) buffer.

Inhibitor stock solutions: **10a-10f** (200  $\mu$ M for each inhibitor) in DMSO.

Control stock solutions: **1a** (200  $\mu$ M) in DMSO; AZA (10 mM) in DMSO.

20  $\mu$ L of the protein mixture, 20  $\mu$ L of the inhibitor stock solution (**10a-10f**) and 160  $\mu$ L of PBS buffer (pH = 7.4) were mixed as test groups. 20  $\mu$ L of the protein mixture, 20  $\mu$ L of **1a** stock solution and 160  $\mu$ L of PBS buffer (pH = 7.4) buffer were mixed as the control group; 20  $\mu$ L of the protein mixture, 20  $\mu$ L of **10f** stock solution, 20  $\mu$ L of AZA stock solution and 140  $\mu$ L of PBS buffer (pH = 7.4) buffer were mixed as the control group. Following, all groups were incubated under darkness for 30 min at room temperature, and treated with a 311 nm lamp (5.9 mW cm<sup>-2</sup>, single wavelength output after an optical filter) in a quartz test tube ( $\varphi$  = 1 cm,  $l$  = 8.0 cm optical path) for 30 s at room temperature. After 30 min incubation, specimens were collected and analysed by SDS-PAGE. The labelled proteins were visualized by illumination with 365 nm UV on a gel imager (ChampChemi™ 610Plus, SAGECREATION).

### 5.7 In-gel fluorescence analysis for screening the probe concentration

Protein stock solution: hCA-II (130  $\mu$ M, 4.0 mg/mL) in PBS buffer (pH = 7.4);

Inhibitor stock solutions: **10a/10c/10h/10k** in DMSO with five concentrations as stock solution: 100  $\mu$ M, 200  $\mu$ M, 400  $\mu$ M, 800  $\mu$ M, 1200  $\mu$ M;

20  $\mu$ L of hCA-II stock solution, 20  $\mu$ L of the inhibitor stock solution and 160  $\mu$ L of PBS buffer (pH = 7.4) were mixed, incubated under darkness for 30 min at room temperature, and then treated with a 311 nm lamp (5.9 mW cm<sup>-2</sup>, single wavelength output after an optical filter) in a quartz test tube ( $\varphi$  = 1 cm,  $l$  = 8.0 cm optical path) for 60 s at room temperature. After 30 min incubation, specimens were collected and analyzed by SDS-PAGE. The **10a/10c** labelled hCA-II were directly visualized on a gel imager (ChampChemi™ 610Plus, SAGECREATION), while **10h/10k** labelled hCA-II were treated with azide-Alexa-647 according to the general CuAAC procedure and resolved by SDS-PAGE before visualized on a gel imager (ChampChemi™ 610Plus, SAGECREATION).

### 5.8 In-gel fluorescence analysis for the irradiation time-course tracking

Protein stock solution: hCA-II (130  $\mu$ M, 4.0 mg/mL) in PBS buffer (pH = 7.4);

Inhibitor stock solution: **10a/10c** in DMSO with 1200  $\mu$ M of concentrations;

20  $\mu$ L of hCA-II stock solution, 20  $\mu$ L of the inhibitor stock solution and 160  $\mu$ L of PBS buffer (pH = 7.4) were mixed, incubated under darkness for 30 min at room temperature, and then treated with a 311 nm lamp (5.9 mW cm<sup>-2</sup>, single wavelength output after an optical filter) in a quartz test tube ( $\varphi$  = 1 cm,  $l$  = 8.0 cm optical path) for different irradiation time at room temperature. After 30 min incubation, specimens were collected and analysed by SDS-PAGE. The labelled proteins were visualized by illumination with 365 nm UV on a gel imager (ChampChemi™ 610Plus, SAGECREATION).

### 5.9 Enzymatic activity assay of the purified hCA-II

The hCA-II activity can be determined by the catalytic hydrolysis of *p*-nitrophenyl acetate into *p*-nitrophenol, which shows strong absorbance at 405 nm. hCA-II (1  $\mu$ M) and *p*-nitrophenyl acetate (2.5 mM) were incubated in the presence of the inhibitor at various concentrations in a 96-well plate in PBS buffer of pH = 7.4 (final volume of 100  $\mu$ L). After incubation at 24 °C for 30 min, the absorbance at 405 nm was measured using a multimode microplate reader (iMark, BIO-RAD). The percentage inhibition was defined relative to the maximal activity which was measured without the inhibitor. The IC<sub>50</sub> value of **10a**, **10c**, **10h**, **10k**, and **AZA** were obtained from a graph of percent inhibition versus inhibitor concentration and calculated using the Prism GraphPad software.

### 5.10 PAL Labeling of the recombinant hCA-II in *E. Coli* bacterial lysates

*Escherichia coli* BL21 (DE3) strain harbouring the hCA-II expression plasmid (pET-hCA-II-His6) were grown in 5.0 mL LB broth supplemented with ampicillin (100  $\mu$ g/mL) overnight at 37 °C. An aliquot of this culture was then used to inoculate a fresh culture (1 : 100 dilution, 50 mL in total). After further incubation for 8 h, the cells were pelletized in 50 mL conical centrifuge tubes by centrifugation at 4000 g for 30 min at 4 °C and resuspended in a fresh 2 mL of PBS buffer (pH = 7.4). The cells in the buffer were further treated with ultrasonication in an ice/water bath to lysis the cells. Following a high-speed centrifugation at 10000g at 4 °C, the supernatants were collected as cell lysates for further tests.

20  $\mu$ L of cell lysate and 20  $\mu$ L of the inhibitor solution (**10a-10f**, 200  $\mu$ M) and 160  $\mu$ L PBS (pH = 7.4) buffer were mixed as the test groups. 20  $\mu$ L of cell lysate and 20  $\mu$ L of **1a** stock solution and 160  $\mu$ L of PBS buffer (pH = 7.4) buffer were mixed as the control group; 20  $\mu$ L of cell lysate and 20  $\mu$ L of **10f** stock solution, 20  $\mu$ L of AZA stock solution, and 140  $\mu$ L of PBS buffer (pH = 7.4) buffer were mixed as the control group with the AZA competitor. All groups were incubated under darkness for 30 min at room temperature, and irradiated with the 311 nm lamp (10.8 mW cm<sup>-2</sup>, single wavelength output after an optical filter) in a quartz test tube ( $\varphi$  = 1 cm,  $l$  = 8.0 cm optical path) for 30 s at room temperature. After 30 min incubation, specimens were collected and analysed by SDS-PAGE. The labelled proteins were visualized by illumination with 365 nm UV on a gel imager (ChampChemi™ 610Plus, SAGECREATION). The resolved proteins were then transferred to PVDF membranes, and a western blot was performed with anti-CA-II rabbit pAb (ZEN-BIO, #820344, 1:2000) and goat anti-rabbit IgG (ZEN-BIO, #550037, 1:2000).

### 5.11 Tandem mass analysis of the hCA-II after PAL labeling

20  $\mu$ L of the hCA-II solution (50  $\mu$ M, 4 mg/mL) and 20  $\mu$ L of **10a/10c** solution (200  $\mu$ M) were mixed

in a total volume of 200  $\mu\text{L}$  solution in PBS buffer, which was incubated under darkness for 30 min at room temperature. The samples were then irradiated with the 311 nm lamp (5.9  $\text{mW cm}^{-2}$ , single wavelength output after an optical filter) in a quartz test tube ( $\phi = 1 \text{ cm}$ ,  $l = 8.0 \text{ cm}$  optical path) for 30 s at room temperature. After another 30 min incubation, the samples were collected and subjected with LC/ESI-MS, and the protein mass was obtained by deconvoluting the charge ladder.

In the LC-MS/MS analysis, the collected protein samples were firstly separated by SDS-PAGE and stained with Coomassie Brilliant Blue. After gel-cutting and destaining with acetonitrile, the in-gel identified protein samples were treated with 10 mM DTT in 25 mM ABC solution at 56  $^{\circ}\text{C}$  for 1 h. The supernatants were removed, and the gel samples were alkylated with 55 mM IAA (in 25 mM ABC solution) in dark for 45 min at RT. After centrifugation, the supernatants were removed, and the gel samples were washed again with ACN. MS grade trypsin (1.0  $\mu\text{g}$ , trypsin:protein = 1:50, w/w) was added to the gel samples with the target protein in 50 mM ABC buffer, and the digestion reaction was incubated for 16 h at 37  $^{\circ}\text{C}$ . A final concentration of 5% acetic acid was added to the suspension to terminate the reaction, and supernatant was discarded to collect the gel pellet, after centrifugation. The in-gel treated and identified proteins were then extracted with 50  $\mu\text{L}$  50%ACN/5%TFA in water, and the obtained peptides were desalted with a Millipore ZipTip<sup>®</sup> pipette tip and dried in a speedvac. The desalted peptides were resuspended in 15  $\mu\text{L}$  of 0.1% (v/v) formic acid, and 5.0  $\mu\text{L}$  of samples were subjected to LC-MS/MS analysis (with a Q Exactive plus mass spectrometer, Thermo). The mass spectroscopic raw data were searched and spliced by using the Mascot software.

#### 5.12 PAL Labeling of the overexpressed hCA-II in living bacterial cells

*Escherichia coli* BL21 (DE3) strain with the hCA-II expression plasmid (pET- hCA-II -His6) were grown in 5.0 mL LB broth supplemented with ampicillin (100  $\mu\text{g/mL}$ ) overnight at 37  $^{\circ}\text{C}$ . An aliquot of this culture was then used to inoculate a fresh culture (1 : 100 dilution). When the culture grew to an OD of 0.5, the culture mixture was supplemented with 50  $\mu\text{M}$   $\text{ZnSO}_4$ , and protein production was induced with 1.0 mM IPTG and 0.2% arabinose. After further incubation for 4 h, the cells were incubated with **10a** (20  $\mu\text{M}$ ) in 1.0 mL culture medium for 1.5 h, with or without AZA (400  $\mu\text{M}$ ). The supernatant was discarded after centrifugation at 4000 g, and the cells were washed gently twice with PBS buffer to remove the excessive probe. The cell pellets were re-suspended with 1.0 mL PBS, then 10  $\mu\text{L}$  of cell/PBS suspension was pipetted onto a sterilized glass slide and spread evenly. The specimens were irradiated with the 311 nm lamp (5.9  $\text{mW cm}^{-2}$ , single wavelength output after an optical filter) for 60 s. Then the specimen was subjected to fluorescence microscopic imaging and the imaging data were collected on an Olympus IX83 live cell fluorescence (100 $\times$  oil-immersion objective,  $\lambda_{\text{ex.}} = 365 \text{ nm}$ ,  $\lambda_{\text{em.}} = 420\text{-}460 \text{ nm}$ ).

#### 5.13 Photo-affinity labeling in bacterial lysates with side-by-side comparisons between the photo-DAFex and the diazine photolysis

100  $\mu\text{L}$  of *Escherichia coli* BL21 (DE3) lysate (containing about 16  $\mu\text{g}$  of recombinant hCA-II) and 20  $\mu\text{L}$  of the inhibitor solution (**10h/10k**, 20  $\mu\text{M}$  in final) with/without AZA competitor (200  $\mu\text{M}$  in final concentration) in final 200  $\mu\text{L}$  of PBS (pH = 7.4) buffer were incubated under darkness for 30 min at room temperature. Then the **10h** containing samples were treated 365 nm lamp (68  $\text{mW cm}^{-2}$ ) for 180 s; the **10k** containing samples were treated 311 nm lamp (10.8  $\text{mW cm}^{-2}$ ) for 30 s at room temperature. After 30 min incubation, specimens were treated with azide-647 according to the general CuAAC procedure before visualized on a gel imager (ChampChemi<sup>TM</sup> 610Plus, SAGECREATION).

#### **5.14 Photo-affinity labeling of the endogenous CA-II in living mammalian cells**

HEK 293T cells were seeded in 6-well plates at  $10^5$  cells/mL density for 36 h prior to the PAL experimental procedure. Cells were then treated with 1.0 mL of the DMEM containing **10h/10k** ( $5.0 \mu\text{M}$ ), with or without AZA ( $25 \mu\text{M}$ ). After 2 h of incubation at  $37^\circ\text{C}/5\% \text{CO}_2$ , the culture medium was aspirated, and cells were washed gently once with PBS to remove the excessive probe, followed by the irradiation (**10h** treated cell samples were exposed to 365 nm lamp ( $68 \text{ mW cm}^{-2}$ ) for 4 min; **10k** treated cell samples were exposed to 311 nm lamp ( $10.8 \text{ mW cm}^{-2}$ ) for 1 min in PBS. The cells were lysed in RIPA lysis buffer, and the endogenous proteins were collected and treated with azide-Alexa-647 conjugate according to the general CuAAC procedure, resolved by SDS-PAGE before visualized on a gel imager (ChampChemi™ 610Plus, SAGECREATION). After imaging, the resolved proteins from cell lysate were then transferred to PVDF membranes via electro-transferring, and then a western blot staining was performed with a primary anti-CA-II rabbit pAb (ZEN-BIO, #820344, 1:2000 dilution) and a secondary HRP-labelled Goat Anti-Rabbit IgG (Beyotime, A0208, 1:1000 dilution) for ECL detection.



## 6. Synthetic procedures and compound characterization

### 6.1 The synthetic method for 1a, 1t, and 1e.

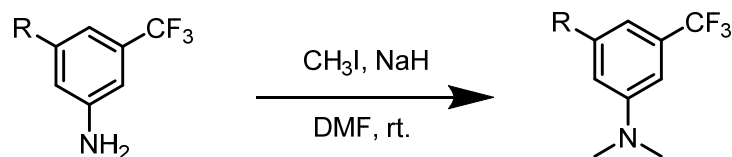

R = H, Br, NH<sub>2</sub>

3-aminobenzotrifluoride (1.0 equiv.) or 3-amino-5-bromobenzotrifluoride (1.0 equiv.) 3,5-diaminobenzotrifluoride (1.0 equiv.) and sodium hydride (3.0 equiv.) in anhydrous DMF solvent were added iodomethane (3.0 equiv.) under argon, and the mixture was stirred for 12 h at room temperature. The reaction was quenched with water and extracted with ethyl acetate three times. The organic layer was washed with H<sub>2</sub>O and brine, dried over MgSO<sub>4</sub>, and concentrated in vacuo. The residue was purified by silica chromatography (PE : EtOAc = 10 : 1) to afford corresponding products.

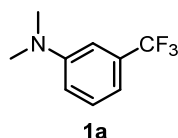

***N,N*-dimethyl-3-(trifluoromethyl)aniline (1a)**: as a yellow oil (82% yield)

<sup>1</sup>H NMR (400 MHz, CDCl<sub>3</sub>) δ 7.31 (ddt, *J* = 8.4, 7.6, 0.6 Hz, 1H), 6.94 (ddd, *J* = 7.4, 1.6, 0.8 Hz, 1H), 6.89 (d, *J* = 1.8 Hz, 1H), 6.85 (dd, *J* = 8.4, 2.6 Hz, 1H), 2.99 (s, 6H).

<sup>13</sup>C NMR (101 MHz, CDCl<sub>3</sub>) δ 150.46, 131.36 (q, *J* = 31.3 Hz), 129.43, 124.57 (q, *J* = 272.1 Hz), 115.18, 112.67 (q, *J* = 4.2 Hz), 108.47 (q, *J* = 3.8 Hz), 40.37.

<sup>19</sup>F NMR (376 MHz, CDCl<sub>3</sub>) δ -63.79.

HRMS (ESI) calculated C<sub>9</sub>H<sub>11</sub>F<sub>3</sub>N<sup>+</sup> [M+H]<sup>+</sup> *m/z* 190.0844, found 190.0836.

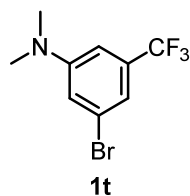

**3-bromo-*N,N*-dimethyl-5-(trifluoromethyl)aniline (1t)**: as a yellow oil (57% yield).

<sup>1</sup>H NMR (400 MHz, CDCl<sub>3</sub>) δ 7.04 (td, *J* = 1.6, 0.8 Hz, 1H), 6.93 (t, *J* = 2.2 Hz, 1H), 6.78 (ddd, *J* = 2.4, 1.6, 0.8 Hz, 1H), 2.99 (s, 6H).

<sup>13</sup>C NMR (101 MHz, CDCl<sub>3</sub>) δ 151.26, 132.64 (q, *J* = 32.0 Hz), 123.62 (q, *J* = 273.0 Hz), 123.44, 117.51, 115.28 (q, *J* = 3.9 Hz), 107.17 (q, *J* = 3.9 Hz), 40.21.

<sup>19</sup>F NMR (376 MHz, CDCl<sub>3</sub>) δ -62.97.

HRMS (ESI) calculated C<sub>9</sub>H<sub>10</sub>BrF<sub>3</sub>N<sup>+</sup> [M+H]<sup>+</sup> *m/z* 267.9943, found 267.9941.

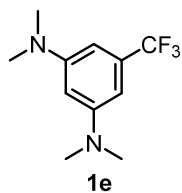

***N*<sup>1</sup>,*N*<sup>1</sup>,*N*<sup>3</sup>,*N*<sup>3</sup>-tetramethyl-5-(trifluoromethyl)benzene-1,3-diamine (1e)**: as a white solid (73% yield).

**<sup>1</sup>H NMR (400 MHz, CDCl<sub>3</sub>)** δ 6.37 (d, *J* = 2.2 Hz, 2H), 6.13 (t, *J* = 2.2 Hz, 1H), 2.99 (s, 12H).

**<sup>13</sup>C NMR (101 MHz, CDCl<sub>3</sub>)** δ 151.62, 131.85 (q, *J* = 30.8 Hz), 124.89 (q, *J* = 272.6 Hz), 99.02 (d, *J* = 1.4 Hz), 98.21 (q, *J* = 4.0 Hz), 40.60.

**<sup>19</sup>F NMR (376 MHz, CDCl<sub>3</sub>)** δ -62.81.

**HRMS (ESI)** calculated C<sub>11</sub>H<sub>16</sub>F<sub>3</sub>N<sub>2</sub><sup>+</sup> [M+H]<sup>+</sup> *m/z* 233.1260, found 233.1264.

## 6.2 Isolation of the acyl fluoride

30 mg of *N,N*-dimethyl-3-(trifluoromethyl)aniline (**1a**) was added into a total volume of 100 mL in ACN/H<sub>2</sub>O (v/v = 1/1) solution, followed by irradiation with the 311 nm lamp (21.2 mW cm<sup>-2</sup>) in a quartz test flask for 30 min. After removing ACN in vacuo, the aqueous layer was extracted with DCM three times, dried over MgSO<sub>4</sub> and concentrated in vacuo, and given 3-(dimethylamino)benzoyl fluoride (**5a**).

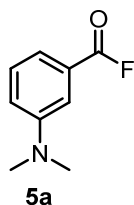

**3-(dimethylamino)benzoyl fluoride (5a)**: as a yellow oil (77% yield).

**<sup>1</sup>H NMR (400 MHz, DMSO-*d*<sub>6</sub>)** δ 7.42 (ddd, *J* = 8.5, 7.5, 1.2 Hz, 1H), 7.33 – 7.26 (m, 1H), 7.22 (dd, *J* = 2.8, 1.7 Hz, 1H), 7.16 (ddd, *J* = 8.3, 2.8, 0.9 Hz, 1H), 2.97 (s, 6H).

**<sup>13</sup>C NMR (101 MHz, DMSO-*d*<sub>6</sub>)** δ 158.12 (d, *J* = 344.1 Hz), 151.04, 130.45, 124.93 (d, *J* = 58.9 Hz), 119.72, 118.73 (d, *J* = 3.4 Hz), 113.77 (d, *J* = 4.4 Hz), 40.33.

**<sup>19</sup>F NMR (376 MHz, DMSO-*d*<sub>6</sub>)** δ 17.66.

**HRMS (ESI)** calculated C<sub>9</sub>H<sub>11</sub>FNO<sup>+</sup> [M+H]<sup>+</sup> *m/z* 168.0819, found 168.0818.

## 6.3 The synthetic method for 1b-1c and 1f-1g.

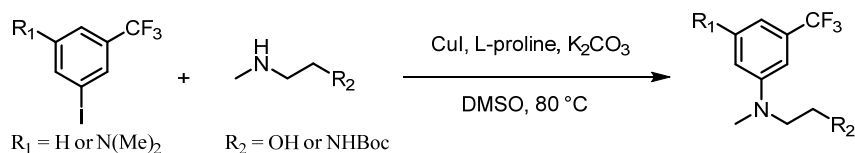

A mixture of aryl halide (1 equiv.), alkylamine (1.5 equiv.), K<sub>2</sub>CO<sub>3</sub> (2 equiv.), CuI (0.1 equiv.) and L-proline (0.2 equiv.) in DMSO was stirred overnight at 80 °C under argon. The reaction was quenched with water and extracted with ethyl acetate three times. The organic layer was washed with H<sub>2</sub>O and brine, dried over MgSO<sub>4</sub>, and concentrated in vacuo. The residue was purified by silica chromatography (PE : EtOAc = 2 : 1) to afford corresponding products.

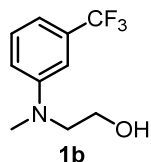

**2-(methyl(3-(trifluoromethyl)phenyl)amino)ethan-1-ol (1b):** as a yellow oil (78% yield).

<sup>1</sup>H NMR (400 MHz, CDCl<sub>3</sub>) δ 7.31 (td, *J* = 8.2, 0.8 Hz, 1H), 6.98 – 6.90 (m, 3H), 3.82 (t, *J* = 5.6 Hz, 2H), 3.51 (t, *J* = 5.6 Hz, 2H), 3.01 (s, 3H).

<sup>13</sup>C NMR (101 MHz, CDCl<sub>3</sub>) δ 149.92, 131.50 (q, *J* = 31.5 Hz), 129.60, 124.47 (q, *J* = 272.6 Hz), 115.58, 113.22 (q, *J* = 4.2 Hz), 108.77 (q, *J* = 3.8 Hz), 60.05, 55.03, 38.80.

<sup>19</sup>F NMR (376 MHz, CDCl<sub>3</sub>) δ -62.73.

HRMS (ESI) calculated C<sub>10</sub>H<sub>13</sub>F<sub>3</sub>NO<sup>+</sup> [M+H]<sup>+</sup> *m/z* 220.0944, found 220.0944.

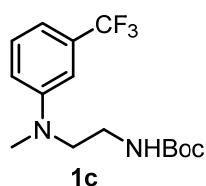

**tert-butyl (2-(methyl(3-(trifluoromethyl)phenyl)amino)ethyl)carbamate (1c):** as a yellow solid (58% yield).

<sup>1</sup>H NMR (400 MHz, CDCl<sub>3</sub>) δ 7.32 – 7.27 (m, 1H), 6.93 (d, *J* = 7.6 Hz, 1H), 6.91 – 6.85 (m, 2H), 3.49 (t, *J* = 6.4 Hz, 2H), 3.31 (q, *J* = 6.4 Hz, 2H), 2.99 (s, 3H), 1.43 (s, 9H).

<sup>13</sup>C NMR (101 MHz, CDCl<sub>3</sub>) δ 156.01, 149.40, 131.52 (q, *J* = 31.4 Hz), 129.64, 124.49 (q, *J* = 272.4 Hz), 115.02, 112.82 (q, *J* = 3.9 Hz), 108.18 (q), 52.01, 38.24 (d, *J* = 22.7 Hz), 28.33.

<sup>19</sup>F NMR (376 MHz, CDCl<sub>3</sub>) δ -61.08.

HRMS (ESI) calculated C<sub>15</sub>H<sub>22</sub>F<sub>3</sub>N<sub>2</sub>O<sub>2</sub><sup>+</sup> [M+H]<sup>+</sup> *m/z* 319.1628, found 319.1625.

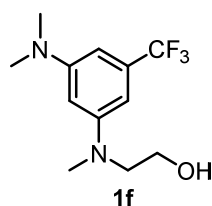

**2-((3-(dimethylamino)-5-(trifluoromethyl)phenyl)(methyl)amino)ethan-1-ol (1f):** as a yellow oil (60% yield).

<sup>1</sup>H NMR (400 MHz, CDCl<sub>3</sub>) δ 6.39 (t, *J* = 1.8 Hz, 1H), 6.37 (d, *J* = 2.0 Hz, 1H), 6.20 (t, *J* = 2.2 Hz, 1H), 3.81 (t, *J* = 5.6 Hz, 2H), 3.49 (t, *J* = 5.6 Hz, 2H), 2.99 (s, 3H), 2.97 (s, 6H).

<sup>13</sup>C NMR (101 MHz, CDCl<sub>3</sub>) δ 151.69, 151.17, 131.99 (q, *J* = 31.2 Hz), 124.79 (q, *J* = 273.0 Hz), 99.46, 98.72 (q, *J* = 4.0 Hz), 98.39 (q, *J* = 3.8 Hz), 60.16, 55.39, 40.58, 38.90.

<sup>19</sup>F NMR (376 MHz, CDCl<sub>3</sub>) δ -62.82.

HRMS (ESI) calculated C<sub>12</sub>H<sub>18</sub>F<sub>3</sub>N<sub>2</sub>O<sup>+</sup> [M+H]<sup>+</sup> *m/z* 263.1366, found 263.1363.

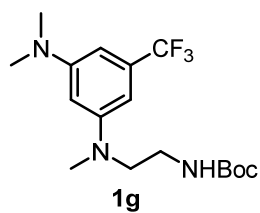

**tert-butyl (2-((3-(dimethylamino)-5-(trifluoromethyl)phenyl)(methyl)amino)ethyl)carbamate (1g):**  
as a yellow oil (78% yield).

**<sup>1</sup>H NMR (400 MHz, DMSO-*d*<sub>6</sub>)**  $\delta$  6.89 (t, *J* = 6.0 Hz, 1H), 6.26 (d, *J* = 15.4 Hz, 2H), 6.20 (s, 1H), 3.40 – 3.30 (m, 2H), 3.07 (q, *J* = 6.4 Hz, 2H), 2.92 (s, 6H), 2.91 (s, 3H), 1.35 (s, 9H).

**<sup>13</sup>C NMR (101 MHz, CDCl<sub>3</sub>)**  $\delta$  155.97, 151.72, 150.51, 131.86 (q, *J* = 30.9 Hz), 124.78 (q, *J* = 272.8 Hz), 98.91, 98.37 (q, *J* = 4.2 Hz), 97.91 (q, *J* = 3.6 Hz), 79.44, 52.40, 40.61, 38.58, 38.24, 28.36.

**<sup>19</sup>F NMR (376 MHz, DMSO-*d*<sub>6</sub>)**  $\delta$  -61.23.

**HRMS (ESI)** calculated C<sub>17</sub>H<sub>27</sub>F<sub>3</sub>N<sub>3</sub>O<sub>2</sub><sup>+</sup> [M+H]<sup>+</sup> *m/z* 362.2050, found 362.2045.

#### 6.4 The synthetic method for 1d, 1h and 1u-1v.

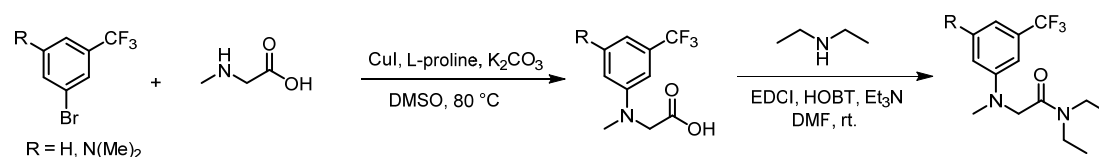

A mixture of aryl halide (1 equiv.), sarcosine (1.5 equiv.), K<sub>2</sub>CO<sub>3</sub> (2 equiv.), CuI (0.1 equiv.) and L-proline (0.2 equiv.) in DMSO was stirred overnight at 80 °C under argon. The reaction was quenched with water and extracted with ethyl acetate three times. The organic layer was washed with H<sub>2</sub>O and brine, dried over MgSO<sub>4</sub>, and concentrated in vacuo. The residue was purified by silica chromatography (DCM : MeOH = 10 : 1) to afford corresponding carboxylic acid derivatives.

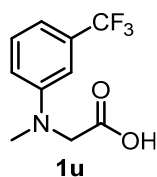

**N-methyl-N-(3-(trifluoromethyl)phenyl)glycine (1u):** as a white solid (84% yield).

**<sup>1</sup>H NMR (400 MHz, CDCl<sub>3</sub>)**  $\delta$  7.33 (t, *J* = 8.0 Hz, 1H), 7.05 – 6.97 (m, 1H), 6.89 (t, *J* = 2.1 Hz, 1H), 6.82 (dd, *J* = 8.4, 2.8 Hz, 1H), 4.14 (s, 2H), 3.09 (s, 3H).

**<sup>13</sup>C NMR (101 MHz, CDCl<sub>3</sub>)**  $\delta$  176.39, 148.74, 131.64 (q, *J* = 31.4 Hz), 129.74, 124.35 (q, *J* = 272.5 Hz), 115.16, 114.14 (q, *J* = 3.8 Hz), 108.64 (q, *J* = 4.0 Hz), 53.85, 39.47.

**<sup>19</sup>F NMR (376 MHz, CDCl<sub>3</sub>)**  $\delta$  -62.76.

**HRMS (ESI)** calculated C<sub>10</sub>H<sub>11</sub>F<sub>3</sub>NO<sub>2</sub><sup>+</sup> [M+H]<sup>+</sup> *m/z* 234.0736, found 234.0731.

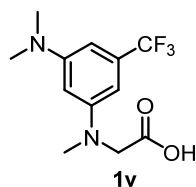

**N-(3-(dimethylamino)-5-(trifluoromethyl)phenyl)-N-methylglycine (1v):** as a white solid (78% yield).

**<sup>1</sup>H NMR (400 MHz, DMSO-*d*<sub>6</sub>)**  $\delta$  6.27 (t, *J* = 1.8 Hz, 1H), 6.20 (t, *J* = 1.9 Hz, 1H), 6.07 (t, *J* = 2.3 Hz, 1H), 4.12 (s, 2H), 3.00 (s, 3H), 2.91 (s, 6H).

**<sup>13</sup>C NMR (101 MHz, DMSO-*d*<sub>6</sub>)**  $\delta$  172.46, 151.90, 150.74, 130.80 (q, *J* = 30.0 Hz), 125.35 (q, *J* = 272.6 Hz), 99.00, 97.66 (t, *J* = 4.1 Hz), 97.11 (q, *J* = 4.2 Hz), 53.90, 40.51.

**<sup>19</sup>F NMR (376 MHz, CDCl<sub>3</sub>)**  $\delta$  -62.93.

**HRMS (ESI)** calculated C<sub>12</sub>H<sub>16</sub>F<sub>3</sub>N<sub>2</sub>O<sub>2</sub><sup>+</sup> [M+H]<sup>+</sup> *m/z* 277.1158, found 277.1159.

Compound **m2** or **m3** (1.0 equiv.), EDCI (2 equiv.), HOBT (2 equiv.) and triethylamine in DMF were added diethylamine (1.2 equiv.), and then the mixture was stirred at room temperature overnight. The mixture was added H<sub>2</sub>O and extracted with ethyl acetate. The organic layer was washed with saturated H<sub>2</sub>O, brine, dried over Na<sub>2</sub>SO<sub>4</sub>, and concentrated in vacuo. The residue was purified by silica chromatography (PE : EtOAc = 2 : 1) to afford the product.

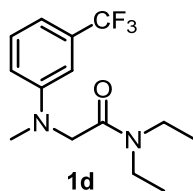

***N,N*-diethyl-2-(methyl(3-(trifluoromethyl)phenyl)amino)acetamide (1d):** as white solid (84% yield).

**<sup>1</sup>H NMR (400 MHz, CDCl<sub>3</sub>)**  $\delta$  7.29 (t, 1H), 6.93 (ddt,  $J = 7.7, 1.7, 0.8$  Hz, 1H), 6.82 (t,  $J = 2.2$  Hz, 1H), 6.78 (dd,  $J = 8.4, 2.7$  Hz, 1H), 4.13 (s, 2H), 3.46 – 3.27 (m, 4H), 3.10 (s, 3H), 1.26 (t,  $J = 7.1$  Hz, 3H), 1.12 (t,  $J = 7.1$  Hz, 3H).

**<sup>13</sup>C NMR (101 MHz, CDCl<sub>3</sub>)**  $\delta$  167.75, 149.56, 131.31 (q,  $J = 31.5$  Hz), 129.54, 124.52 (q,  $J = 272.4$  Hz), 115.06 (d,  $J = 1.5$  Hz), 113.21 (q,  $J = 3.8$  Hz), 108.44 (q,  $J = 4.1$  Hz), 53.81, 41.22, 40.51, 39.79, 14.34, 13.02.

**<sup>19</sup>F NMR (376 MHz, CDCl<sub>3</sub>)**  $\delta$  -62.78.

**HRMS (ESI)** calculated C<sub>14</sub>H<sub>20</sub>F<sub>3</sub>N<sub>2</sub>O<sup>+</sup> [M+H]<sup>+</sup>  $m/z$  289.1522, found 289.1519.

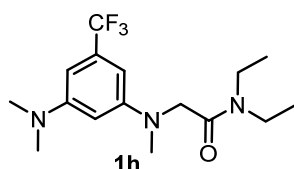

**2-((3-(dimethylamino)-5-(trifluoromethyl)phenyl)(methyl)amino)-*N,N*-diethylacetamide (1h):** as a white solid (79% yield).

**<sup>1</sup>H NMR (400 MHz, CDCl<sub>3</sub>)**  $\delta$  6.34 (t,  $J = 1.8$  Hz, 1H), 6.25 (t,  $J = 1.8$  Hz, 1H), 6.08 (t,  $J = 2.3$  Hz, 1H), 4.10 (s, 2H), 3.36 (dq,  $J = 17.6, 7.2$  Hz, 4H), 3.09 (s, 3H), 2.95 (s, 6H), 1.24 (t,  $J = 7.1$  Hz, 3H), 1.12 (t,  $J = 7.1$  Hz, 3H).

**<sup>13</sup>C NMR (101 MHz, CDCl<sub>3</sub>)**  $\delta$  168.35, 151.54, 150.53, 131.82 (q,  $J = 30.8$  Hz), 124.81 (q,  $J = 272.6$  Hz), 99.23, 98.84 (q,  $J = 4.0$  Hz), 98.19 (q,  $J = 4.0$  Hz), 54.44, 41.34, 40.65, 40.57, 39.95, 14.33, 13.04.

**<sup>19</sup>F NMR (376 MHz, CDCl<sub>3</sub>)**  $\delta$  -62.89.

**HRMS (ESI)** calculated C<sub>16</sub>H<sub>25</sub>F<sub>3</sub>N<sub>3</sub>O<sup>+</sup> [M+H]<sup>+</sup>  $m/z$  332.1944, found 332.1941.

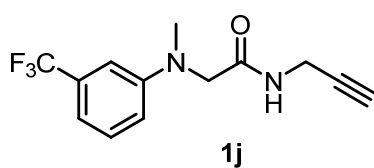

Compound **1u** (1.0 equiv.), EDCI (2 equiv.), HOBT (2 equiv.) and triethylamine in DMF were added propargylamine (1.2 equiv.), and then the mixture was stirred at room temperature overnight. The mixture was added H<sub>2</sub>O and extracted with ethyl acetate. The organic layer was washed with saturated H<sub>2</sub>O, brine, dried over Na<sub>2</sub>SO<sub>4</sub>, and concentrated in vacuo. The residue was purified by silica chromatography (PE : EtOAc = 2 : 1) to afford the yellow solid product (71% yield).

**<sup>1</sup>H NMR (400 MHz, CDCl<sub>3</sub>)**  $\delta$  7.36 (t,  $J = 8.1$  Hz, 1H), 7.12 – 7.06 (m, 1H), 6.93 (t,  $J = 2.1$  Hz, 1H), 6.85 (dd,  $J = 8.4, 2.8$  Hz, 1H), 6.63 (s, 1H), 4.08 (dd,  $J = 5.6, 2.5$  Hz, 2H), 3.92 (s, 2H), 3.07 (s, 3H), 2.20 (t,  $J = 2.6$  Hz, 1H).

$^{13}\text{C}$  NMR (101 MHz,  $\text{CDCl}_3$ )  $\delta$  169.54, 149.36, 131.98, 131.66, 129.96, 125.52, 122.82, 115.30, 115.26, 109.44, 109.40, 79.03, 71.74, 58.45, 39.86, 28.96.

$^{19}\text{F}$  NMR (376 MHz,  $\text{CDCl}_3$ )  $\delta$  -62.76.

HRMS (ESI) calculated  $\text{C}_{13}\text{H}_{14}\text{F}_3\text{N}_2\text{O}^+$   $[\text{M}+\text{H}]^+$   $m/z$  271.1053, found 271.1051.

### 6.5 The synthetic method for 1i, 1k and 1n.

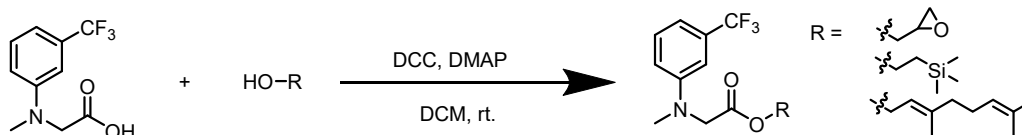

Compound **1u** (1.0 equiv.), DCC (2 equiv.) and DMAP (0.1 equiv.) in DCM was added glycidol (1.2 equiv.), and then the mixture was stirred at room temperature overnight. The mixture was added  $\text{H}_2\text{O}$  and extracted with dichloromethane three times. The organic layer was dried over  $\text{Na}_2\text{SO}_4$  and concentrated in vacuo. The residue was purified by silica chromatography (PE : EtOAc = 2 : 1) to afford corresponding products.

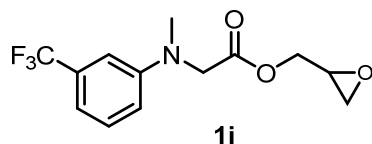

**oxiran-2-ylmethyl N-methyl-N-(3-(trifluoromethyl)phenyl)glycinate (1i)**: as a yellow oil (69% yield).

$^1\text{H}$  NMR (400 MHz,  $\text{CDCl}_3$ )  $\delta$  7.32 (td,  $J$  = 8.0, 1.0 Hz, 1H), 7.01 – 6.97 (m, 1H), 6.88 (t,  $J$  = 2.1 Hz, 1H), 6.82 (dd,  $J$  = 8.4, 2.7 Hz, 1H), 4.48 (dd,  $J$  = 12.3, 3.0 Hz, 1H), 4.15 (s, 2H), 3.97 (dd,  $J$  = 12.3, 6.2 Hz, 1H), 3.17 (ddt,  $J$  = 6.3, 4.1, 2.8 Hz, 1H), 3.10 (s, 3H), 2.81 (dd,  $J$  = 4.8, 4.1 Hz, 1H), 2.58 (dd,  $J$  = 4.9, 2.6 Hz, 1H).

$^{13}\text{C}$  NMR (101 MHz,  $\text{CDCl}_3$ )  $\delta$  170.11, 148.88, 131.53 (q,  $J$  = 31.3 Hz), 129.68, 124.39 (q,  $J$  = 272.2 Hz), 115.19, 113.90 (q,  $J$  = 4.0 Hz), 108.60 (q,  $J$  = 3.9 Hz), 65.37, 54.03, 49.08, 44.56, 39.52.

$^{19}\text{F}$  NMR (376 MHz,  $\text{CDCl}_3$ )  $\delta$  -62.74.

HRMS (ESI) calculated  $\text{C}_{13}\text{H}_{15}\text{F}_3\text{NO}_3^+$   $[\text{M}+\text{H}]^+$   $m/z$  290.0999, found 290.0995.

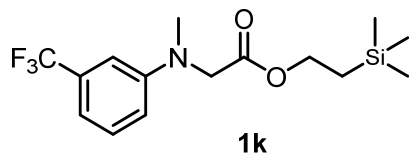

**2-(trimethylsilyl)ethyl N-methyl-N-(3-(trifluoromethyl)phenyl)glycinate (1k)**: as a yellow oil (51% yield).

$^1\text{H}$  NMR (400 MHz,  $\text{CDCl}_3$ )  $\delta$  7.31 (t,  $J$  = 8.1 Hz, 1H), 7.01 – 6.95 (m, 1H), 6.87 (t,  $J$  = 2.2 Hz, 1H), 6.81 (dd,  $J$  = 8.4, 2.7 Hz, 1H), 4.30 – 4.18 (m, 2H), 4.07 (s, 2H), 3.10 (s, 3H), 1.07 – 0.91 (m, 2H), 0.03 (d,  $J$  = 1.9 Hz, 9H).

$^{13}\text{C}$  NMR (101 MHz,  $\text{CDCl}_3$ )  $\delta$  172.12, 150.58, 133.05 (q,  $J$  = 31.6 Hz), 131.16, 126.00 (q,  $J$  = 272.5 Hz), 116.68 (d,  $J$  = 1.5 Hz), 115.22 (q,  $J$  = 3.9 Hz), 110.13 (q,  $J$  = 4.0 Hz), 65.07, 55.97, 41.14, 19.00, 0.00.

$^{19}\text{F}$  NMR (376 MHz,  $\text{CDCl}_3$ )  $\delta$  -62.76.

HRMS (ESI) calculated  $\text{C}_{15}\text{H}_{22}\text{F}_3\text{NNaO}_2\text{Si}^+$   $[\text{M}+\text{Na}]^+$   $m/z$  356.1264, found 356.1269.

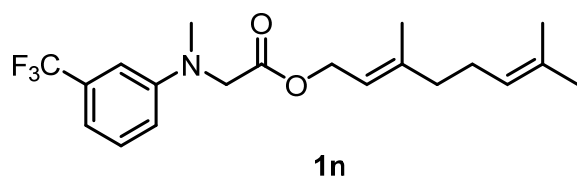

**(E)-3,7-dimethylocta-2,6-dien-1-yl N-methyl-N-(3-(trifluoromethyl)phenyl)glycinate (1n):** as a yellow oil (69% yield).

**<sup>1</sup>H NMR (400 MHz, CDCl<sub>3</sub>)**  $\delta$  7.30 (t,  $J$  = 8.0 Hz, 1H), 6.98 (d,  $J$  = 7.7 Hz, 1H), 6.87 (t,  $J$  = 2.2 Hz, 1H), 6.81 (dd,  $J$  = 8.4, 2.7 Hz, 1H), 5.32 (tq,  $J$  = 7.3, 1.4 Hz, 1H), 5.08 (tt,  $J$  = 6.7, 1.4 Hz, 1H), 4.65 (d,  $J$  = 7.2 Hz, 2H), 4.09 (s, 2H), 3.10 (s, 3H), 2.12 – 1.99 (m, 4H), 1.68 (dd,  $J$  = 7.0, 1.5 Hz, 6H), 1.61 (d,  $J$  = 1.4 Hz, 3H).

**<sup>13</sup>C NMR (101 MHz, CDCl<sub>3</sub>)**  $\delta$  170.39, 149.01, 143.24, 131.88, 131.48 (q,  $J$  = 31.5 Hz), 129.58, 124.43 (q,  $J$  = 272.3 Hz), 123.68, 117.71, 115.15, 113.68 (q,  $J$  = 3.9 Hz), 108.59 (q,  $J$  = 4.0 Hz), 61.91, 54.30, 39.58, 39.49, 26.26, 25.68, 17.67, 16.44.

**<sup>19</sup>F NMR (376 MHz, CDCl<sub>3</sub>)**  $\delta$  -62.74.

**HRMS (ESI)** calculated C<sub>20</sub>H<sub>27</sub>F<sub>3</sub>NO<sub>2</sub><sup>+</sup> [M+H]<sup>+</sup> m/z 370.1988, found 370.1985.

#### 6.6 The synthetic method for 1l, 1o and 1q.

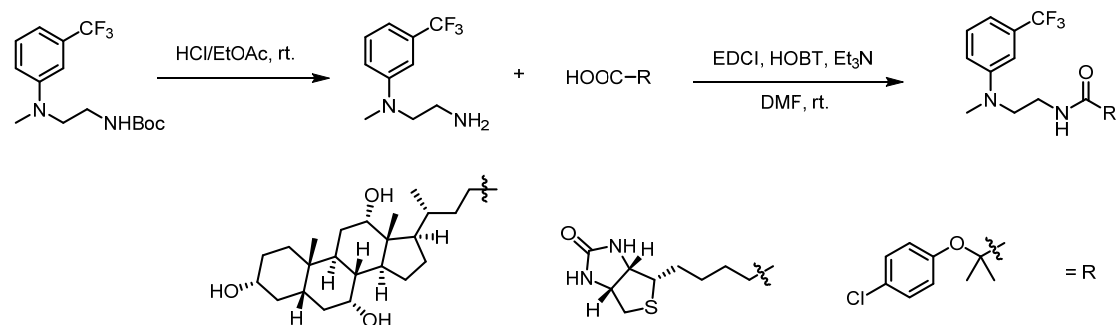

Compound **1c** (318 mg, 1.0 mmol) was dissolved in EtOAc (4 mL) and was added 4 M HCl/EtOAc (8 mL). The reaction mixture was stirred at room temperature for 6 h and concentrated to afford crude product for the next step without further purification.

D-Biotin (1.0 equiv.), or clofibric acid (1.0 equiv.), or cholic acid (1.0 equiv.), EDCI (2 equiv.), HOBT (2 equiv.) and triethylamine (2 equiv.) in DMF were added crude product from the previous step (1.2 equiv.), and then the mixture was stirred at room temperature overnight. The mixture was added H<sub>2</sub>O and extracted with ethyl acetate. The organic layer was washed with saturated H<sub>2</sub>O, brine, dried over Na<sub>2</sub>SO<sub>4</sub>, and concentrated in vacuo. The residue was purified by silica chromatography (PE : EtOAc = 2 : 1) to afford corresponding products.

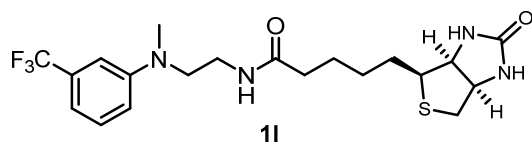

**N-(2-(methyl(3-(trifluoromethyl)phenyl)amino)ethyl)-5-((3aS,4S,6aR)-2-oxohexahydro-1H-thieno[3,4-d]imidazol-4-yl)pentanamide (1l):** as a white solid (40% yield).



**<sup>1</sup>H NMR (400 MHz, DMSO-*d*<sub>6</sub>)**  $\delta$  7.89 (t, *J* = 5.8 Hz, 1H), 7.35 (t, *J* = 8.0 Hz, 1H), 6.98 (dd, *J* = 8.5, 2.6 Hz, 1H), 6.93 – 6.84 (m, 2H), 6.41 (s, 1H), 6.35 (s, 1H), 4.34 – 4.26 (m, 1H), 4.11 (ddd, *J* = 7.7, 4.4, 1.9 Hz, 1H), 3.41 (t, *J* = 6.7 Hz, 2H), 3.20 (q, *J* = 6.4 Hz, 2H), 3.07 (ddd, *J* = 8.5, 6.2, 4.4 Hz, 1H), 2.94 (s, 3H), 2.81 (dd, *J* = 12.4, 5.1 Hz, 1H), 2.57 (d, *J* = 12.4 Hz, 1H), 2.00 (t, *J* = 7.4 Hz, 2H), 1.66 – 1.37 (m, 4H), 1.33 – 1.20 (m, 2H).

**<sup>13</sup>C NMR (101 MHz, DMSO-*d*<sub>6</sub>)**  $\delta$  172.86, 163.20, 149.65, 130.41 (1, *J* = 30.6 Hz), 130.33, 125.10 (q, *J* = 272.9 Hz), 111.84 (q, *J* = 4.3 Hz), 107.63 (q, *J* = 4.2 Hz), 61.49, 59.67, 55.85, 51.13, 40.31, 38.47, 36.23, 35.67, 28.68, 28.48, 25.55.

**<sup>19</sup>F NMR (376 MHz, DMSO-*d*<sub>6</sub>)**  $\delta$  -61.10.

**HRMS (ESI)** calculated C<sub>20</sub>H<sub>28</sub>F<sub>3</sub>N<sub>4</sub>O<sub>2</sub>S<sup>+</sup> [M+H]<sup>+</sup> *m/z* 445.1880, found 445.1876.

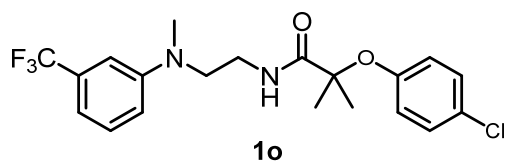

**2-(4-chlorophenoxy)-2-methyl-N-(2-(methyl(3-(trifluoromethyl)phenyl)amino)ethyl)propanamide (1o):** as a yellow solid (71% yield).

**<sup>1</sup>H NMR (400 MHz, Chloroform-*d*)**  $\delta$  7.33 – 7.24 (m, 1H), 7.23 – 7.16 (m, 2H), 6.97 – 6.86 (m, 4H), 6.80 – 6.72 (m, 2H), 3.56 – 3.49 (m, 4H), 2.97 (s, 3H), 1.42 (s, 6H).

**<sup>13</sup>C NMR (101 MHz, Chloroform-*d*)**  $\delta$  174.85, 152.55, 149.38, 131.57 (q, *J* = 31.5 Hz), 129.73, 129.25, 128.79, 124.45 (q, *J* = 272.4 Hz), 122.93, 115.19, 113.04 (q, *J* = 3.7 Hz), 108.30 (q, *J* = 3.8 Hz), 81.95, 51.40, 38.22, 37.01, 24.80.

**<sup>19</sup>F NMR (376 MHz, CDCl<sub>3</sub>)**  $\delta$  -62.69.

**HRMS (ESI)** calculated C<sub>20</sub>H<sub>23</sub>ClF<sub>3</sub>N<sub>2</sub>O<sub>2</sub><sup>+</sup> [M+H]<sup>+</sup> *m/z* 415.1395, found 415.1391.

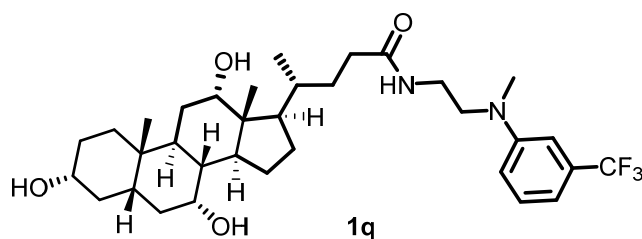

**(S)-N-(2-(methyl(3-(trifluoromethyl)phenyl)amino)ethyl)-4-((3S,5R,7S,8S,9R,10R,12R,13S,14R,17S)-3,7,12-trihydroxy-10,13-dimethylhexadecahydro-1H-cyclopenta[a]phenanthren-17-yl)pentanamide (1q):** as a white solid (57% yield).

**<sup>1</sup>H NMR (400 MHz, DMSO-*d*<sub>6</sub>)**  $\delta$  7.88 (t, *J* = 5.8 Hz, 1H), 7.33 (t, *J* = 8.0 Hz, 1H), 6.97 (dd, *J* = 8.5, 2.5 Hz, 1H), 6.92 – 6.83 (m, 2H), 4.05 – 3.68 (m, 4H), 3.61 (q, *J* = 3.0 Hz, 1H), 3.41 (t, *J* = 6.6 Hz, 2H), 3.19 (q, *J* = 6.2 Hz, 3H), 2.93 (s, 3H), 2.30 – 2.10 (m, 2H), 2.07 – 1.85 (m, 3H), 1.81 – 1.55 (m, 6H), 1.51 – 1.06 (m, 12H), 0.99 – 0.78 (m, 8H), 0.56 (s, 3H).

**<sup>13</sup>C NMR (101 MHz, DMSO-*d*<sub>6</sub>)**  $\delta$  173.47, 149.64, 130.42 (q, *J* = 31.1 Hz), 125.08 (q, *J* = 272.5 Hz), 115.56, 111.80 (q, *J* = 3.8 Hz), 107.60 (q, *J* = 3.9 Hz), 79.65, 71.48, 70.92, 66.72, 51.15, 46.52, 46.18, 42.00, 41.82, 38.43, 36.28, 35.78, 35.59, 35.36, 34.84, 32.92, 31.99, 30.87, 29.03, 27.71, 26.68, 23.25, 23.06, 17.54, 12.77.

**<sup>19</sup>F NMR (376 MHz, DMSO-*d*<sub>6</sub>)**  $\delta$  -61.15.

**HRMS (ESI)** calculated  $C_{34}H_{52}F_3N_2O_4^+$   $[M+H]^+$   $m/z$  609.3874, found 609.3865.

### 6.7 The synthetic method for **1w**, **1m** and **1p**.

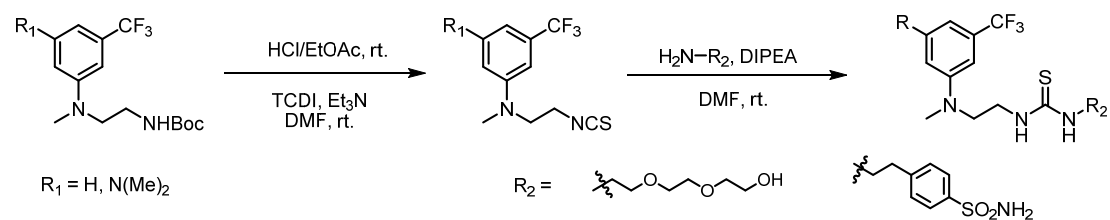

Compound **1c** (318 mg, 1.0 mmol) or **1g** (361 mg, 1.0 mmol) was dissolved in EtOAc (4.0 mL) and was added 4 M HCl/EtOAc (8 mL). The reaction mixture was stirred at room temperature for 6 h and concentrated to afford the product for the next step without further purification. The product was dissolved in anhydrous DMF (8 mL), added TCDI (214 mg, 1.2 mmol) and triethylamine (202 mg, 2.0 mmol) at room temperature. The reaction mixture was stirred for 6 h and added H<sub>2</sub>O and ethyl acetate. The organic layer was washed with brine, dried over Na<sub>2</sub>SO<sub>4</sub>, and then concentrated in vacuo. The residue was purified by silica chromatography (PE : EtOAc = 10 : 1) to afford corresponding products.

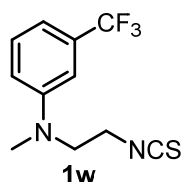

**2-(4-chlorophenoxy)-2-methyl-N-(2-(methyl(3-(trifluoromethyl)phenyl)amino)ethyl)propanamide (1w):** as a yellow oil (74% yield).

**<sup>1</sup>H NMR (400 MHz, CDCl<sub>3</sub>)**  $\delta$  7.39 – 7.31 (m, 1H), 7.00 (ddt,  $J = 7.6, 1.6, 0.8$  Hz, 1H), 6.90 – 6.81 (m, 2H), 3.70 (d,  $J = 2.0$  Hz, 4H), 3.08 (s, 3H).

**<sup>13</sup>C NMR (101 MHz, CDCl<sub>3</sub>)**  $\delta$  148.17, 131.78 (q,  $J = 31.9$  Hz), 129.90, 124.35 (q,  $J = 272.4$  Hz), 115.15, 113.75 (q,  $J = 3.9$  Hz), 108.41 (q,  $J = 3.8$  Hz), 52.18, 42.62, 39.18.

**<sup>19</sup>F NMR (376 MHz, CDCl<sub>3</sub>)**  $\delta$  -62.75.

**HRMS (ESI)** calculated  $C_{11}H_{12}F_3N_2S^+$   $[M+H]^+$   $m/z$  261.0668, found 261.0662.

Compound **1w** (1 equiv.) and DIPEA (2 equiv.) were dissolved in DMF and added 2-(2-(2-aminoethoxy)ethoxy)ethan-1-ol (1.2 equiv.) or 4-(2-aminoethyl)benzenesulfonamide (1.2 equiv.) at 0 °C. The reaction mixture was stirred at room temperature for 6 h and added H<sub>2</sub>O and ethyl acetate. The organic layer was washed with brine, dried over Na<sub>2</sub>SO<sub>4</sub>, and then concentrated in vacuo. The residue was purified by silica chromatography (DCM : MeOH = 10 : 1) to afford corresponding products.

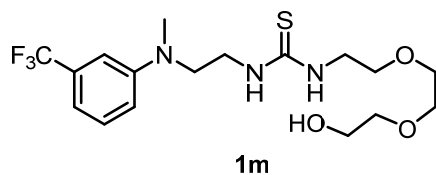

**1-(2-(2-(2-hydroxyethoxy)ethoxy)ethyl)-3-(2-(methyl(3-(trifluoromethyl)phenyl)amino)ethyl)thiourea (1m):** as a yellow oil (95% yield).

**<sup>1</sup>H NMR (400 MHz, Chloroform-*d*)**  $\delta$  7.29 (ddt,  $J = 8.3, 6.5, 0.9$  Hz, 1H), 6.98 – 6.89 (m, 3H), 6.84 (s, 1H), 6.75 (s, 1H), 3.76 (q,  $J = 6.2$  Hz, 2H), 3.68 – 3.55 (m, 12H), 3.54 – 3.48 (m, 2H), 2.99 (s, 3H).

**<sup>13</sup>C NMR (101 MHz, Chloroform-*d*)**  $\delta$  183.30, 149.52, 131.48 (q,  $J = 31.5$  Hz), 129.67, 124.49 (q,  $J = 272.4$  Hz), 115.21, 112.78 (d,  $J = 3.4$  Hz), 108.23 (q,  $J = 3.5$  Hz), 77.24, 72.20, 70.00, 69.86, 61.61, 51.31, 44.27, 41.84, 38.25.

**<sup>19</sup>F NMR (376 MHz, CDCl<sub>3</sub>)**  $\delta$  -62.64.

**HRMS (ESI)** calculated C<sub>17</sub>H<sub>27</sub>F<sub>3</sub>N<sub>3</sub>O<sub>3</sub>S<sup>+</sup> [M+H]<sup>+</sup>  $m/z$  410.1720, found 410.1716.

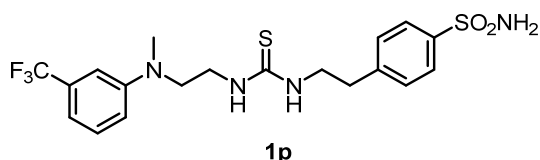

**4-(2-(3-(2-(methyl(3-(trifluoromethyl)phenyl)amino)ethyl)thioureido)ethyl)benzenesulfonamide (1p):** as white solid (93% yield).

**<sup>1</sup>H NMR (400 MHz, DMSO-*d*<sub>6</sub>)**  $\delta$  7.75 (d,  $J = 8.3$  Hz, 2H), 7.57-7.52 (brs., 2H), 7.40 (d,  $J = 8.4$  Hz, 2H), 7.34 (t,  $J = 8.0$  Hz, 1H), 7.29 (s, 2H), 7.03 (dd,  $J = 12.0, 3.7$  Hz, 1H), 7.00 (s, 1H), 6.88 (d,  $J = 7.6$  Hz, 1H), 3.67 – 3.46 (m, 6H), 2.95 (s, 3H), 2.90 – 2.82 (m, 2H).

**<sup>13</sup>C NMR (101 MHz, DMSO-*d*<sub>6</sub>)**  $\delta$  162.79, 149.74, 144.04, 142.58, 130.30, 131.04 – 129.90 (q,  $J = 30.0$  Hz), 129.59, 126.20, 125.12 (q,  $J = 272.5$  Hz), 115.61, 111.90 (q,  $J = 4.5$  Hz), 107.80 (1,  $J = 4.1$  Hz), 50.88, 36.25, 34.96, 31.24.

**<sup>19</sup>F NMR (376 MHz, DMSO-*d*<sub>6</sub>)**  $\delta$  -61.05.

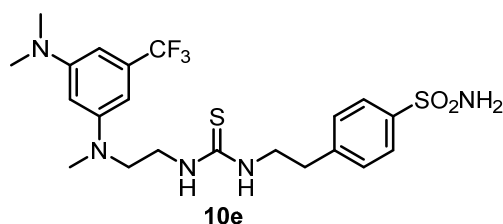

**HRMS (ESI)** calculated C<sub>19</sub>H<sub>24</sub>F<sub>3</sub>N<sub>4</sub>O<sub>2</sub>S<sub>2</sub><sup>+</sup> [M+H]<sup>+</sup>  $m/z$  461.1287, found 461.1283.

**4-(2-(3-(2-((3-(dimethylamino)-5-(trifluoromethyl)phenyl)(methyl)amino)ethyl)thioureido)ethyl)benzenesulfonamide (10e)** as yellow solid (93% yield).

**<sup>1</sup>H NMR (400 MHz, DMSO-*d*<sub>6</sub>)**  $\delta$  7.75 (d,  $J = 1.9$  Hz, 1H), 7.74 (d,  $J = 1.9$  Hz, 1H), 7.63 – 7.50 (m, 2H), 7.40 (s, 1H), 7.38 (s, 1H), 7.29 (s, 2H), 6.36 (s, 1H), 6.25 (d,  $J = 9.1$  Hz, 2H), 3.68 – 3.45 (m, 6H), 2.93 (s, 9H), 2.85 (t,  $J = 7.5$  Hz, 2H).

**<sup>13</sup>C NMR (101 MHz, DMSO-*d*<sub>6</sub>)**  $\delta$  151.94, 150.72, 144.03, 142.56, 130.89 (q,  $J = 29.9$  Hz), 129.58, 126.18, 125.41 (q,  $J = 272.7$  Hz), 99.17 – 98.89 (m), 97.50 – 97.16 (m), 51.10, 40.78, 38.42, 35.00.

**<sup>19</sup>F NMR (376 MHz, DMSO-*d*<sub>6</sub>)**  $\delta$  -61.16.

**HRMS (ESI)** calculated C<sub>21</sub>H<sub>29</sub>F<sub>3</sub>N<sub>5</sub>O<sub>2</sub>S<sub>2</sub><sup>+</sup> [M+H]<sup>+</sup>  $m/z$  504.1709, found 504.1707.

### 6.8 The synthetic method for 1r and 1s.

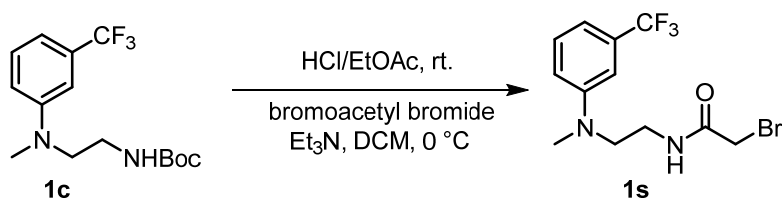

Compound **1c** (318 mg, 1.0 mmol) was dissolved in EtOAc (4.0 mL) and was added 4 M HCl/EtOAc (8.0 mL). The reaction mixture was stirred at room temperature for 6 h and concentrated to afford the product for the next step without further purification. The above product and triethylamine (202 mg, 2.0 mmol) were dissolved in DCM and added bromoacetyl bromide (222 mg, 1.1 mmol) dropwise at 0 °C. The reaction mixture was stirred at room temperature for 6 h, added H<sub>2</sub>O, and extracted with DCM three times. The organic layer was dried over Na<sub>2</sub>SO<sub>4</sub> and then concentrated in vacuo. The residue was purified by silica chromatography (PE : EtOAc = 2 : 1) to afford **2-bromo-N-(2-(methyl(3-(trifluoromethyl)phenyl)amino)ethyl)acetamide (1s)** as white solid (79% yield).

<sup>1</sup>H NMR (400 MHz, CDCl<sub>3</sub>) δ 7.32 (tt, *J* = 7.6, 0.9 Hz, 1H), 6.96 (ddt, *J* = 7.6, 1.6, 0.8 Hz, 1H), 6.92 (d, *J* = 8.1 Hz, 2H), 3.82 (s, 2H), 3.59 – 3.46 (m, 4H), 3.01 (s, 3H).

<sup>13</sup>C NMR (101 MHz, CDCl<sub>3</sub>) δ 165.84, 149.21, 131.64 (q, *J* = 31.8 Hz), 129.79, 124.42 (q, *J* = 272.5 Hz), 115.29, 113.33 (q, *J* = 3.65 Hz), 108.49 (q, *J* = 3.9 Hz), 51.39, 38.58, 37.82, 28.96.

<sup>19</sup>F NMR (376 MHz, CDCl<sub>3</sub>) δ -62.74.

HRMS (ESI) calculated C<sub>12</sub>H<sub>15</sub>BrF<sub>3</sub>N<sub>2</sub>O<sup>+</sup> [M+H]<sup>+</sup> *m/z* 339.0314, found 339.0313.

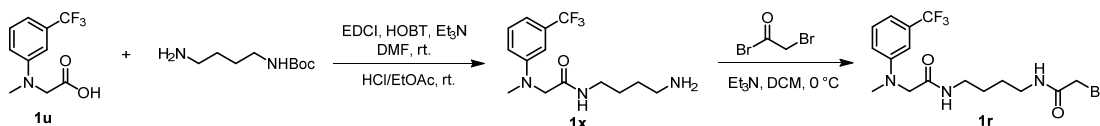

Compound **1u** (1.0 equiv.), EDCI (2 equiv.), HOBT (2 equiv.) and triethylamine (2 equiv.) in DMF was added *tert*-butyl *N*-(4-aminobutyl)carbamate (1.2 equiv.), and then the mixture was stirred at room temperature overnight. The mixture was added H<sub>2</sub>O and extracted with ethyl acetate. The organic layer was washed with saturated H<sub>2</sub>O, brine, dried over Na<sub>2</sub>SO<sub>4</sub>, and concentrated in vacuo. The residue was purified by silica chromatography (PE : EtOAc = 2 : 1) to afford corresponding products. The obtained product was dissolved in EtOAc (4 mL) and was added 4 M HCl/EtOAc (8 mL). The reaction mixture was stirred at room temperature for 6 h and concentrated to afford the product for the next step without further purification.

Compound **1x** (1.0 equiv.) and triethylamine (2.0 equiv.) were dissolved in DCM and added bromoacetyl bromide (1.2 equiv.) dropwise at 0 °C. The reaction mixture was stirred at room temperature for 6 h, added H<sub>2</sub>O, and extracted with DCM three times. The organic layer was dried over Na<sub>2</sub>SO<sub>4</sub> and then concentrated in vacuo. The residue was purified by silica chromatography (PE : EtOAc = 2 : 1) to afford **2-bromo-N-(4-(2-(methyl(3-(trifluoromethyl)phenyl)amino)acetamido)butyl)acetamide (1r)** as a white solid (82% yield).

**<sup>1</sup>H NMR (400 MHz, CDCl<sub>3</sub>)**  $\delta$  7.36 (t,  $J$  = 8.0 Hz, 1H), 7.07 (ddt,  $J$  = 7.6, 1.6, 0.9 Hz, 1H), 6.91 (t,  $J$  = 2.0 Hz, 1H), 6.85 (dd,  $J$  = 8.4, 2.7 Hz, 1H), 6.64 – 6.49 (m, 2H), 3.90 (s, 2H), 3.83 (s, 2H), 3.32 (q,  $J$  = 6.4 Hz, 2H), 3.25 (q,  $J$  = 6.6 Hz, 2H), 3.08 (s, 3H), 1.56 – 1.44 (m, 4H).

**<sup>13</sup>C NMR (101 MHz, CDCl<sub>3</sub>)**  $\delta$  169.74, 165.57, 149.26, 131.73 (q,  $J$  = 31.7 Hz), 129.92, 124.20 (q,  $J$  = 272.2 Hz), 115.94, 114.98 (q,  $J$  = 3.7 Hz), 109.21 (q,  $J$  = 3.8 Hz), 58.44, 39.95, 39.63, 38.68, 29.16, 26.87, 26.45.

**<sup>19</sup>F NMR (376 MHz, CDCl<sub>3</sub>)**  $\delta$  -62.73.

**HRMS (ESI)** calculated C<sub>16</sub>H<sub>22</sub>BrF<sub>3</sub>N<sub>3</sub>O<sub>2</sub><sup>+</sup> [M+H]<sup>+</sup>  $m/z$  424.0842, found 424.0838.

### 6.9 The synthetic method for 10a-10f.

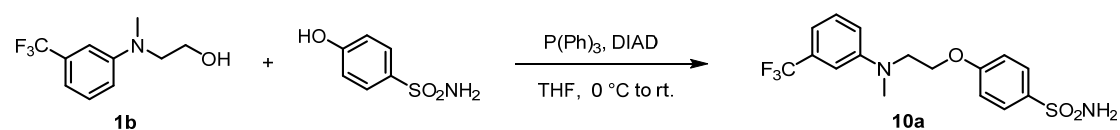

Compound **1b** (1 equiv.), 4-hydroxybenzenesulfonamide (1.0 equiv.), and triphenylphosphine (1.1 equiv.) were dissolved in dry THF and added DIAD (1.1 equiv.) at 0 °C under argon. The reaction mixture was stirred at room temperature for 8 h, added H<sub>2</sub>O, and extracted with ethyl acetate three times. The organic layer was washed with brine, dried over Na<sub>2</sub>SO<sub>4</sub>, and then concentrated in vacuo. The residue was purified by silica chromatography (DCM : MeOH = 10 : 1) to afford **4-(2-(methyl(3-(trifluoromethyl)phenyl)amino)ethoxy)benzenesulfonamide (10a)** as a white solid (56% yield).

**<sup>1</sup>H NMR (400 MHz, DMSO-*d*<sub>6</sub>)**  $\delta$  7.76 – 7.71 (m, 2H), 7.37 (ddd,  $J$  = 8.6, 7.6, 1.0 Hz, 1H), 7.20 (s, 2H), 7.05 (dq,  $J$  = 8.6, 2.6, 2.2 Hz, 3H), 6.97 (d,  $J$  = 2.3 Hz, 1H), 6.95 – 6.89 (m, 1H), 4.22 (t,  $J$  = 5.5 Hz, 2H), 3.82 (t,  $J$  = 5.5 Hz, 2H), 3.03 (s, 3H).

**<sup>13</sup>C NMR (101 MHz, DMSO-*d*<sub>6</sub>)**  $\delta$  161.17, 149.65, 136.85, 130.41 (q,  $J$  = 30.8 Hz), 130.38, 128.16, 125.06 (q,  $J$  = 272.5 Hz), 116.00, 114.88, 112.27 (q,  $J$  = 3.8 Hz), 108.10 (q,  $J$  = 4.1 Hz), 66.25, 51.14, 38.98.

**<sup>19</sup>F NMR (376 MHz, DMSO-*d*<sub>6</sub>)**  $\delta$  -61.11.

**HRMS (ESI)** calculated C<sub>16</sub>H<sub>18</sub>F<sub>3</sub>N<sub>2</sub>O<sub>3</sub>S<sup>+</sup> [M+H]<sup>+</sup>  $m/z$  375.0985, found 375.0982.

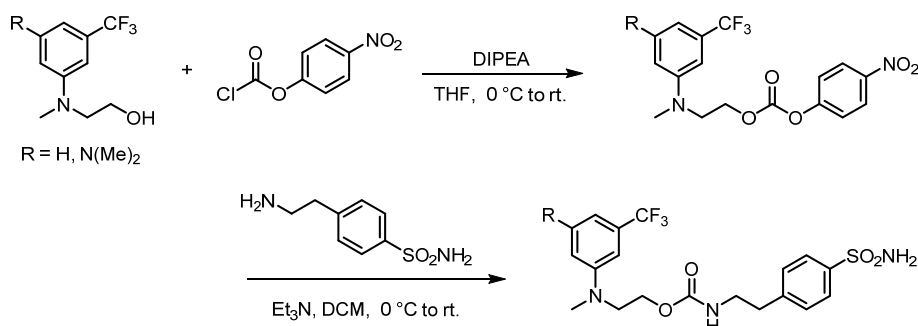

Compound **1b/1f** (1 equiv.) and 4-nitrophenyl chloroformate (1.5 equiv.) were dissolved in dry THF and added DIPEA (1.1 equiv.) at 0 °C under argon. The reaction mixture was stirred at room temperature for 6 h, added H<sub>2</sub>O, and extracted with ethyl acetate three times. The organic layer was washed with brine, dried over Na<sub>2</sub>SO<sub>4</sub>, and then concentrated in vacuo. The residue was purified by silica chromatography (PE : EtOAc = 2 : 1) to afford corresponding products.

Then the obtained product (1.0 equiv.) and 4-(2-aminoethyl)benzenesulfonamide (1.2 equiv.) was dissolved in DCM and added triethylamine (2.0 equiv.) at 0 °C. The reaction mixture was stirred at room temperature for 8 h, added H<sub>2</sub>O, and extracted with DCM three times. The organic layer was dried over Na<sub>2</sub>SO<sub>4</sub> and then concentrated in vacuo. The residue was purified by silica chromatography (DCM : MeOH = 10 : 1) to afford corresponding products.

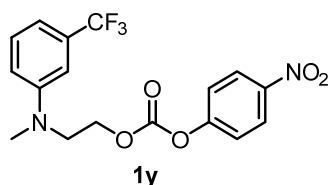

**2-(methyl(3-(trifluoromethyl)phenyl)amino)ethyl (4-nitrophenyl) carbonate (1y)** as a yellow oil (97% yield).

**<sup>1</sup>H NMR (400 MHz, CDCl<sub>3</sub>)**  $\delta$  8.24 (d,  $J$  = 2.2 Hz, 1H), 8.23 (d,  $J$  = 2.2 Hz, 1H), 7.33 (ddt,  $J$  = 8.4, 7.6, 0.8 Hz, 1H), 7.24 (d,  $J$  = 2.2 Hz, 1H), 7.22 (d,  $J$  = 2.2 Hz, 1H), 6.98 (ddt,  $J$  = 7.7, 1.6, 0.8 Hz, 1H), 6.96 – 6.90 (m, 2H), 4.48 (t,  $J$  = 5.7 Hz, 2H), 3.76 (t,  $J$  = 5.7 Hz, 2H), 3.05 (s, 3H).

**<sup>13</sup>C NMR (101 MHz, CDCl<sub>3</sub>)**  $\delta$  155.36, 152.52, 148.91, 145.49, 131.65 (q,  $J$  = 31.7 Hz), 129.78, 125.31, 124.43 (q,  $J$  = 272.5 Hz), 121.77, 115.10, 113.35 (q,  $J$  = 4.0 Hz), 108.40 (q,  $J$  = 4.1 Hz), 66.17, 50.81, 38.57.

**<sup>19</sup>F NMR (376 MHz, CDCl<sub>3</sub>)**  $\delta$  -62.72.

**HRMS (ESI)** calculated C<sub>17</sub>H<sub>16</sub>F<sub>3</sub>N<sub>2</sub>O<sub>5</sub><sup>+</sup> [M+H]<sup>+</sup>  $m/z$  385.1006, found 385.1002.

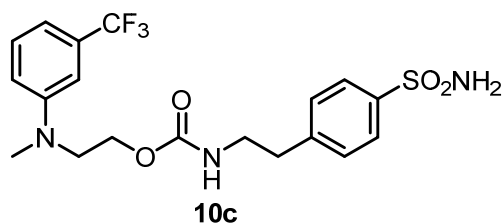

**2-(methyl(3-(trifluoromethyl)phenyl)amino)ethyl (4-sulfamoylphenethyl)carbamate (10c)** as a white solid (76% yield).

**<sup>1</sup>H NMR (400 MHz, DMSO-*d*<sub>6</sub>)**  $\delta$  7.73 (d,  $J$  = 8.2 Hz, 1H), 7.42 – 7.21 (m, 3H), 7.02 – 6.96 (m, 1H), 6.90 (d,  $J$  = 7.0 Hz, 1H), 4.09 (t,  $J$  = 5.8 Hz, 1H), 3.58 (t,  $J$  = 5.9 Hz, 1H), 3.21 (q,  $J$  = 6.8 Hz, 1H), 2.94 (s, 1H), 2.76 (t,  $J$  = 7.3 Hz, 1H).

**<sup>13</sup>C NMR (101 MHz, DMSO-*d*<sub>6</sub>)**  $\delta$  156.52, 149.53, 143.99, 142.52, 130.44 (q,  $J$  = 30.9 Hz), 130.39, 129.57, 125.06 (q,  $J$  = 272.6 Hz), 115.82, 112.12 (d,  $J$  = 4.0 Hz), 107.72 (q,  $J$  = 5.5, 3.9 Hz), 61.19, 51.03, 41.87, 38.82, 35.52.

**<sup>19</sup>F NMR (376 MHz, DMSO-*d*<sub>6</sub>)**  $\delta$  -61.12.

**HRMS (ESI)** calculated C<sub>19</sub>H<sub>23</sub>F<sub>3</sub>N<sub>3</sub>O<sub>4</sub>S<sup>+</sup> [M+H]<sup>+</sup>  $m/z$  446.1356, found 446.1353.

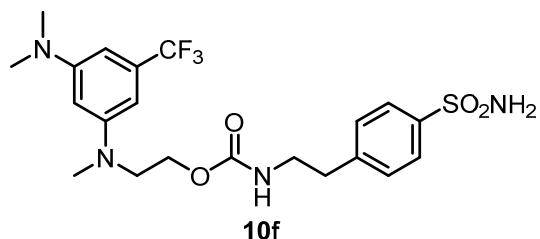

**2-((3-(dimethylamino)-5-(trifluoromethyl)phenyl)(methylamino)ethyl (4-sulfamoylphenethyl)carbamate (10f)** as a white solid (47% yield).

<sup>1</sup>H NMR (400 MHz, Chloroform-*d*)  $\delta$  7.81 (d, *J* = 8.1 Hz, 2H), 7.28 (d, *J* = 8.0 Hz, 2H), 6.37 – 6.30 (m, 2H), 6.13 (t, *J* = 2.3 Hz, 1H), 5.03 (s, 2H), 4.72 (t, *J* = 6.9 Hz, 1H), 4.22 (t, *J* = 5.9 Hz, 2H), 3.55 (t, *J* = 5.9 Hz, 2H), 3.47 – 3.26 (m, 2H), 2.96 (d, *J* = 3.8 Hz, 9H), 2.83 (t, *J* = 7.0 Hz, 2H).

<sup>13</sup>C NMR (101 MHz, Chloroform-*d*)  $\delta$  156.22, 151.72, 150.37, 144.24, 140.28, 131.71 (d, *J* = 31.1 Hz), 129.52, 126.71, 123.36 (d, *J* = 272.8 Hz), 98.82, 98.28 (q, *J* = 4.0 Hz), 98.00 (q, *J* = 3.7 Hz), 62.07, 51.58, 41.78, 40.62, 38.51, 36.01.

<sup>19</sup>F NMR (376 MHz, CDCl<sub>3</sub>)  $\delta$  -62.75.

HRMS (ESI) calculated C<sub>21</sub>H<sub>28</sub>F<sub>3</sub>N<sub>4</sub>O<sub>4</sub>S<sup>+</sup> [M+H]<sup>+</sup> *m/z* 489.1778, found 489.1776.

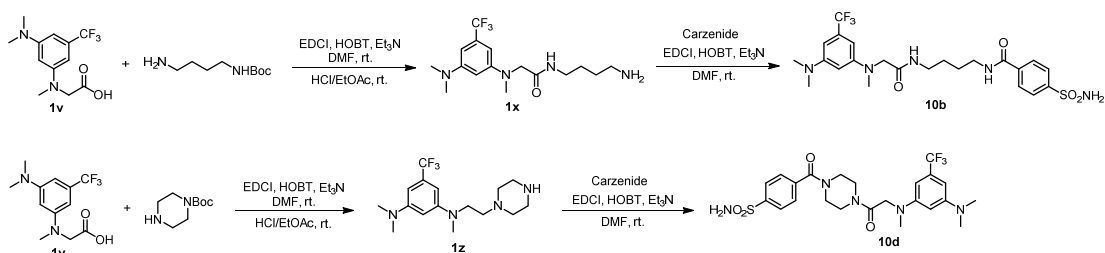

Compound **1v** (1.0 equiv.), EDCI (2.0 equiv.), HOBT (2.0 equiv.) and triethylamine (2.0 equiv.) in DMF were added *tert*-butyl 1-piperazinecarboxylate (1.2 equiv.) or *tert*-butyl *N*-(4-aminobutyl)carbamate (1.2 equiv.), and then the mixture was stirred at room temperature overnight. The mixture was added H<sub>2</sub>O and extracted with ethyl acetate. The organic layer was washed with saturated H<sub>2</sub>O, brine, dried over Na<sub>2</sub>SO<sub>4</sub>, and concentrated in vacuo. The residue was purified by silica chromatography (PE : EtOAc = 2 : 1) to afford corresponding products. The obtained product was dissolved in EtOAc (4.0 mL) and was added 4 M HCl/EtOAc (8.0 mL). The reaction mixture was stirred at room temperature for 6 h and concentrated to afford the product for the next step without further purification.

Compound **1x** or **1z** (1.0 equiv.), EDCI (2.0 equiv.), HOBT (2.0 equiv.) and triethylamine (2.0 equiv.) in DMF were added *tert*-butyl 1-piperazinecarboxylate (1.2 equiv.), and then the mixture was stirred at room temperature overnight. The mixture was added H<sub>2</sub>O and extracted with ethyl acetate. The organic layer was washed with saturated H<sub>2</sub>O, brine, dried over Na<sub>2</sub>SO<sub>4</sub>, and concentrated in vacuo. The residue was purified by silica chromatography (DCM : MeOH = 10 : 1) to afford corresponding products. The obtained product was dissolved in EtOAc (4 mL) and was added 4 M HCl/EtOAc (8 mL). The reaction mixture was stirred at room temperature for 6 h and concentrated to afford products **10b** and **10d**.

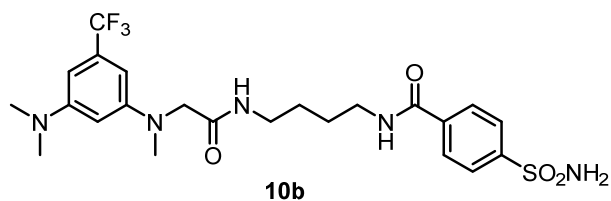

***N*-(4-(2-((3-(dimethylamino)-5-(trifluoromethyl)phenyl)(methyl)amino)acetamido)butyl)-4-sulfamoylbenzamide (10b)** as a white solid (56% yield).

<sup>1</sup>H NMR (400 MHz, CDCl<sub>3</sub>) δ 8.60 (t, *J* = 5.6 Hz, 1H), 8.01 – 7.92 (m, 3H), 7.92 – 7.85 (m, 2H), 7.47 (s, 2H), 6.26 (t, *J* = 1.8 Hz, 1H), 6.19 (t, *J* = 1.8 Hz, 1H), 6.02 (t, *J* = 2.2 Hz, 1H), 3.90 (s, 2H), 3.25 (q, *J* = 6.3 Hz, 2H), 3.10 (q, *J* = 6.4 Hz, 2H), 3.02 (s, 3H), 2.88 (s, 6H), 1.55 – 1.39 (m, 4H).

<sup>13</sup>C NMR (101 MHz, CDCl<sub>3</sub>) δ 174.60, 170.30, 156.60, 155.58, 151.36, 142.77, 135.50 (q, *J* = 30.1 Hz), 133.01, 130.80, 130.12 (q, *J* = 273.0 Hz), 103.78, 102.37 (q, *J* = 4.2 Hz), 102.00 (q, *J* = 4.0 Hz), 61.07, 45.26, 44.95, 43.32, 31.93, 31.58.

<sup>19</sup>F NMR (376 MHz, CDCl<sub>3</sub>) δ -56.51.

HRMS (ESI) calculated C<sub>23</sub>H<sub>31</sub>F<sub>3</sub>N<sub>5</sub>O<sub>4</sub>S<sup>+</sup> [M+H]<sup>+</sup> *m/z* 530.2043, found 530.2042.

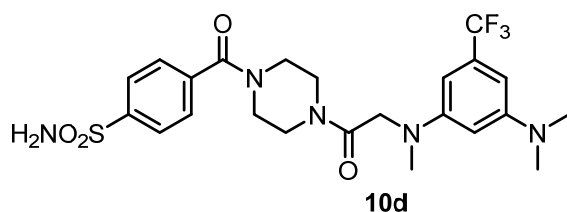

**4-(4-(2-((3-(dimethylamino)-5-(trifluoromethyl)phenyl)(methyl)amino)ethyl)piperazine-1-carbonyl)benzenesulfonamide (10d)** as yellow solid (47% yield).

<sup>1</sup>H NMR (400 MHz, DMSO-*d*<sub>6</sub>) δ 7.90 (d, *J* = 8.0 Hz, 2H), 7.63 (d, *J* = 8.1 Hz, 2H), 7.48 (s, 2H), 6.24 (t, *J* = 1.7 Hz, 1H), 6.22 (s, 1H), 6.04 (d, *J* = 2.4 Hz, 1H), 4.35 (d, *J* = 23.5 Hz, 2H), 3.77 – 3.40 (m, 6H), 3.32 – 3.19 (m, 2H), 2.97 (s, 3H), 2.91 (s, 6H).

<sup>13</sup>C NMR (101 MHz, DMSO-*d*<sub>6</sub>) δ 168.52, 168.06, 151.83, 151.17, 145.39, 139.33, 130.65 (d, *J* = 30.0 Hz), 128.10, 126.33, 125.42 (d, *J* = 272.3 Hz), 99.90 – 98.68 (m), 97.41 (q, *J* = 3.4 Hz), 53.36, 40.57.

<sup>19</sup>F NMR (376 MHz, CDCl<sub>3</sub>) δ -56.37.

HRMS (ESI) calculated C<sub>23</sub>H<sub>29</sub>F<sub>3</sub>N<sub>5</sub>O<sub>4</sub>S<sup>+</sup> [M+H]<sup>+</sup> *m/z* 528.1887, found 528.1887.

### 6.10 The synthetic method for the conjugate probes, 10g and 10k.

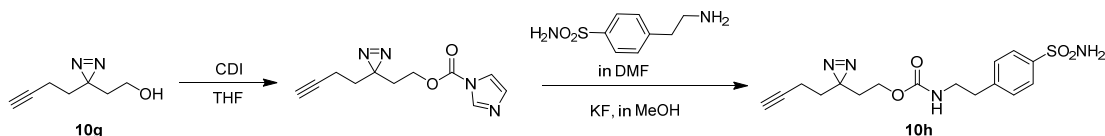

The synthesis method of compound **10g** can be found in previous literature<sup>6</sup>.

Compound **10g** (1.0 equiv.) and CDI (3.0 equiv.) were dissolved in dry THF, and the reaction mixture was stirred at room temperature for 6 h, and extracted with ethyl acetate. The organic layer was washed with brine, dried over Na<sub>2</sub>SO<sub>4</sub>, and then concentrated in vacuo without purification. Then the obtained product (1.0 equiv.) and 4-(2-aminoethyl)benzenesulfonamide (1.5 equiv.) was dissolved in DMF and added DBU (2.0 equiv.) at 0 °C. The reaction mixture was stirred at room temperature for 8 h, added H<sub>2</sub>O, and extracted with EA three times. The organic layer was dried over Na<sub>2</sub>SO<sub>4</sub> and then concentrated



in vacuo. The residue was purified by silica chromatography (DCM : MeOH = 10 : 1) to afford the desired products **10h**.

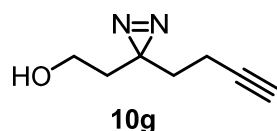

**2-(3-(But-3-ynyl)-3H-diazirin-3-yl)ethanol (10g):** as a yellow oil (56 % yield)

<sup>1</sup>H NMR (400 MHz, CDCl<sub>3</sub>) δ 3.48 (t, *J* = 6.2 Hz, 2H), 2.08-1.95 (m, 3H), 1.74-1.63 (m, 5H).

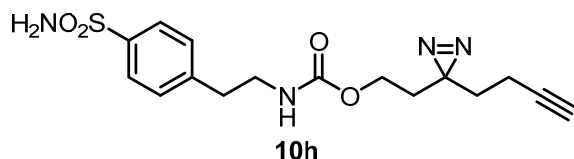

**2-(3-(but-3-yn-1-yl)-3H-diazirin-3-yl)ethyl (4-sulfamoylphenethyl)carbamate (10h):** as a yellow solid (82 % yield)

<sup>1</sup>H NMR (400 MHz, CDCl<sub>3</sub>) δ 7.83-7.78 (m, 2H), 7.37-7.27 (m, 2H), 5.49 (s, 2H), 3.90 (t, *J* = 6.2 Hz, 2H), 3.47-3.35 (m, 2H), 2.91-2.78 (m, 2H), 2.03-1.93 (m, 2H), 1.73-1.51 (m, 3H).

<sup>13</sup>C NMR (101 MHz, CDCl<sub>3</sub>) δ 156.18, 144.19, 140.37, 129.57, 126.64, 82.75, 69.47, 59.64, 41.81, 35.98, 32.51, 32.15, 26.52, 13.23.

HRMS (ESI) calculated C<sub>16</sub>H<sub>21</sub>N<sub>4</sub>O<sub>4</sub>S<sup>+</sup> [M+H]<sup>+</sup> *m/z* 365.1278, found 365.1271.

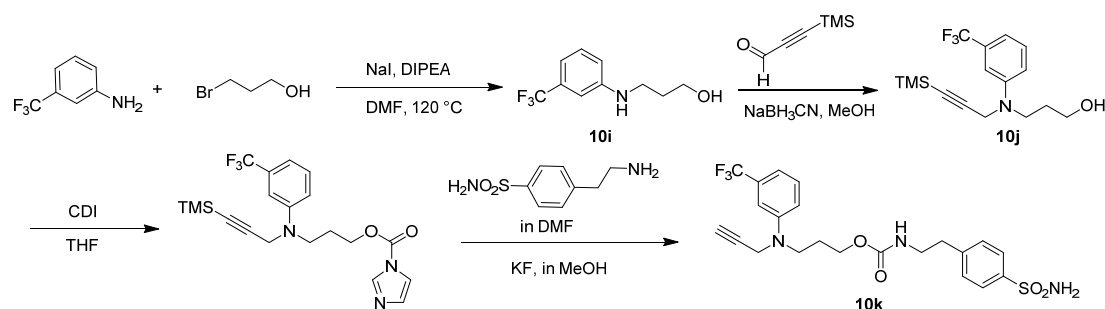

3-aminobenzotrifluoride (1.0 equiv.), 3-bromo-1-propanol (1.5 equiv.), sodium iodide (1.0 equiv.), and DIPEA (3.0 equiv.) in DMF was stirred at 120 °C overnight. The reaction was quenched by water, and extracted with ethyl acetate. The organic layer was washed with brine, dried over Na<sub>2</sub>SO<sub>4</sub>, and then concentrated in vacuo without purification. The residue was further purified by silica chromatography (PE : EA = 2 : 1) to afford corresponding product, **10i**.

Compound **10i** (1.0 equiv.), 3-(trimethylsilyl)-2-propynal (2.0 equiv.), and a few drops of acetic acid were dissolved in MeOH. After 6 h reaction, the mixture was concentrated in vacuo and purified by silica chromatography (PE : EA = 2 : 1) to afford corresponding product, **10j**.

Compound **10j** (1.0 equiv.) and CDI (3.0 equiv.) were dissolved in dry THF, and the reaction mixture was stirred at room temperature for 6 h, and extracted with ethyl acetate. The organic layer was washed with brine, dried over Na<sub>2</sub>SO<sub>4</sub>, and then concentrated in vacuo without purification. Then the obtained product (1.0 equiv.) and 4-(2-aminoethyl)benzenesulfonamide (1.5 equiv.) was dissolved in DMF and added DBU (2.0 equiv.) at 0 °C. The reaction mixture was stirred at room temperature for 8 h, added H<sub>2</sub>O, and extracted with EA three times. The organic layer was dried over Na<sub>2</sub>SO<sub>4</sub> and then concentrated

in vacuo. The residue was purified by silica chromatography (DCM : MeOH = 10 : 1) to afford product **10k**.

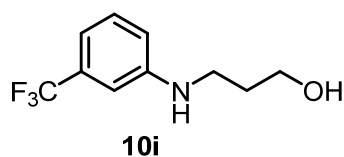

**3-((3-(trifluoromethyl)phenyl)amino)propan-1-ol (10i):** as a yellow oil (50 % yield)

<sup>1</sup>H NMR (400 MHz, DMSO-*d*<sub>6</sub>) δ 7.24 (t, *J* = 7.8 Hz, 1H), 6.89-6.71 (m, 3H), 6.08 (t, *J* = 5.5 Hz, 1H), 4.55 (t, *J* = 5.1 Hz, 1H), 3.56-3.50 (m, 2H), 3.19-3.04 (m, 2H), 1.72 (p, *J* = 6.5 Hz, 2H).

<sup>13</sup>C NMR (101 MHz, DMSO-*d*<sub>6</sub>) δ 149.93, 130.62 (q, *J* = 30.7 Hz), 130.16, 125.06 (q, *J* = 272.2 Hz), 115.59, 111.53 (q, *J* = 4.0 Hz), 107.98 (q, *J* = 4.0 Hz), 58.97, 40.04, 32.18.

<sup>19</sup>F NMR (376 MHz, DMSO-*d*<sub>6</sub>) δ -61.53.

HRMS (ESI) calculated C<sub>10</sub>H<sub>13</sub>F<sub>3</sub>NO<sup>+</sup> [M+H]<sup>+</sup> m/z 220.0944, found 220.0942.

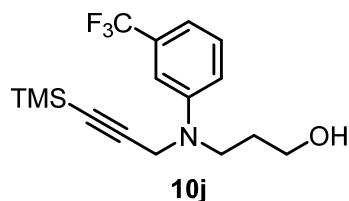

**3-((3-(trifluoromethyl)phenyl)(3-(trimethylsilyl)prop-2-yn-1-yl)amino)propan-1-ol (10j):** as a white solid (88 % yield)

<sup>1</sup>H NMR (400 MHz, DMSO-*d*<sub>6</sub>) δ 7.42-7.30 (m, 1H), 7.08-7.00 (m, 2H), 6.94 (d, *J* = 7.5 Hz, 1H), 4.66 (t, *J* = 4.9 Hz, 1H), 4.17 (s, 2H), 3.48-3.42 (m, 4H), 1.76-1.64 (m, 2H), 0.07 (s, 9H).

<sup>13</sup>C NMR (101 MHz, DMSO-*d*<sub>6</sub>) δ 147.69, 129.55, 129.51 (q, *J* = 30.8 Hz), 124.31 (q, *J* = 272.4 Hz), 116.23, 112.14 (d, *J* = 4.0 Hz), 108.46 (t, *J* = 4.1 Hz), 102.74, 87.87, 57.81, 47.54, 40.15, 29.49, -0.50.

<sup>19</sup>F NMR (376 MHz, DMSO-*d*<sub>6</sub>) δ -61.52.

HRMS (ESI) calculated C<sub>16</sub>H<sub>23</sub>F<sub>3</sub>NOSi<sup>+</sup> [M+H]<sup>+</sup> m/z 330.1496, found 330.1496.

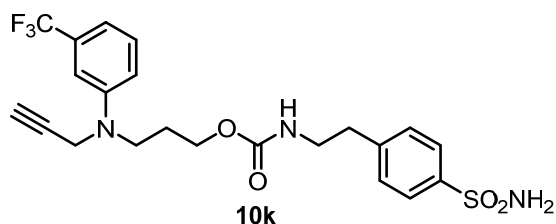

**3-((prop-2-yn-1-yl(3-(trifluoromethyl)phenyl)amino)propyl (4-sulfamoylphenethyl)carbamate (10k):** as a white solid (53 % yield)

<sup>1</sup>H NMR (400 MHz, DMSO-*d*<sub>6</sub>) δ 7.78-7.66 (m, 2H), 7.43-7.34 (m, 3H), 7.29 (s, 3H), 7.06 (dd, *J* = 8.5, 2.6 Hz, 1H), 7.02-6.93 (m, 2H), 4.17 (d, *J* = 2.4 Hz, 2H), 3.99 (t, *J* = 6.3 Hz, 2H), 3.45 (t, *J* = 7.2 Hz, 2H), 3.29-3.21 (m, 2H), 3.16 (t, *J* = 2.3 Hz, 1H), 2.80 (t, *J* = 7.2 Hz, 2H), 1.93-1.77 (m, 2H).

<sup>13</sup>C NMR (101 MHz, DMSO-*d*<sub>6</sub>) δ 156.67, 148.26, 144.05, 142.54, 130.46, 130.39 (q, *J* = 30.7 Hz), 129.60, 126.17, 124.98 (q, *J* = 272.3 Hz), 117.05, 113.29 (q, *J* = 4.1 Hz), 109.16 (q, *J* = 3.7 Hz), 80.69, 75.03, 61.92, 47.87, 41.90, 35.60, 26.88.

**<sup>19</sup>F NMR (376 MHz, DMSO-*d*<sub>6</sub>)**  $\delta$  -61.14.

**HRMS (ESI)** calculated C<sub>22</sub>H<sub>25</sub>F<sub>3</sub>N<sub>3</sub>O<sub>4</sub>S<sup>+</sup> [M+H]<sup>+</sup> m/z 484.1512, found 484.1508.

## 7. Computational details

DFT calculations were performed using Gaussian 09 program package.<sup>7</sup> All structures were optimized at the M06-2X(D3) level of theory<sup>8</sup> in experimental solvents ACN/H<sub>2</sub>O (v/v = 1/1) with the 6-31+G\*\* basis set,<sup>9-10</sup> and structures in triplet state were optimized by using UDFT method at the same level of theory. Vibrational frequencies were calculated at the same level of theory to evaluate zero-point vibrational energy and thermal correction at 298.15 K. The self-consistent reaction field (SCRF) method based on the universal solvation model SMD was adopted to evaluate the effect of solvent.<sup>11</sup> All single-point energies were computed using the same function with the ma-TZVP basis set (**Table S8**),<sup>12</sup> zero-point energy frequency correction factor is 0.967.<sup>13</sup> The intrinsic reaction coordinate (IRC) path was traced to check the energy profiles connecting each transition state to two associated minima of the proposed mechanism.<sup>14</sup> For TD-DFT calculation, the excitation energy from S<sub>0</sub> to S<sub>1</sub> was computed at M06-2X(D3)/ma-TZVP level in the same solvent model. The 3D diagrams of molecules were generated using CYLView20.<sup>15</sup>

**Table S8.** Electronic energies ( $E_e$ ), correct enthalpies ( $H$ ) and Gibbs free energies ( $G$ ) for all stationary points (in Hartree), obtained at the M06-2X(D3)/6-31+G\*\* theoretical level. The imaginary frequencies (in cm<sup>-1</sup>) for all transition states were listed.

| Structures               | <sup>a</sup> ZPE | $E_e$      | <sup>b</sup> $E_e$ | <sup>c</sup> $H_e$ | $H$        | <sup>d</sup> $G_e$ | $G$        | <sup>e</sup> $G$ | Imaginary Frequency |
|--------------------------|------------------|------------|--------------------|--------------------|------------|--------------------|------------|------------------|---------------------|
| <b>1a</b>                | 0.17970          | -703.03684 | -703.29052         | 0.19275            | -702.84409 | 0.14030            | -702.89654 | -703.15615       | -                   |
| <b>IM1</b>               | 0.20327          | -779.44914 | -779.73362         | 0.22013            | -779.22900 | 0.15910            | -779.29004 | -779.58123       | -                   |
| <b>TS1</b>               | 0.20015          | -779.36501 | -779.65183         | 0.21667            | -779.14835 | 0.15594            | -779.20907 | -779.50249       | 88.22               |
| <b>IM2</b>               | 0.20429          | -779.46134 | -779.74378         | 0.21993            | -779.24141 | 0.16167            | -779.29968 | -779.58886       | -                   |
| <b>IM3</b>               | 0.19197          | -679.03073 | -679.27273         | 0.20522            | -678.82551 | 0.15309            | -678.87765 | -679.12598       | -                   |
| <b>IM4</b>               | 0.21582          | -755.45180 | -755.72308         | 0.23232            | -755.21947 | 0.17215            | -755.27965 | -755.55806       | -                   |
| <b>TS2</b>               | 0.21355          | -755.41937 | -755.68967         | 0.22906            | -755.19031 | 0.17139            | -755.24797 | -755.52532       | 583.56              |
| <b>5a</b>                | 0.17669          | -578.60678 | -578.80761         | 0.18892            | -578.41786 | 0.13876            | -578.46802 | -578.67468       | -                   |
| <b>IM1-T<sub>1</sub></b> | 0.19826          | -779.33660 | -779.61993         | 0.21601            | -779.12059 | 0.15237            | -779.18423 | -779.47410       | -                   |
| <b>TS3-T<sub>1</sub></b> | 0.19871          | -779.33115 | -779.61413         | 0.21557            | -779.11558 | 0.15412            | -779.17703 | -779.46657       | 370.55              |
| <b>IM5-T<sub>1</sub></b> | 0.19825          | -779.34565 | -779.63032         | 0.21573            | -779.12992 | 0.15244            | -779.19321 | -779.48442       | -                   |
| <b>TS4-T<sub>1</sub></b> | 0.19716          | -779.32520 | -779.60778         | 0.21305            | -779.11215 | 0.15330            | -779.17190 | -779.46099       | 500.22              |
| <b>IM6-T<sub>1</sub></b> | 0.19913          | -779.34490 | -779.62717         | 0.21574            | -779.12917 | 0.15369            | -779.19121 | -779.48004       | -                   |
| <b>H<sub>2</sub>O</b>    | 0.02131          | -76.40975  | -76.44080          | 0.02509            | -76.38466  | 0.00365            | -76.40610  | -76.43785        | -                   |
| <b>HF</b>                | 0.00918          | -100.42098 | -100.46240         | 0.01248            | -100.40850 | -0.00725           | -100.42823 | -100.46995       | -                   |
| <b>1a-T<sub>1</sub></b>  | 0.17498          | -702.92194 | -703.17514         | 0.18884            | -702.73309 | 0.13395            | -702.78798 | -703.04696       | -                   |

<sup>a</sup> Zero-point correction energy;

<sup>b</sup> Electronic energy obtained at the M06-2X(D3)/ma-TZVP/SMD (ACN/H<sub>2</sub>O = 1:1, v/v) // M06-2X(D3)/6-31+G\*\*/SMD (ACN/H<sub>2</sub>O = 1:1, v/v) theoretical level;

<sup>c</sup> Thermal correction to enthalpy;

<sup>d</sup> Thermal correction to Gibbs free energy;

<sup>e</sup> Gibbs free energy obtained at the M06-2X(D3)/ma-TZVP/SMD (ACN/H<sub>2</sub>O = 1:1, v/v) // M06-2X(D3)/6-31+G\*\*/SMD (ACN/H<sub>2</sub>O = 1/1, v/v) theoretical level.

Cartesian coordinates of all stationary points in this work.

1a

|   | X         | Y         | Z         |
|---|-----------|-----------|-----------|
| C | -0.969453 | 0.348148  | -0.012864 |
| C | -0.932693 | 1.737857  | 0.033444  |
| C | 0.321932  | 2.348856  | 0.024627  |
| C | 1.491119  | 1.601800  | -0.035917 |
| C | 0.186405  | -0.427839 | -0.072084 |
| C | 1.453961  | 0.188389  | -0.103588 |
| C | -2.281522 | -0.378703 | 0.008258  |
| H | -1.842935 | 2.324361  | 0.081538  |
| H | 0.392016  | 3.431617  | 0.072252  |
| H | 2.440135  | 2.124248  | -0.031826 |
| H | 0.092266  | -1.507638 | -0.097529 |
| N | 2.611734  | -0.559981 | -0.209208 |
| F | -2.453665 | -1.155480 | -1.084330 |
| F | -3.340425 | 0.448328  | 0.059849  |
| F | -2.390346 | -1.209025 | 1.069593  |
| C | 3.878802  | 0.088868  | 0.097615  |
| C | 2.530405  | -1.985050 | 0.076717  |
| H | 2.175017  | -2.185018 | 1.099016  |
| H | 3.521343  | -2.423820 | -0.040738 |
| H | 4.067398  | 0.918735  | -0.588513 |
| H | 4.682733  | -0.635832 | -0.033540 |
| H | 3.914059  | 0.471394  | 1.128856  |
| H | 1.862025  | -2.486541 | -0.628317 |

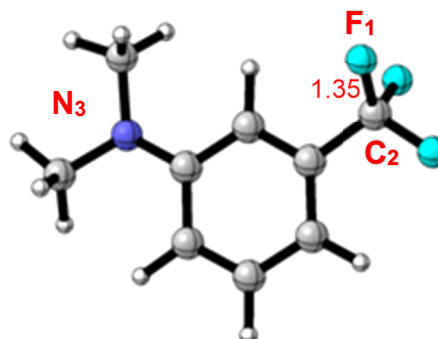

IM1

|   | X         | Y         | Z         |
|---|-----------|-----------|-----------|
| H | -2.815560 | 2.403762  | 2.385360  |
| O | -2.765261 | 1.559496  | 1.918171  |
| H | -2.529657 | 0.914074  | 2.597593  |
| C | -0.698056 | 0.052381  | -0.451921 |
| C | -0.769095 | 1.383787  | -0.847412 |
| C | 0.425585  | 2.102721  | -0.905382 |
| C | 1.642173  | 1.512514  | -0.587734 |
| C | 0.507317  | -0.566042 | -0.126758 |
| C | 1.717739  | 0.152337  | -0.204510 |
| C | -1.944252 | -0.775551 | -0.338017 |
| H | -1.717810 | 1.850851  | -1.085988 |

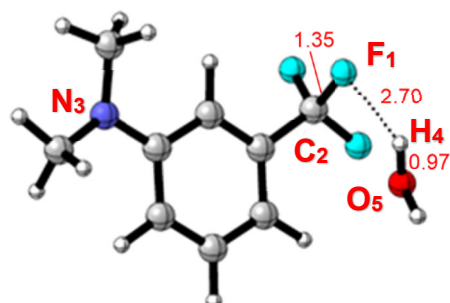

|   |           |           |           |
|---|-----------|-----------|-----------|
| H | 0.409303  | 3.148580  | -1.197726 |
| H | 2.540267  | 2.115958  | -0.640637 |
| H | 0.496166  | -1.604683 | 0.182935  |
| N | 2.930736  | -0.454352 | 0.069572  |
| F | -1.871879 | -1.908877 | -1.073263 |
| F | -3.048631 | -0.127401 | -0.745005 |
| F | -2.178664 | -1.179191 | 0.931336  |
| C | 4.075421  | 0.403971  | 0.343013  |
| C | 2.910186  | -1.734791 | 0.762004  |
| H | 2.421067  | -1.669883 | 1.746025  |
| H | 3.937174  | -2.072167 | 0.904150  |
| H | 4.324537  | 1.013550  | -0.529223 |
| H | 4.938458  | -0.225023 | 0.562657  |
| H | 3.899827  | 1.072324  | 1.199521  |
| H | 2.393617  | -2.491598 | 0.165659  |

### TS1

|   | X         | Y         | Z         |
|---|-----------|-----------|-----------|
| H | -2.534095 | 0.718982  | 2.336076  |
| O | -3.002771 | 0.123933  | 1.738453  |
| H | -2.422413 | -0.742021 | 1.662351  |
| C | -0.707852 | 0.477342  | -0.532048 |
| C | -0.711506 | 1.847973  | -0.186780 |
| C | 0.499841  | 2.400774  | 0.182680  |
| C | 1.662574  | 1.629554  | 0.200757  |
| C | 0.456087  | -0.323120 | -0.515833 |
| C | 1.683518  | 0.255699  | -0.165511 |
| C | -1.914152 | -0.115392 | -0.900931 |
| H | -1.627304 | 2.427778  | -0.199747 |
| H | 0.556464  | 3.444565  | 0.471728  |
| H | 2.583220  | 2.111993  | 0.509321  |
| H | 0.376087  | -1.371757 | -0.772846 |
| N | 2.848949  | -0.465036 | -0.171888 |
| F | -2.033449 | -1.338417 | -1.233449 |
| F | -3.008573 | 0.526087  | -1.027275 |
| F | -1.693188 | -1.876796 | 1.441972  |
| C | 4.022235  | 0.087733  | 0.492785  |
| C | 2.759715  | -1.913042 | -0.294757 |
| H | 2.179200  | -2.360861 | 0.524956  |
| H | 3.767130  | -2.327733 | -0.279852 |
| H | 4.339565  | 1.019013  | 0.015204  |
| H | 4.839527  | -0.626922 | 0.401237  |

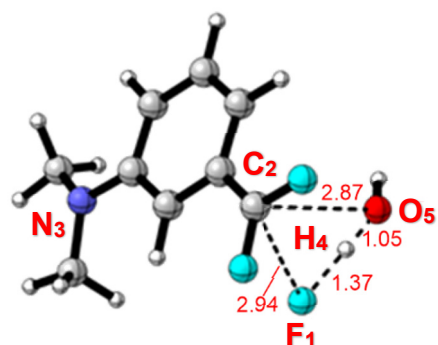

|   |          |           |           |
|---|----------|-----------|-----------|
| H | 3.839921 | 0.280811  | 1.559354  |
| H | 2.296333 | -2.193041 | -1.245601 |

### IM2

|   | X         | Y         | Z         |
|---|-----------|-----------|-----------|
| H | 2.053218  | 0.448646  | 1.725203  |
| O | 2.425622  | 0.651043  | 0.849257  |
| H | 2.115409  | 2.238041  | 0.432044  |
| C | 0.690141  | -0.827809 | -0.014528 |
| C | 0.400758  | -2.182243 | 0.120438  |
| C | -0.943620 | -2.555847 | 0.157909  |
| C | -1.960634 | -1.615600 | 0.053533  |
| C | -0.311027 | 0.136120  | -0.120196 |
| C | -1.669263 | -0.240216 | -0.107897 |
| C | 2.115516  | -0.340790 | -0.052781 |
| H | 1.190428  | -2.919422 | 0.207846  |
| H | -1.206184 | -3.602849 | 0.279221  |
| H | -2.988156 | -1.955690 | 0.098411  |
| H | -0.024022 | 1.177198  | -0.215997 |
| N | -2.674541 | 0.698183  | -0.258728 |
| F | 2.419796  | 0.190979  | -1.269457 |
| F | 2.991032  | -1.372287 | 0.115543  |
| F | 1.959618  | 3.147612  | 0.209527  |
| C | -4.028765 | 0.313759  | 0.114808  |
| C | -2.330943 | 2.100575  | -0.072232 |
| H | -1.913296 | 2.298380  | 0.926850  |
| H | -3.232115 | 2.701070  | -0.198883 |
| H | -4.384286 | -0.513567 | -0.504954 |
| H | -4.691879 | 1.161928  | -0.056926 |
| H | -4.102696 | 0.016869  | 1.172060  |
| H | -1.606601 | 2.429342  | -0.822670 |

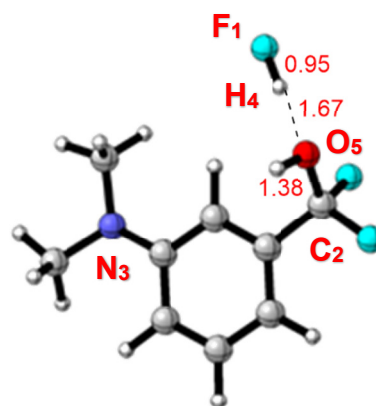

### IM3

|   | X         | Y         | Z         |
|---|-----------|-----------|-----------|
| C | -1.463075 | 0.190524  | 0.109009  |
| C | -1.487775 | 1.601494  | 0.038081  |
| C | -0.308763 | 2.334481  | -0.041994 |
| C | 0.935876  | 1.707990  | -0.072242 |
| C | 0.964657  | 0.315340  | -0.028175 |
| C | -0.201693 | -0.440224 | 0.059169  |

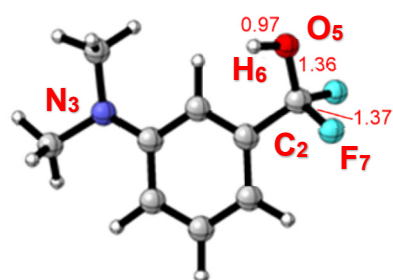

|   |           |           |           |
|---|-----------|-----------|-----------|
| H | -2.430401 | 2.135348  | 0.046940  |
| H | -0.366540 | 3.418179  | -0.090162 |
| H | 1.851806  | 2.284262  | -0.139388 |
| H | -0.121189 | -1.520143 | 0.091112  |
| N | -2.629094 | -0.548961 | 0.236281  |
| C | -2.561501 | -1.971987 | -0.066178 |
| H | -1.880666 | -2.483867 | 0.618324  |
| H | -3.551813 | -2.407087 | 0.070232  |
| H | -2.232737 | -2.163559 | -1.099236 |
| C | -3.886576 | 0.106074  | -0.099175 |
| H | -3.909599 | 0.456644  | -1.142241 |
| H | -4.700397 | -0.604822 | 0.048200  |
| H | -4.071974 | 0.957730  | 0.559971  |
| C | 2.287834  | -0.411246 | -0.014585 |
| F | 3.259462  | 0.368249  | -0.595911 |
| F | 2.719716  | -0.587293 | 1.271599  |
| O | 2.308598  | -1.650976 | -0.571156 |
| H | 1.861877  | -1.645423 | -1.433125 |

#### IM4

|       | X         | Y         | Z         |
|-------|-----------|-----------|-----------|
| ----- |           |           |           |
| C     | -1.589781 | -0.367221 | -0.152482 |
| C     | -1.686727 | -1.643369 | 0.445818  |
| C     | -0.544782 | -2.372915 | 0.760800  |
| C     | 0.730576  | -1.869118 | 0.512777  |
| C     | 0.832746  | -0.602568 | -0.061998 |
| C     | -0.295756 | 0.141585  | -0.393367 |
| H     | -2.655558 | -2.074041 | 0.668287  |
| H     | -0.657754 | -3.351599 | 1.218587  |
| H     | 1.616232  | -2.439880 | 0.768712  |
| H     | -0.161798 | 1.119450  | -0.840047 |
| N     | -2.717619 | 0.359132  | -0.502926 |
| C     | -2.555010 | 1.789606  | -0.727029 |
| H     | -1.909944 | 1.981746  | -1.588362 |
| H     | -3.531600 | 2.222873  | -0.944508 |
| H     | -2.128999 | 2.301879  | 0.149532  |
| C     | -3.991388 | -0.049132 | 0.072777  |
| H     | -3.985850 | -0.008537 | 1.173011  |
| H     | -4.771082 | 0.617100  | -0.297539 |
| H     | -4.250717 | -1.064707 | -0.236428 |
| C     | 2.191660  | -0.030432 | -0.396036 |
| F     | 3.143017  | -0.577269 | 0.446680  |

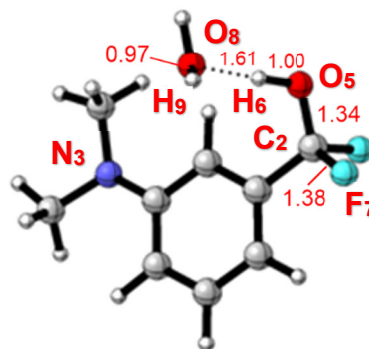



|   |          |           |           |
|---|----------|-----------|-----------|
| F | 2.581415 | -0.459288 | -1.643923 |
| O | 2.306529 | 1.308552  | -0.402613 |
| H | 1.839919 | 1.724891  | 0.382660  |
| O | 1.064484 | 2.458592  | 1.591936  |
| H | 1.127050 | 3.421025  | 1.507502  |
| H | 1.456215 | 2.249127  | 2.452124  |

### TS2

|       | X         | Y         | Z         |
|-------|-----------|-----------|-----------|
| ----- |           |           |           |
| C     | -1.697808 | -0.247726 | -0.148345 |
| C     | -1.905962 | -1.592931 | 0.231187  |
| C     | -0.835931 | -2.472064 | 0.364668  |
| C     | 0.476616  | -2.057362 | 0.147192  |
| C     | 0.689363  | -0.728540 | -0.217408 |
| C     | -0.366878 | 0.167658  | -0.360144 |
| H     | -2.906957 | -1.961371 | 0.420918  |
| H     | -1.035620 | -3.500718 | 0.651712  |
| H     | 1.306710  | -2.745269 | 0.263458  |
| H     | -0.139656 | 1.189353  | -0.641117 |
| N     | -2.758869 | 0.628824  | -0.320826 |
| C     | -2.460480 | 2.054261  | -0.345745 |
| H     | -1.822568 | 2.304745  | -1.197274 |
| H     | -3.394292 | 2.605408  | -0.461394 |
| H     | -1.962492 | 2.393257  | 0.576034  |
| C     | -4.039880 | 0.260553  | 0.266280  |
| H     | -3.971943 | 0.106455  | 1.354244  |
| H     | -4.756469 | 1.058803  | 0.071997  |
| H     | -4.431999 | -0.652083 | -0.190040 |
| C     | 2.076205  | -0.196929 | -0.436021 |
| F     | 2.501549  | 0.147860  | 1.180151  |
| F     | 2.980257  | -1.210715 | -0.606607 |
| O     | 2.308755  | 0.834617  | -1.097340 |
| H     | 2.077067  | 2.106598  | -0.199788 |
| O     | 2.000828  | 2.464606  | 0.756328  |
| H     | 2.670121  | 3.153967  | 0.915969  |
| H     | 2.255779  | 1.589483  | 1.237279  |

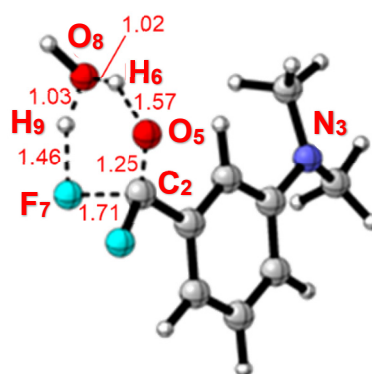

### 5a

|       | X        | Y        | Z         |
|-------|----------|----------|-----------|
| ----- |          |          |           |
| C     | 1.168758 | 0.173984 | -0.108792 |

|   |           |           |           |
|---|-----------|-----------|-----------|
| C | 1.095881  | 1.586286  | -0.047858 |
| C | -0.126248 | 2.246700  | 0.008517  |
| C | -1.328371 | 1.544028  | 0.021353  |
| C | -1.262953 | 0.149300  | -0.016838 |
| C | -0.046732 | -0.535803 | -0.072922 |
| H | 2.002862  | 2.178740  | -0.047931 |
| H | -0.135503 | 3.331745  | 0.049487  |
| H | -2.279384 | 2.061127  | 0.069089  |
| H | -0.066049 | -1.618665 | -0.090481 |
| N | 2.382656  | -0.480673 | -0.211453 |
| C | 2.410800  | -1.909382 | 0.068438  |
| H | 1.777742  | -2.456705 | -0.634853 |
| H | 3.431634  | -2.270535 | -0.058229 |
| H | 2.078889  | -2.140458 | 1.092186  |
| C | 3.588404  | 0.262007  | 0.130249  |
| H | 3.568630  | 0.635862  | 1.165078  |
| H | 4.448414  | -0.397931 | 0.014333  |
| H | 3.729038  | 1.110113  | -0.544623 |
| C | -2.487609 | -0.666850 | 0.010974  |
| F | -3.618225 | 0.077049  | 0.060729  |
| O | -2.592801 | -1.857954 | -0.004896 |

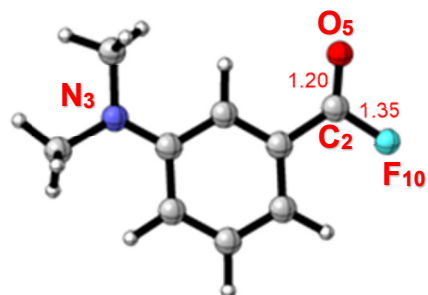

#### IM1-T<sub>1</sub>

|   | X         | Y         | Z         |
|---|-----------|-----------|-----------|
| H | -0.436855 | 1.280621  | 3.386153  |
| O | -0.170521 | 0.964566  | 2.512706  |
| H | -0.963021 | 0.551291  | 2.140680  |
| C | -0.969972 | 0.111905  | -0.575827 |
| C | -0.897828 | 1.558658  | -0.785802 |
| C | 0.311385  | 2.205434  | -0.826645 |
| C | 1.528586  | 1.516952  | -0.619348 |
| C | 0.236828  | -0.590870 | -0.309042 |
| C | 1.468311  | 0.078662  | -0.341487 |
| C | -2.236330 | -0.486653 | -0.206255 |
| H | -1.817499 | 2.118558  | -0.931697 |
| H | 0.339959  | 3.271069  | -1.034786 |
| H | 2.476167  | 2.014566  | -0.768613 |
| H | 0.195877  | -1.637160 | -0.028811 |
| N | 2.627587  | -0.588899 | -0.131262 |
| F | -2.284142 | -1.830211 | -0.381272 |
| F | -3.307434 | 0.040068  | -0.852837 |
| F | -2.594691 | -0.335909 | 1.150391  |

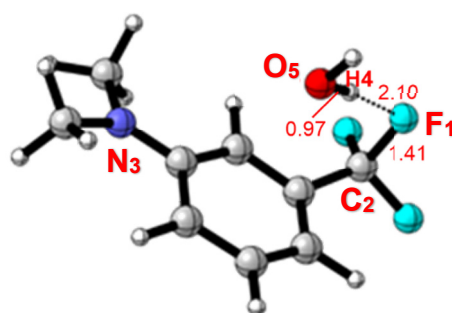

|   |          |           |           |
|---|----------|-----------|-----------|
| C | 3.901441 | 0.071034  | 0.142932  |
| C | 2.671495 | -2.045763 | -0.084892 |
| H | 2.383914 | -2.400740 | 0.911683  |
| H | 3.694308 | -2.362136 | -0.291542 |
| H | 3.750296 | 1.079088  | 0.519139  |
| H | 4.514783 | 0.090030  | -0.764163 |
| H | 4.422247 | -0.511647 | 0.905694  |
| H | 2.003805 | -2.469463 | -0.834881 |

**TS3-T<sub>1</sub>**

|       | X         | Y         | Z         |
|-------|-----------|-----------|-----------|
| ----- |           |           |           |
| H     | -0.926394 | 0.976376  | 3.435427  |
| O     | -0.645840 | 0.792984  | 2.529812  |
| H     | -1.409676 | 0.357918  | 2.101364  |
| C     | -0.905870 | 0.152001  | -0.578587 |
| C     | -0.827820 | 1.589290  | -0.764765 |
| C     | 0.393297  | 2.236527  | -0.727932 |
| C     | 1.584358  | 1.550681  | -0.483953 |
| C     | 0.293812  | -0.564617 | -0.330300 |
| C     | 1.529353  | 0.117268  | -0.284874 |
| C     | -2.145674 | -0.476895 | -0.422947 |
| H     | -1.737915 | 2.153520  | -0.941385 |
| H     | 0.429061  | 3.308187  | -0.898701 |
| H     | 2.531365  | 2.070849  | -0.510910 |
| H     | 0.247113  | -1.625783 | -0.120282 |
| N     | 2.672885  | -0.563792 | -0.059735 |
| F     | -2.213684 | -1.802794 | -0.570416 |
| F     | -3.226174 | 0.095973  | -0.961142 |
| F     | -2.696180 | -0.436771 | 1.200191  |
| C     | 3.942205  | 0.098462  | 0.236012  |
| C     | 2.721110  | -2.023995 | -0.077065 |
| H     | 2.433306  | -2.416411 | 0.904563  |
| H     | 3.745843  | -2.324432 | -0.294581 |
| H     | 3.779388  | 1.038492  | 0.758165  |
| H     | 4.495638  | 0.269715  | -0.693757 |
| H     | 4.524777  | -0.565928 | 0.874874  |
| H     | 2.059727  | -2.419835 | -0.846352 |

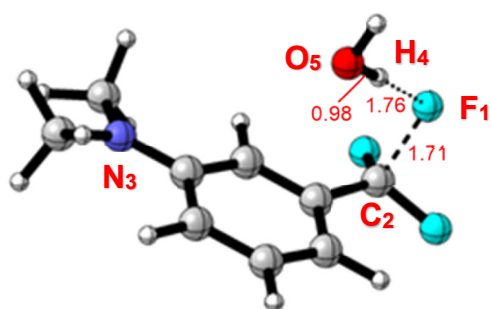

**IM5-T<sub>1</sub>**

|   | X         | Y         | Z         |
|---|-----------|-----------|-----------|
| H | -0.443563 | 0.929705  | 3.340179  |
| O | -0.404544 | 0.634211  | 2.422474  |
| H | -1.345149 | 0.248014  | 2.200427  |
| C | -0.917237 | 0.158454  | -0.709723 |
| C | -0.859928 | 1.582873  | -0.839974 |
| C | 0.360212  | 2.242373  | -0.719859 |
| C | 1.534461  | 1.557446  | -0.461881 |
| C | 0.267281  | -0.565645 | -0.468812 |
| C | 1.500945  | 0.128463  | -0.336131 |
| C | -2.131238 | -0.504803 | -0.758609 |
| H | -1.770112 | 2.141638  | -1.027342 |
| H | 0.390305  | 3.321084  | -0.832058 |
| H | 2.472298  | 2.092609  | -0.399588 |
| H | 0.218160  | -1.637441 | -0.327160 |
| N | 2.629412  | -0.560500 | -0.082251 |
| F | -2.264095 | -1.806847 | -0.629348 |
| F | -3.285434 | 0.091046  | -0.961825 |
| F | -2.591897 | -0.279805 | 1.872555  |
| C | 3.877597  | 0.104214  | 0.291095  |
| C | 2.681169  | -2.020984 | -0.153336 |
| H | 2.322354  | -2.445474 | 0.790485  |
| H | 3.719001  | -2.313567 | -0.305956 |
| H | 3.677823  | 0.992160  | 0.887560  |
| H | 4.434939  | 0.371118  | -0.613530 |
| H | 4.467724  | -0.598387 | 0.878734  |
| H | 2.079955  | -2.385537 | -0.984835 |

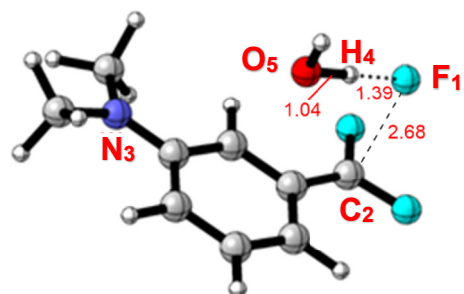**TS4-T<sub>1</sub>**

|   | X         | Y         | Z         |
|---|-----------|-----------|-----------|
| H | -3.716676 | -0.829485 | 0.700629  |
| O | -2.820314 | -0.544260 | 0.939060  |
| H | -2.122032 | -1.565319 | 1.240926  |
| C | -0.765016 | 0.677573  | -0.274293 |
| C | -0.568733 | 1.978427  | 0.332364  |
| C | 0.698351  | 2.397467  | 0.701194  |
| C | 1.821886  | 1.594050  | 0.517492  |
| C | 0.357383  | -0.174443 | -0.425357 |
| C | 1.643274  | 0.274453  | -0.046638 |
| C | -2.053654 | 0.212861  | -0.548988 |

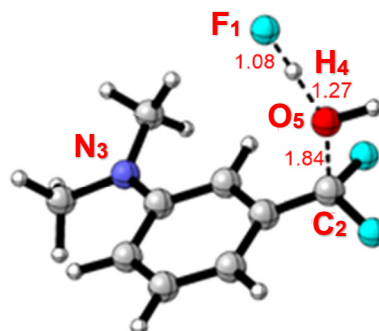

|   |           |           |           |
|---|-----------|-----------|-----------|
| H | -1.423236 | 2.628086  | 0.491670  |
| H | 0.820453  | 3.377058  | 1.153046  |
| H | 2.793314  | 1.926478  | 0.855700  |
| H | 0.227772  | -1.151164 | -0.873984 |
| N | 2.712290  | -0.535123 | -0.200009 |
| F | -2.199910 | -0.830386 | -1.376027 |
| F | -3.027140 | 1.105565  | -0.770159 |
| F | -1.506462 | -2.410188 | 1.498963  |
| C | 4.086270  | -0.063335 | -0.033294 |
| C | 2.562379  | -1.946377 | -0.548962 |
| H | 1.716770  | -2.380565 | -0.016220 |
| H | 3.475375  | -2.466199 | -0.261882 |
| H | 4.181678  | 0.969851  | -0.360429 |
| H | 4.732737  | -0.692352 | -0.644848 |
| H | 4.384401  | -0.157136 | 1.016701  |
| H | 2.414689  | -2.048288 | -1.629821 |

#### IM6-T<sub>1</sub>

|   | X         | Y         | Z         |
|---|-----------|-----------|-----------|
| H | -3.624587 | -0.776859 | 0.544383  |
| O | -2.720502 | -0.438625 | 0.683457  |
| H | -1.820604 | -1.338326 | 1.626598  |
| C | -0.817127 | 0.574112  | -0.356510 |
| C | -0.707603 | 1.828583  | 0.393872  |
| C | 0.518548  | 2.329457  | 0.749891  |
| C | 1.716847  | 1.644395  | 0.434106  |
| C | 0.344230  | -0.228442 | -0.477053 |
| C | 1.597625  | 0.285819  | -0.121758 |
| C | -2.146974 | -0.020753 | -0.515587 |
| H | -1.612757 | 2.370246  | 0.656704  |
| H | 0.577983  | 3.272460  | 1.285735  |
| H | 2.667760  | 2.017023  | 0.786830  |
| H | 0.265253  | -1.223317 | -0.899651 |
| N | 2.719904  | -0.466618 | -0.237659 |
| F | -2.135163 | -1.094044 | -1.369666 |
| F | -3.056259 | 0.861325  | -1.074342 |
| F | -1.276091 | -1.869438 | 2.211821  |
| C | 4.074280  | 0.073717  | -0.162678 |
| C | 2.640746  | -1.894073 | -0.522428 |
| H | 1.845154  | -2.352061 | 0.067195  |
| H | 3.594497  | -2.351409 | -0.259401 |
| H | 4.083118  | 1.144279  | -0.347957 |

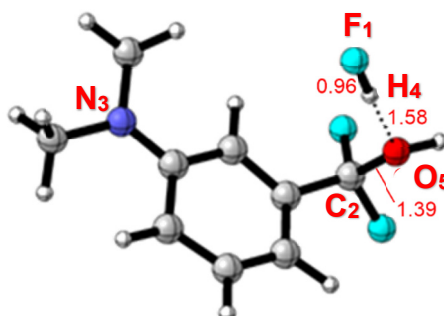

|   |          |           |           |
|---|----------|-----------|-----------|
| H | 4.672809 | -0.417842 | -0.933271 |
| H | 4.513070 | -0.147735 | 0.816235  |
| H | 2.447174 | -2.058620 | -1.588880 |

### H<sub>2</sub>O

|   | X        | Y         | Z         |
|---|----------|-----------|-----------|
| O | 0.000000 | 0.000000  | 0.117581  |
| H | 0.000000 | 0.766463  | -0.470323 |
| H | 0.000000 | -0.766463 | -0.470323 |

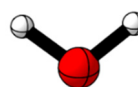

### HF

|   | X        | Y        | Z         |
|---|----------|----------|-----------|
| F | 0.000000 | 0.000000 | 0.093149  |
| H | 0.000000 | 0.000000 | -0.838341 |

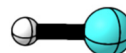

### 1a-T<sub>1</sub>

|   | X         | Y         | Z         |
|---|-----------|-----------|-----------|
| C | -0.993683 | 0.273620  | -0.189443 |
| C | -0.918060 | 1.732076  | -0.087446 |
| C | 0.294210  | 2.372391  | -0.063447 |
| C | 1.513379  | 1.653707  | -0.082385 |
| C | 0.211039  | -0.470387 | -0.085748 |
| C | 1.448668  | 0.187162  | -0.052646 |
| C | -2.272154 | -0.385485 | 0.008352  |
| H | -1.837421 | 2.310357  | -0.055208 |
| H | 0.325331  | 3.457951  | -0.044411 |
| H | 2.455681  | 2.167581  | -0.205760 |
| H | 0.167814  | -1.550233 | -0.006249 |
| N | 2.605865  | -0.516922 | -0.014500 |
| F | -2.296596 | -1.668584 | -0.434893 |
| F | -3.313990 | 0.257582  | -0.590057 |
| F | -2.697643 | -0.494155 | 1.332988  |
| C | 3.907592  | 0.064351  | 0.300031  |
| C | 2.612961  | -1.962887 | -0.206504 |
| H | 2.265446  | -2.467338 | 0.702519  |
| H | 3.635100  | -2.275886 | -0.417878 |
| H | 3.806842  | 1.052862  | 0.737501  |
| H | 4.521042  | 0.106209  | -0.605874 |

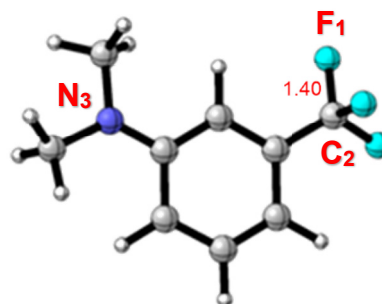

|   |          |           |           |
|---|----------|-----------|-----------|
| H | 4.399818 | -0.589912 | 1.024588  |
| H | 1.969639 | -2.234010 | -1.044647 |

## 8. Supplementary reference

1. H. Kuhn, S. Braslavsky and R. Schmidt, *Pure. Appl. Chem.*, 1989, **61**, 187.
2. J. G. Calvert, J. N. Pitts, *Photochemistry*, Wiley Press. 1966.
3. E. Stadler, A. Eibel, D. Fast, H. Freißmuth, C. Holly, M. Wiech, N. Moszner and G. Gescheidt, *Photochem. Photobiol. Sci.*, 2018, **17**, 660.
4. B. T. Ginn, B. Steinbock, M. Kahveci and O. Steinbock, *J. Phys. Chem. A.*, 2004, **108**, 1325.
5. J. Li, H. Kong, L. Huang, B. Cheng, K. Qin, M. Zheng, Z. Yan and Y. Zhang, *J. Am. Chem. Soc.*, 2018, **140**, 14542.
6. Li. Z, Hao. P, Li. L, Tan. C. Y, Cheng. X, Chen. G. Y, Sze. S. K, Shen. H. M, Yao. S. Q, *Angew. Chem. Int. Ed.*, 2013, **125**, 8713.
7. Frisch, M. J. T., G. W.; Schlegel, H. B.; Scuseria, G. E.; Robb, M. A.; Cheeseman, J. R.; Scalmani, G.; Barone, V.; Mennucci, B.; Petersson, G. A.; Nakatsuji, H.; Caricato, M.; Li, X.; Hratchian, H. P.; Izmaylov, A. F.; Bloino, J.; Zheng, G.; Sonnenberg, J. L.; Hada, M.; Ehara, M.; Toyota, K.; Fukuda, R.; Hasegawa, J.; Ishida, M.; Nakajima, T.; Honda, Y.; Kitao, O.; Nakai, H.; Vreven, T.; Montgomery, J. A.; Peralta, J. J. E.; Ogliaro, F.; Bearpark, M.; Heyd, J. J.; Brothers, E.; Kudin, K. N.; taroverov, V. N.; Keith, T.; Kobayashi, R.; Normand, J.; Raghavachari, K.; Rendell, A.; Burant, J. C.; Iyengar, S. S.; Tomasi, J.; Cossi, M.; Rega, N.; Millam, J. M.; Klene, M.; Knox, J. E.; Cross, J. B.; Bakken, V.; Adamo, C.; Jaramillo, J.; Gomperts, R.; Stratmann, R. E.; Yazyev, O.; Austin, A. J.; Cammi, R.; Pomelli, C.; Ochterski, J. W.; Martin, R. L.; Morokuma, K.; Zakrzewski, V. G.; Voth, G. A.; Salvador, P.; Dannenberg, J. J.; Dapprich, S.; Daniels, A. D.; Farkas, O.; Foresman, J. B.; Ortiz, J. V.; Cioslowski, J.; Fox, D. J., Gaussian 09 (Revision D.01) I. Gaussian. *Wallingford*, **2013**, CT.
8. Y. Zhao and D. G. Truhlar, *Theor. Chem. Acc.*, 2008, **120**, 215.
9. M. J. Frisch, J. A. Pople and J. S. Binkley, *J. Chem. Phys.*, 1984, **80**, 3265.
10. T. Clark, J. Chandrasekhar, G. W. Spitznagel and P. V. R. Schleyer, *J. Comput. Chem.*, 1983, **4**, 294.
11. A. V. Marenich, C. J. Cramer and D. G. Truhlar, *J. Phys. Chem. B.*, 2009, **113**, 6378.
12. J. Zheng, X. Xu and D. G. Truhlar, *Theor. Chem. Acc.*, 2011, **128**, 295.
13. I. Alecu, J. Zheng, Y. Zhao and D. G. Truhlar, *J. Chem. Theory. Comput.*, 2010, **6**, 2872.
14. C. Gonzalez and H. B. Schlegel, *J. Chem. Phys.*, 1989, **90**, 2154.
15. N. Marceau, Université de Sh *CYLview20*; Université de Sherbrooke, 2020. <http://www.cylview.org>



## 9. NMR spectra

$^1\text{H}$  NMR (400 MHz,  $\text{CDCl}_3$ )

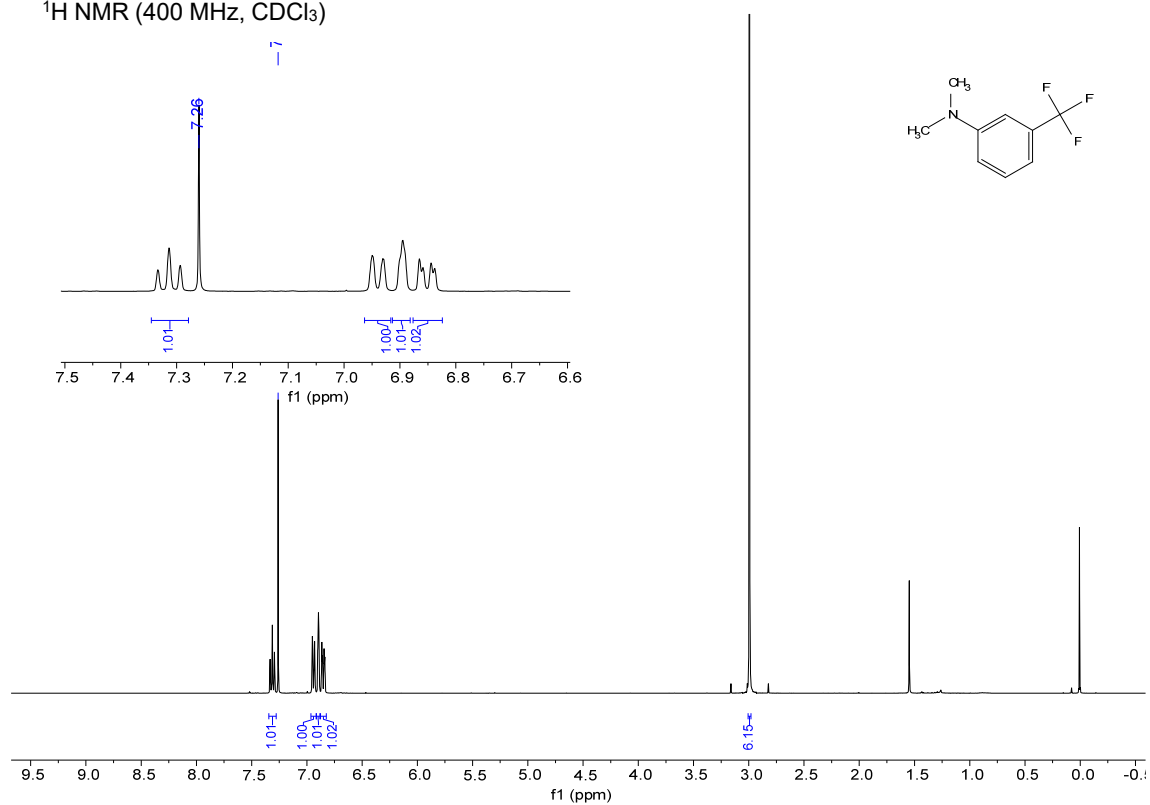

$^1\text{H}$  NMR spectrum of **1a**

$^{13}\text{C}$  NMR (101 MHz,  $\text{CDCl}_3$ )

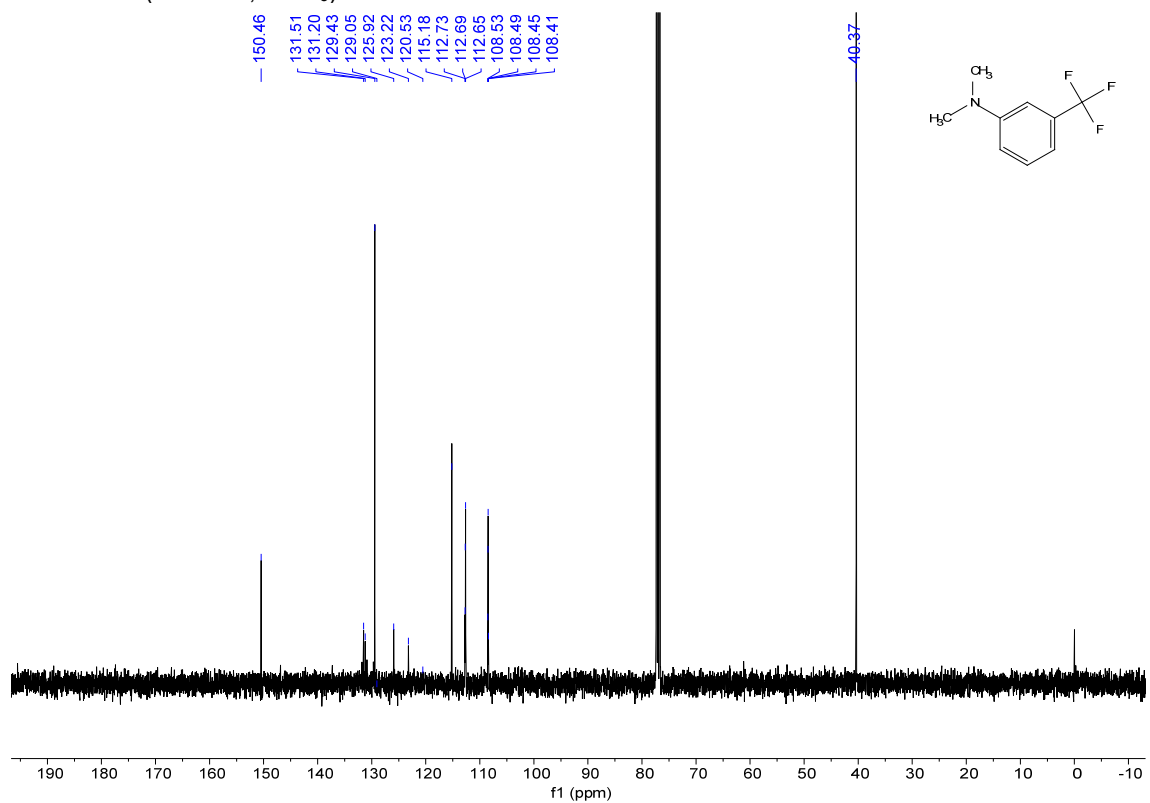

$^{13}\text{C}$  NMR spectrum of **1a**

$^{19}\text{F}$  NMR (376 MHz,  $\text{CDCl}_3$ )

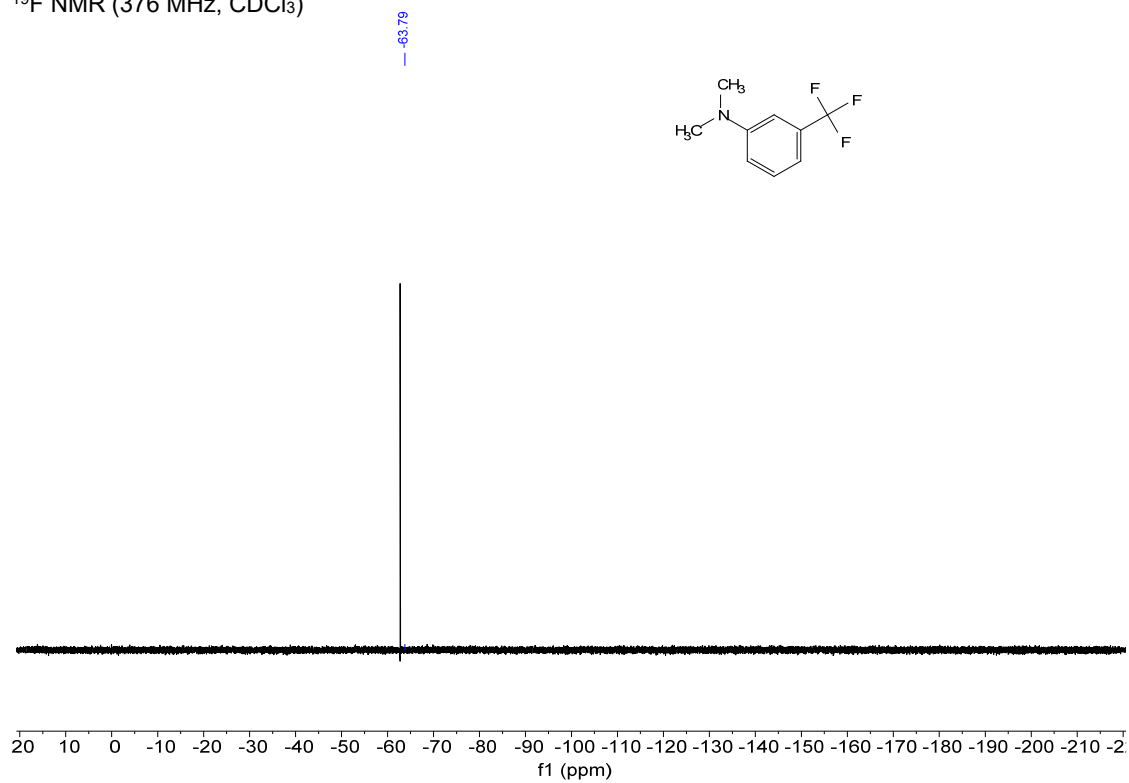

$^{19}\text{F}$  NMR spectrum of **1a**

$^1\text{H}$  NMR (400 MHz,  $\text{CDCl}_3$ )

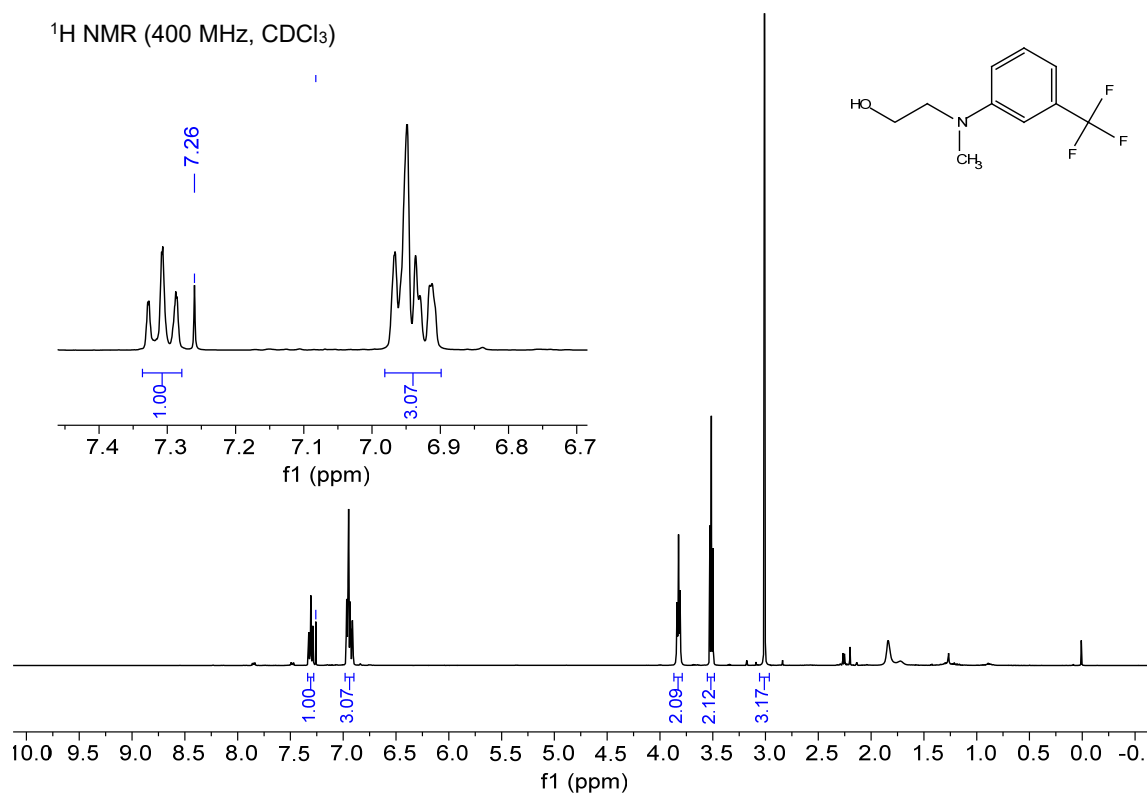

$^1\text{H}$  NMR spectrum of **1b**

$^{13}\text{C}$  NMR (101 MHz,  $\text{CDCl}_3$ )

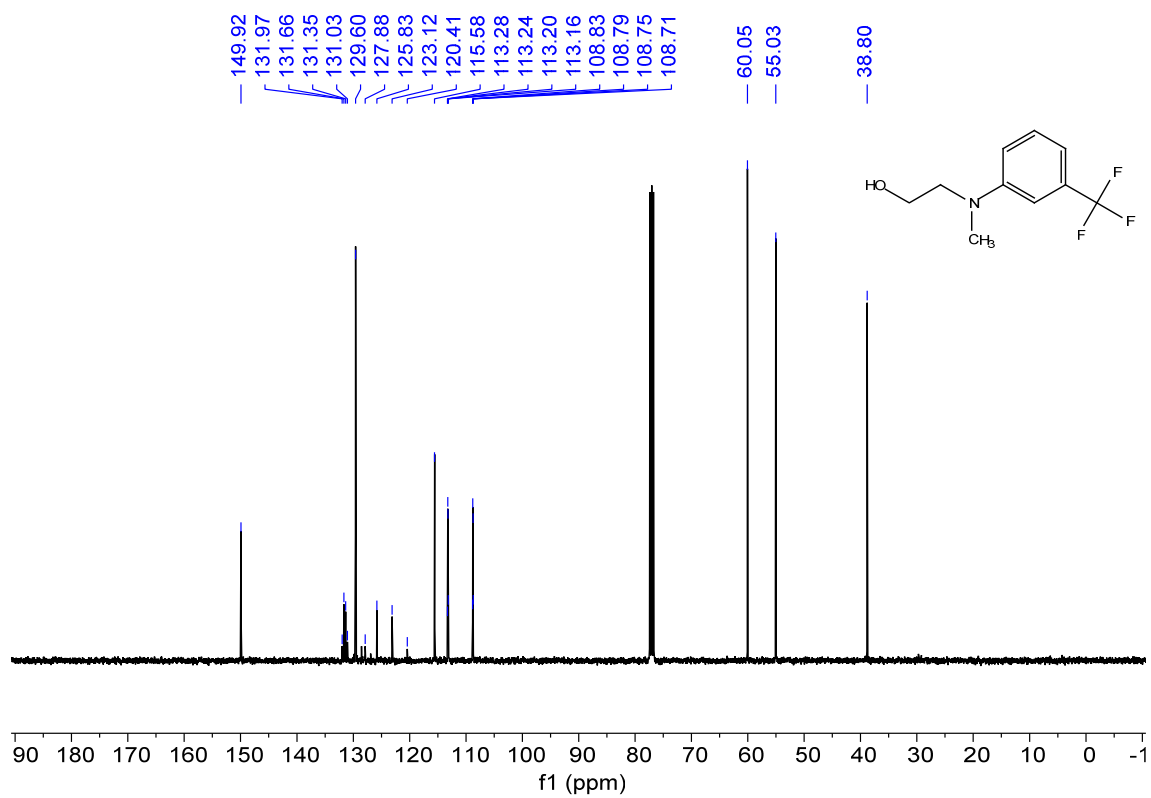

$^{13}\text{C}$  NMR spectrum of **1b**

$^{19}\text{F}$  NMR (376 MHz,  $\text{CDCl}_3$ )

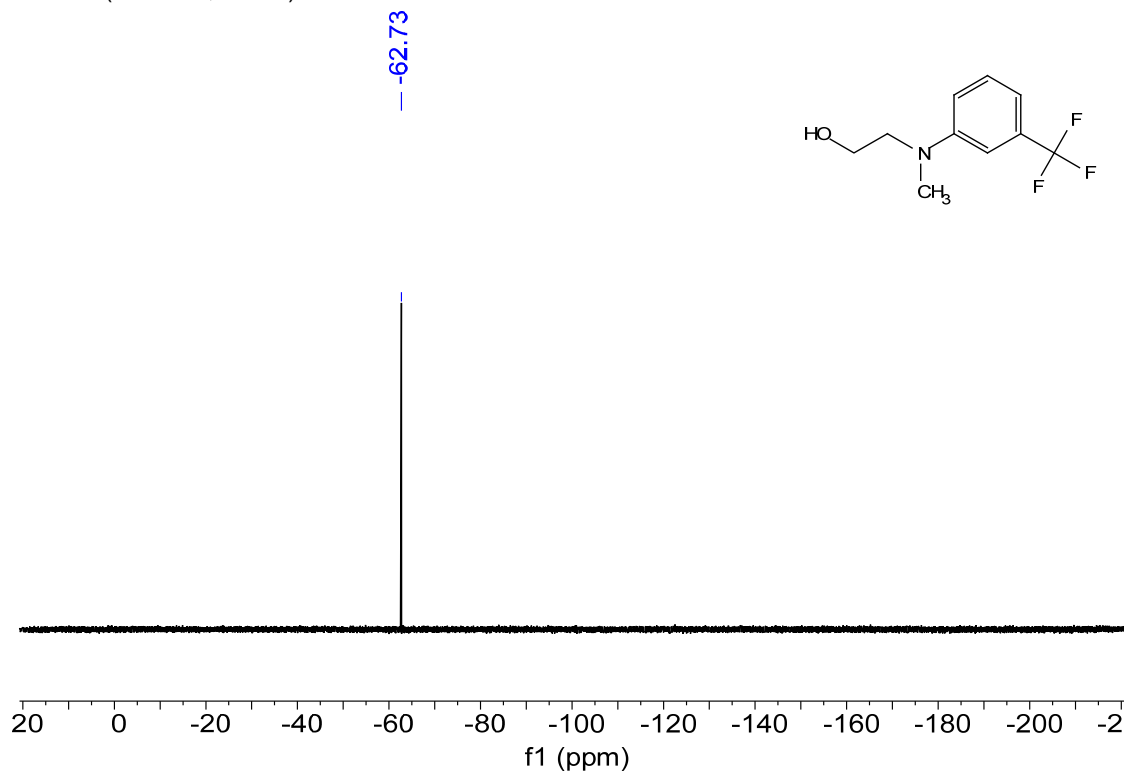

$^{19}\text{F}$  NMR spectrum of **1b**

<sup>1</sup>H NMR (400 MHz, CDCl<sub>3</sub>)

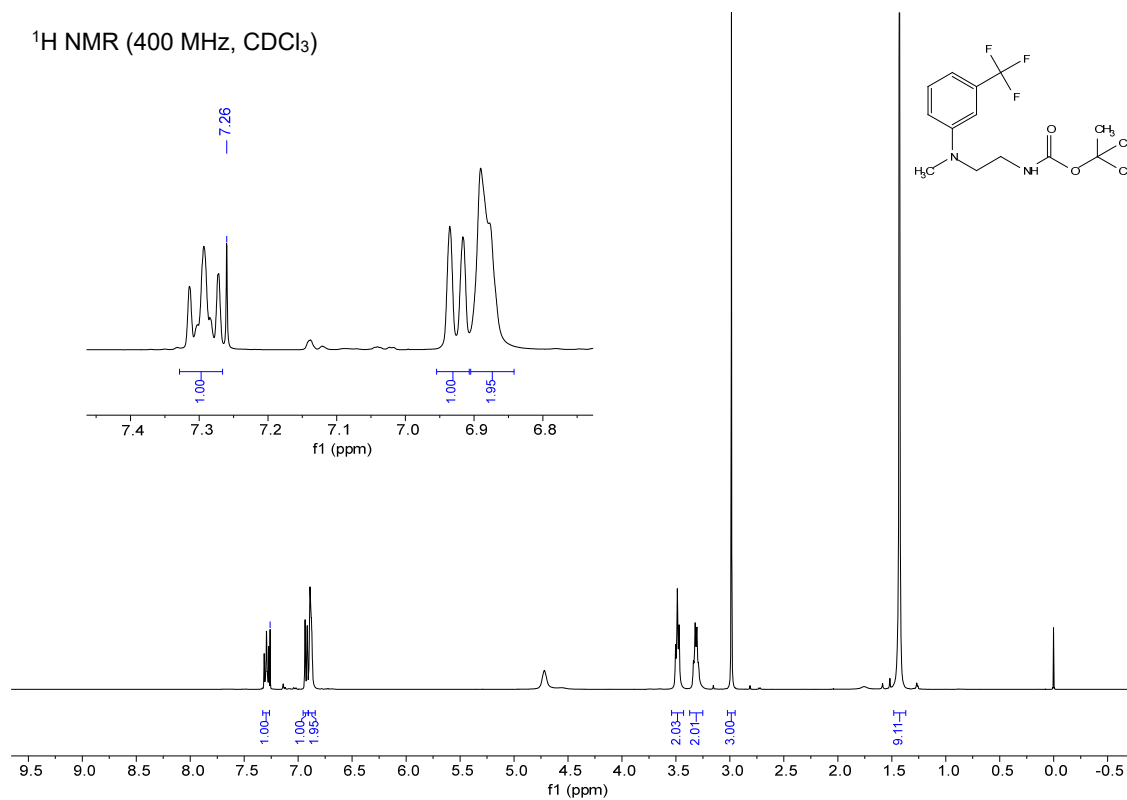

<sup>1</sup>H NMR spectrum of **1c**

<sup>13</sup>C NMR (101 MHz, CDCl<sub>3</sub>)

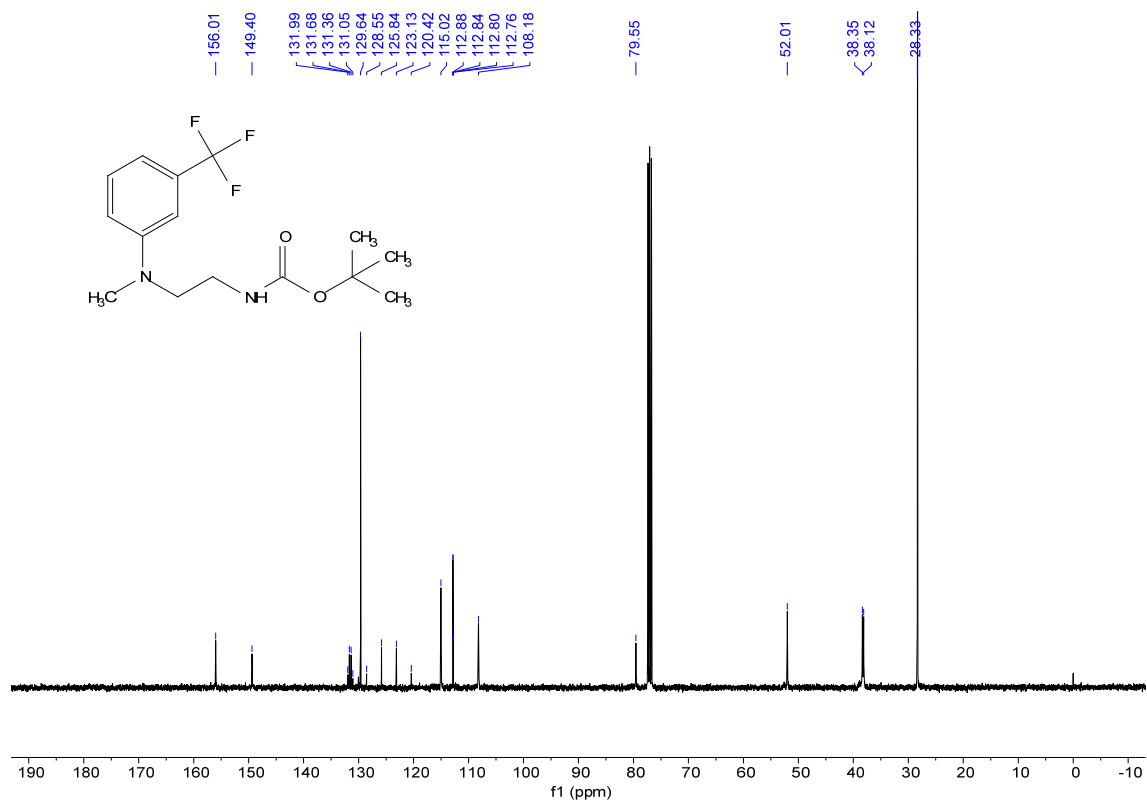

<sup>13</sup>C NMR spectrum of **1c**

$^{19}\text{F}$  NMR (376 MHz,  $\text{DMSO-}d_6$ )

— 61.08

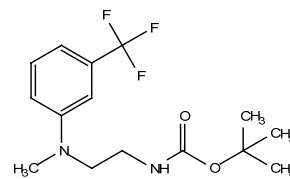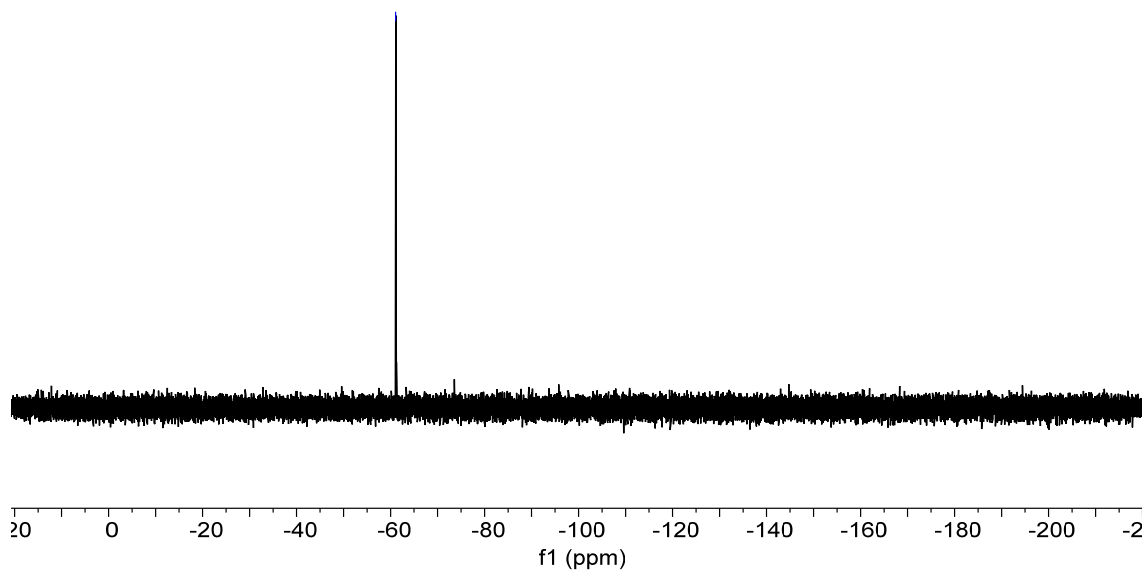

$^{19}\text{F}$  NMR spectrum of **1c**

$^1\text{H}$  NMR (400 MHz,  $\text{CDCl}_3$ )

— 7.26

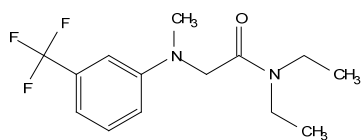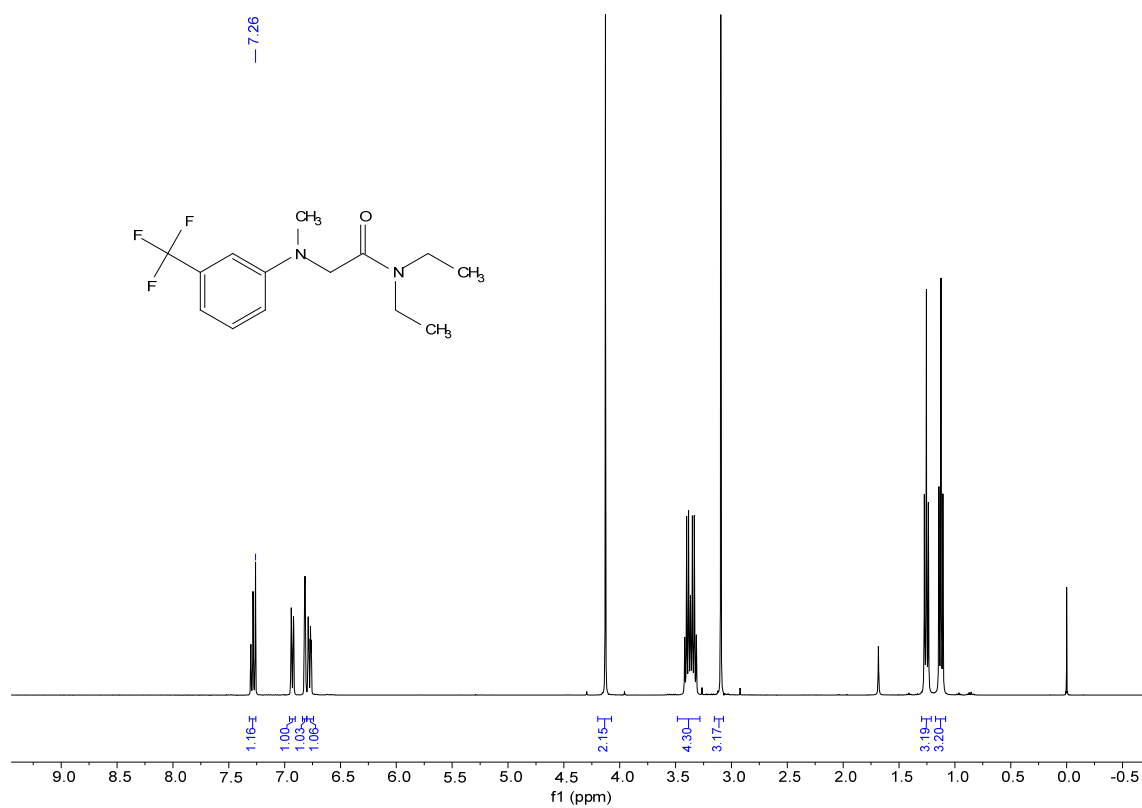

$^1\text{H}$  NMR spectrum of **1d**

<sup>13</sup>C NMR (101 MHz, CDCl<sub>3</sub>)

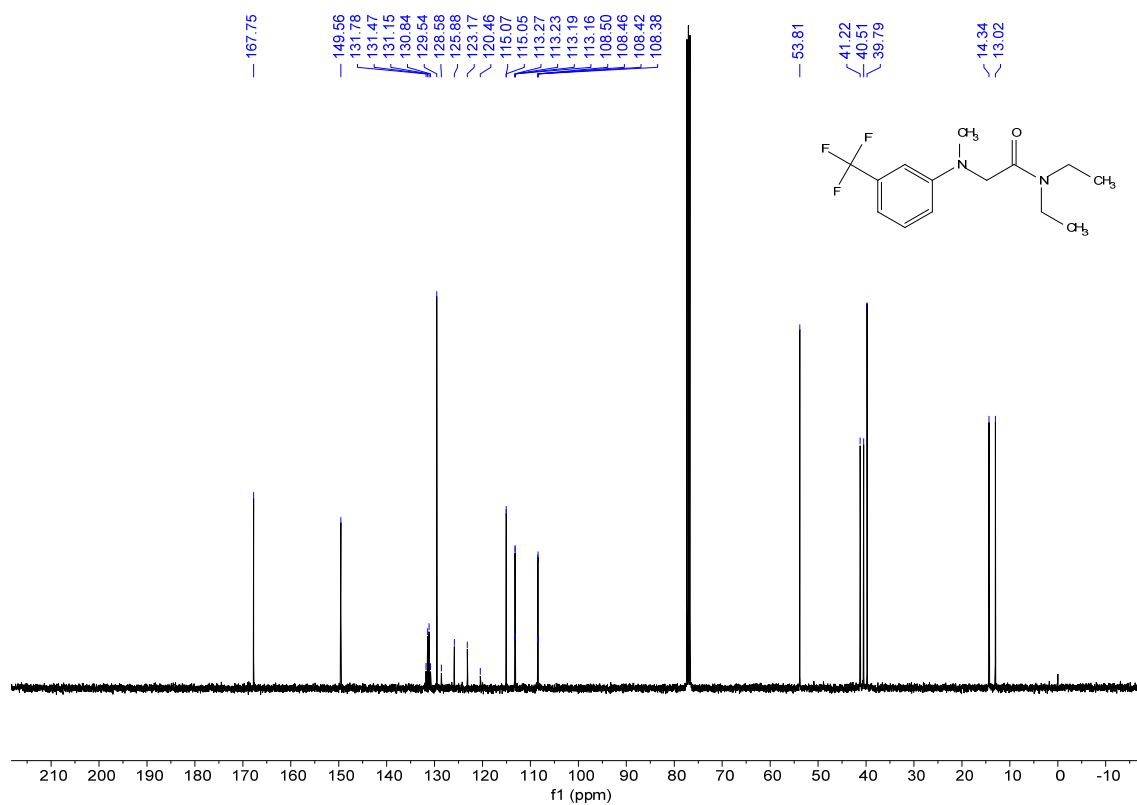

<sup>13</sup>C NMR spectrum of **1d**

<sup>19</sup>F NMR (376 MHz, CDCl<sub>3</sub>)

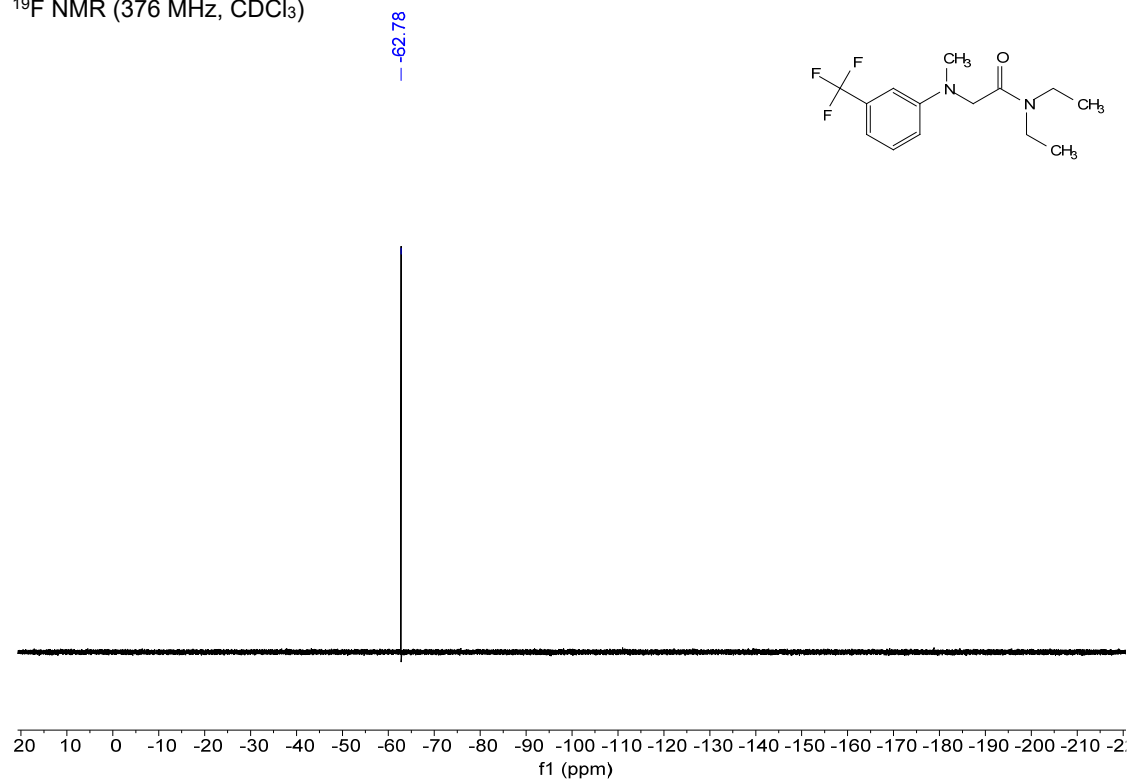

<sup>19</sup>F NMR spectrum of **1d**

$^1\text{H}$  NMR (400 MHz,  $\text{CDCl}_3$ )

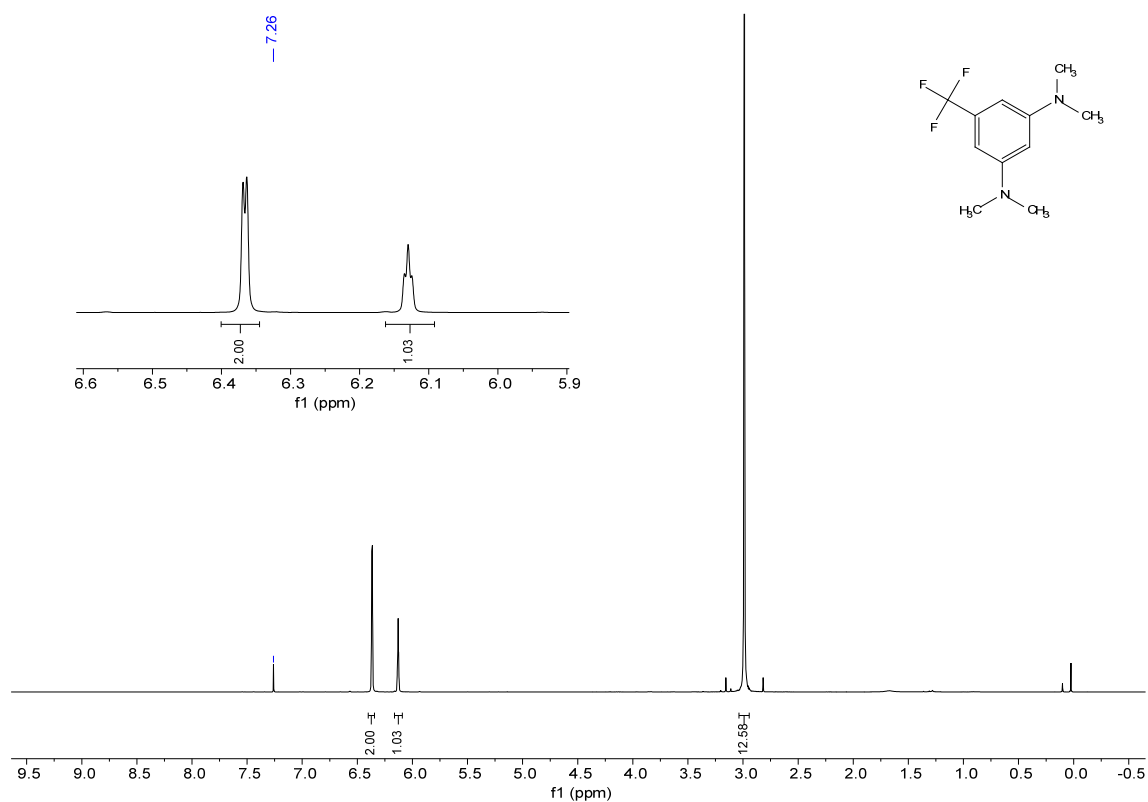

$^1\text{H}$  NMR spectrum of **1e**

$^{13}\text{C}$  NMR (101 MHz,  $\text{CDCl}_3$ )

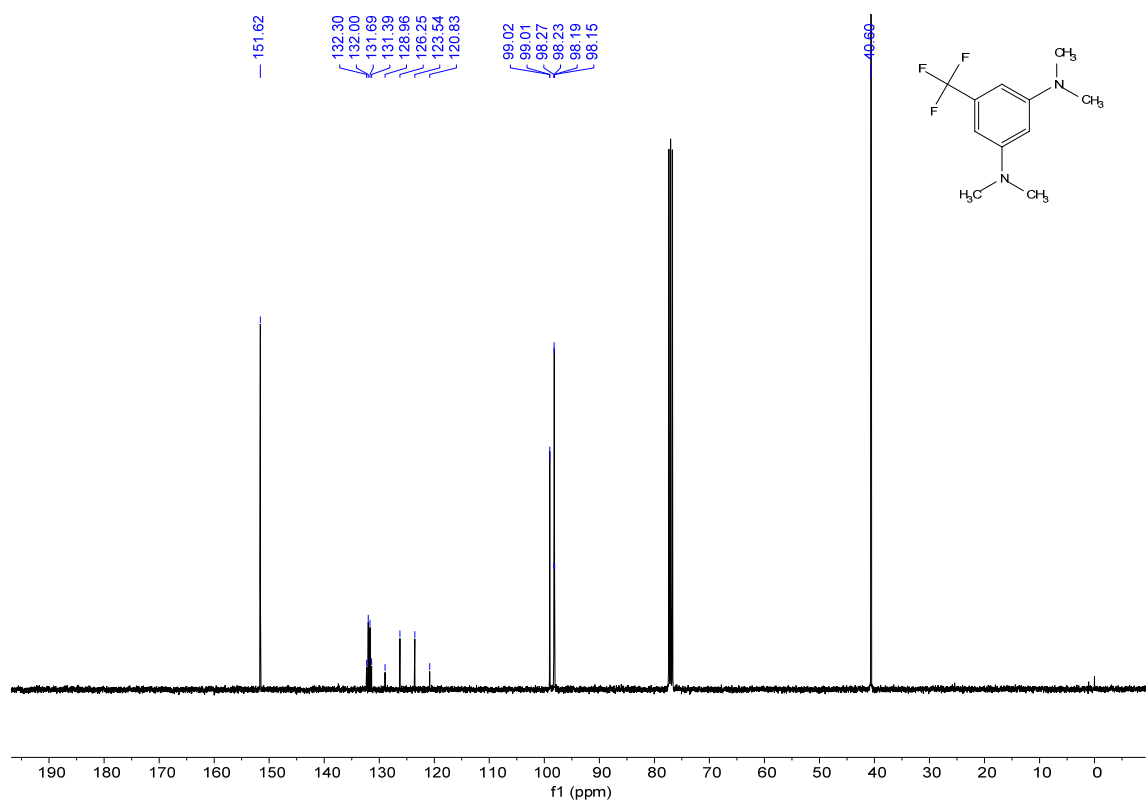

$^{13}\text{C}$  NMR spectrum of **1e**

$^{19}\text{F}$  NMR (376 MHz,  $\text{CDCl}_3$ )

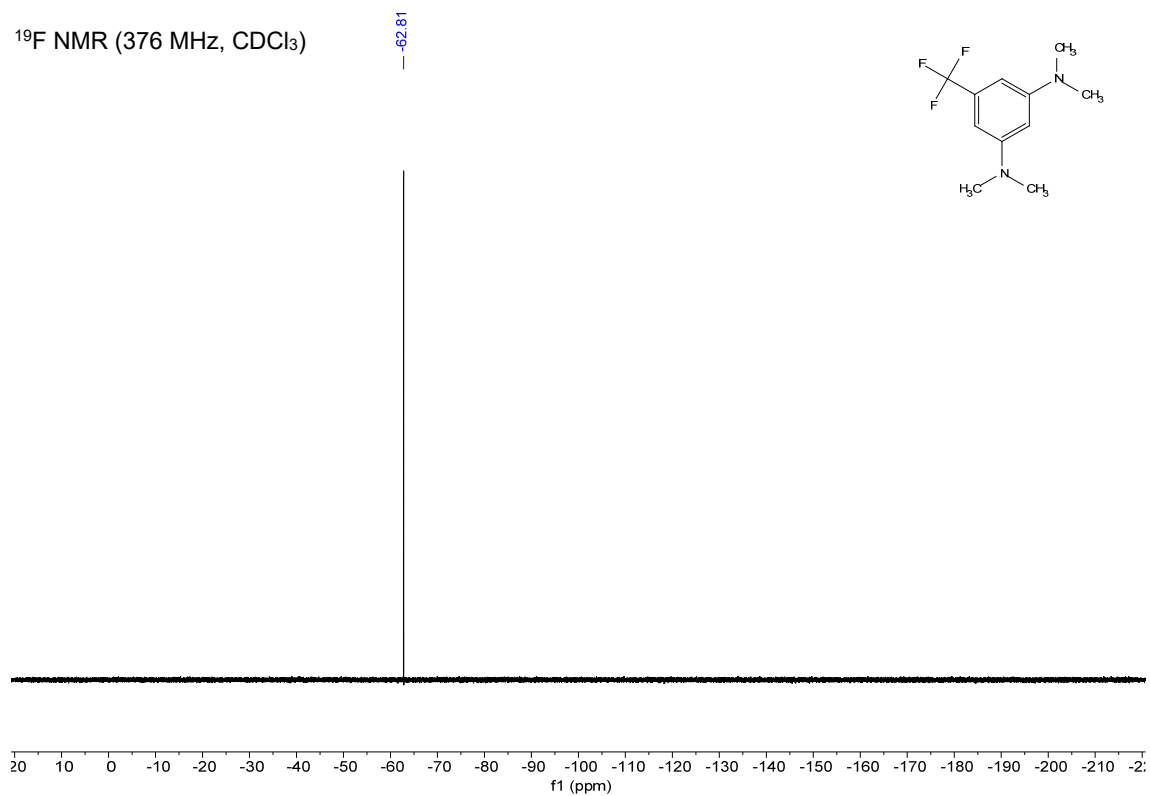

$^{19}\text{F}$  NMR spectrum of **1e**

$^1\text{H}$  NMR (400 MHz,  $\text{CDCl}_3$ )

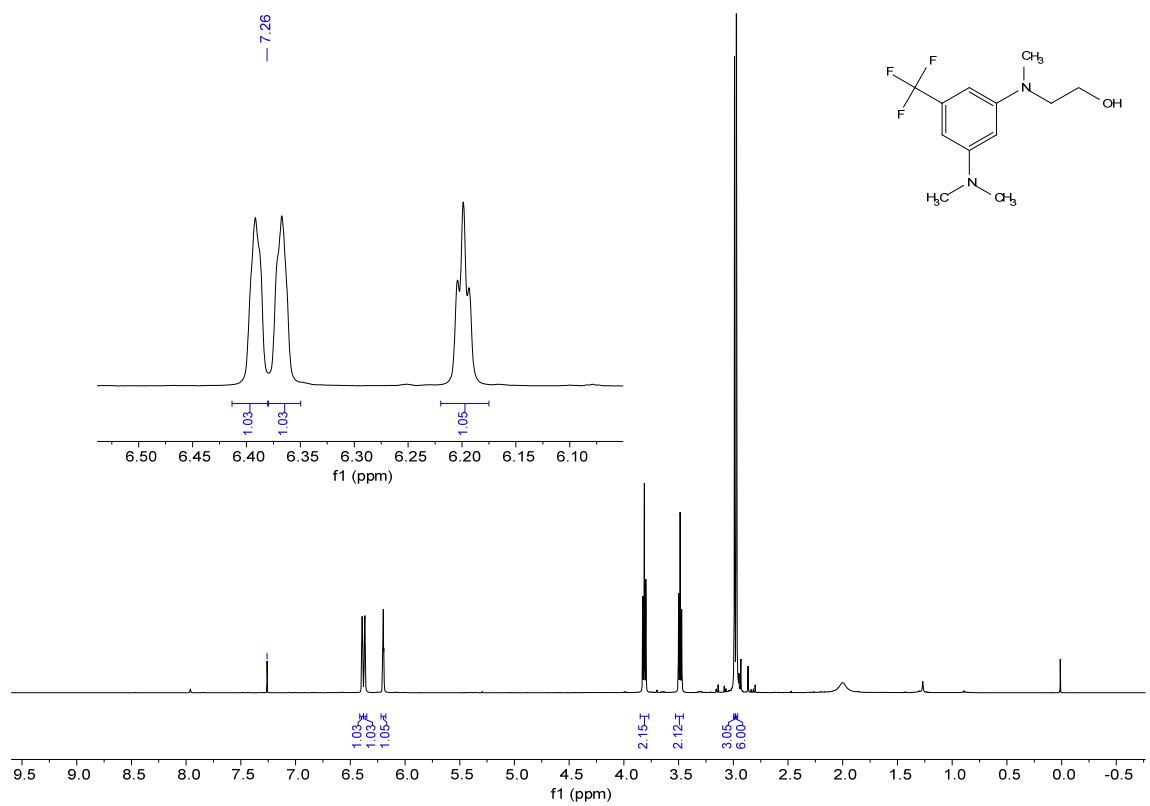

$^1\text{H}$  NMR spectrum of **1f**



<sup>13</sup>C NMR (101 MHz, CDCl<sub>3</sub>)

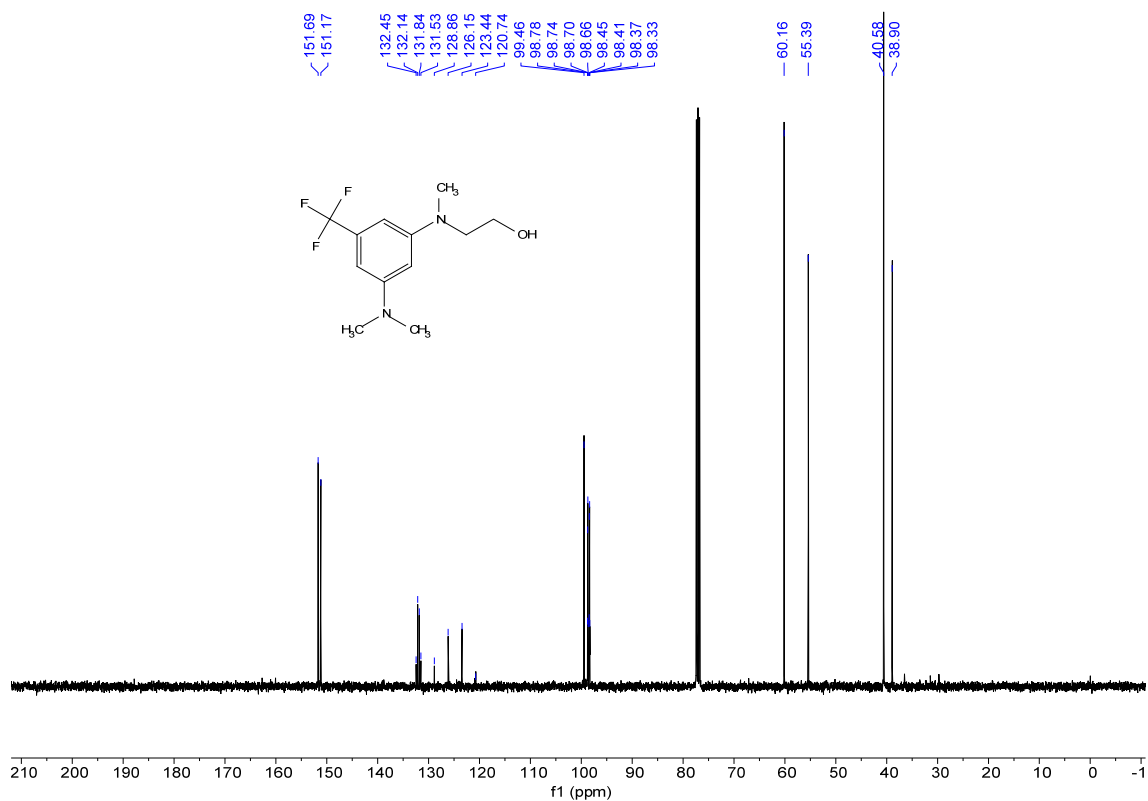

<sup>13</sup>C NMR spectrum of **1f**

<sup>19</sup>F NMR (376 MHz, CDCl<sub>3</sub>)

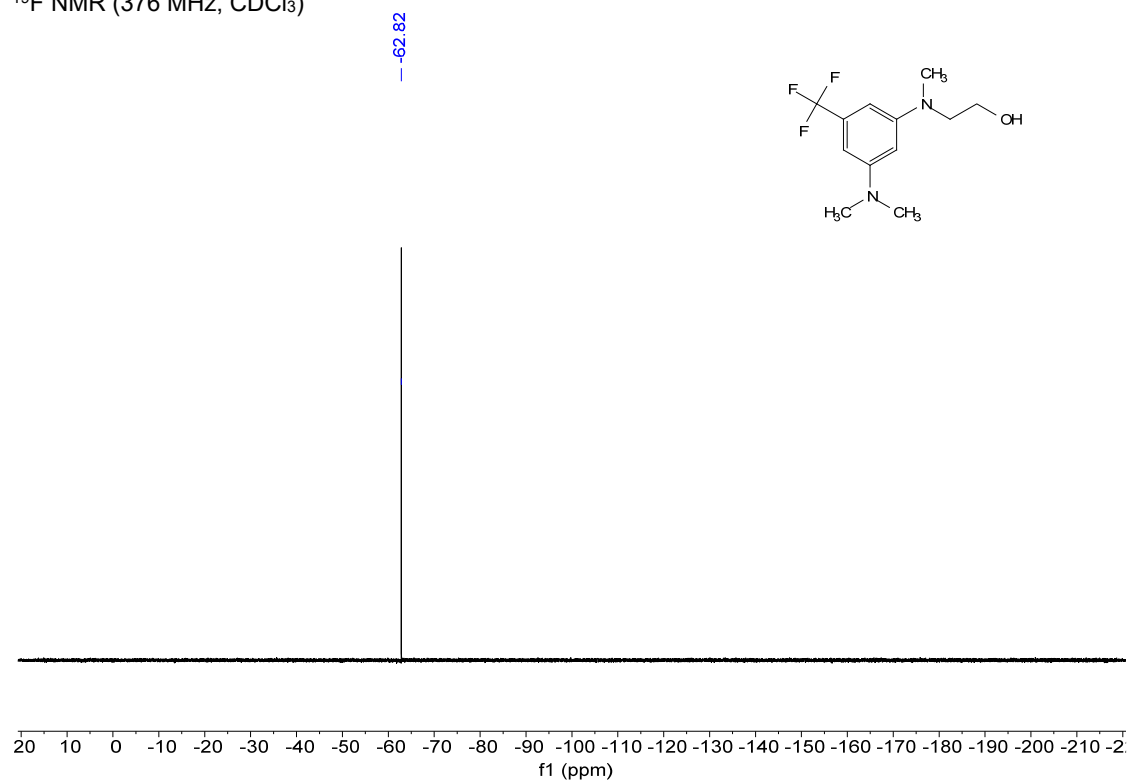

<sup>19</sup>F NMR spectrum of **1f**

$^1\text{H}$  NMR (400 MHz,  $\text{DMSO-}d_6$ )

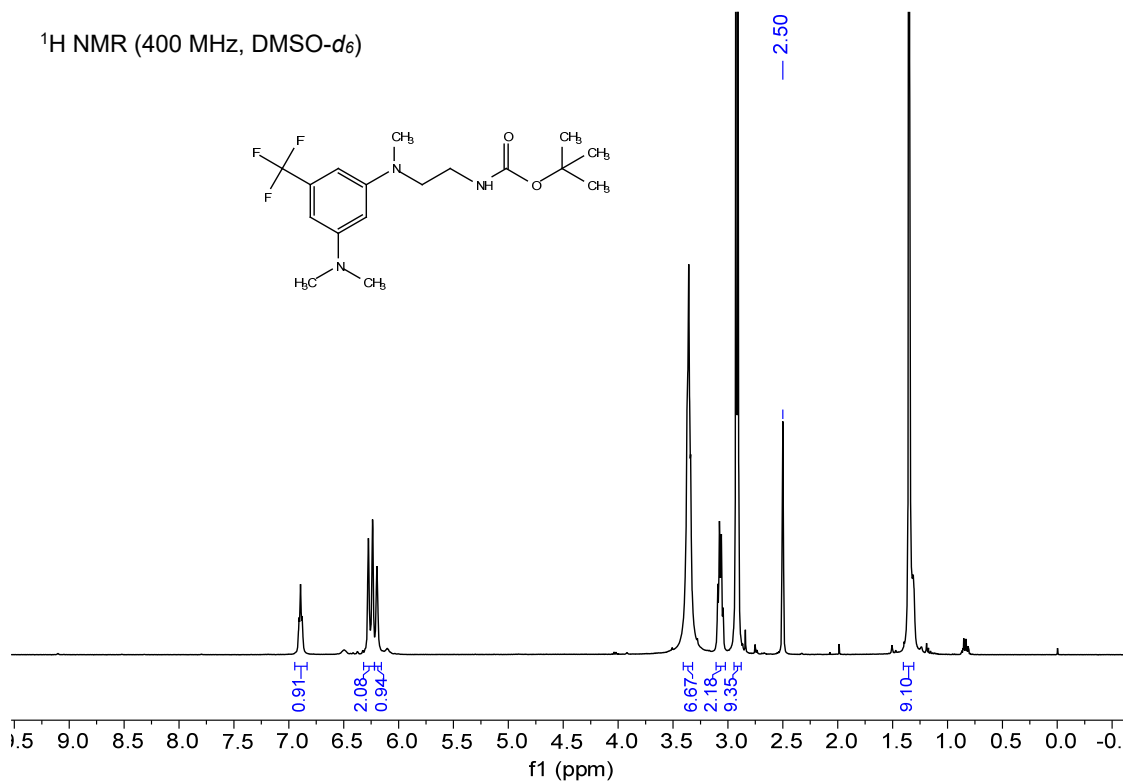

$^1\text{H}$  NMR spectrum of **1g**

$^{13}\text{C}$  NMR (101 MHz,  $\text{CDCl}_3$ )

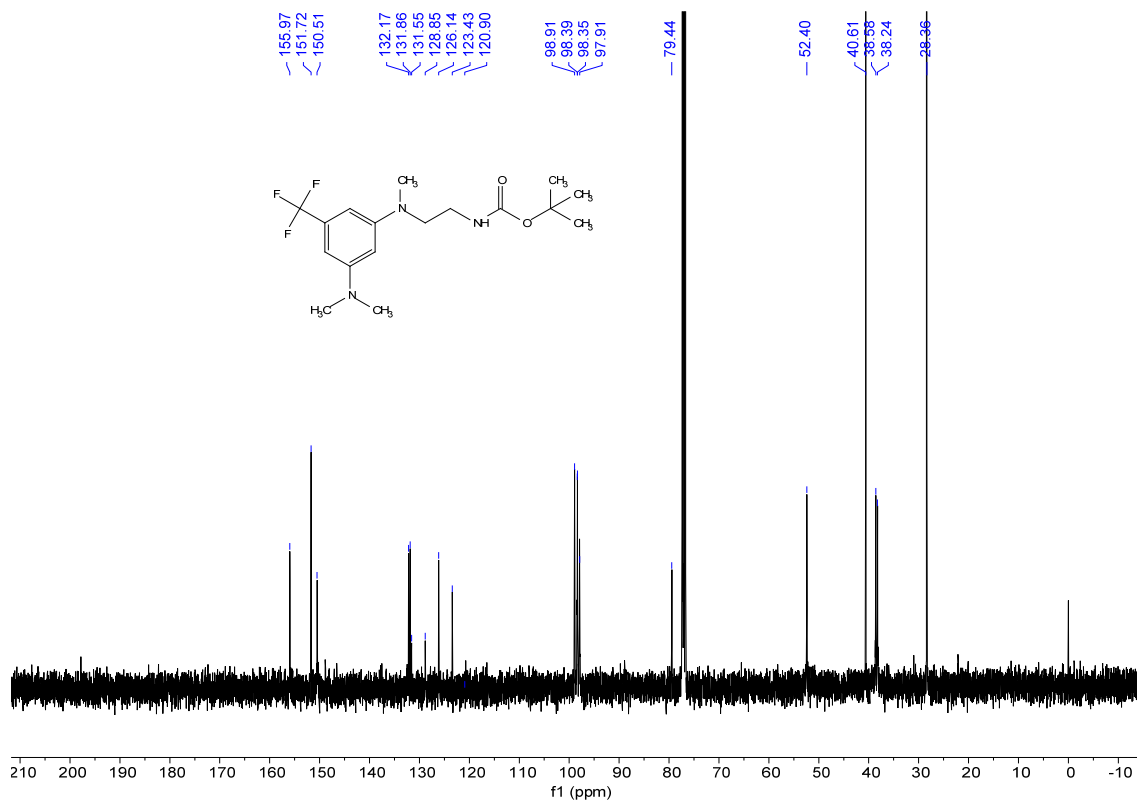

$^{13}\text{C}$  NMR spectrum of **1g**

$^{19}\text{F}$  NMR (376 MHz,  $\text{DMSO-}d_6$ )

-61.23

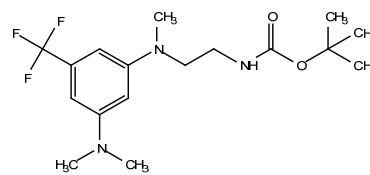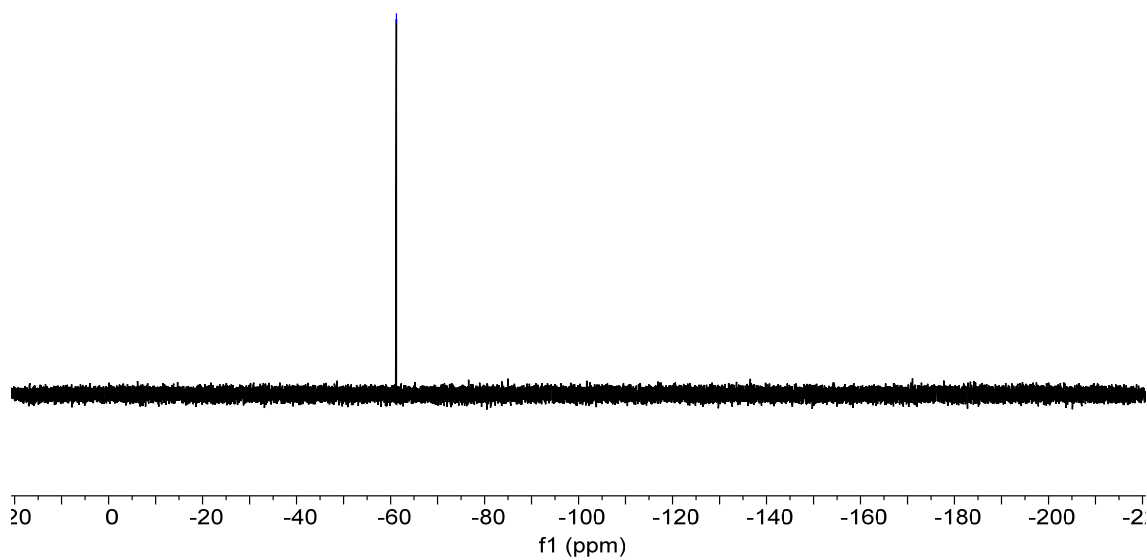

$^{19}\text{F}$  NMR spectrum of **1g**

$^1\text{H}$  NMR (400 MHz,  $\text{CDCl}_3$ )

$^1\text{H}$  NMR spectrum of **1h**

-7.26

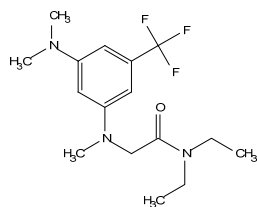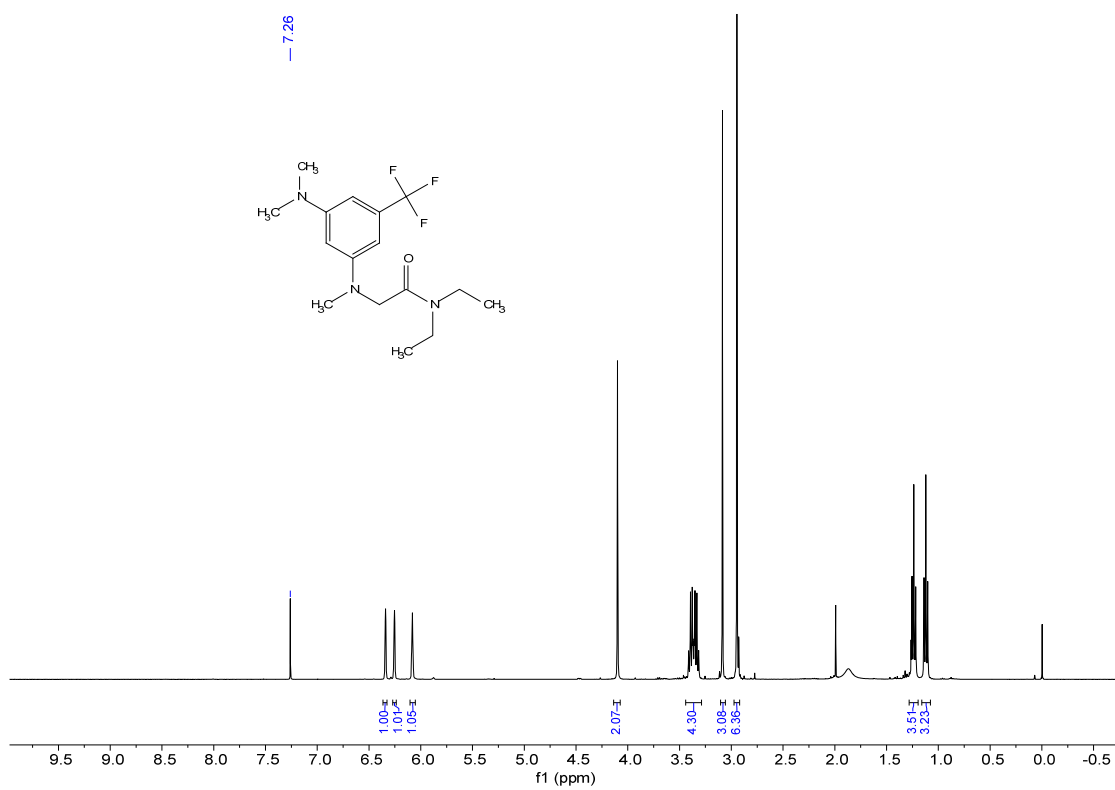

$^{13}\text{C}$  NMR (101 MHz,  $\text{CDCl}_3$ )

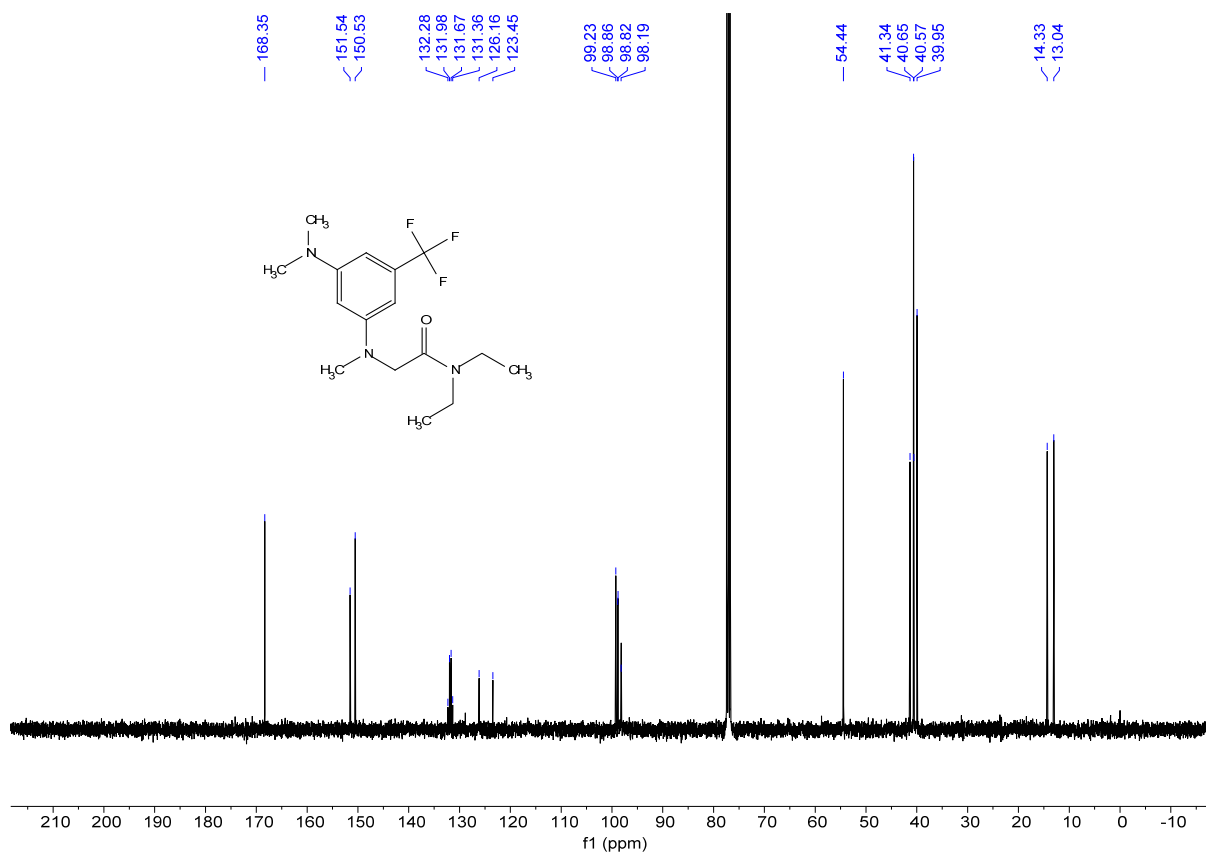

$^{19}\text{F}$  NMR (376 MHz,  $\text{CDCl}_3$ )

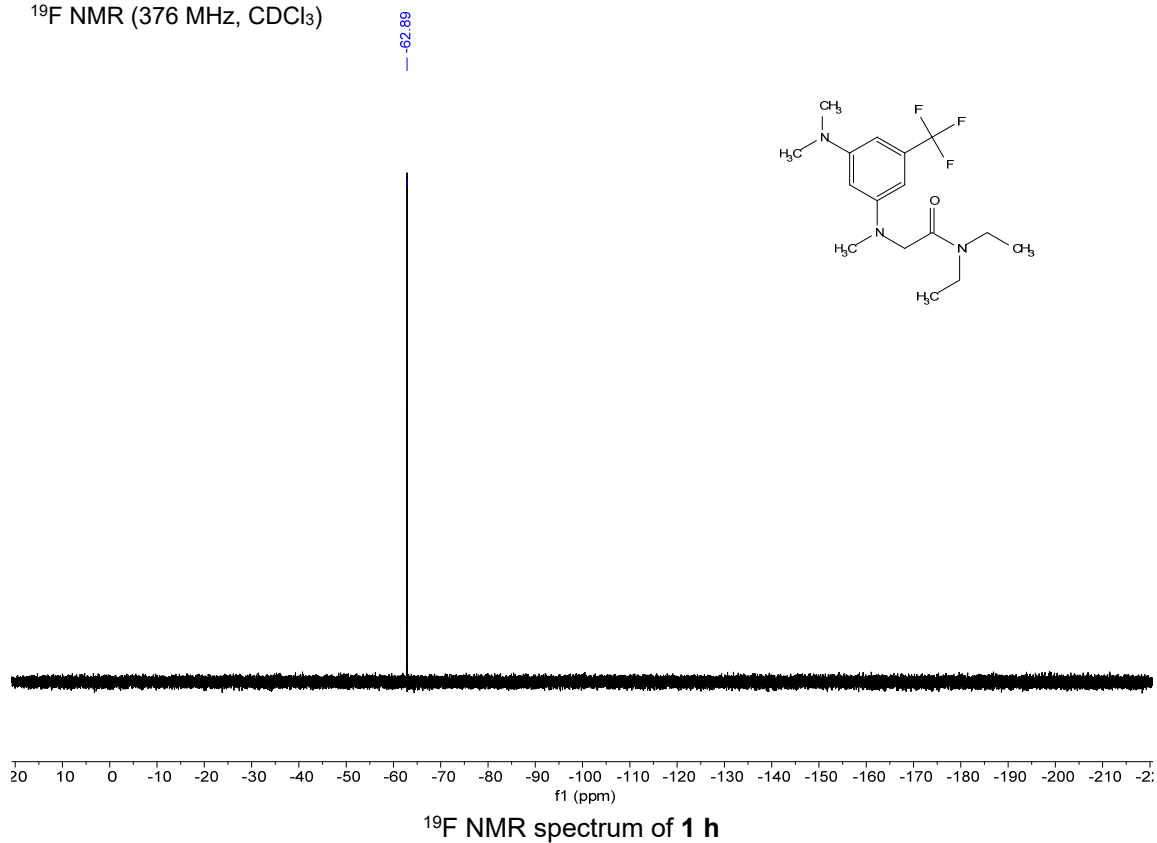

<sup>1</sup>H NMR (400 MHz, CDCl<sub>3</sub>)

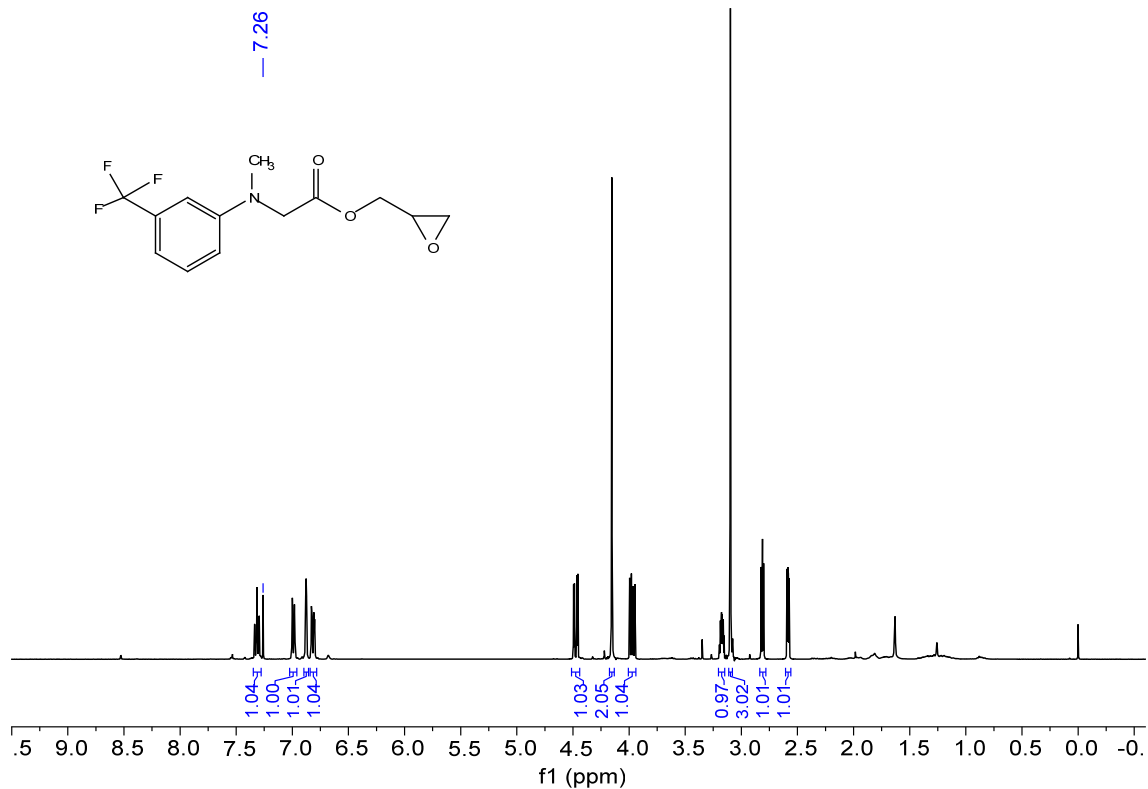

<sup>1</sup>H NMR spectrum of **1i**

<sup>13</sup>C NMR (101 MHz, CDCl<sub>3</sub>)

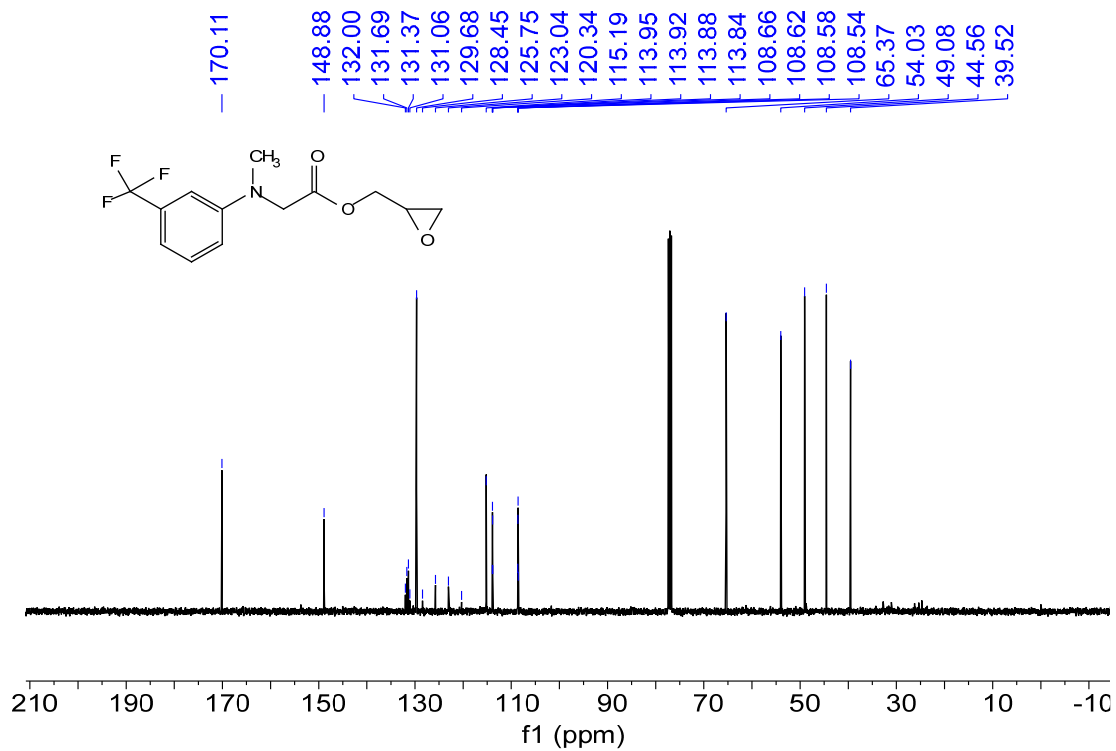

<sup>13</sup>C NMR spectrum of **1i**

<sup>19</sup>F NMR (376 MHz, CDCl<sub>3</sub>)

-62.74

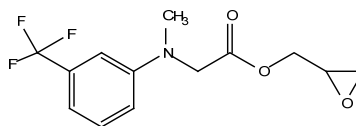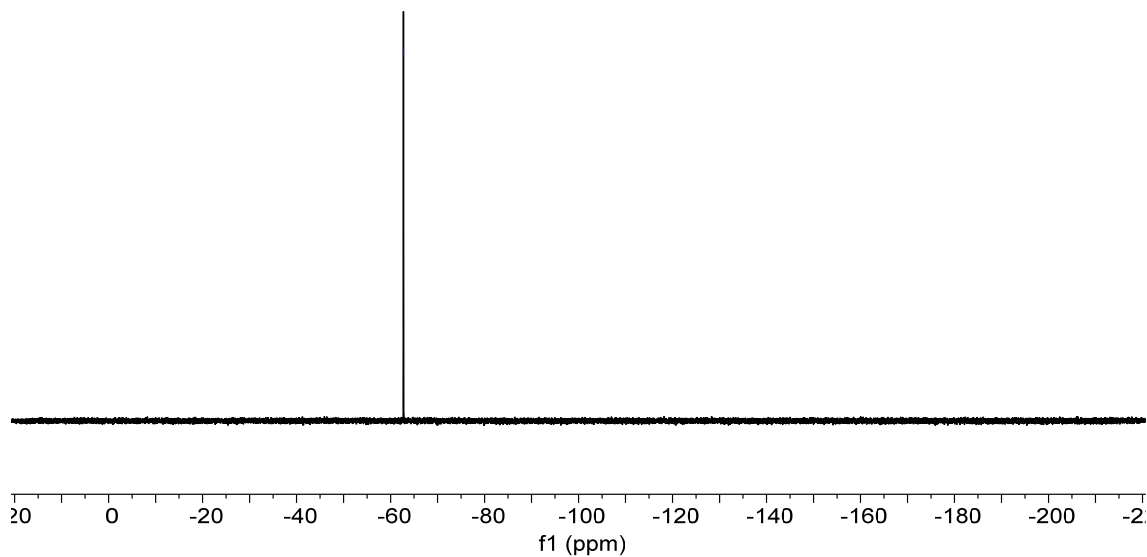

<sup>19</sup>F NMR spectrum of **1i**

<sup>1</sup>H NMR (400 MHz, CDCl<sub>3</sub>)

7.26

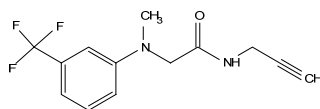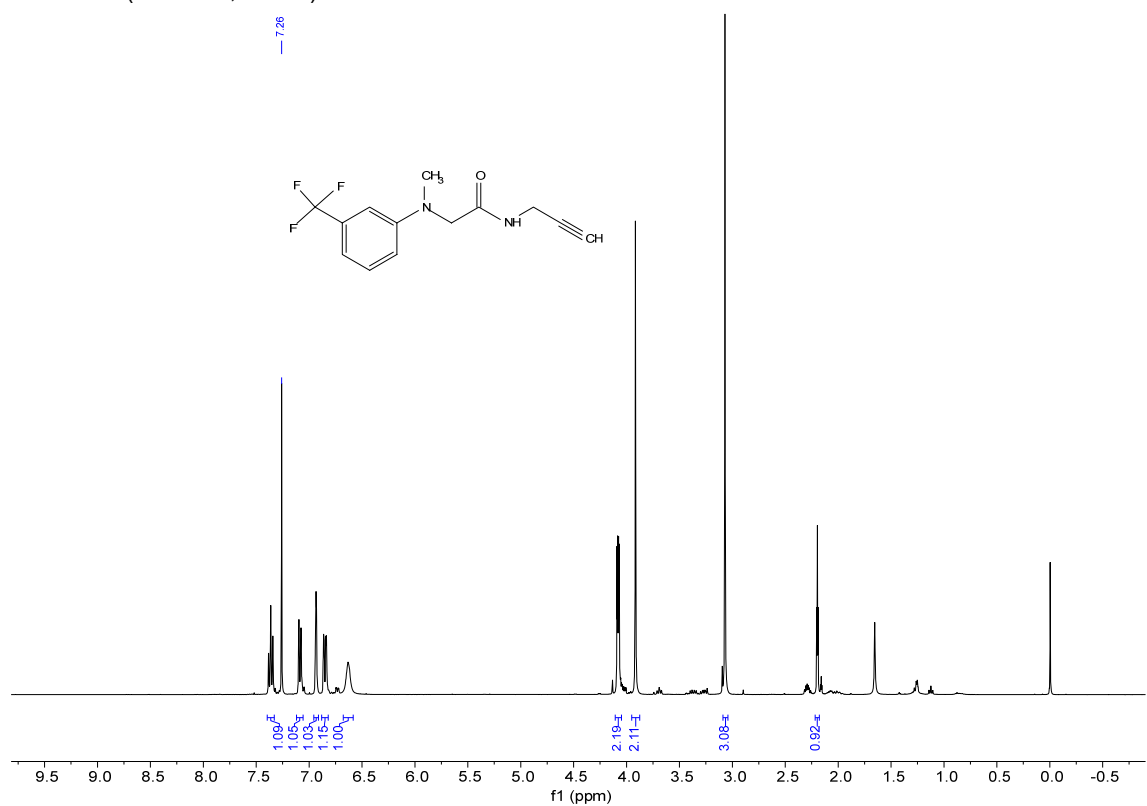

<sup>1</sup>H NMR spectrum of **1j**

$^{13}\text{C}$  NMR (101 MHz,  $\text{CDCl}_3$ )

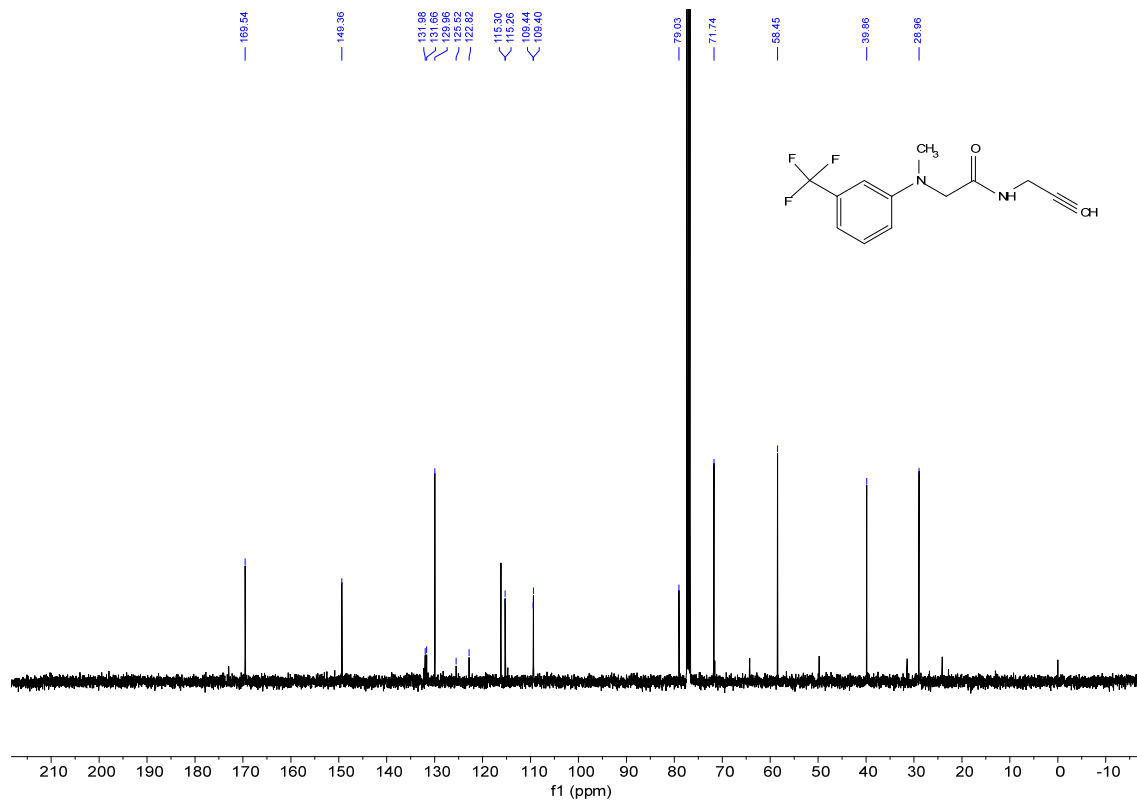

$^{13}\text{C}$  NMR spectrum of **1j**

$^{19}\text{F}$  NMR (376 MHz,  $\text{CDCl}_3$ )

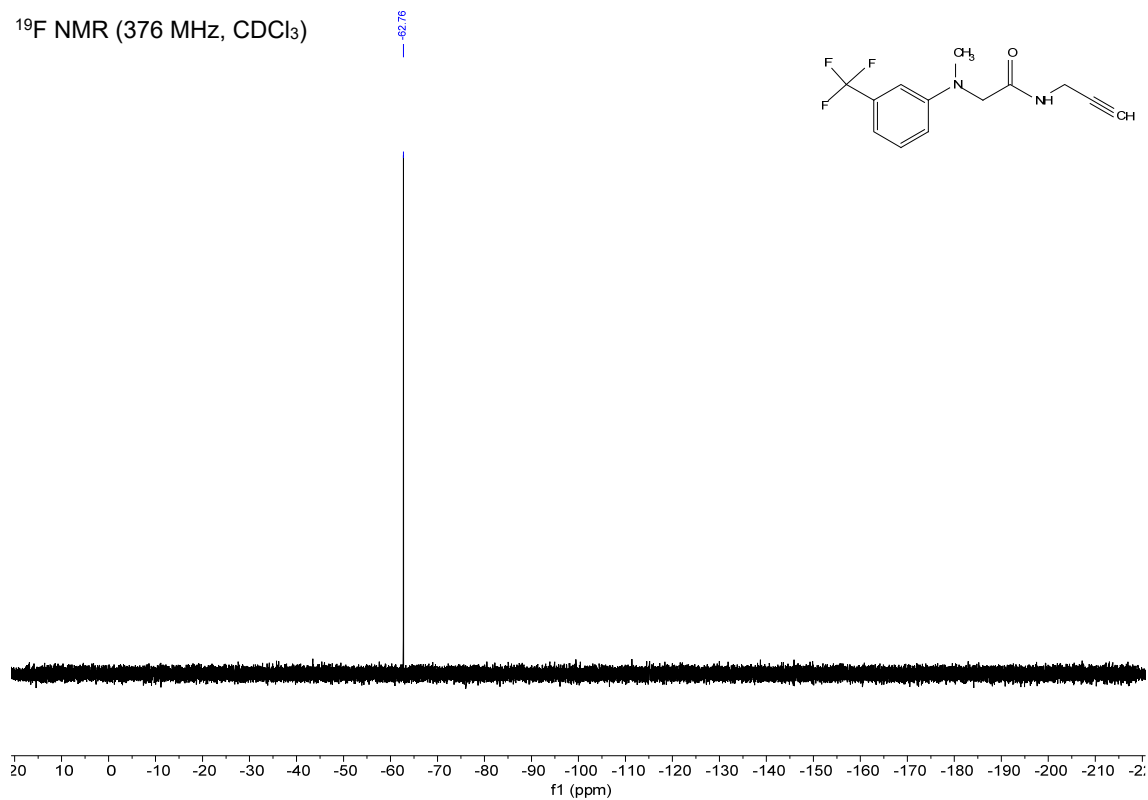

$^{19}\text{F}$  NMR spectrum of **1j**

$^1\text{H}$  NMR (400 MHz,  $\text{CDCl}_3$ )

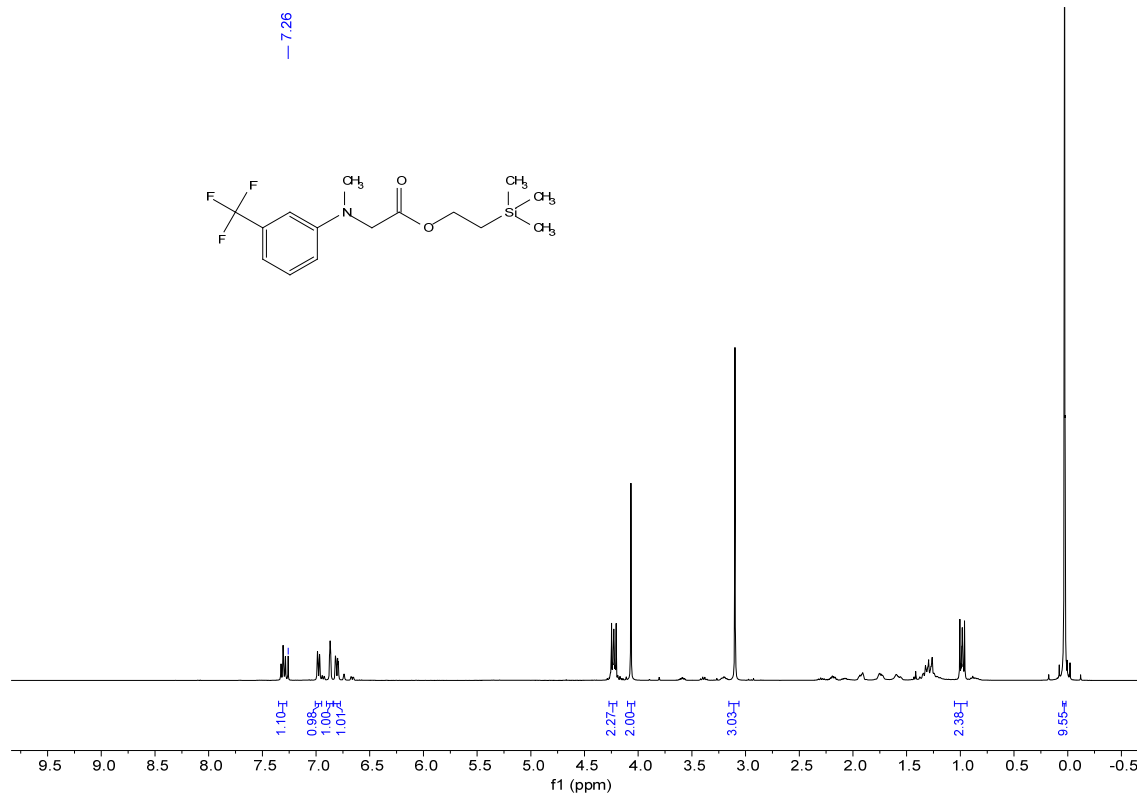

$^1\text{H}$  NMR spectrum of **1k**

$^{13}\text{C}$  NMR (101 MHz,  $\text{CDCl}_3$ )

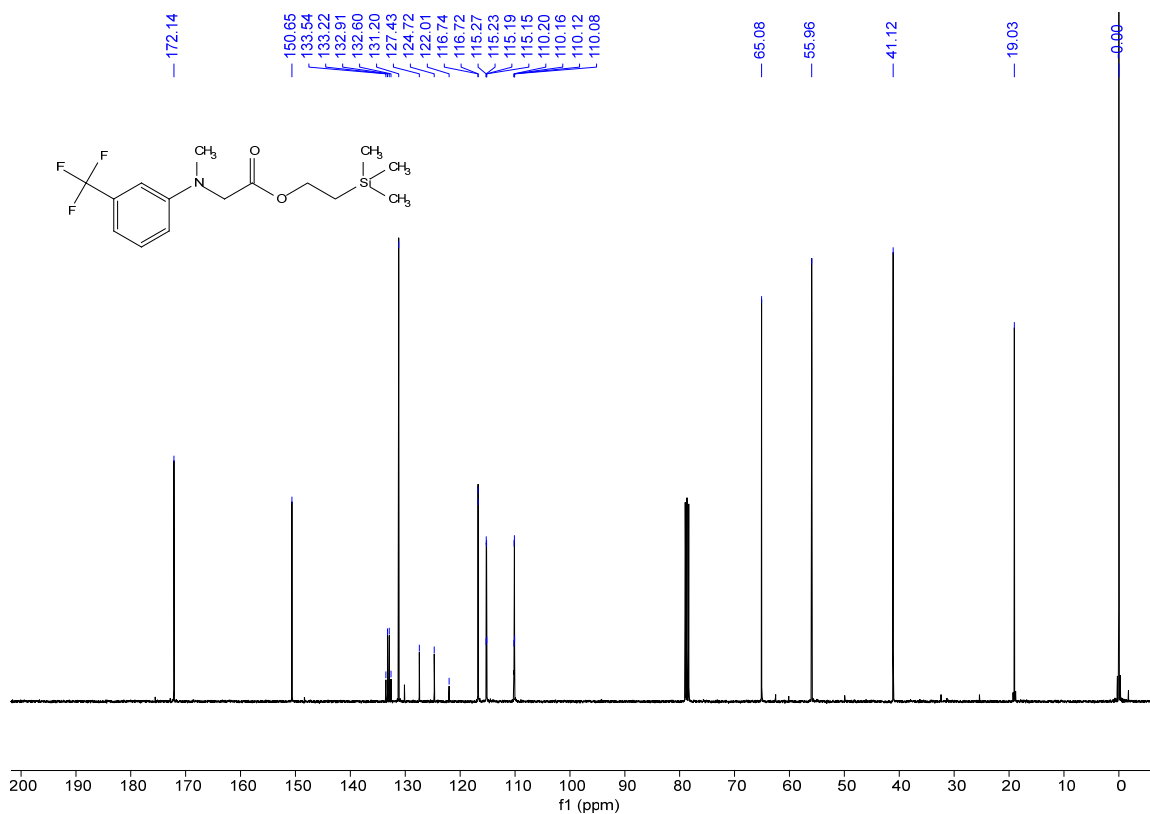

$^{13}\text{C}$  NMR spectrum of **1k**



$^{19}\text{F}$  NMR (376 MHz,  $\text{CDCl}_3$ )

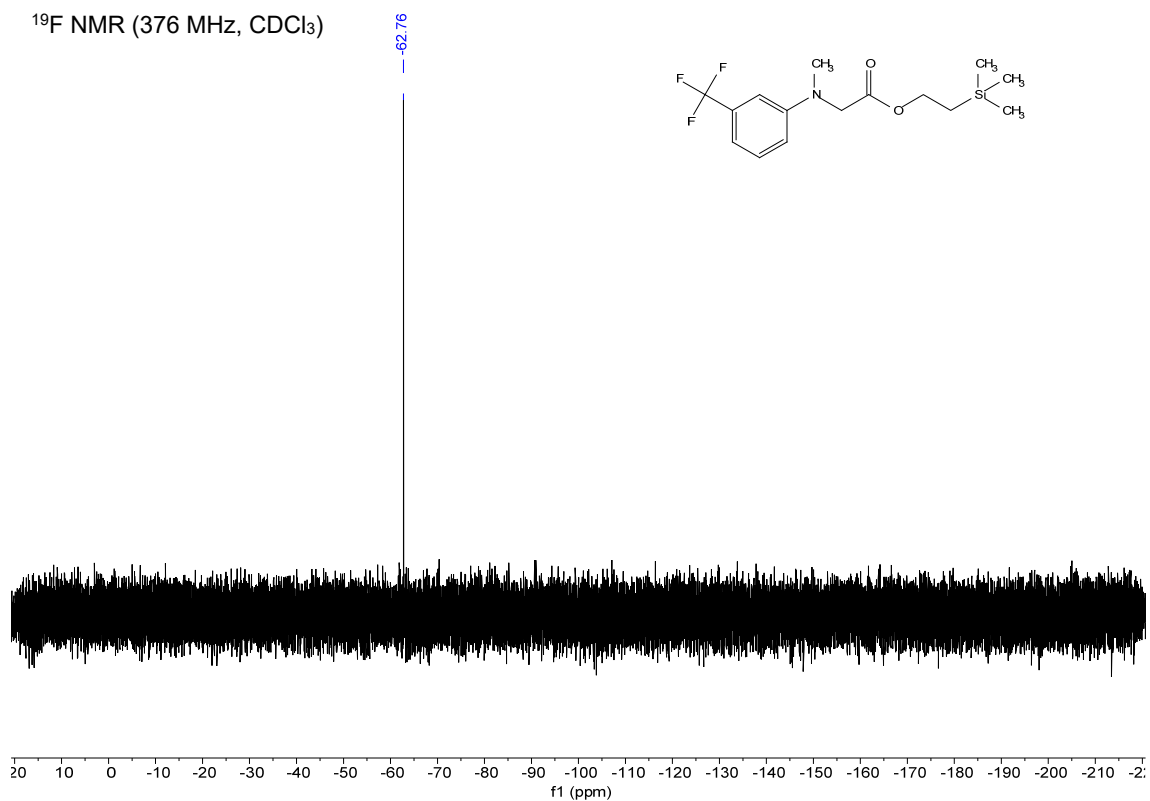

$^{19}\text{F}$  NMR spectrum of **1k**

$^1\text{H}$  NMR (400 MHz,  $\text{DMSO}-d_6$ )

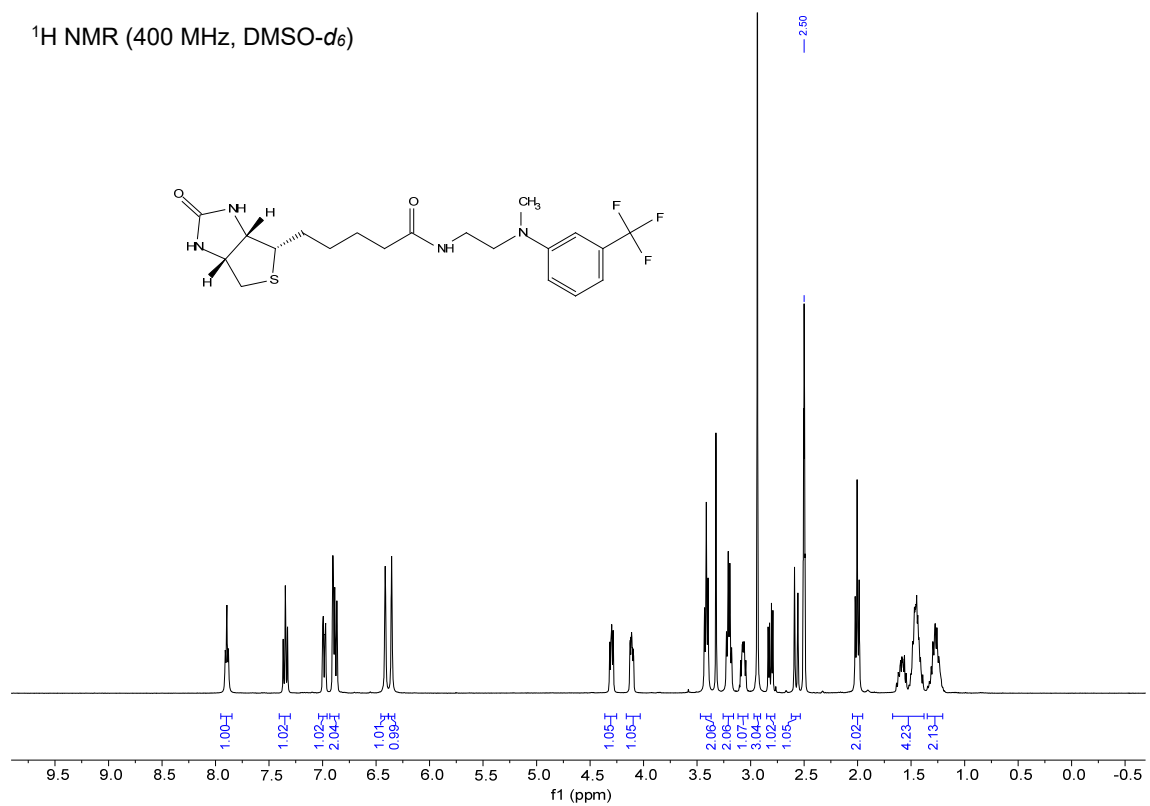

$^1\text{H}$  NMR spectrum of **1l**

<sup>13</sup>C NMR (101 MHz, DMSO-*d*<sub>6</sub>)

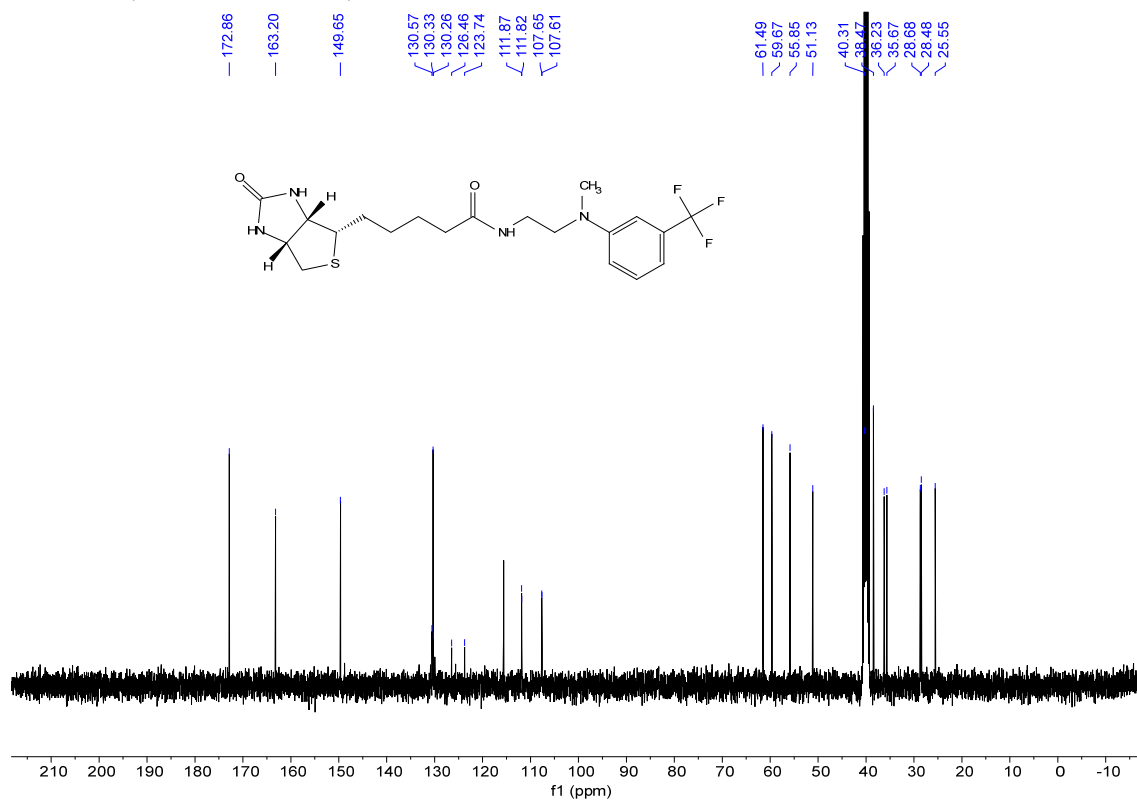

<sup>13</sup>C NMR spectrum of **11**

<sup>19</sup>F NMR (376 MHz, DMSO-*d*<sub>6</sub>)

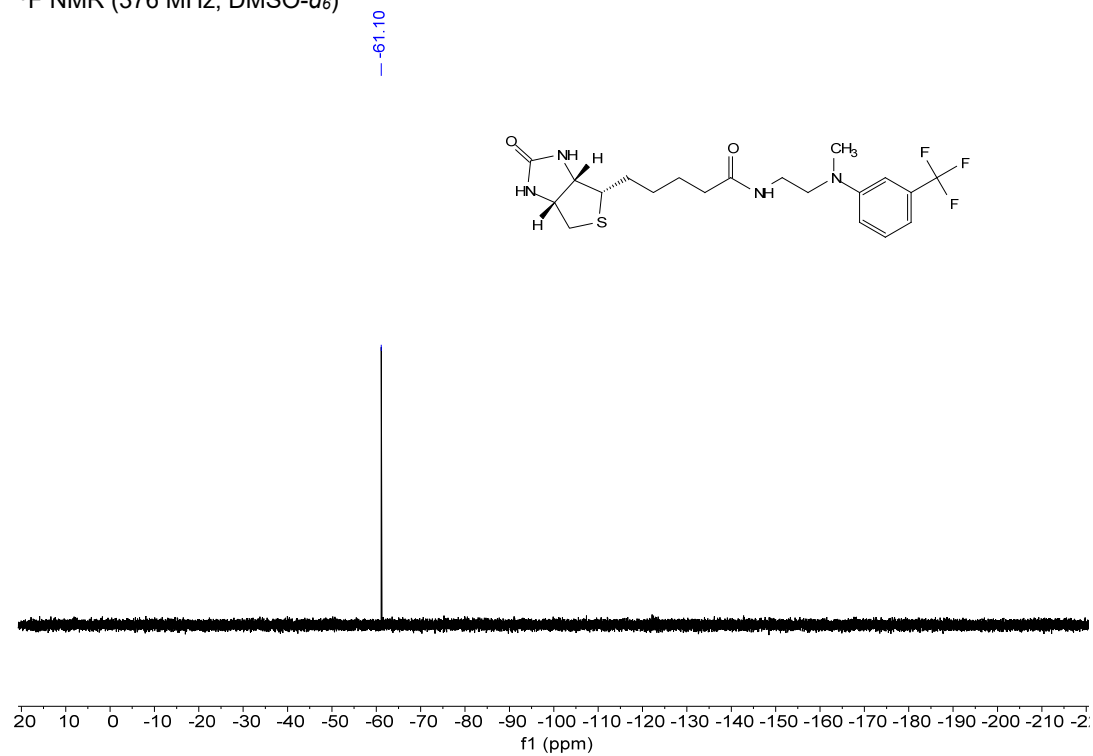

<sup>19</sup>F NMR spectrum of **11**

<sup>1</sup>H NMR (400 MHz, CDCl<sub>3</sub>)

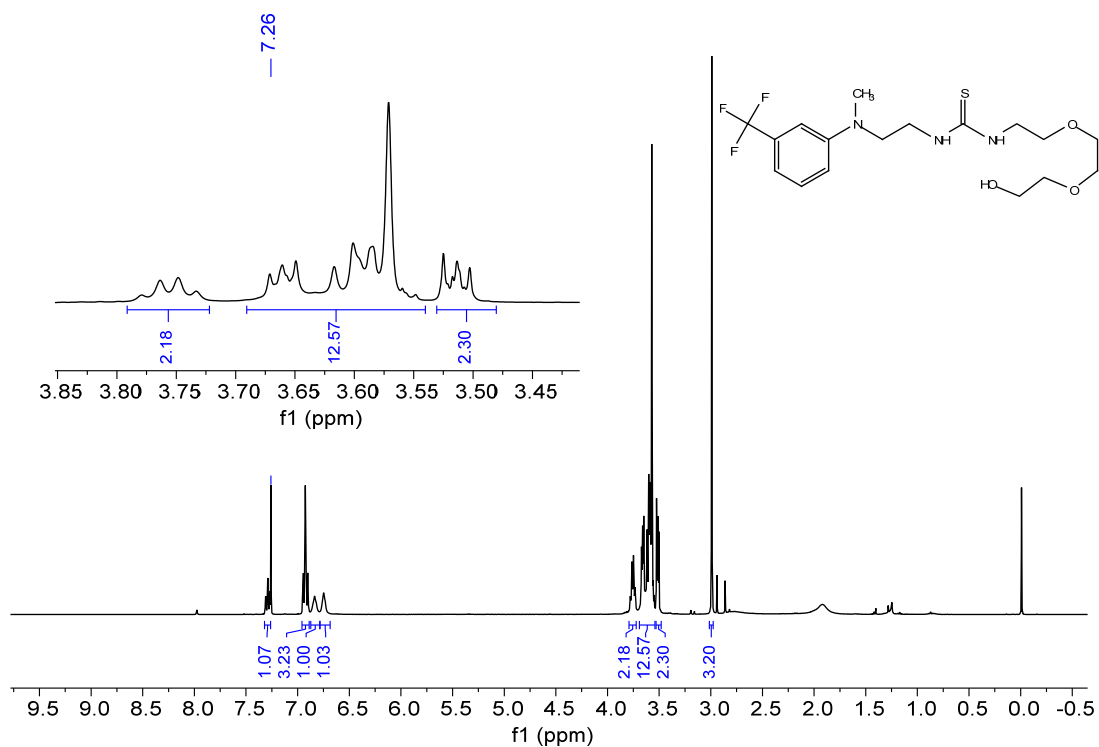

<sup>1</sup>H NMR spectrum of **1m**

<sup>13</sup>C NMR (101 MHz, CDCl<sub>3</sub>)

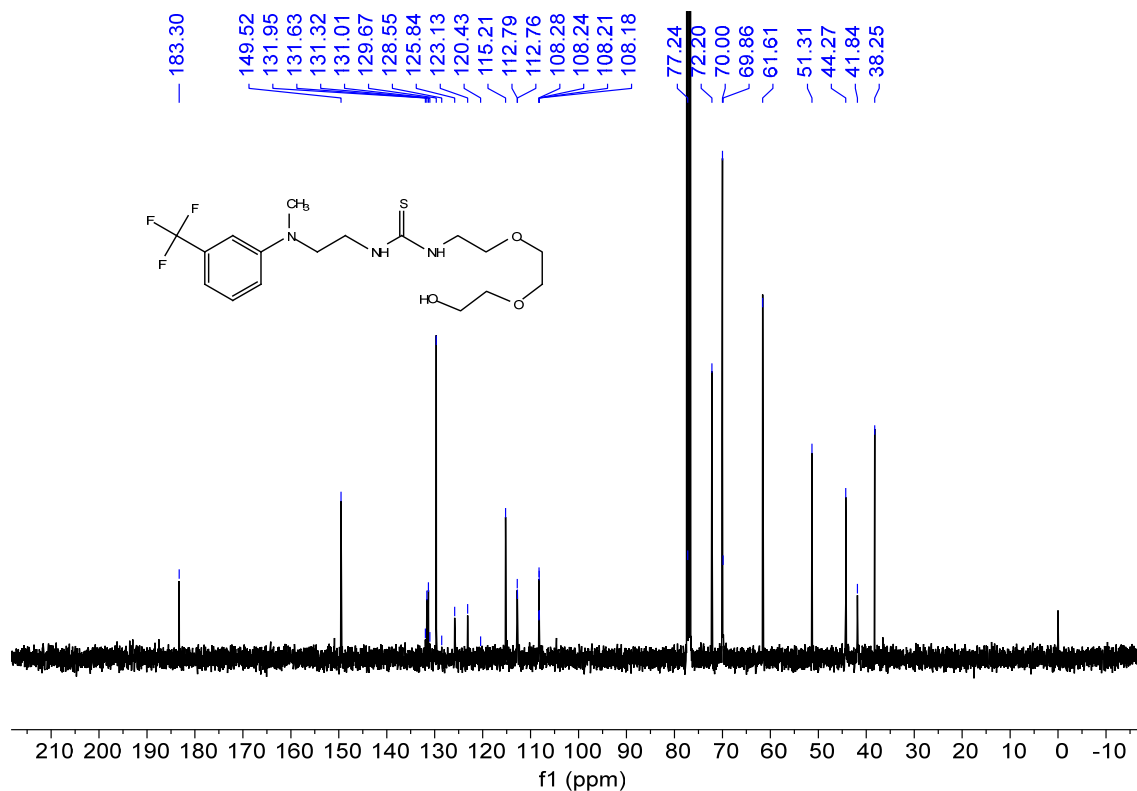

<sup>13</sup>C NMR spectrum of **1m**

$^{19}\text{F}$  NMR (376 MHz,  $\text{CDCl}_3$ )

-62.64

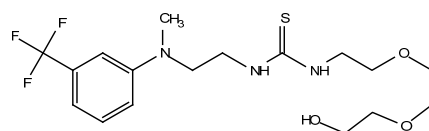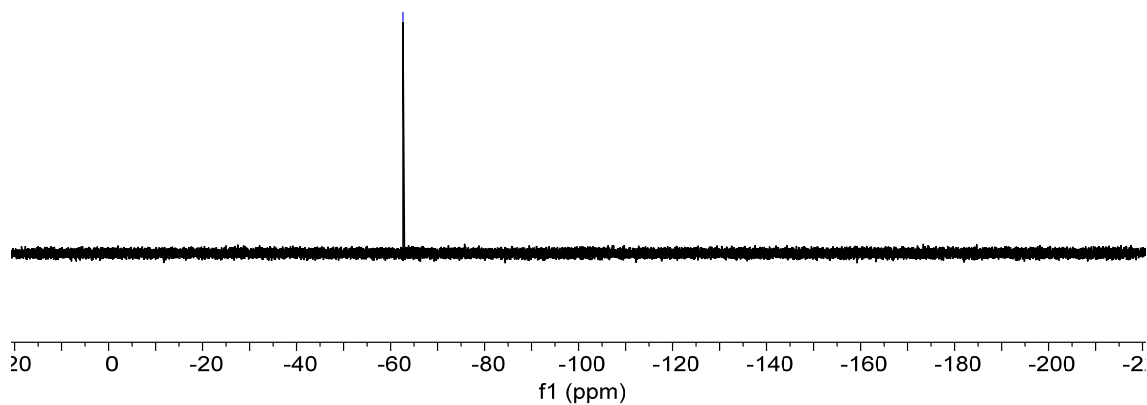

$^{19}\text{F}$  NMR spectrum of **1m**

$^1\text{H}$  NMR (400 MHz,  $\text{CDCl}_3$ )

-7.26

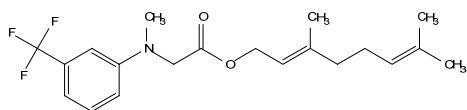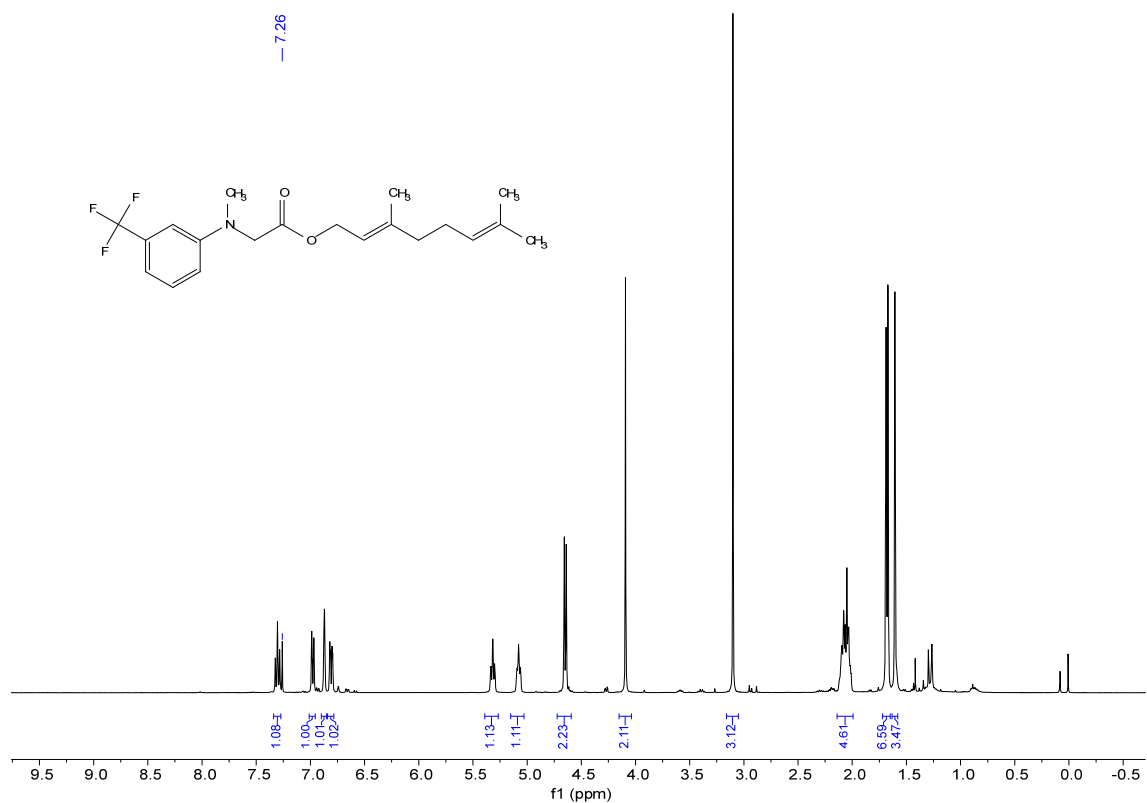

$^1\text{H}$  NMR spectrum of **1n**

<sup>13</sup>C NMR (101 MHz, CDCl<sub>3</sub>)

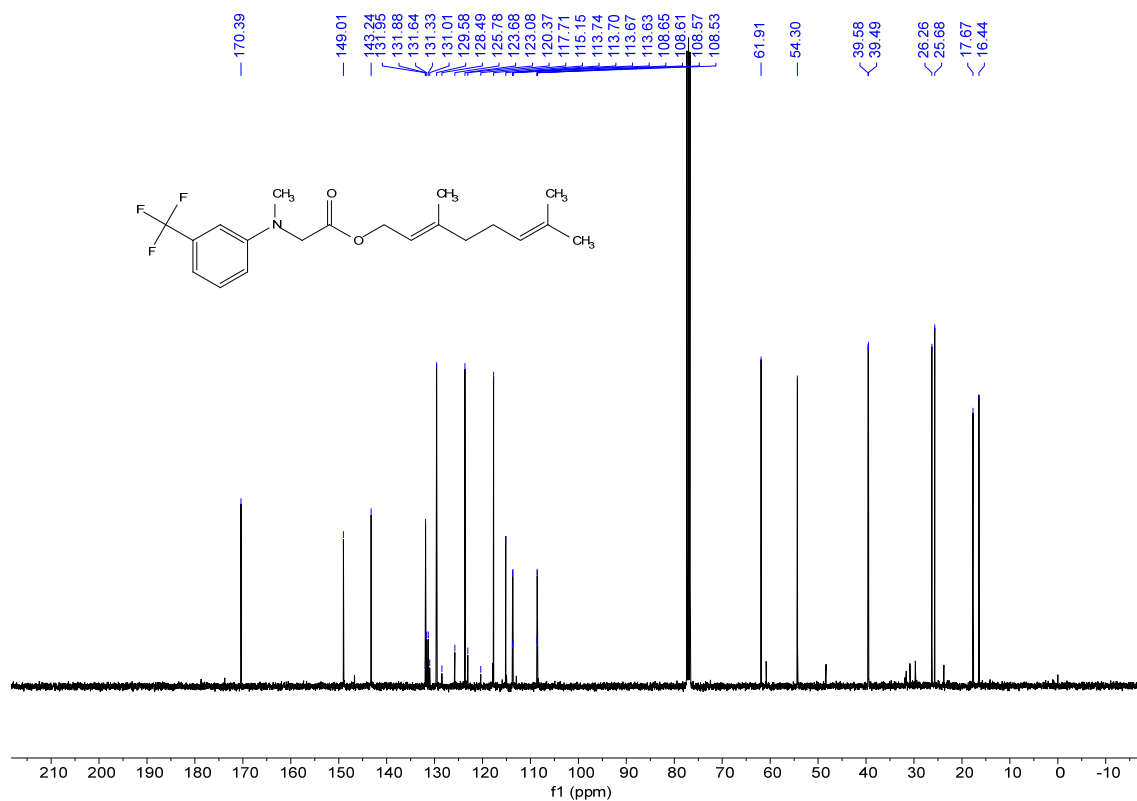

<sup>13</sup>C NMR spectrum of **1n**

<sup>19</sup>F NMR (376 MHz, CDCl<sub>3</sub>)

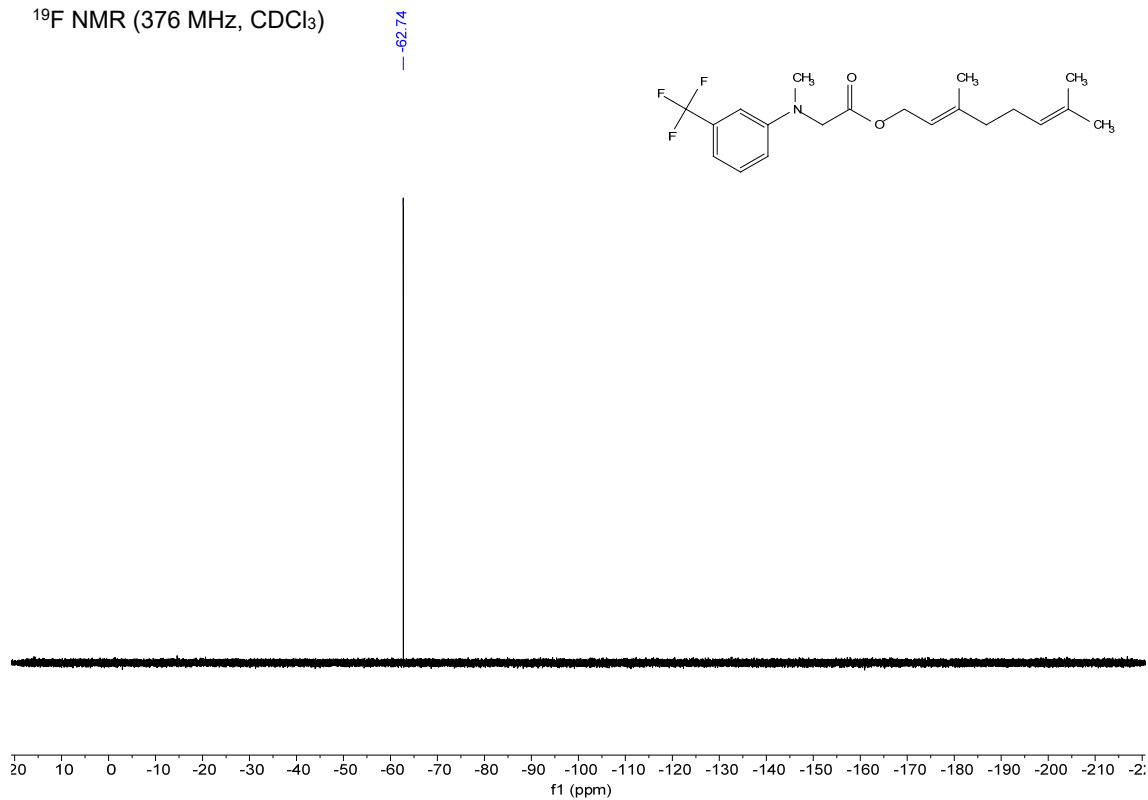

<sup>19</sup>F NMR spectrum of **1n**

<sup>1</sup>H NMR (400 MHz, CDCl<sub>3</sub>)

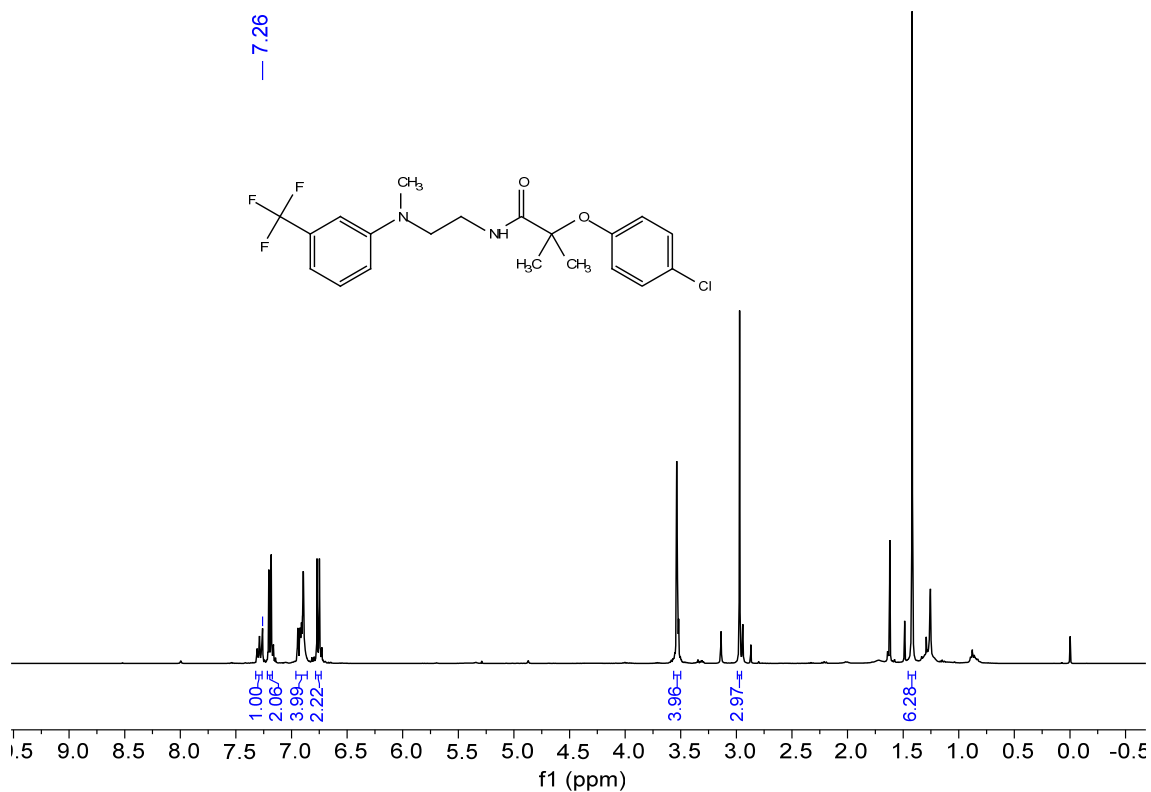

<sup>1</sup>H NMR spectrum of **1o**

<sup>13</sup>C NMR (101 MHz, CDCl<sub>3</sub>)

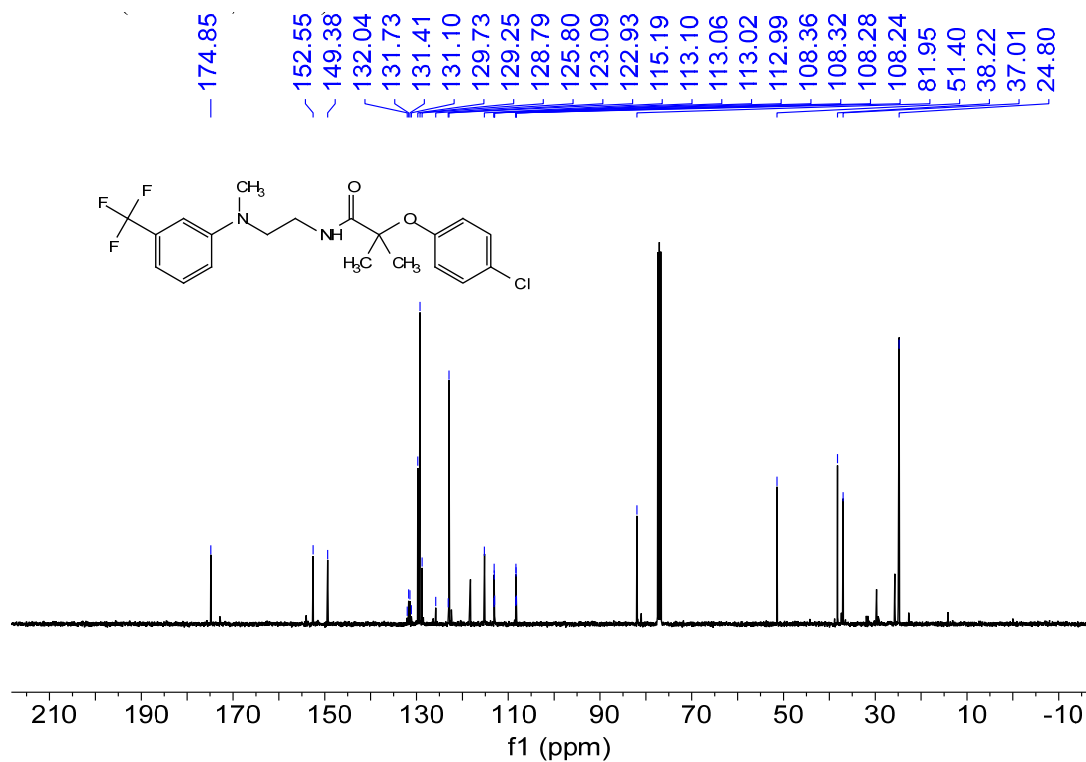

<sup>13</sup>C NMR spectrum of **1o**

$^{19}\text{F}$  NMR (376 MHz,  $\text{CDCl}_3$ )

-62.69

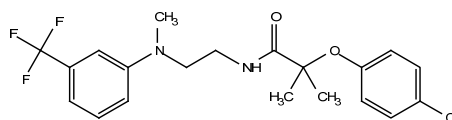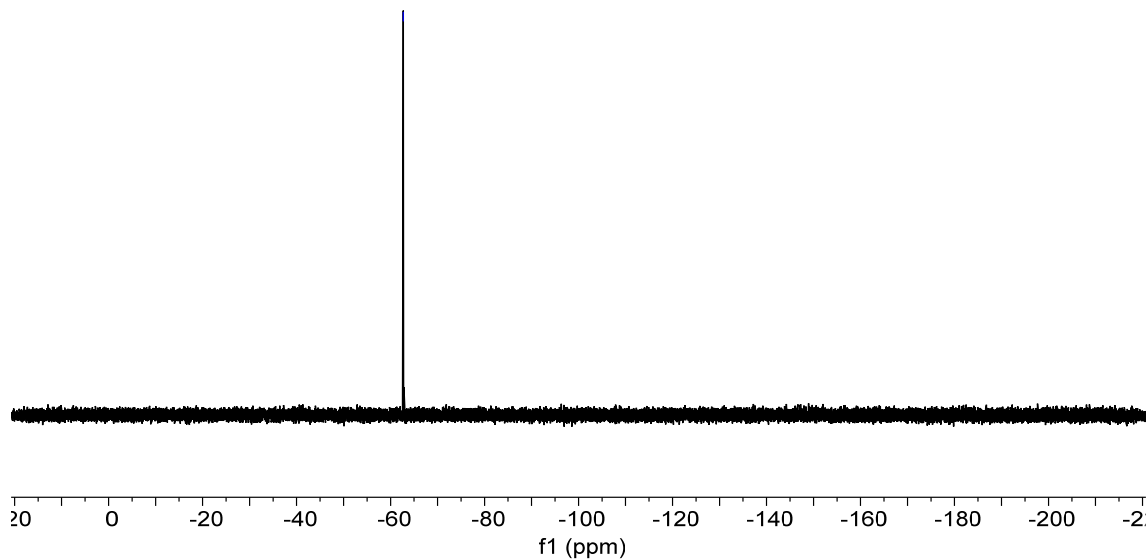

$^{19}\text{F}$  NMR spectrum of **1o**

$^1\text{H}$  NMR (400 MHz,  $\text{DMSO-}d_6$ )

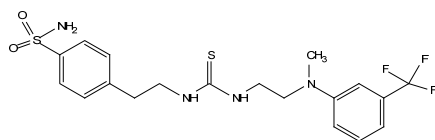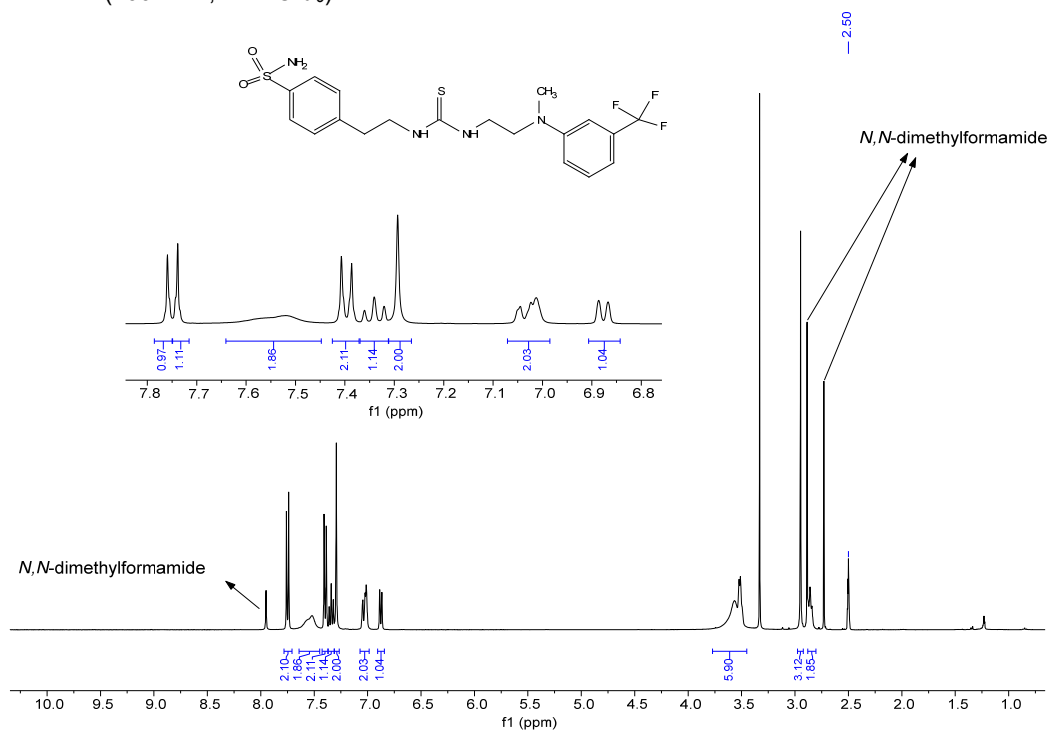

$^1\text{H}$  NMR spectrum of **1p**

<sup>13</sup>C NMR (101 MHz, DMSO-*d*<sub>6</sub>)

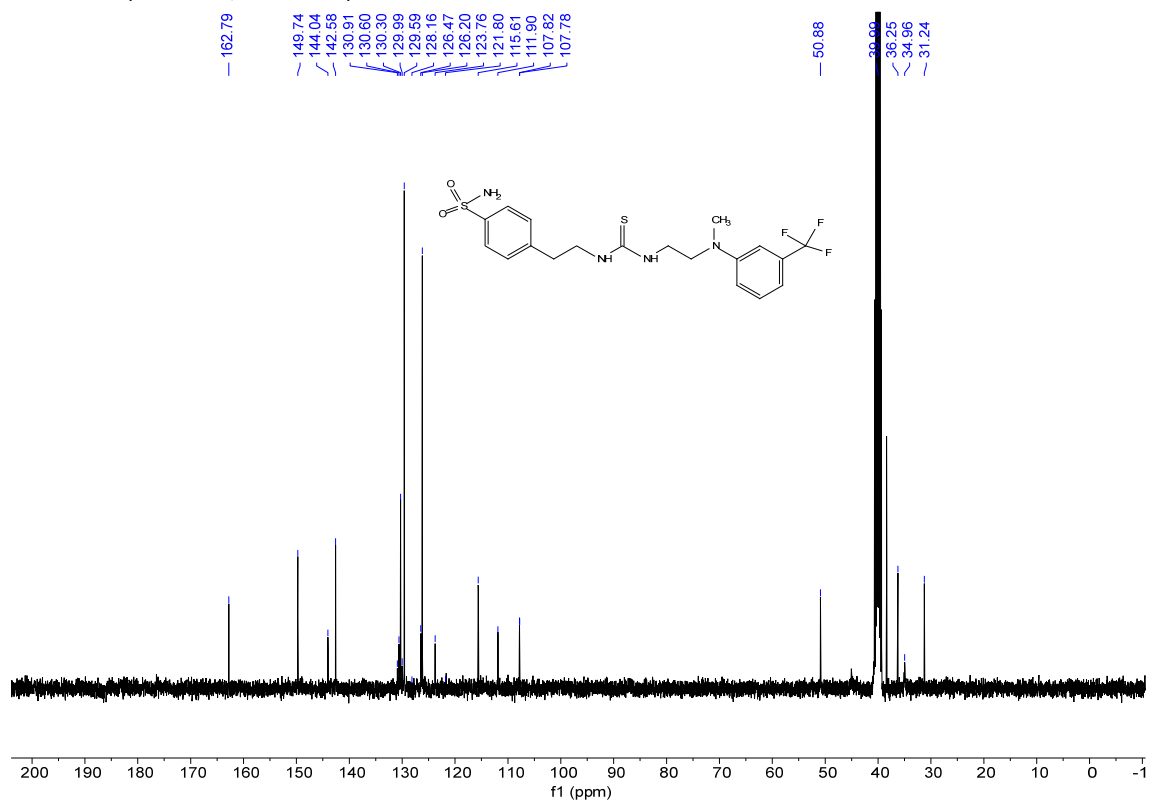

<sup>13</sup>C NMR spectrum of **1p**

<sup>19</sup>F NMR (376 MHz, DMSO-*d*<sub>6</sub>)

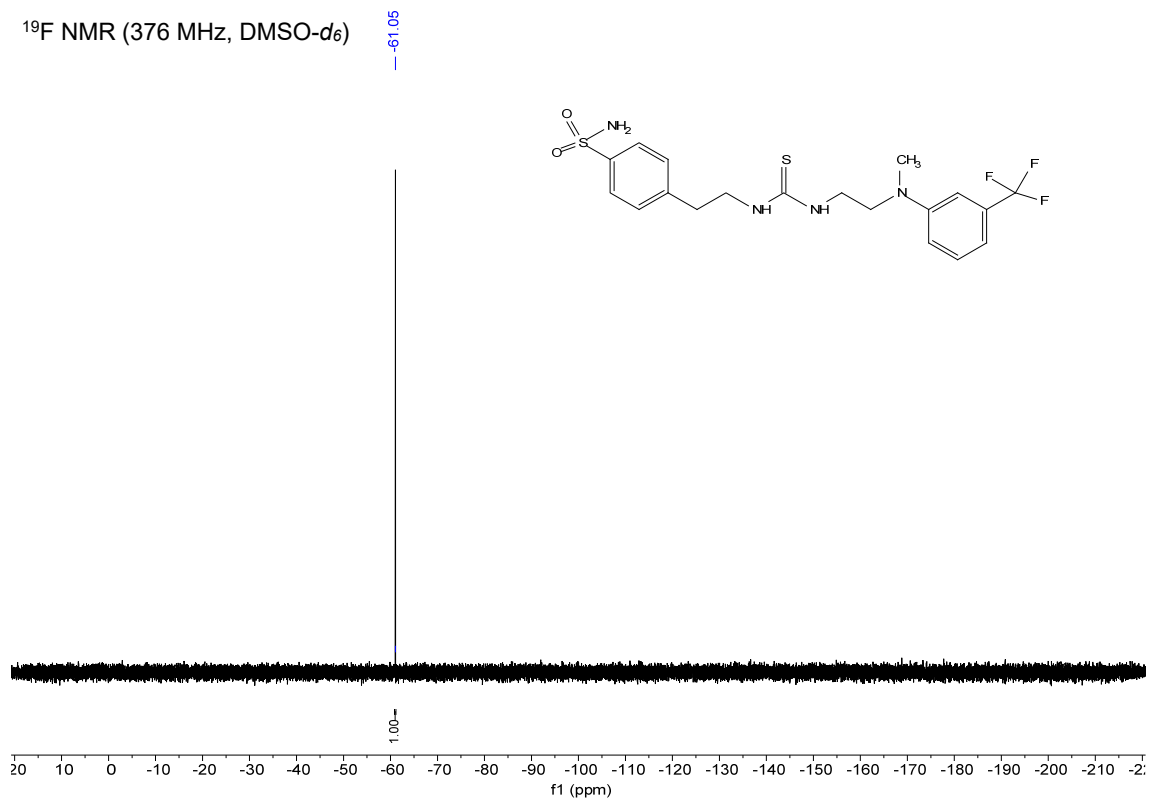

<sup>19</sup>F NMR spectrum of **1p**



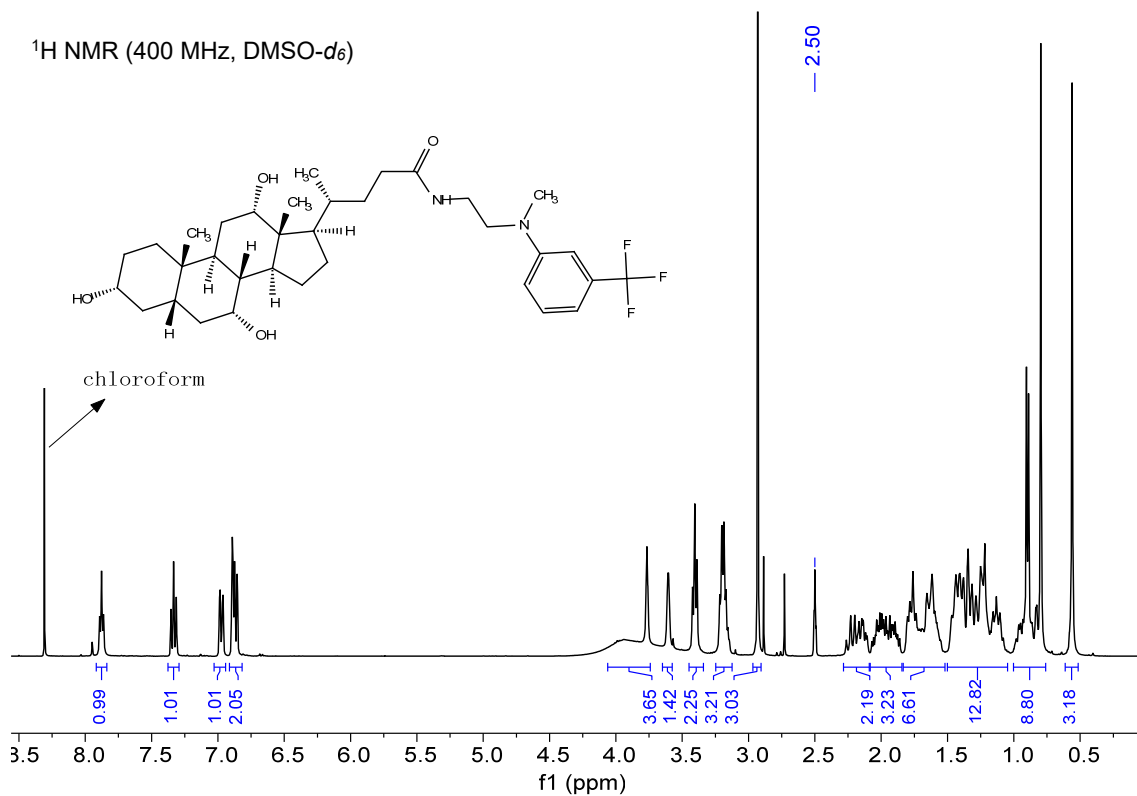

<sup>1</sup>H NMR spectrum of **1q**

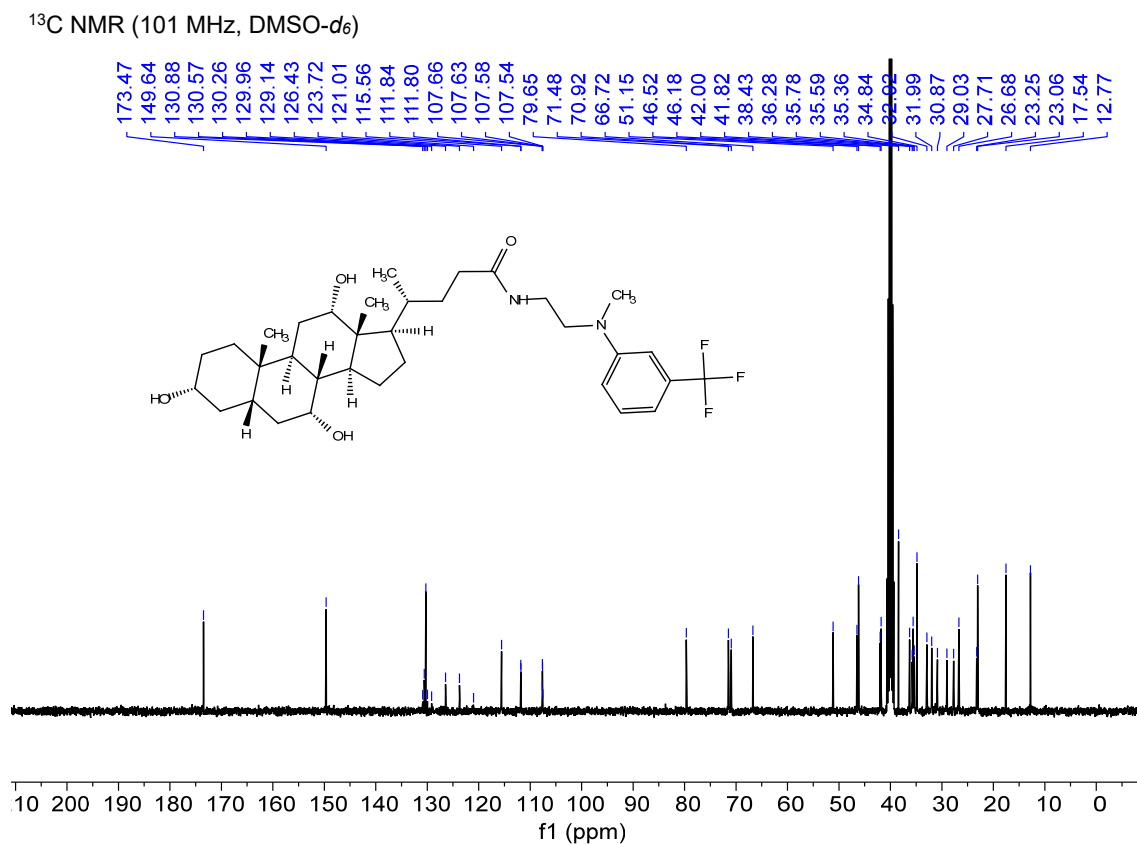

<sup>13</sup>C NMR spectrum of **1q**

$^{19}\text{F}$  NMR (376 MHz,  $\text{DMSO-}d_6$ )

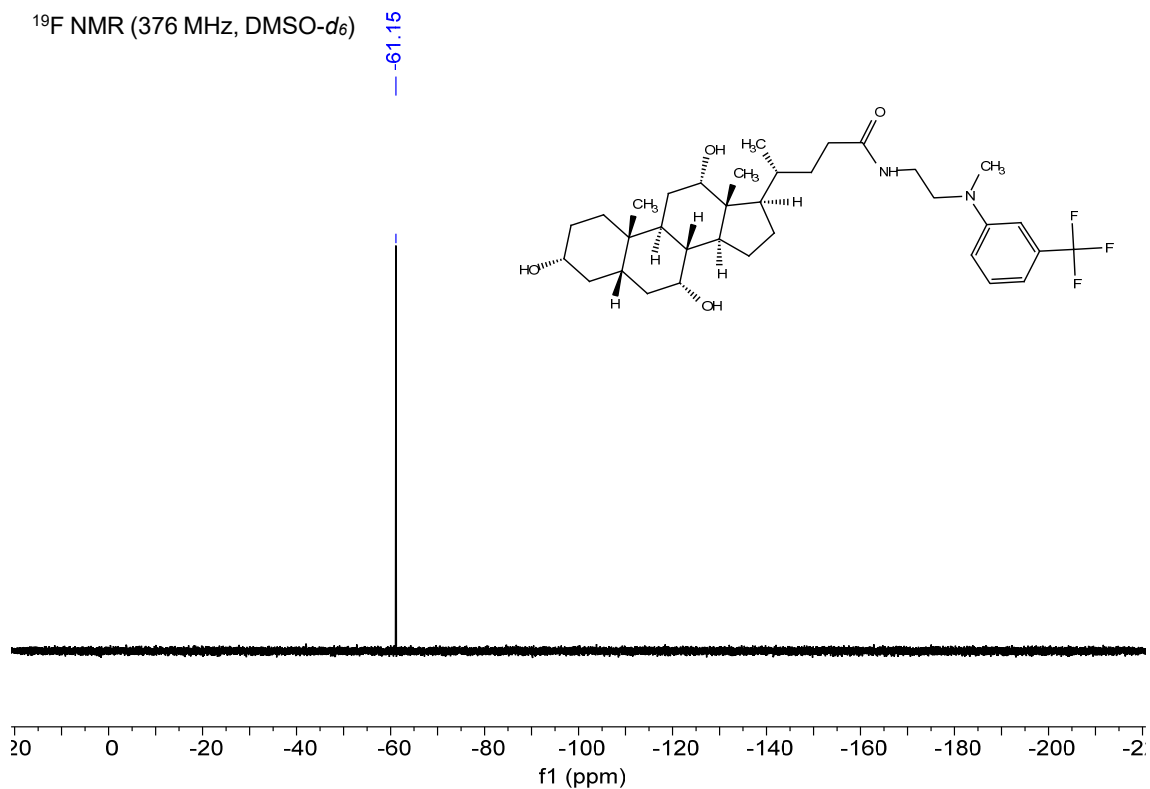

$^1\text{H}$  NMR (400 MHz,  $\text{CDCl}_3$ )

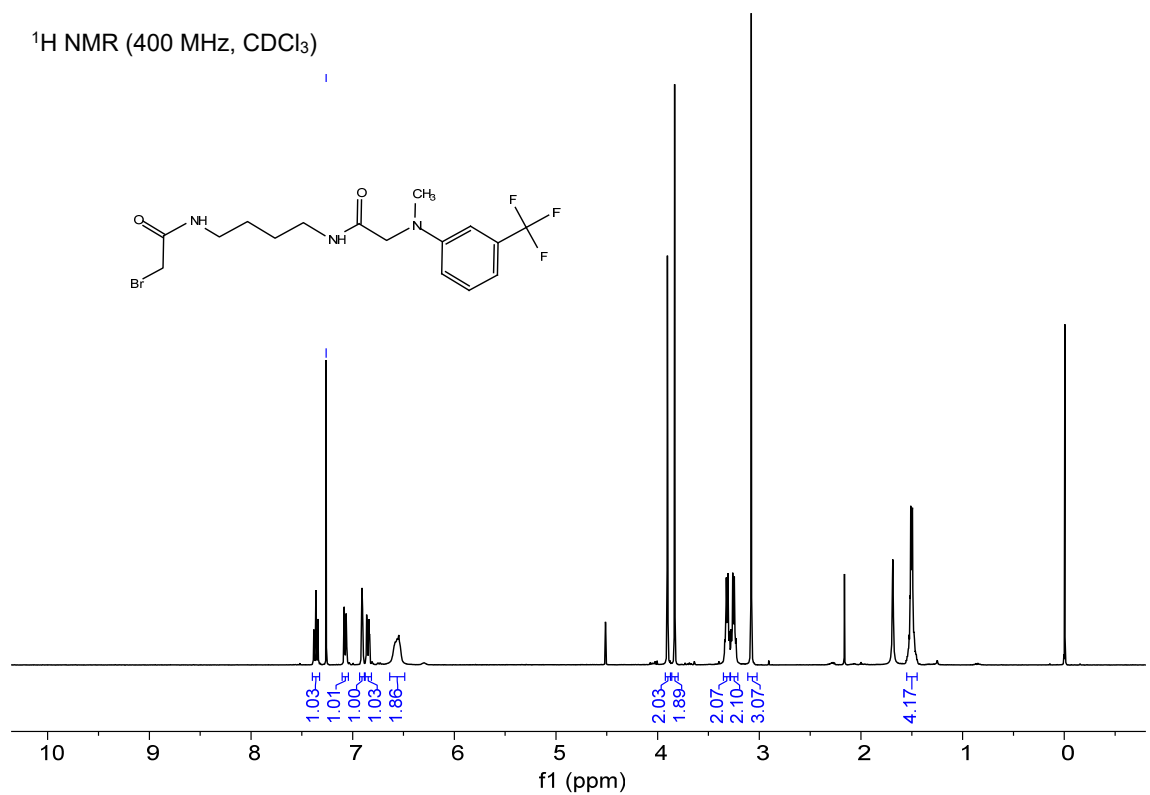

<sup>13</sup>C NMR (101 MHz, CDCl<sub>3</sub>)

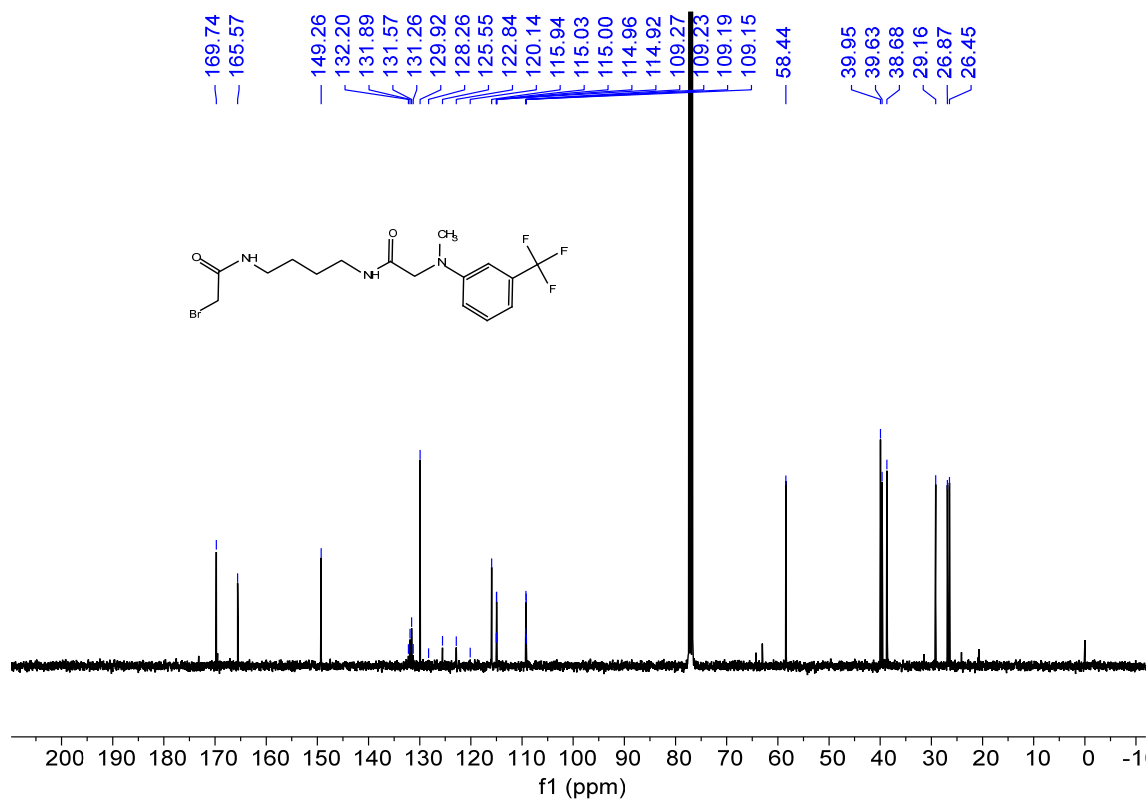

<sup>13</sup>C NMR spectrum of **1r**

<sup>19</sup>F NMR (376 MHz, CDCl<sub>3</sub>)

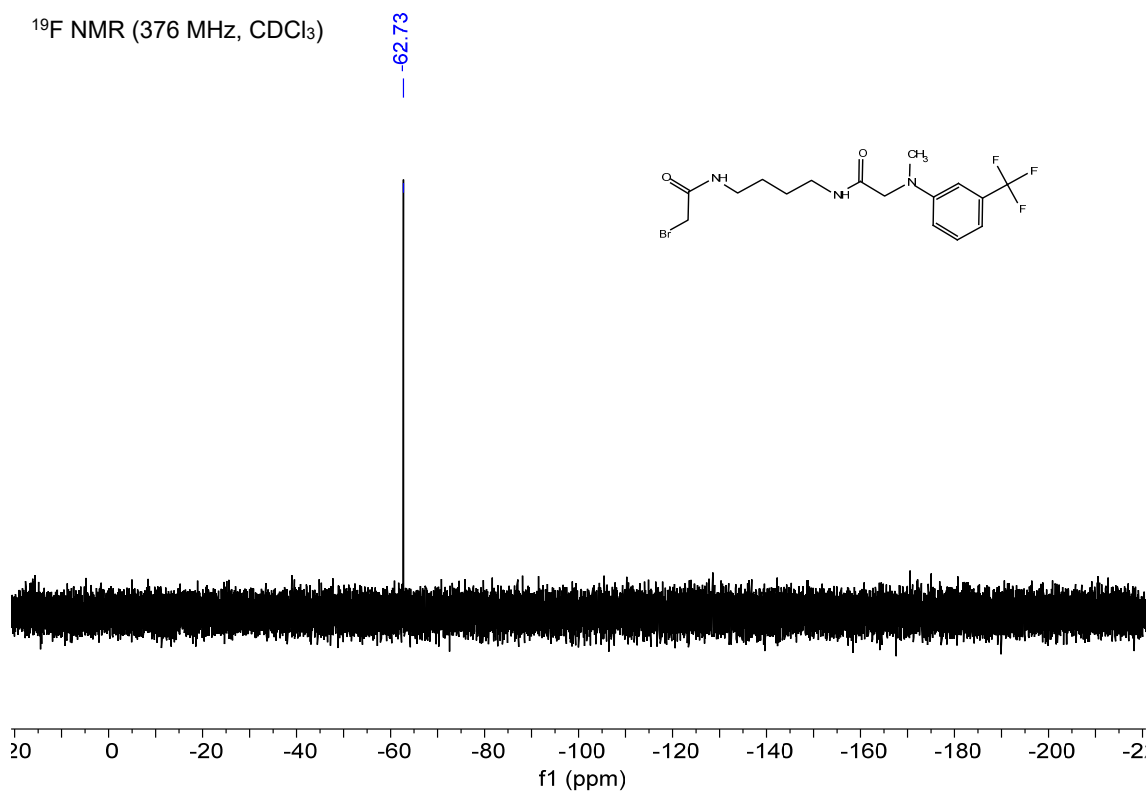

<sup>19</sup>F NMR spectrum of **1r**

<sup>1</sup>H NMR (400 MHz, CDCl<sub>3</sub>)

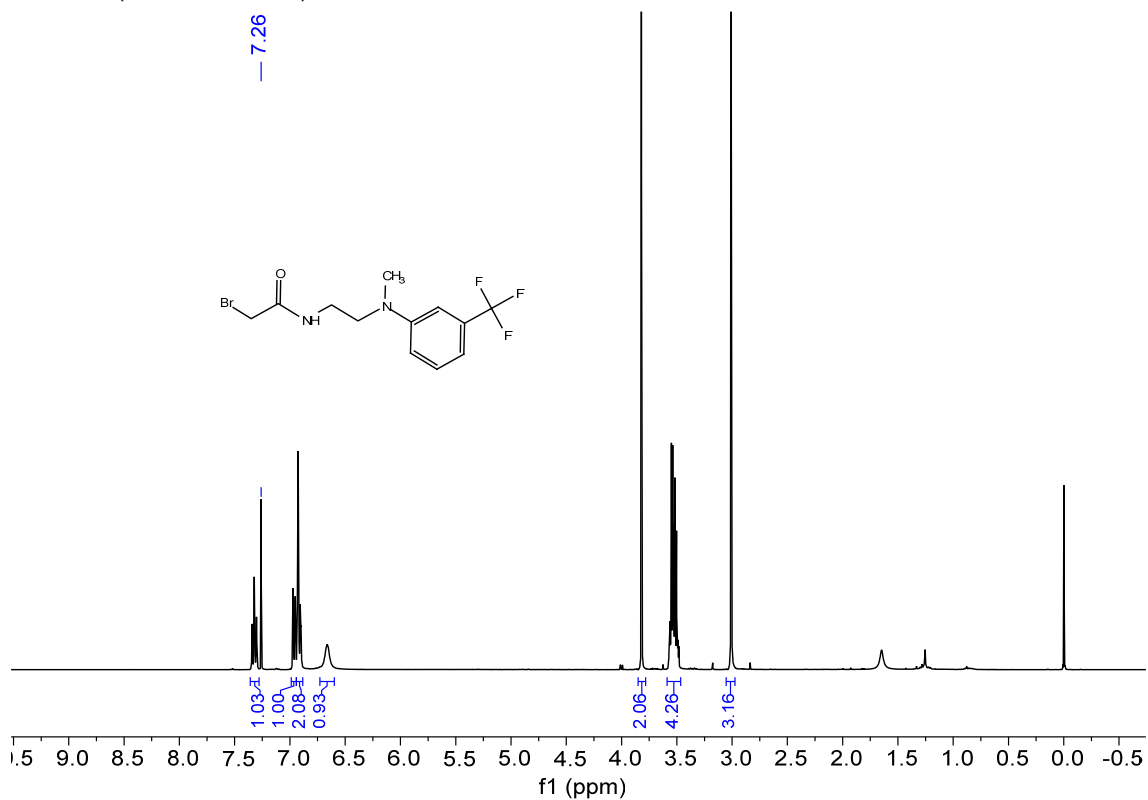

<sup>1</sup>H NMR spectrum of **1s**

<sup>13</sup>C NMR (101 MHz, CDCl<sub>3</sub>)

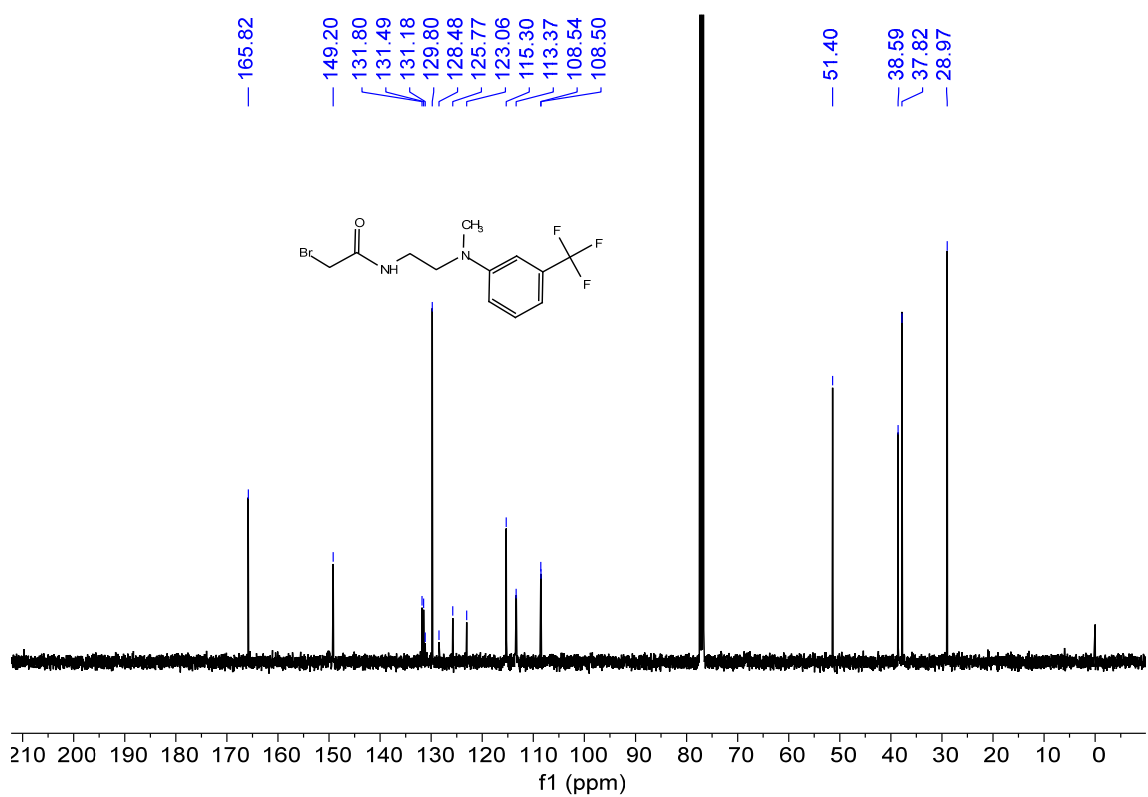

<sup>13</sup>C NMR spectrum of **1s**

$^{19}\text{F}$  NMR (376 MHz,  $\text{CDCl}_3$ )

-62.74

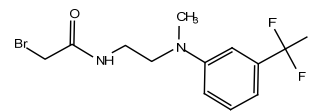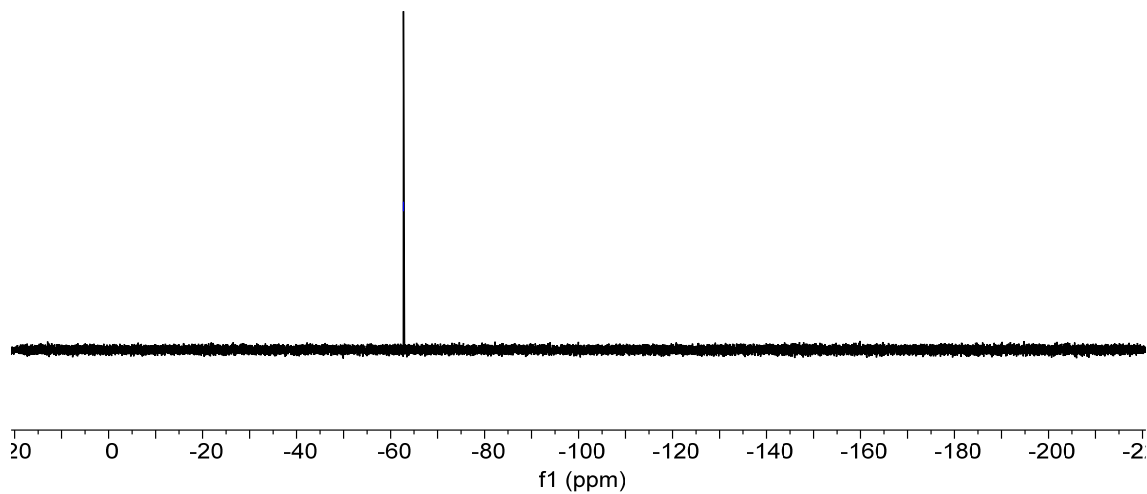

$^{19}\text{F}$  NMR spectrum of **1s**

$^1\text{H}$  NMR (400 MHz,  $\text{CDCl}_3$ )

-7.26

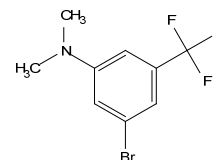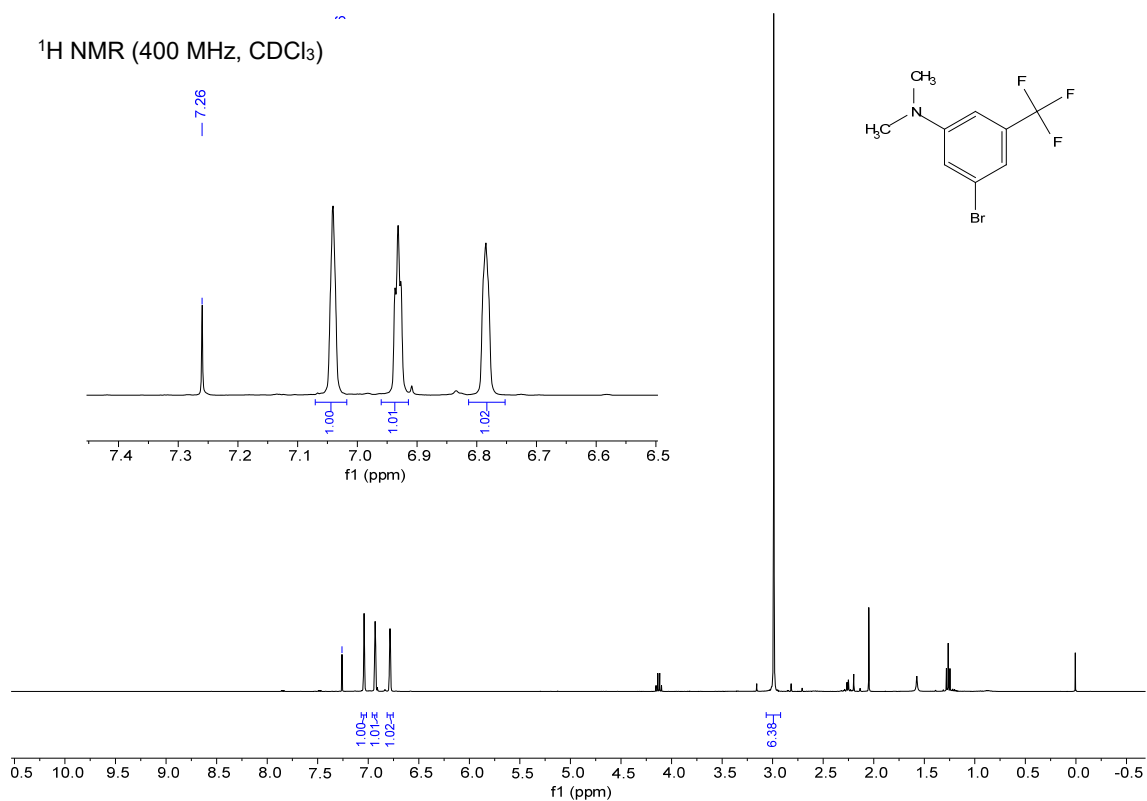

$^1\text{H}$  NMR spectrum of **1t**

$^{13}\text{C}$  NMR (101 MHz,  $\text{CDCl}_3$ )

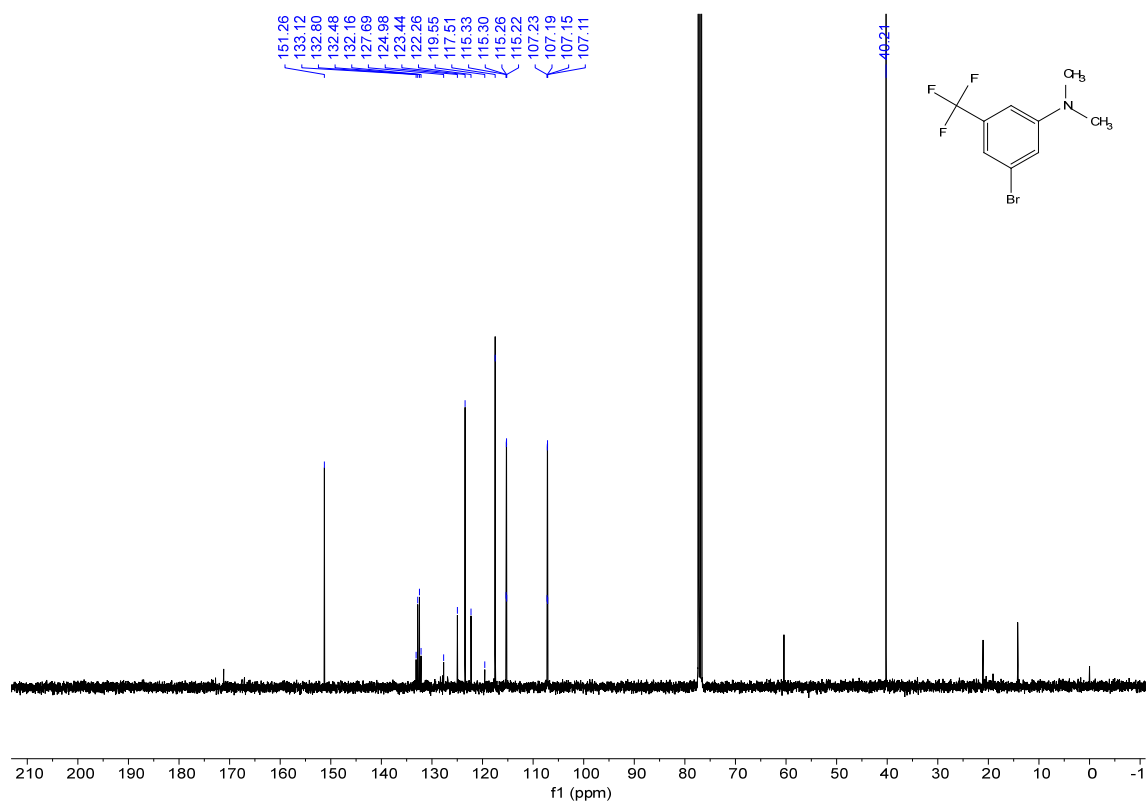

$^{13}\text{C}$  NMR spectrum of **1t**

$^{19}\text{F}$  NMR (376 MHz,  $\text{CDCl}_3$ )

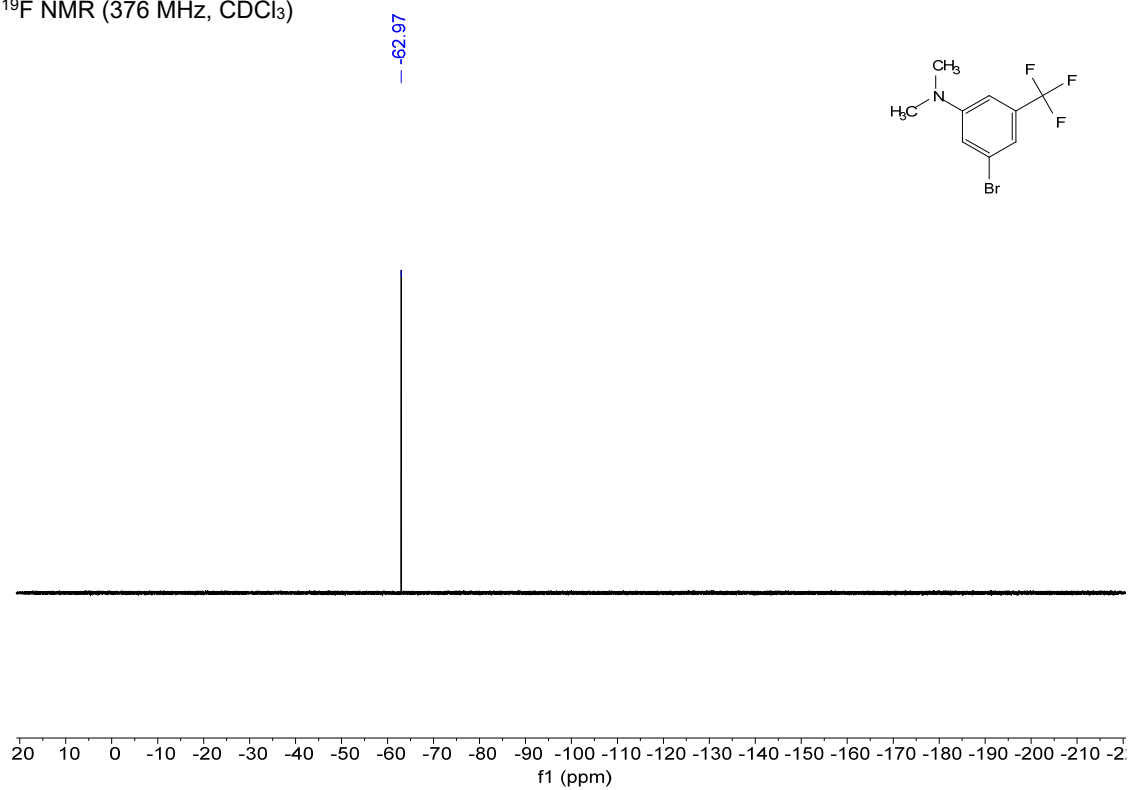

$^{19}\text{F}$  NMR spectrum of **1t**

<sup>1</sup>H NMR (400 MHz, CDCl<sub>3</sub>)

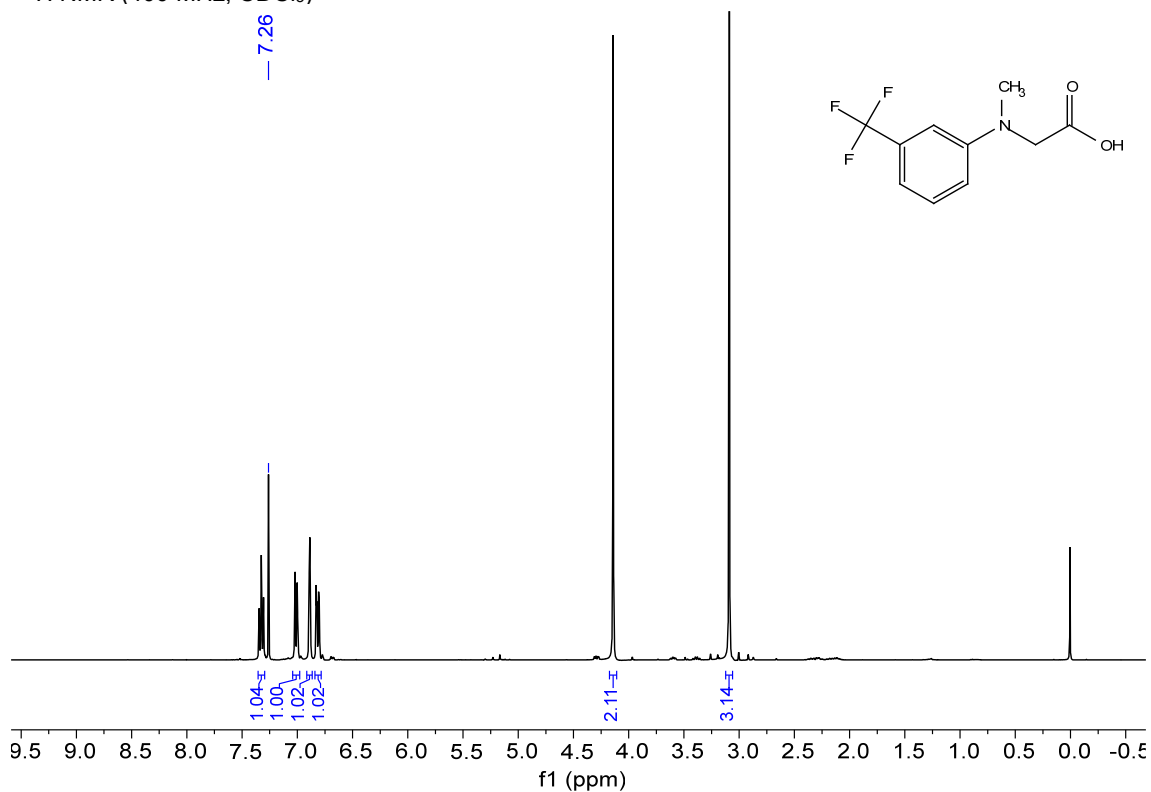

<sup>1</sup>H NMR spectrum of **1u**

<sup>13</sup>C NMR (101 MHz, CDCl<sub>3</sub>)

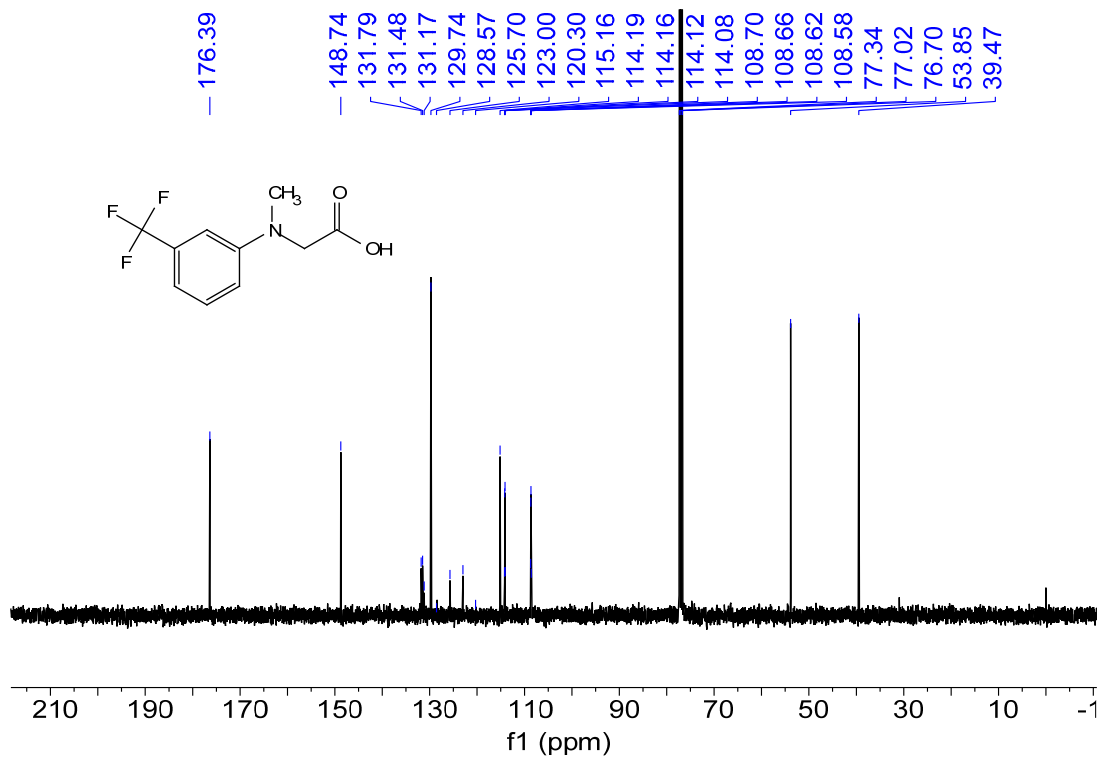

<sup>13</sup>C NMR spectrum of **1u**

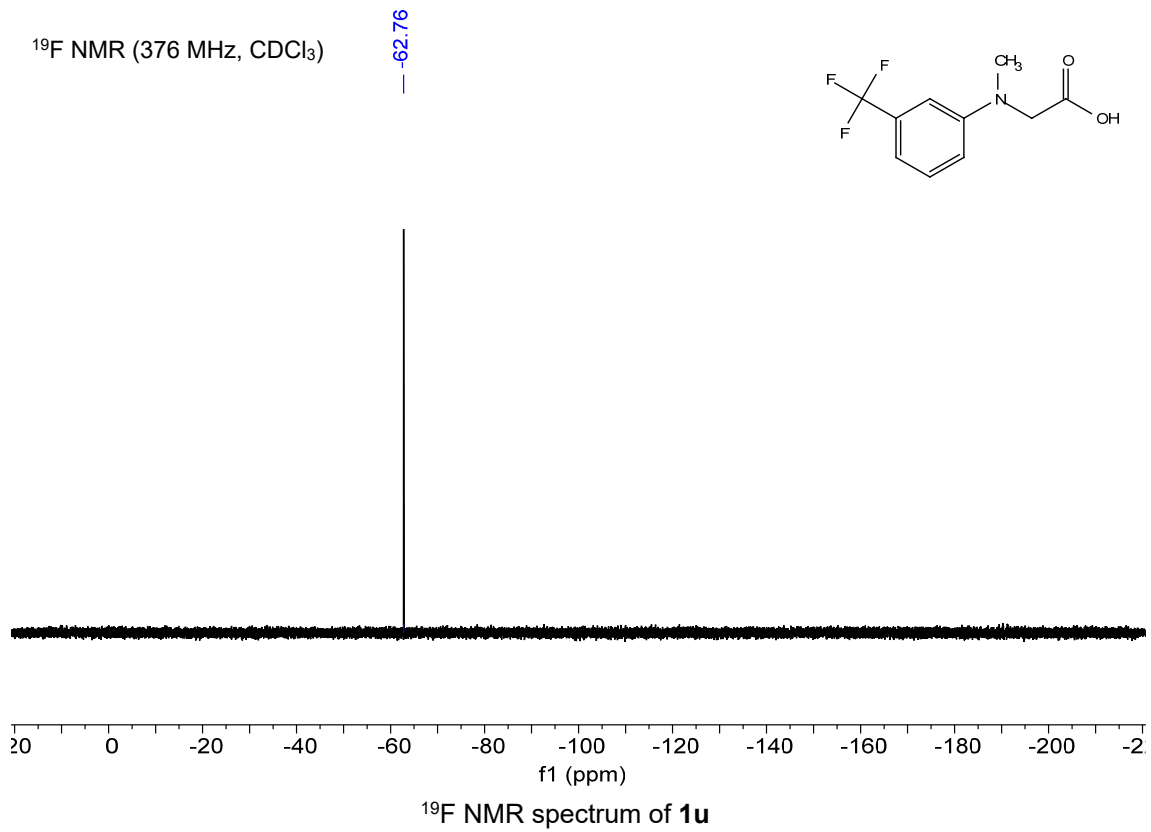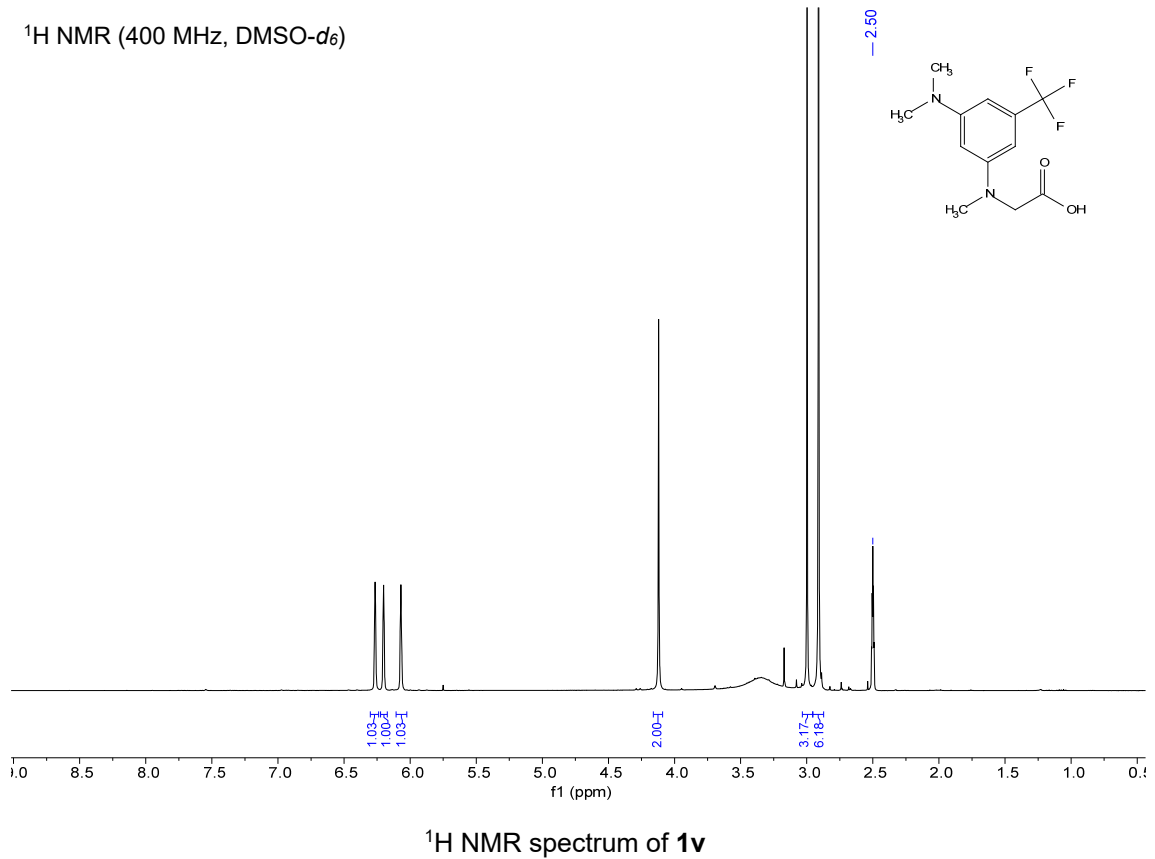



<sup>13</sup>C NMR (101 MHz, DMSO-d<sub>6</sub>)

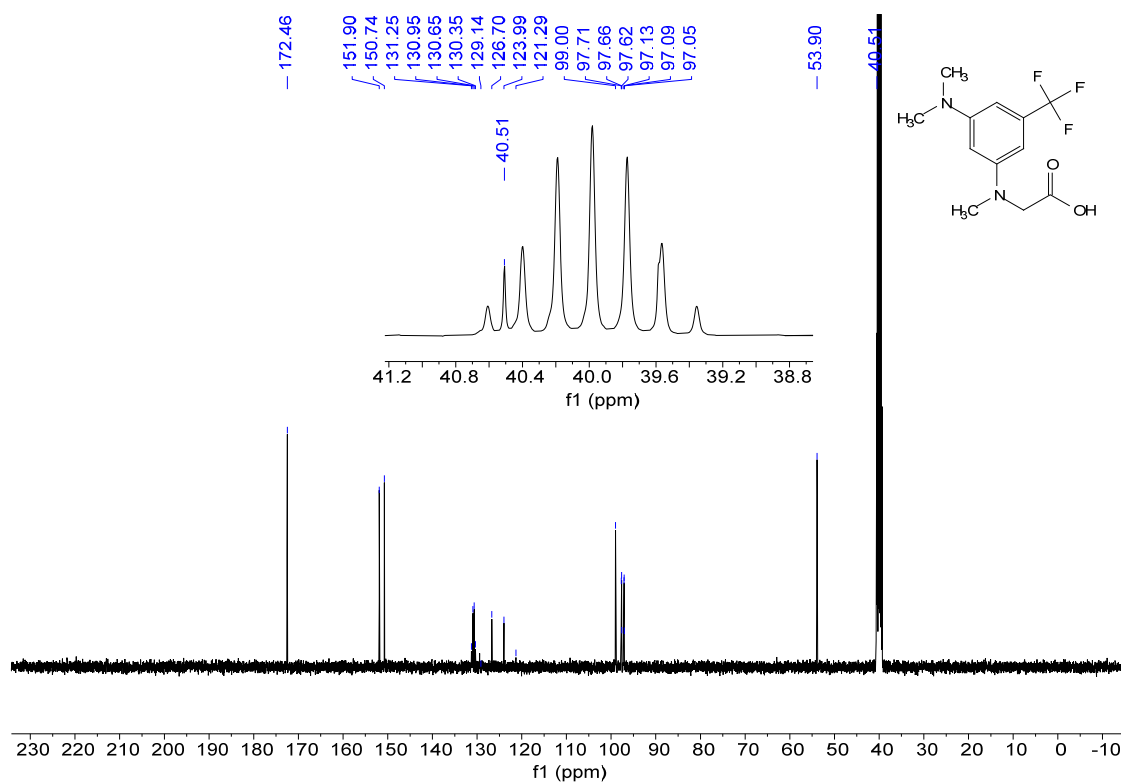

<sup>13</sup>C NMR spectrum of **1v**

<sup>19</sup>F NMR (376 MHz, CDCl<sub>3</sub>)

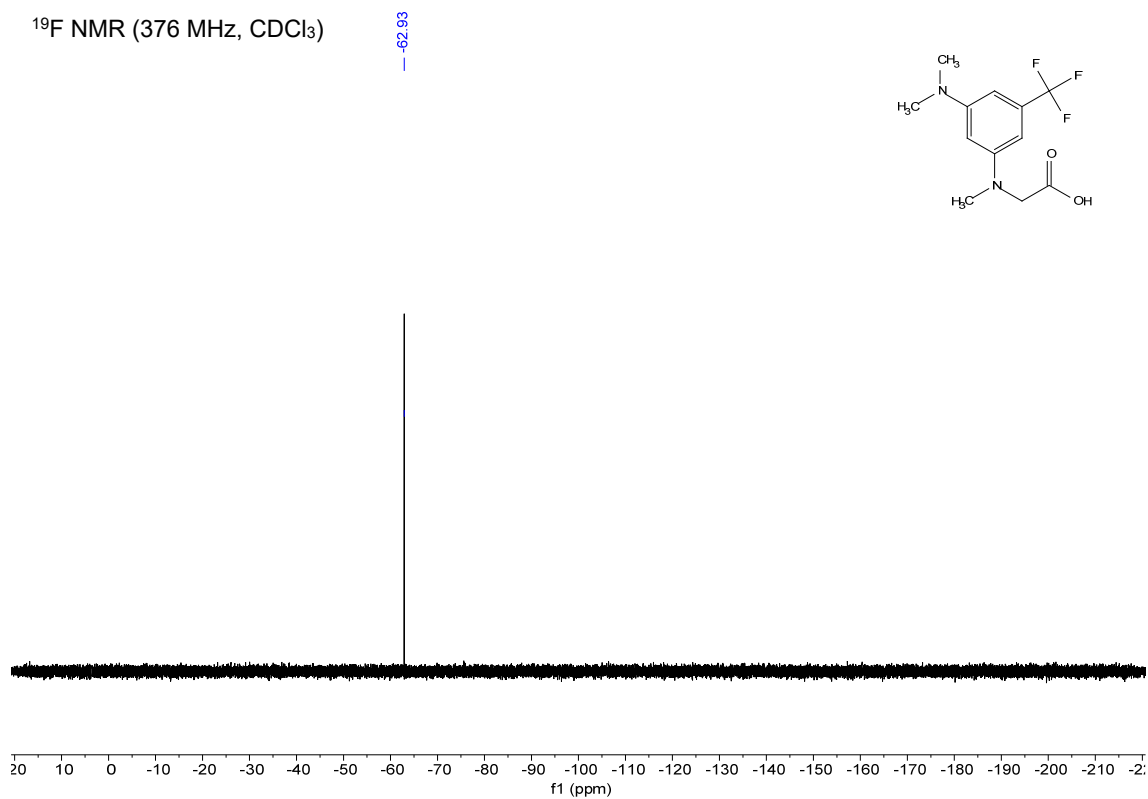

<sup>19</sup>F NMR spectrum of **1v**

<sup>1</sup>H NMR (400 MHz, CDCl<sub>3</sub>)

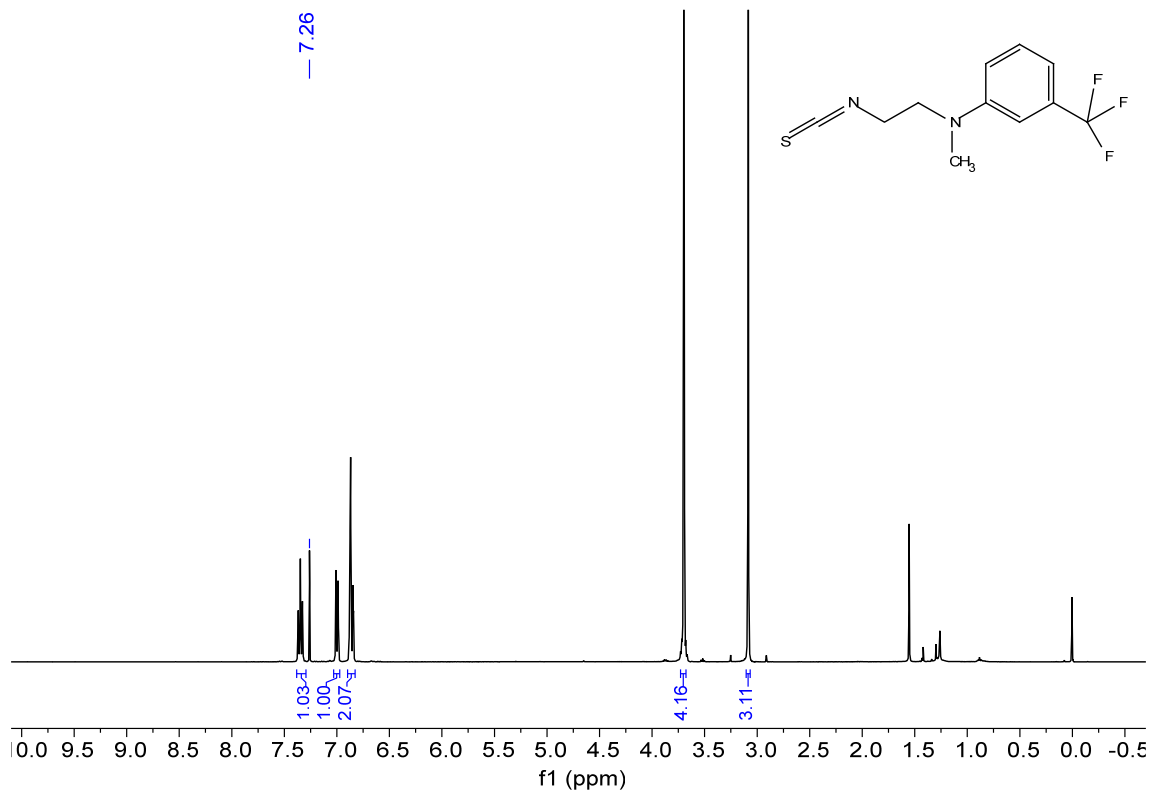

<sup>1</sup>H NMR spectrum of **1w**

<sup>13</sup>C NMR (101 MHz, CDCl<sub>3</sub>)

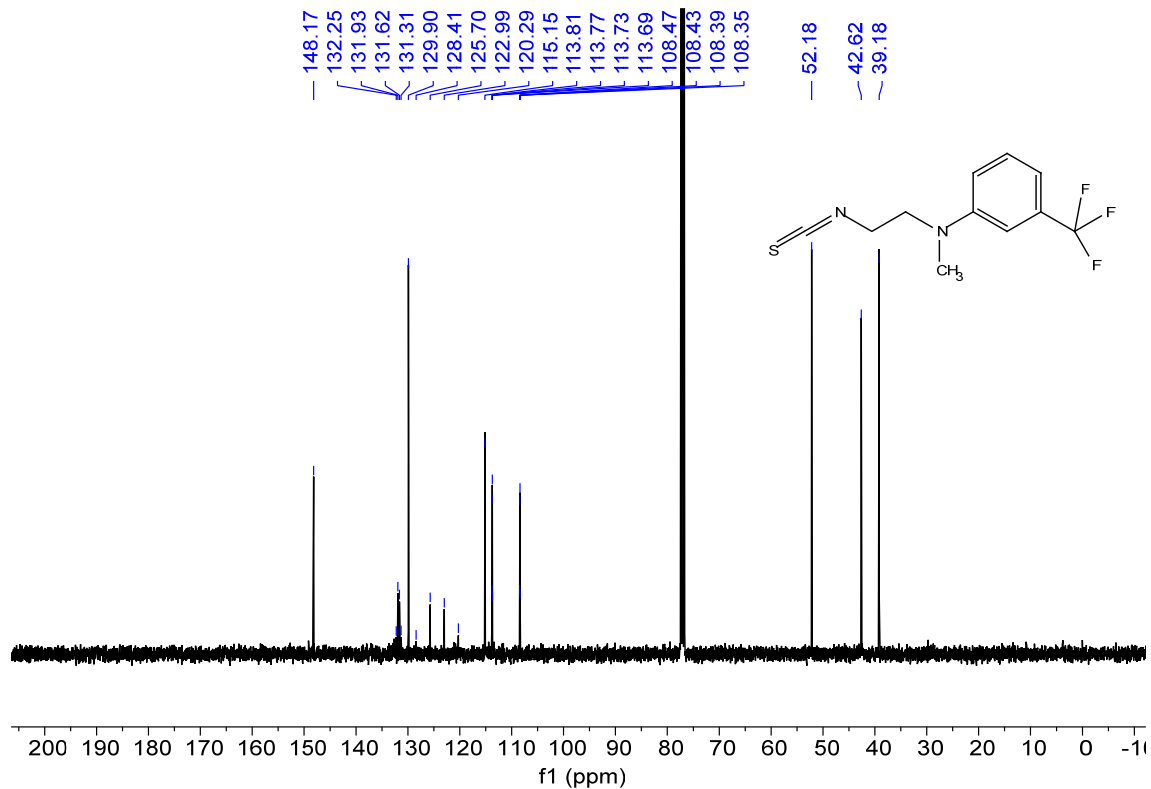

<sup>13</sup>C NMR spectrum of **1w**

$^{19}\text{F}$  NMR (376 MHz,  $\text{CDCl}_3$ )

-62.75

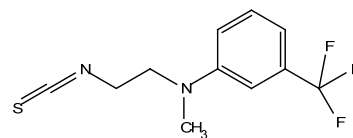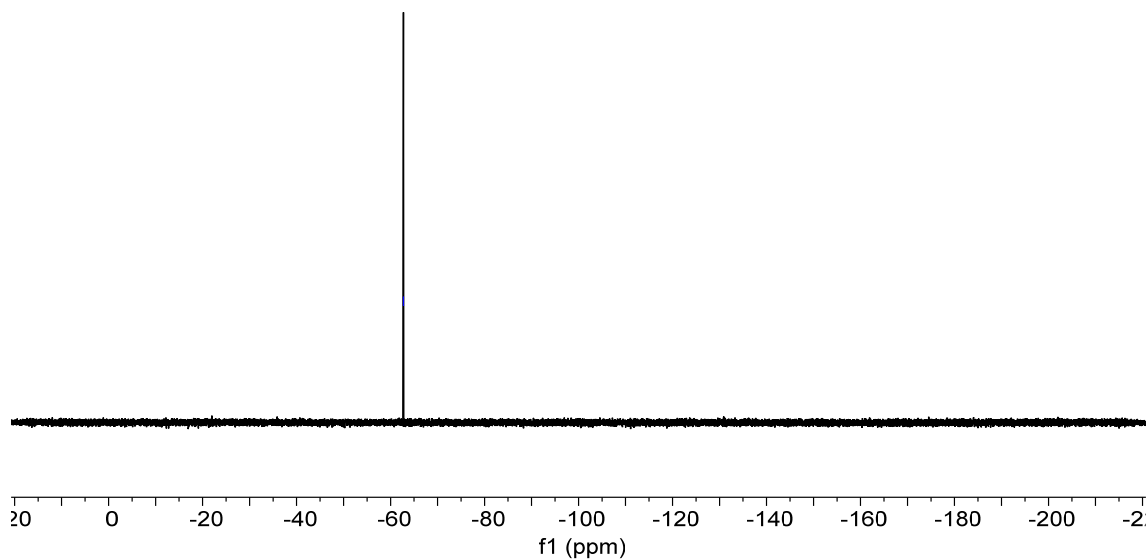

$^{19}\text{F}$  NMR spectrum of **1w**

$^1\text{H}$  NMR (400 MHz,  $\text{CDCl}_3$ )

-7.26

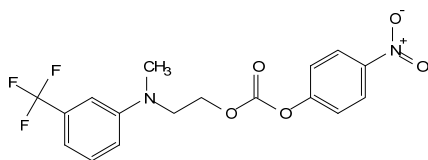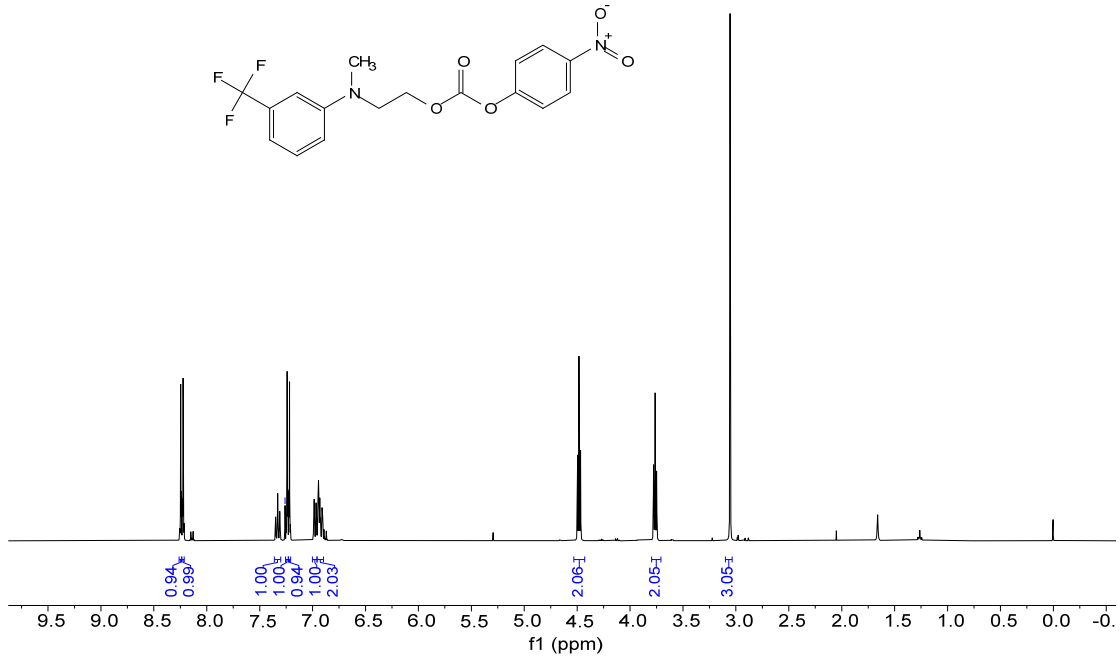

$^1\text{H}$  NMR spectrum of **1y**

<sup>13</sup>C NMR (101 MHz, CDCl<sub>3</sub>)

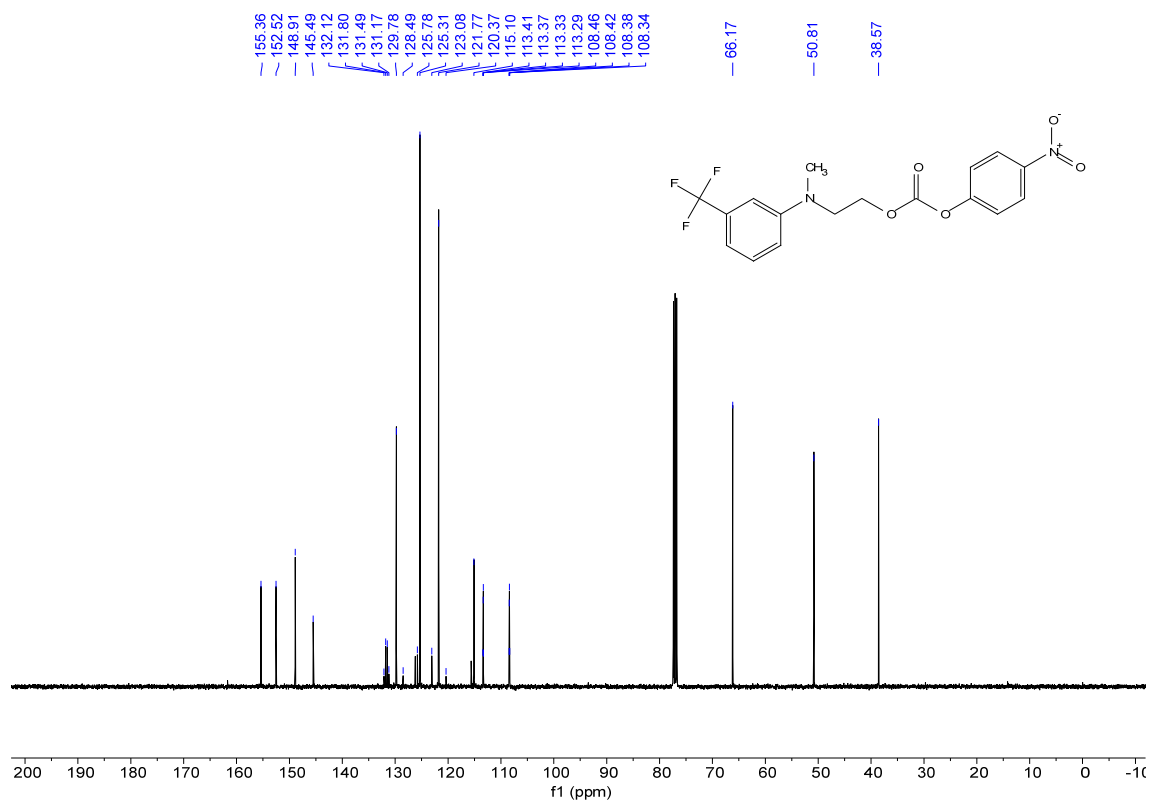

<sup>13</sup>C NMR spectrum of **1y**

<sup>19</sup>F NMR (376 MHz, CDCl<sub>3</sub>)

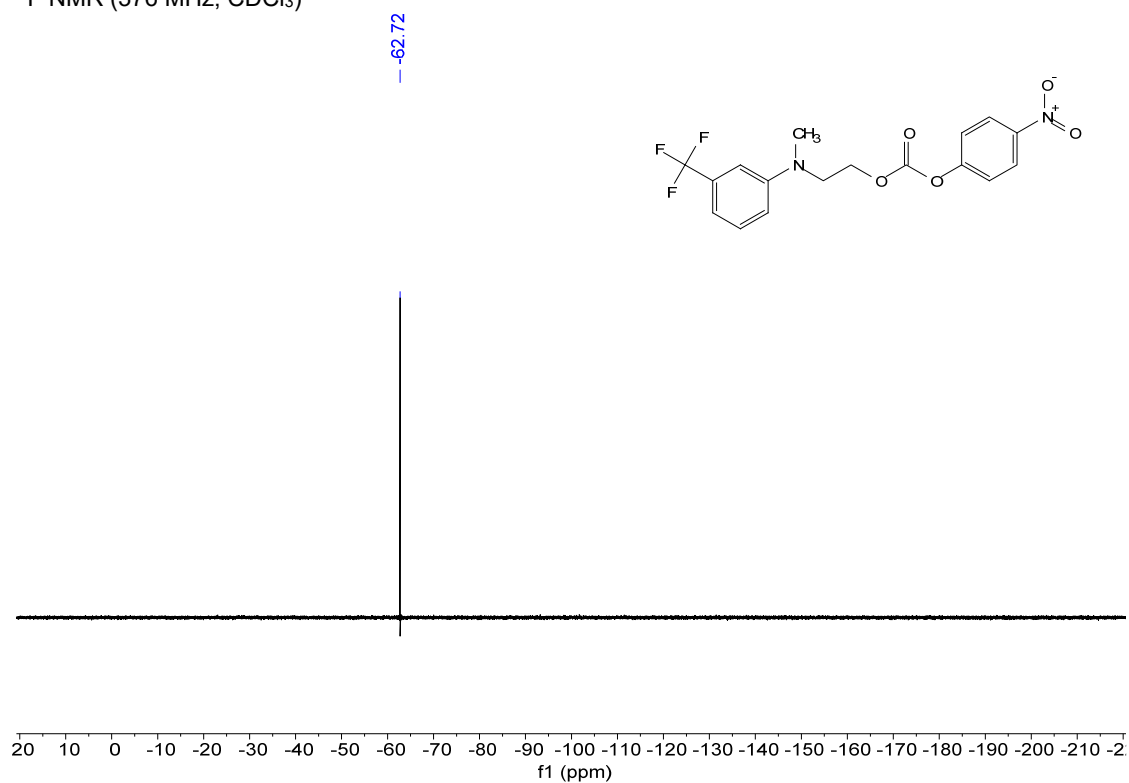

<sup>19</sup>F NMR spectrum of **1y**

$^1\text{H}$  NMR (400 MHz,  $\text{CDCl}_3$ )

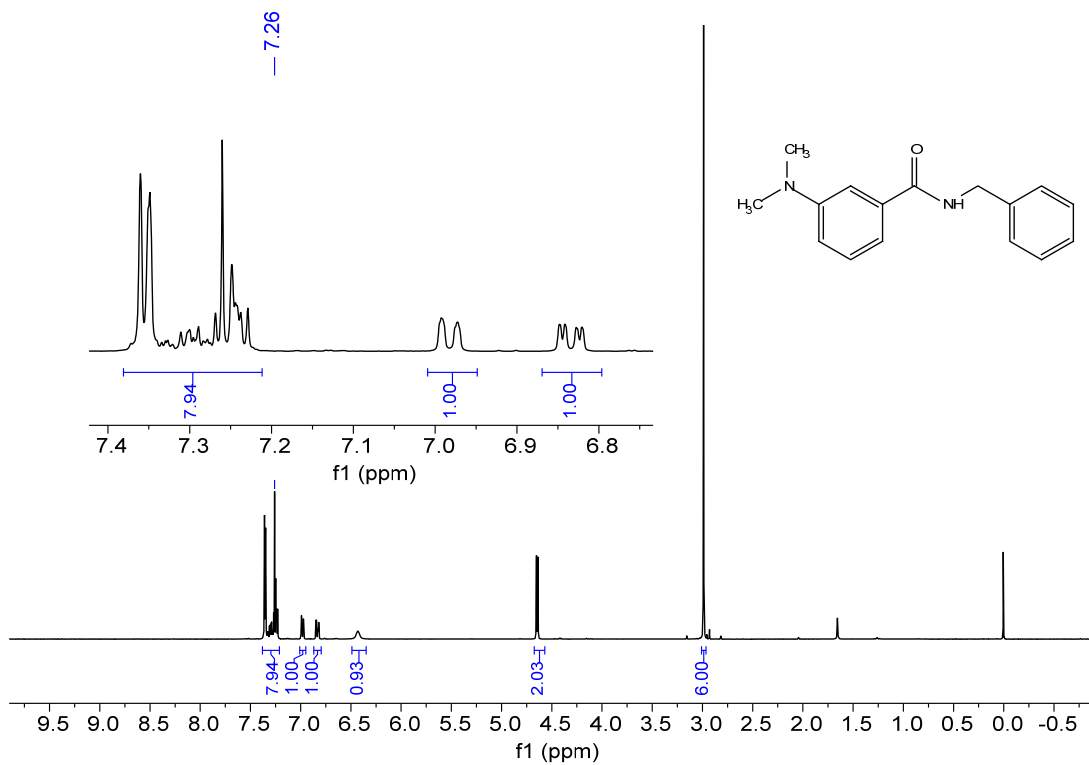

$^1\text{H}$  NMR spectrum of **3aa**

$^{13}\text{C}$  NMR (101 MHz,  $\text{CDCl}_3$ )

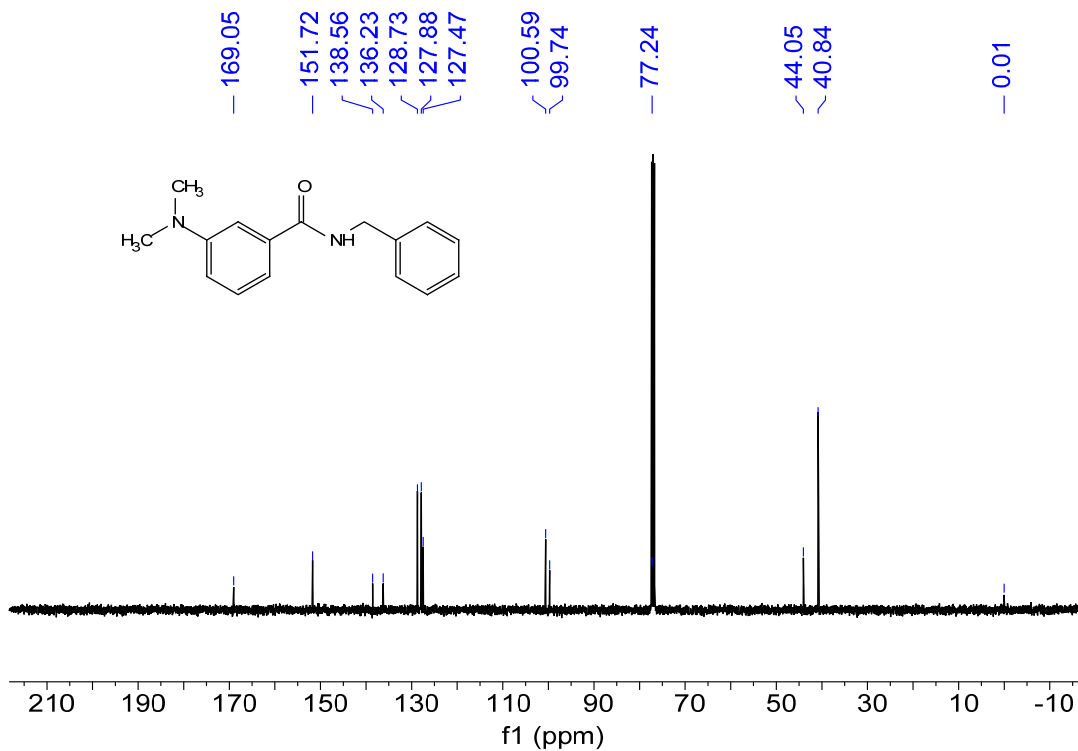

$^{13}\text{C}$  NMR spectrum of **3aa**

$^1\text{H}$  NMR (400 MHz,  $\text{CDCl}_3$ )

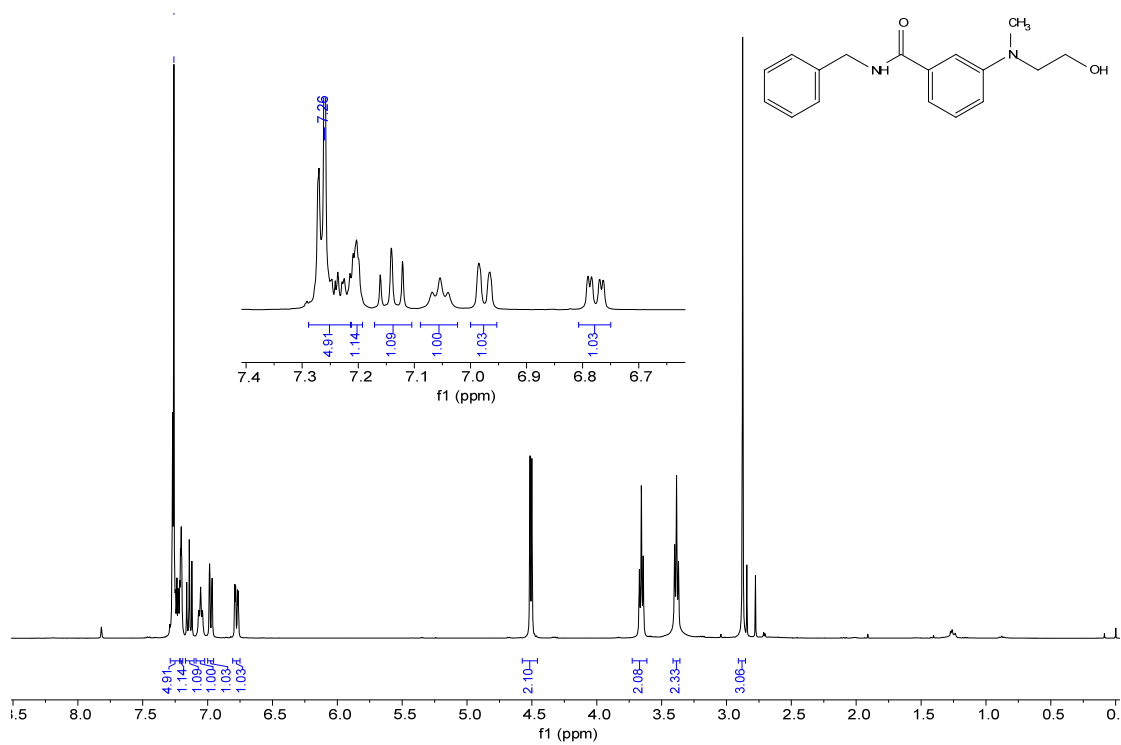

$^{13}\text{C}$  NMR (101 MHz,  $\text{CDCl}_3$ )

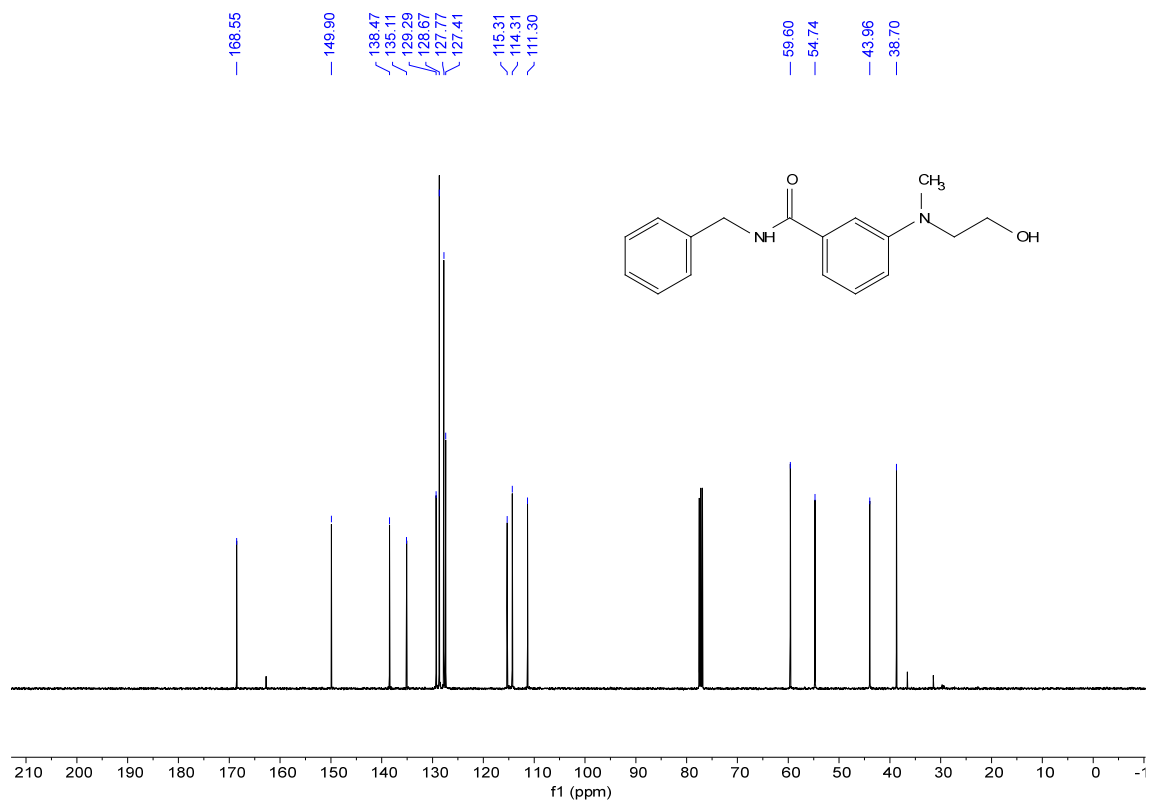

$^1\text{H}$  NMR and  $^{13}\text{C}$  NMR spectrum of **3ba**

$^1\text{H}$  NMR (400 MHz,  $\text{CDCl}_3$ )

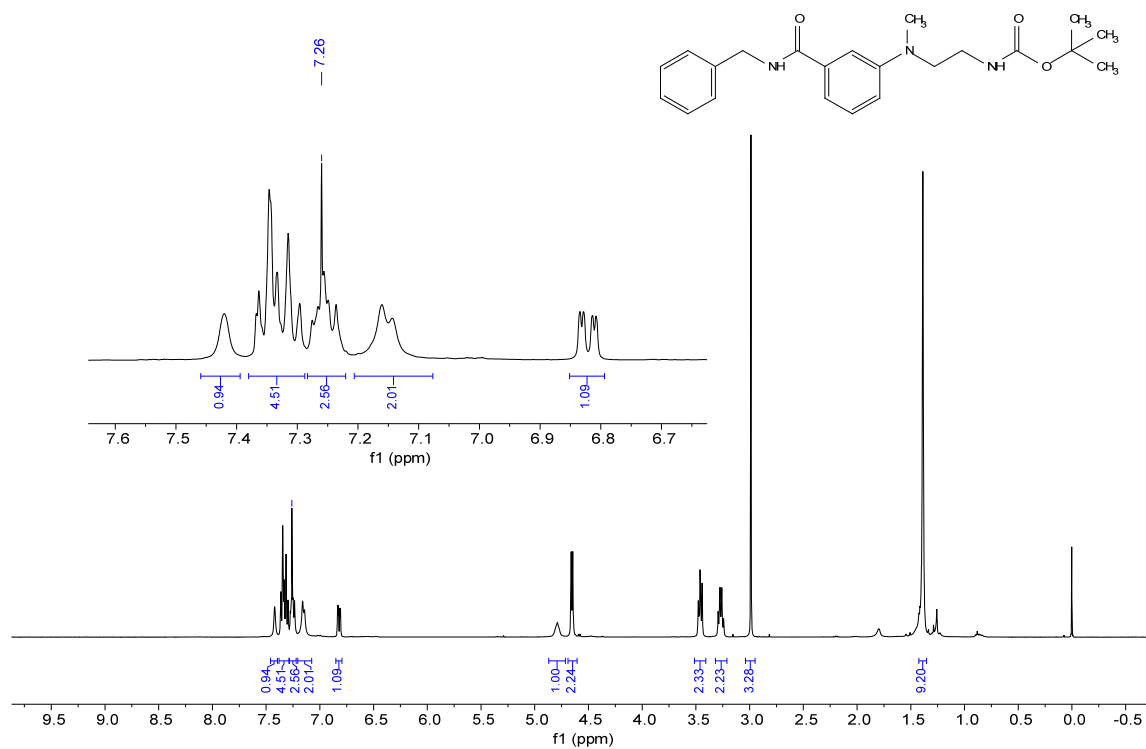

$^{13}\text{C}$  NMR (101 MHz,  $\text{CDCl}_3$ )

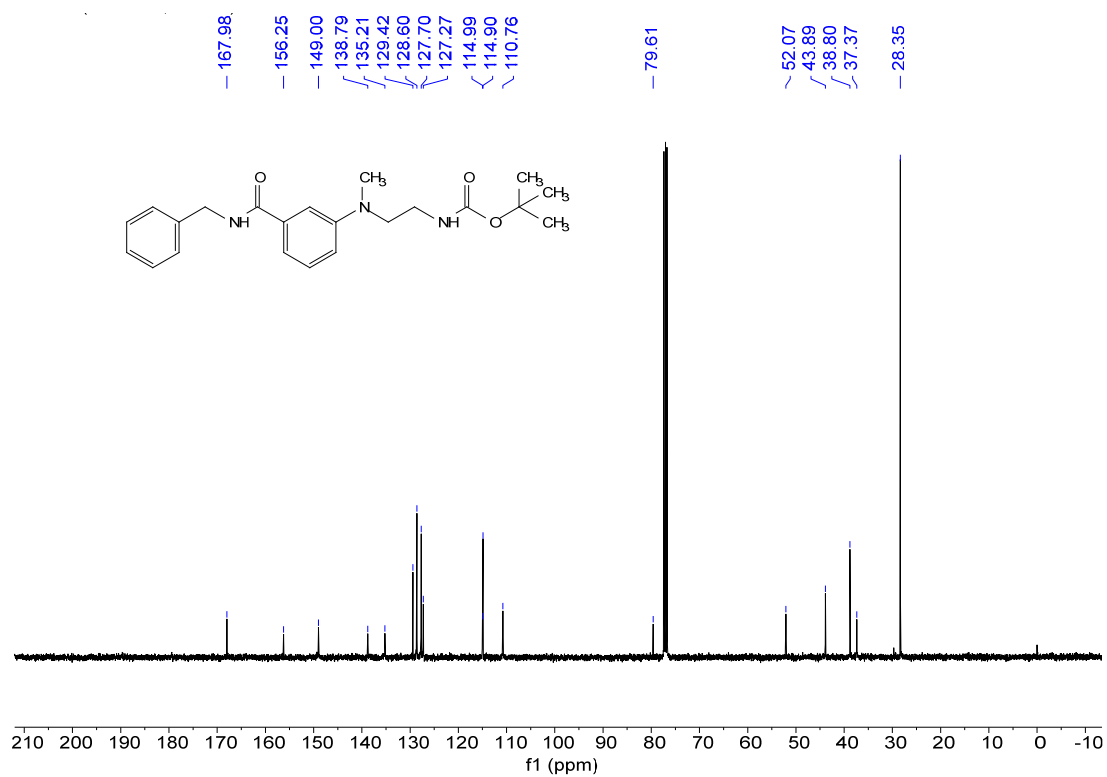

$^1\text{H}$  NMR and  $^{13}\text{C}$  NMR spectrum of **3ca**

<sup>1</sup>H NMR (400 MHz, CDCl<sub>3</sub>)

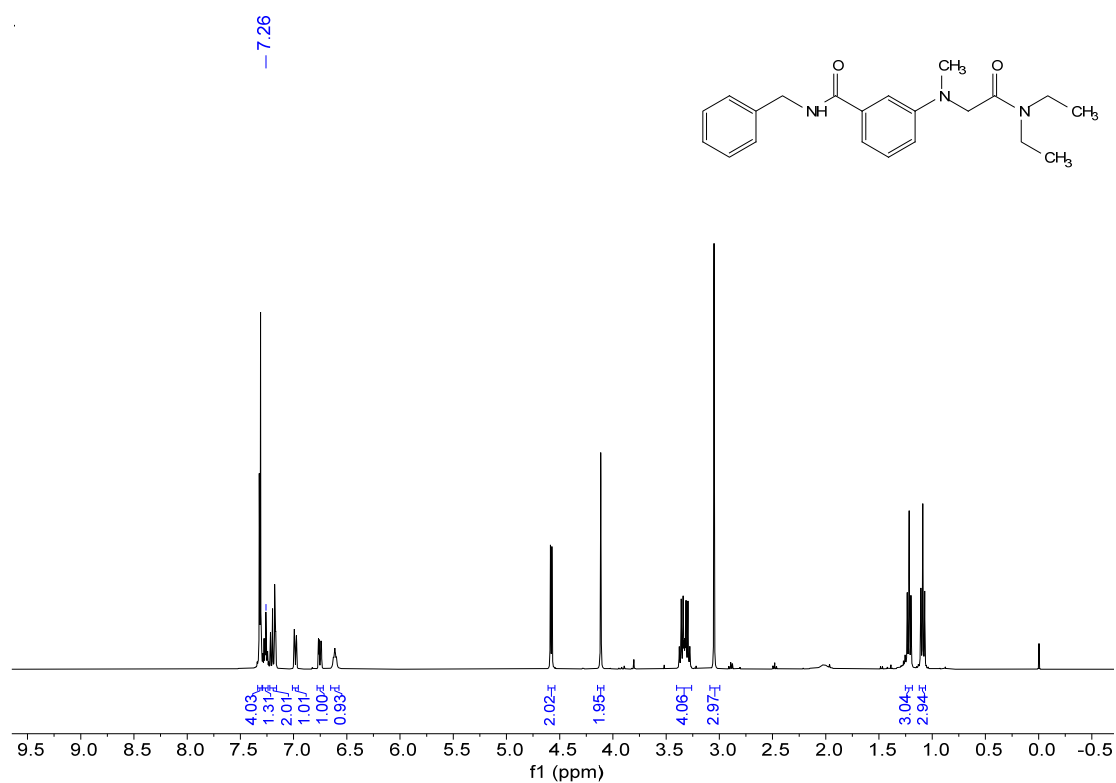

<sup>13</sup>C NMR (101 MHz, CDCl<sub>3</sub>)

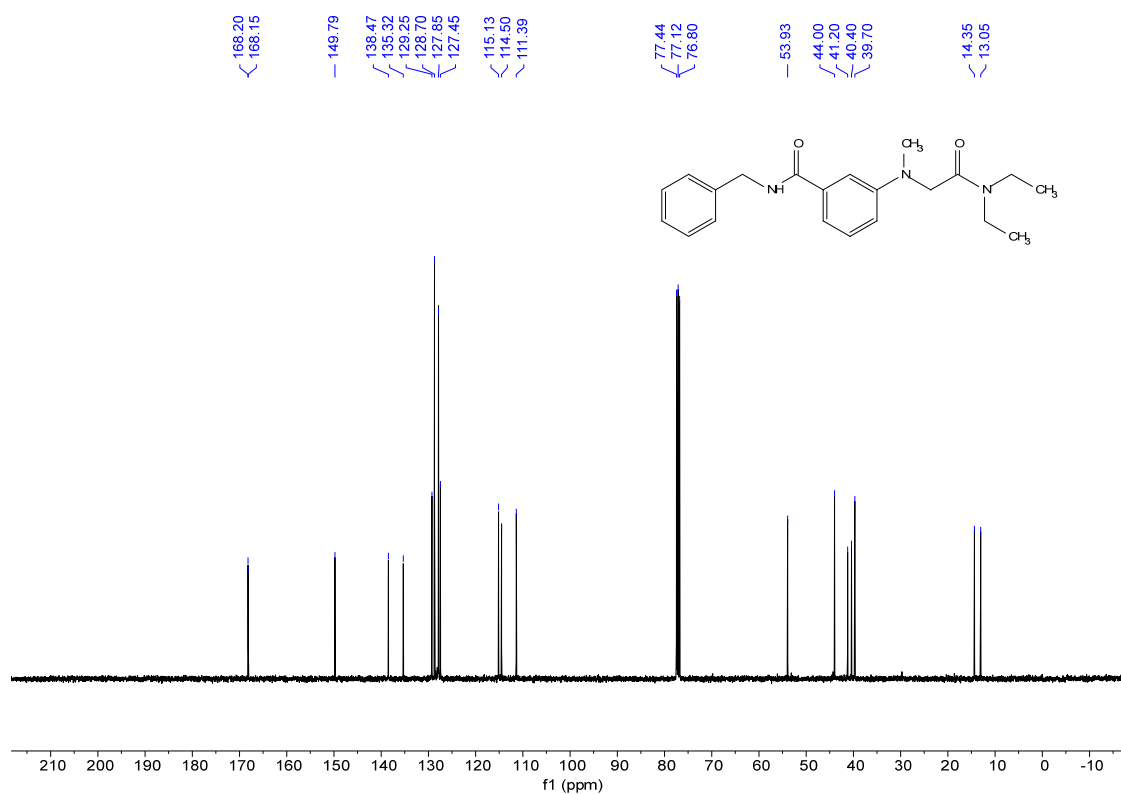

<sup>1</sup>H NMR and <sup>13</sup>C NMR spectrum of **3da**



<sup>1</sup>H NMR (400 MHz, CDCl<sub>3</sub>)

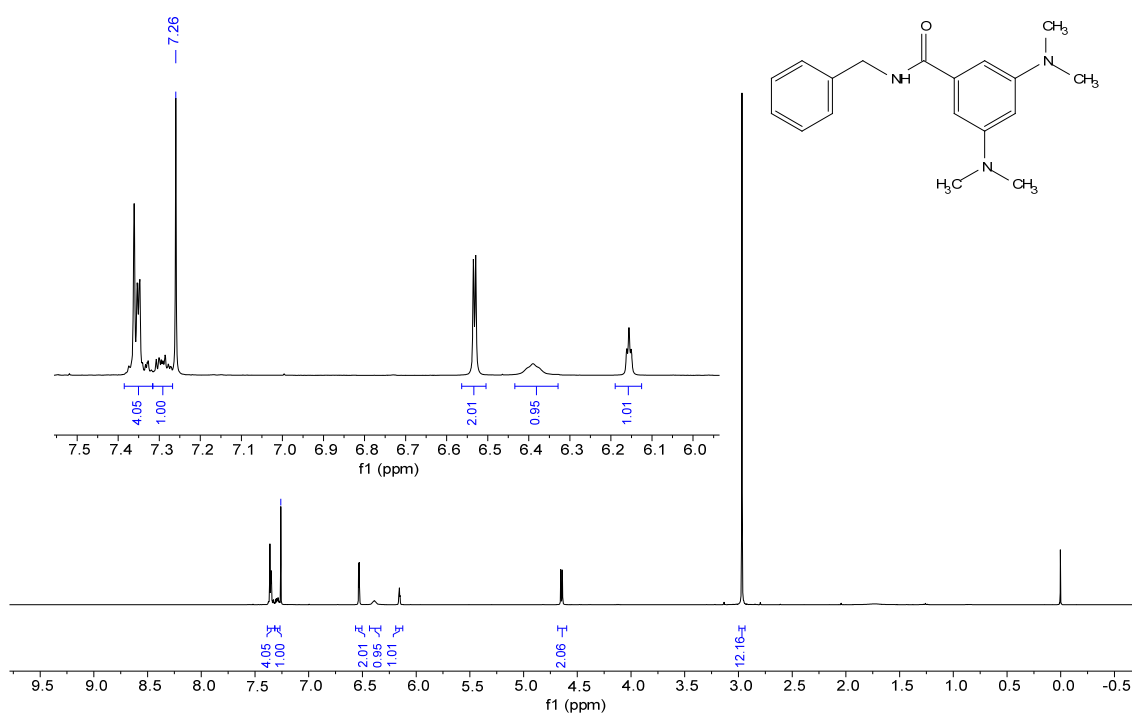

<sup>13</sup>C NMR (101 MHz, CDCl<sub>3</sub>)

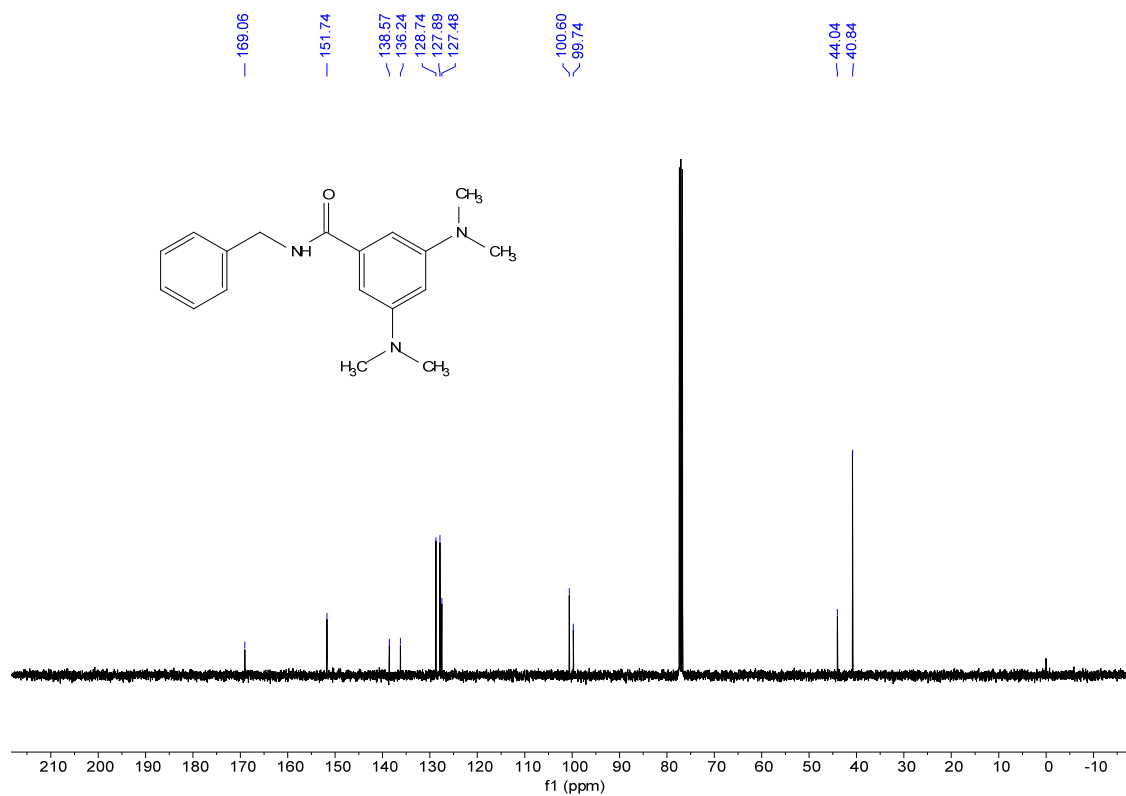

<sup>1</sup>H NMR and <sup>13</sup>C NMR spectrum of 3ea

<sup>1</sup>H NMR (400 MHz, CDCl<sub>3</sub>)

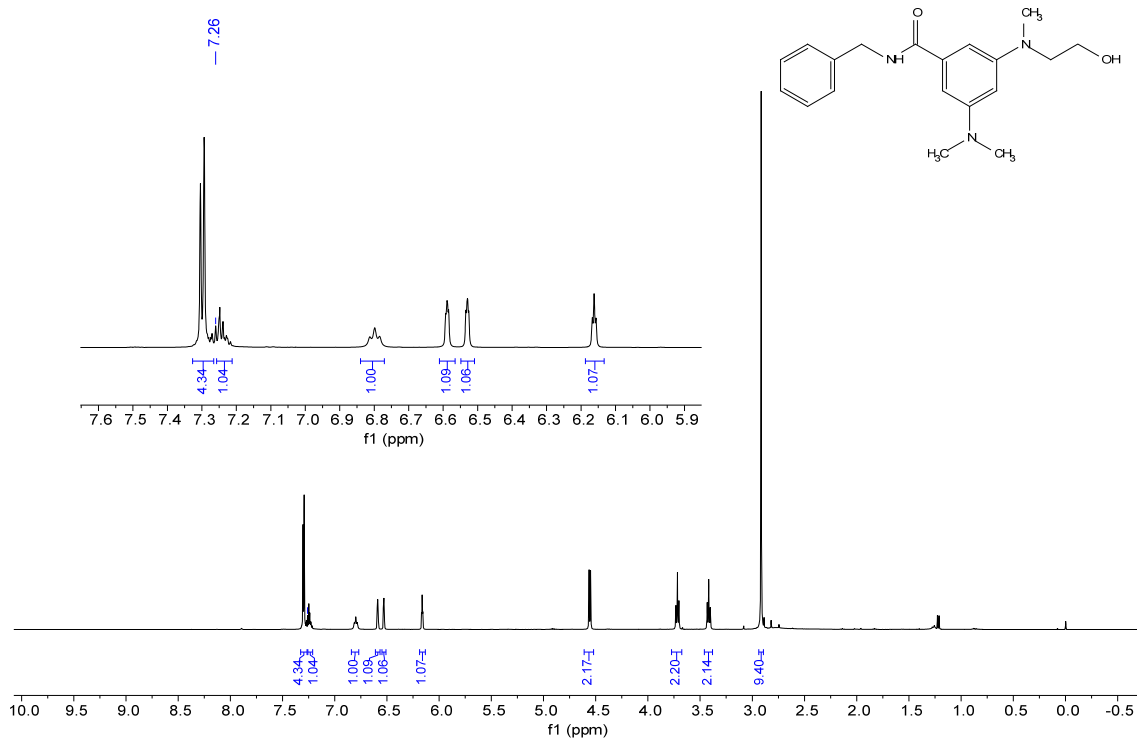

<sup>13</sup>C NMR (101 MHz, CDCl<sub>3</sub>)

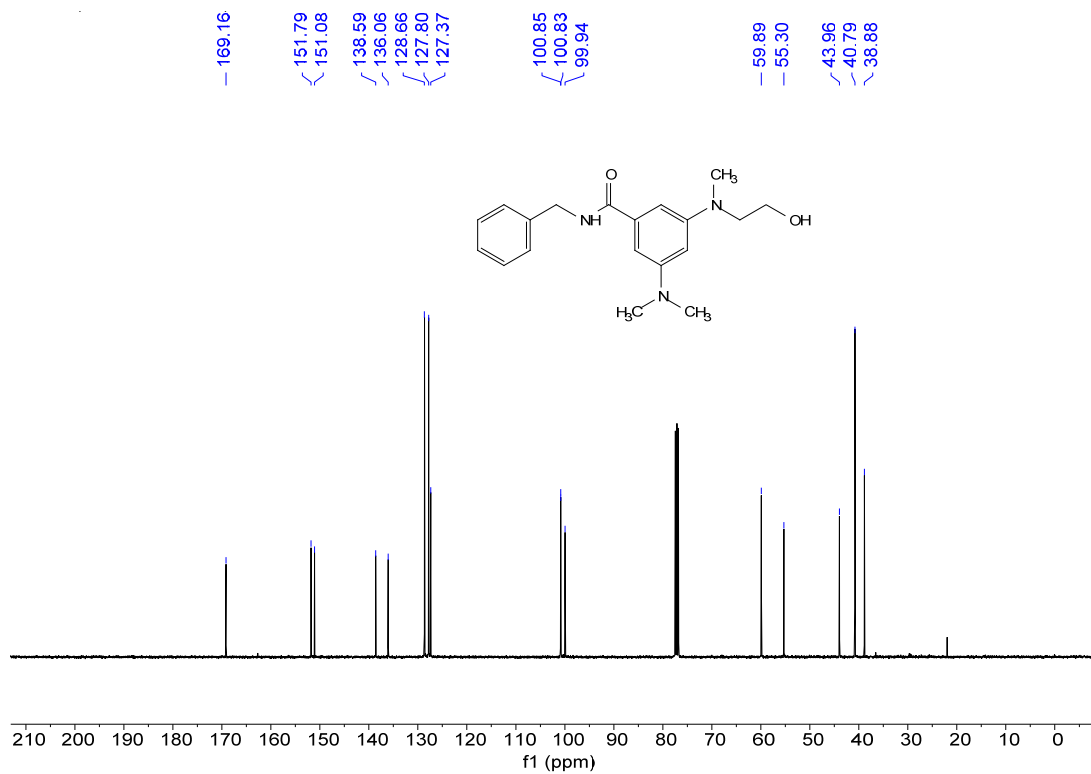

<sup>1</sup>H NMR and <sup>13</sup>C NMR spectrum of **3fa**



$^1\text{H}$  NMR (400 MHz,  $\text{CDCl}_3$ )

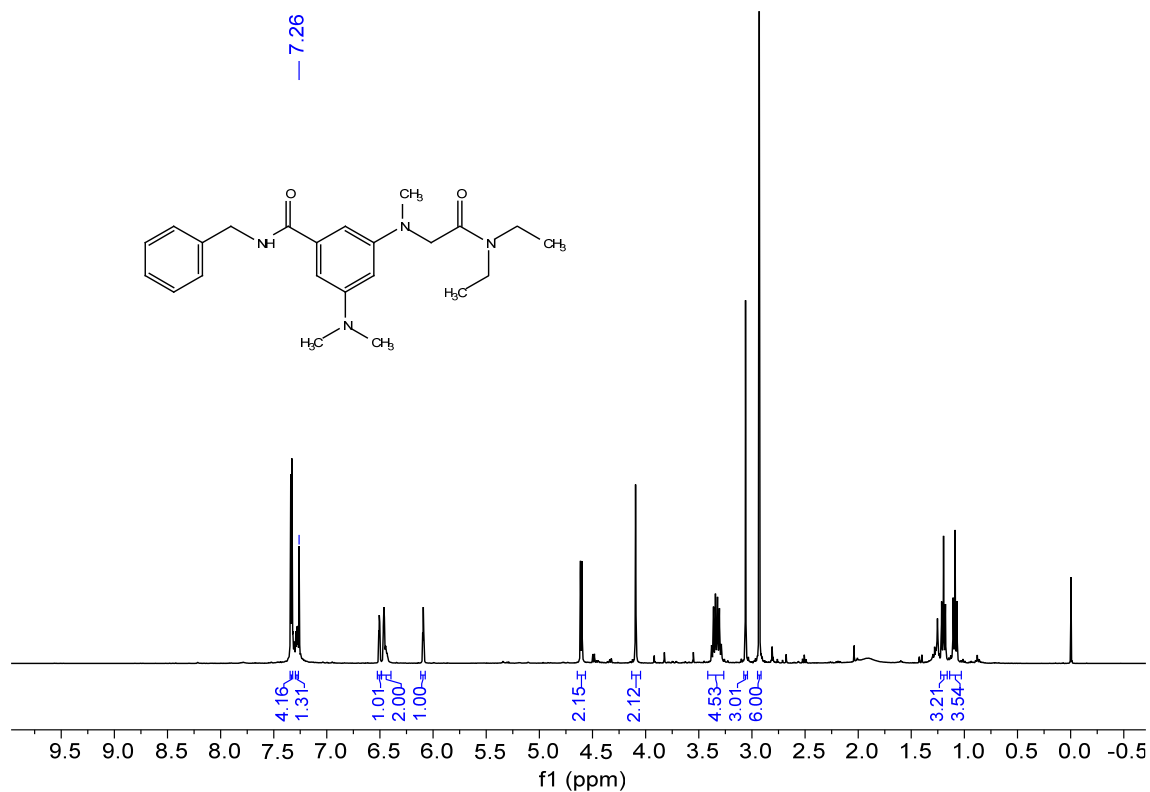

$^{13}\text{C}$  NMR (101 MHz,  $\text{CDCl}_3$ )

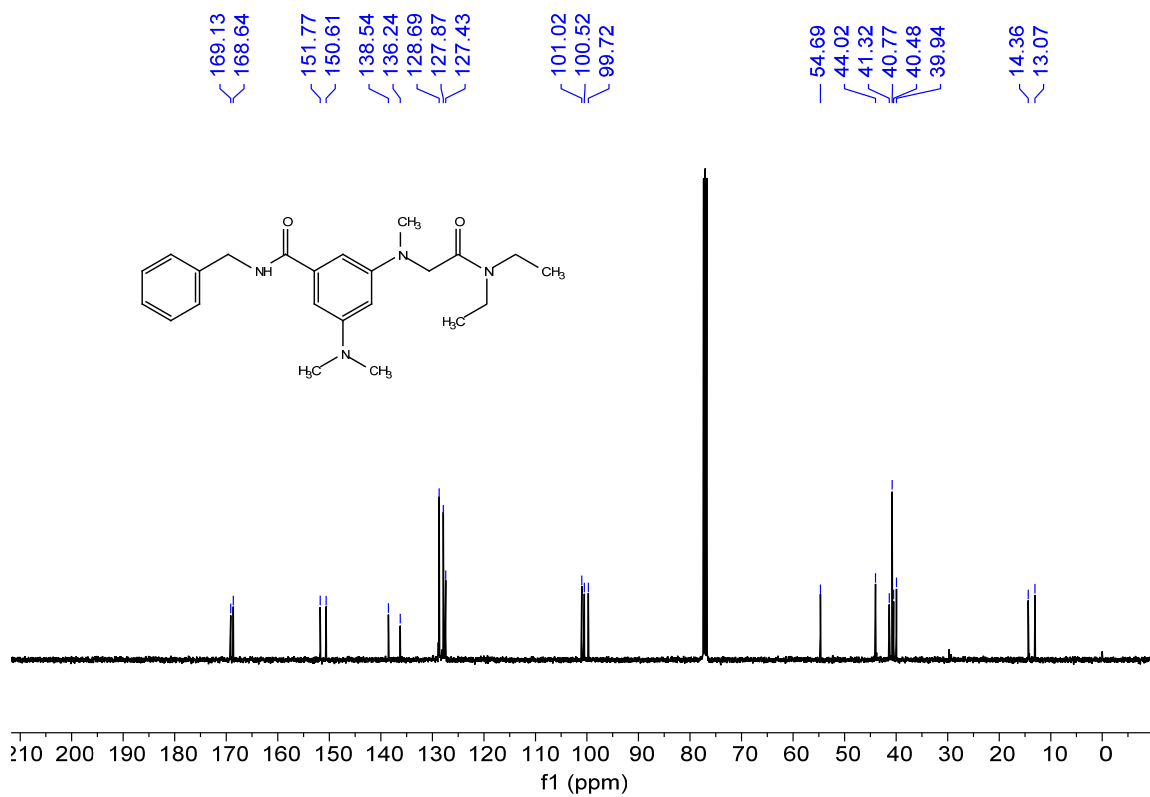

$^1\text{H}$  NMR and  $^{13}\text{C}$  NMR spectrum of **3ha**

<sup>1</sup>H NMR (400 MHz, DMSO-d<sub>6</sub>)

— 2.5C

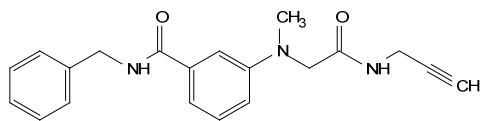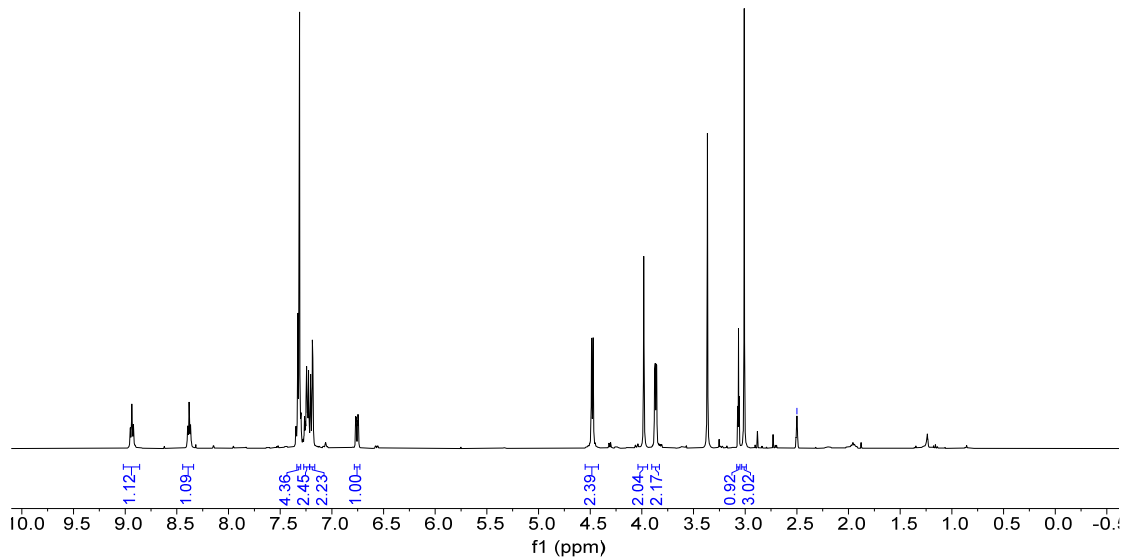

<sup>13</sup>C NMR (101 MHz, DMSO-d<sub>6</sub>)

— 169.95  
— 167.21  
— 149.65  
— 140.34  
— 135.51  
— 129.24  
— 128.73  
— 127.60  
— 127.15  
— 115.88  
— 115.01  
— 111.29  
— 81.63  
— 73.29  
— 55.83  
— 43.03  
— 39.74  
— 28.34

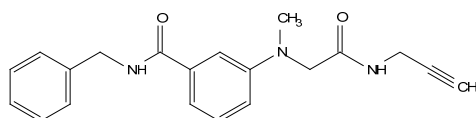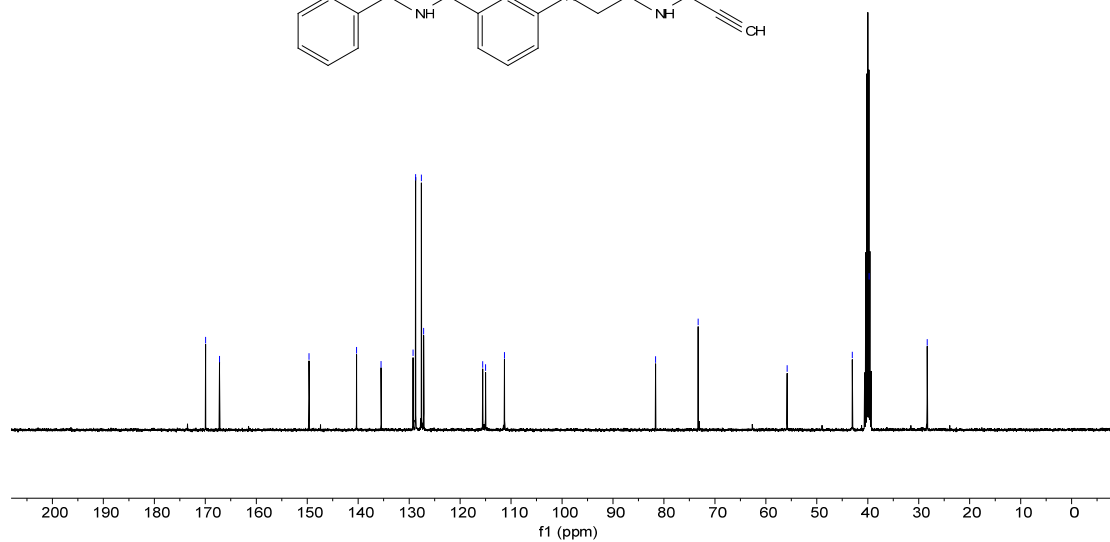

<sup>1</sup>H NMR and <sup>13</sup>C NMR spectrum of 3ja

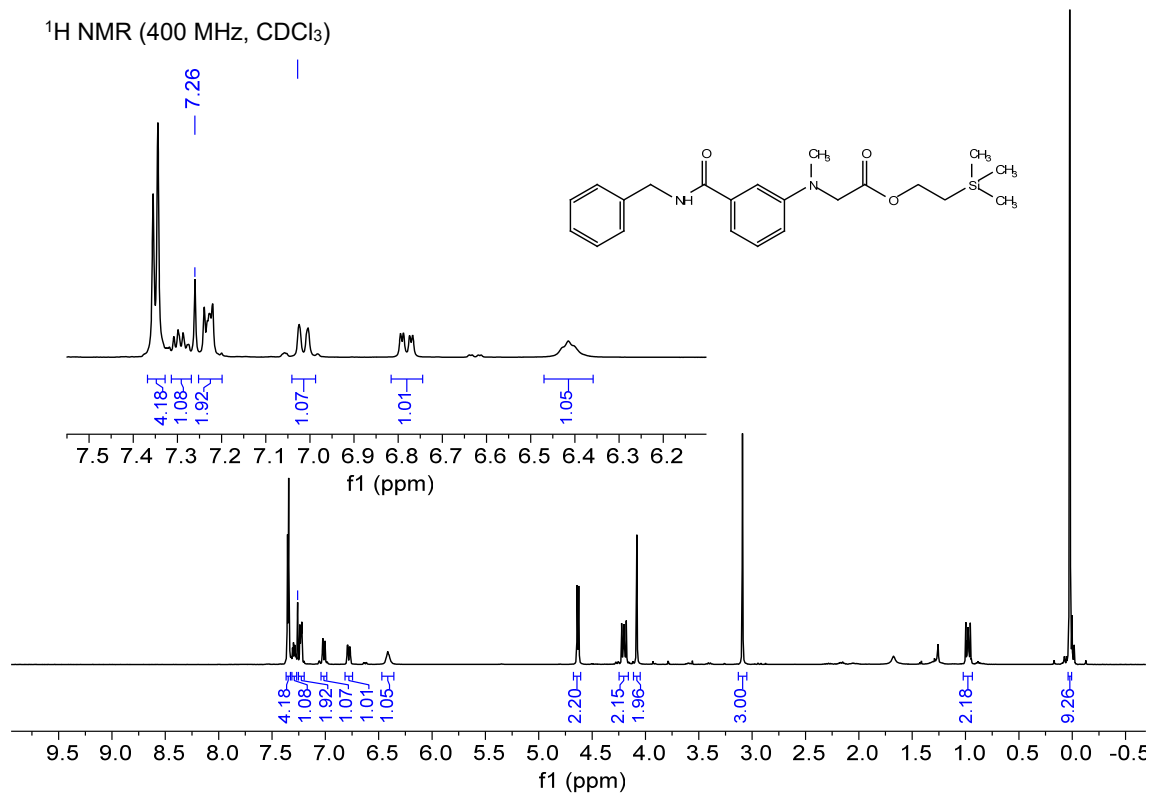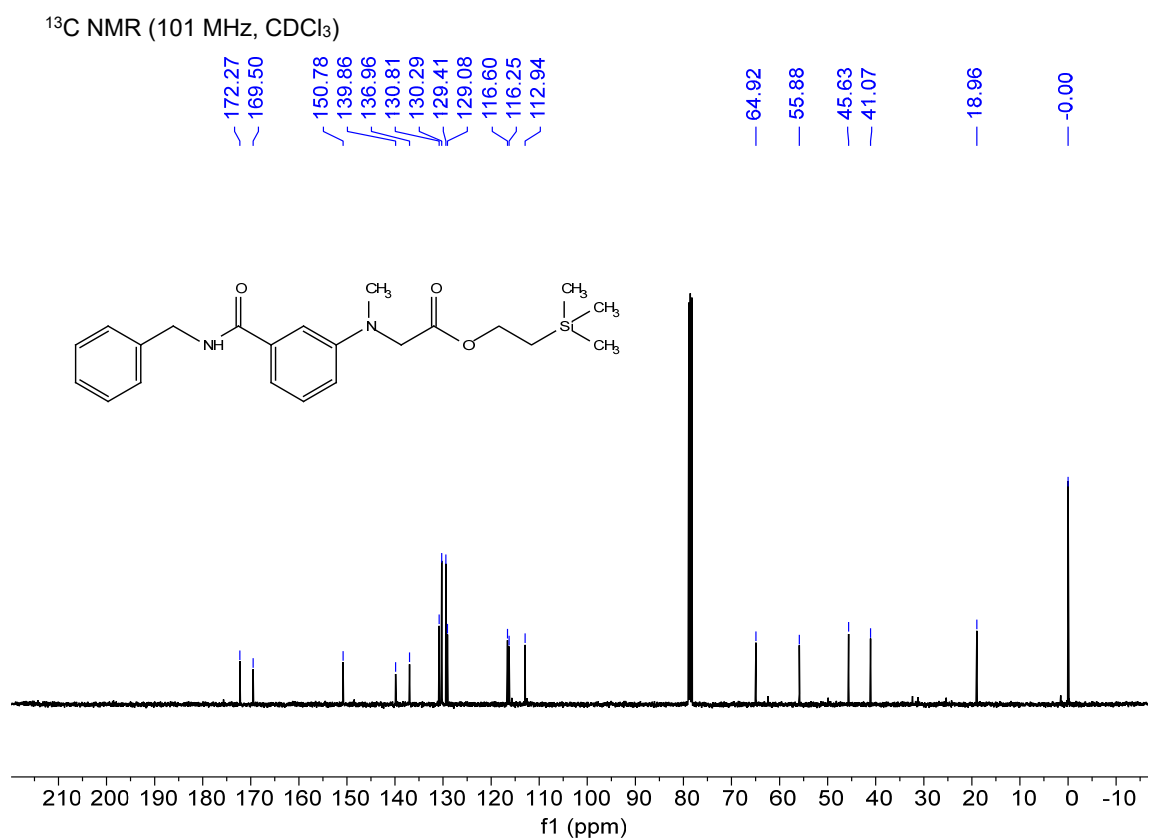

<sup>1</sup>H NMR and <sup>13</sup>C NMR spectrum of **3ka**

$^1\text{H}$  NMR (400 MHz,  $\text{DMSO-}d_6$ )

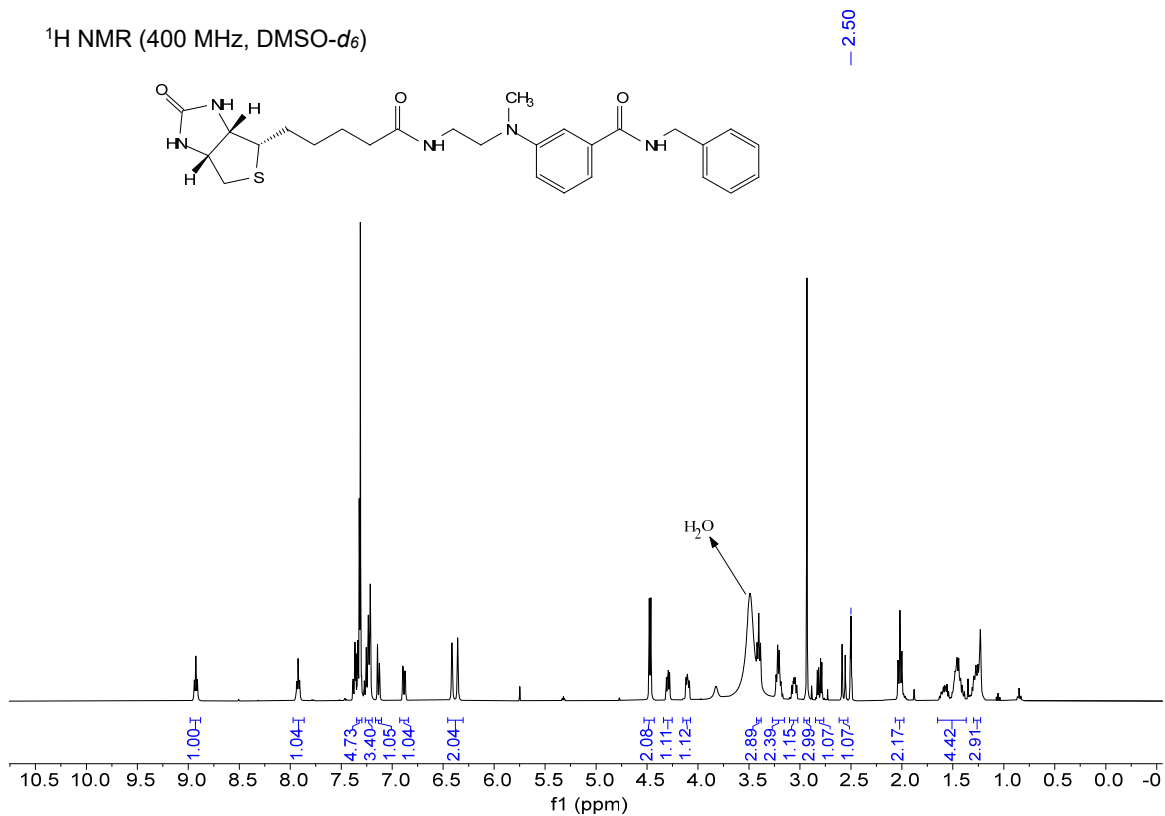

$^{13}\text{C}$  NMR (101 MHz,  $\text{DMSO-}d_6$ )

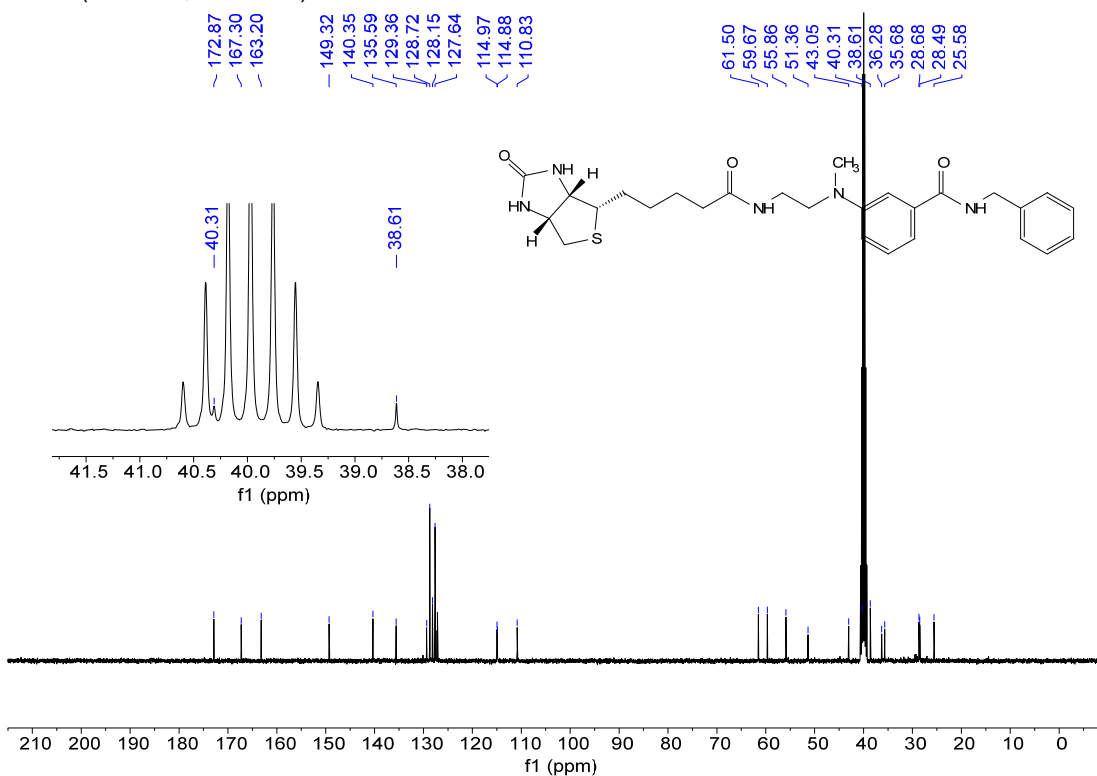

$^1\text{H}$  NMR and  $^{13}\text{C}$  NMR spectrum of **31a**

<sup>1</sup>H NMR (400 MHz, DMSO-*d*<sub>6</sub>)

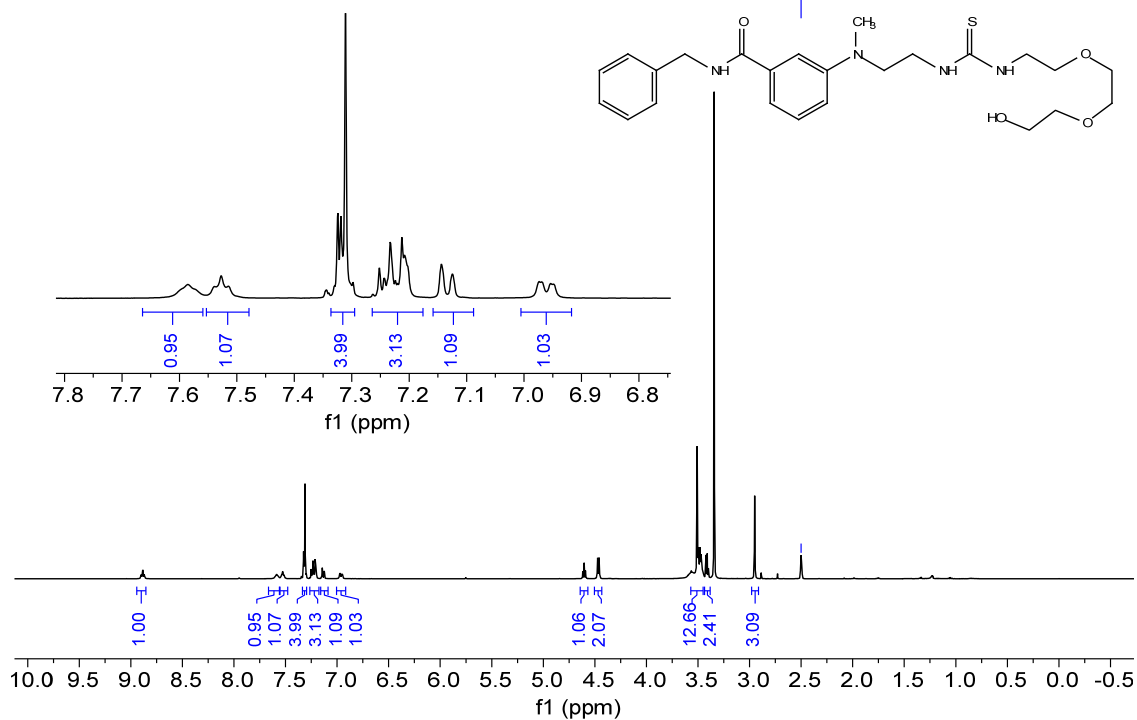

<sup>13</sup>C NMR (101 MHz, DMSO-*d*<sub>6</sub>)

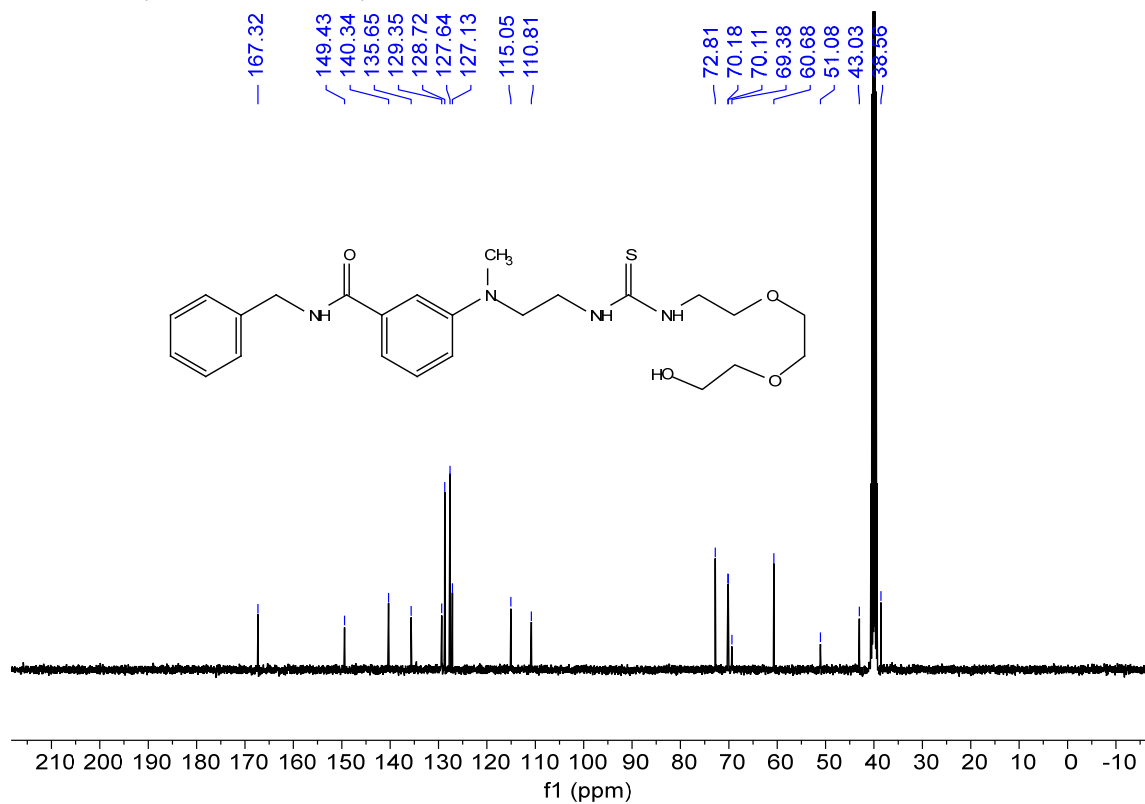

<sup>1</sup>H NMR and <sup>13</sup>C NMR spectrum of **3ma**



<sup>1</sup>H NMR (400 MHz, CDCl<sub>3</sub>)

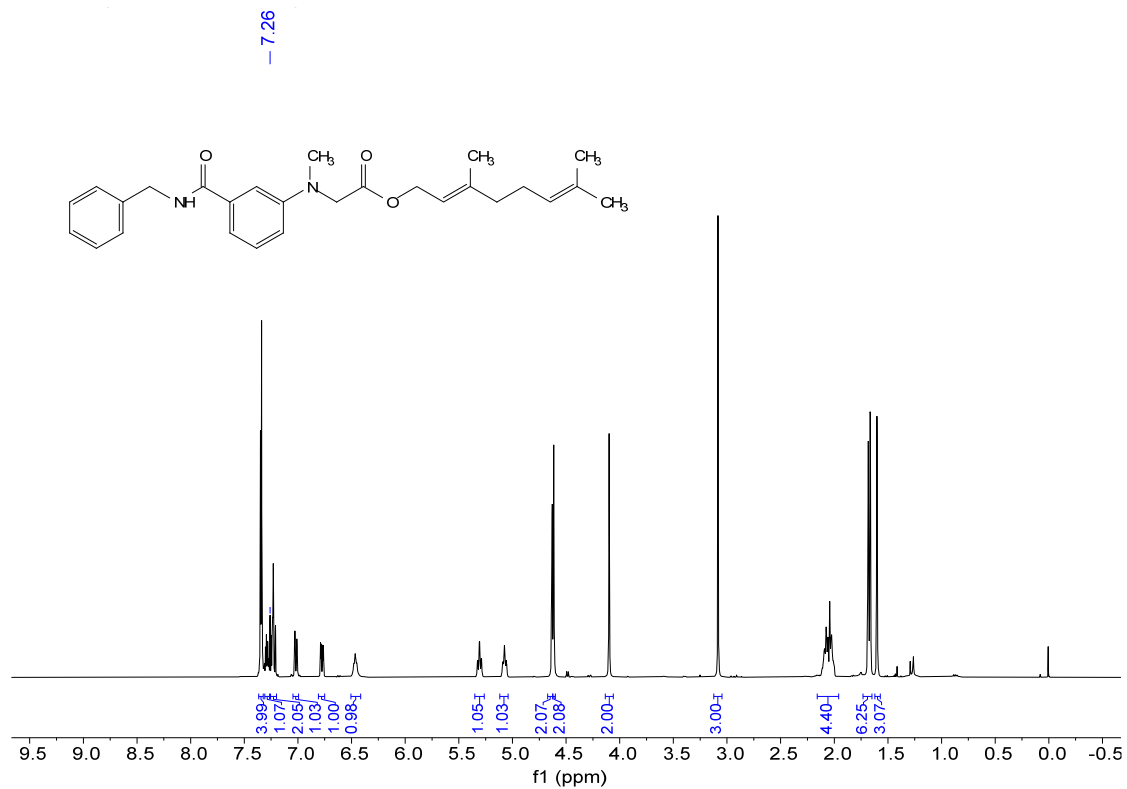

<sup>13</sup>C NMR (101 MHz, CDCl<sub>3</sub>)

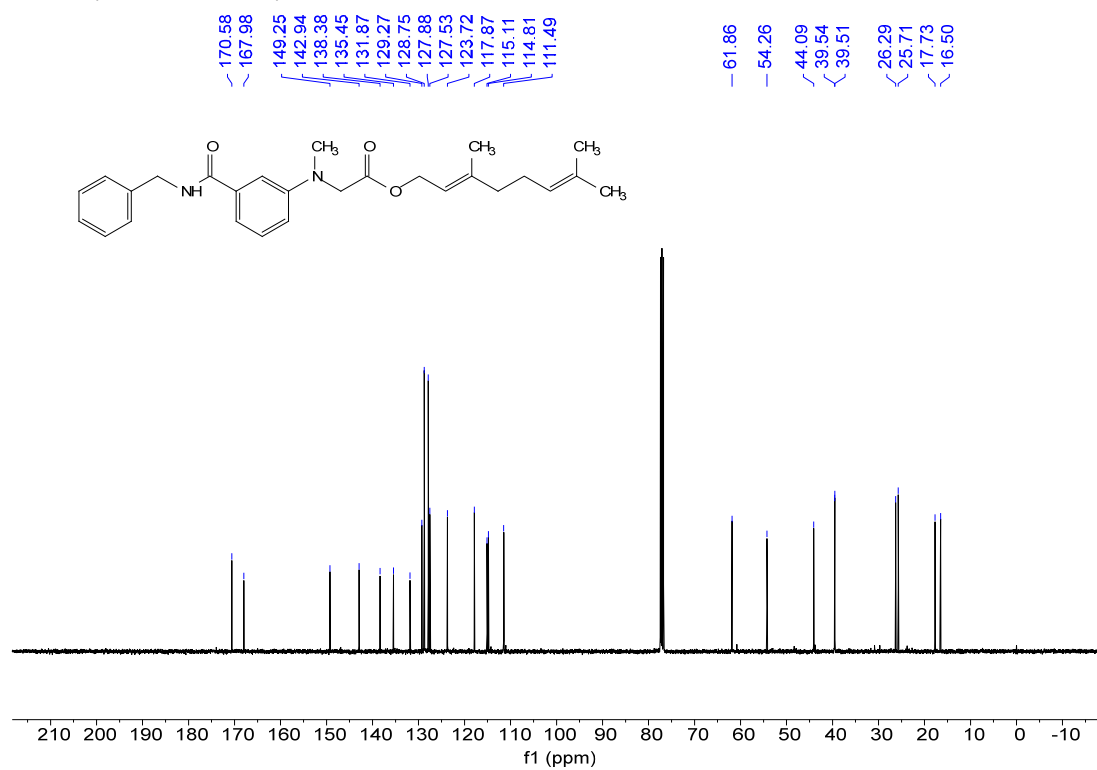

<sup>1</sup>H NMR and <sup>13</sup>C NMR spectrum of **3na**

$^1\text{H}$  NMR (400 MHz,  $\text{CDCl}_3$ )

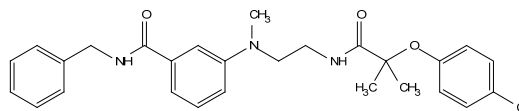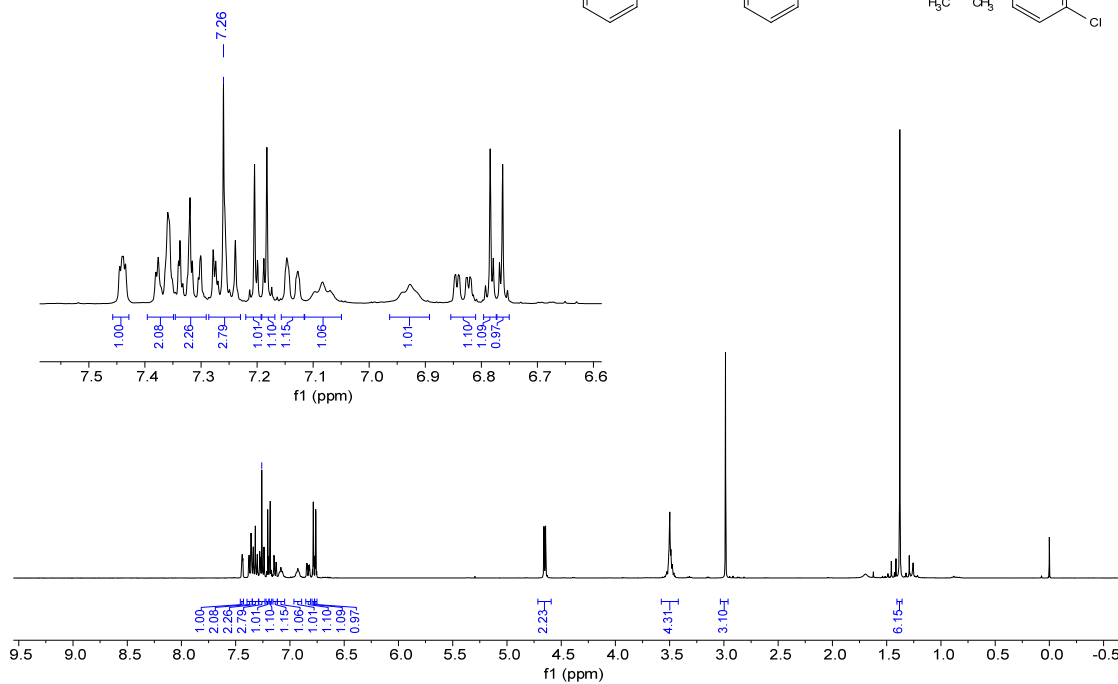

$^{13}\text{C}$  NMR (101 MHz,  $\text{CDCl}_3$ )

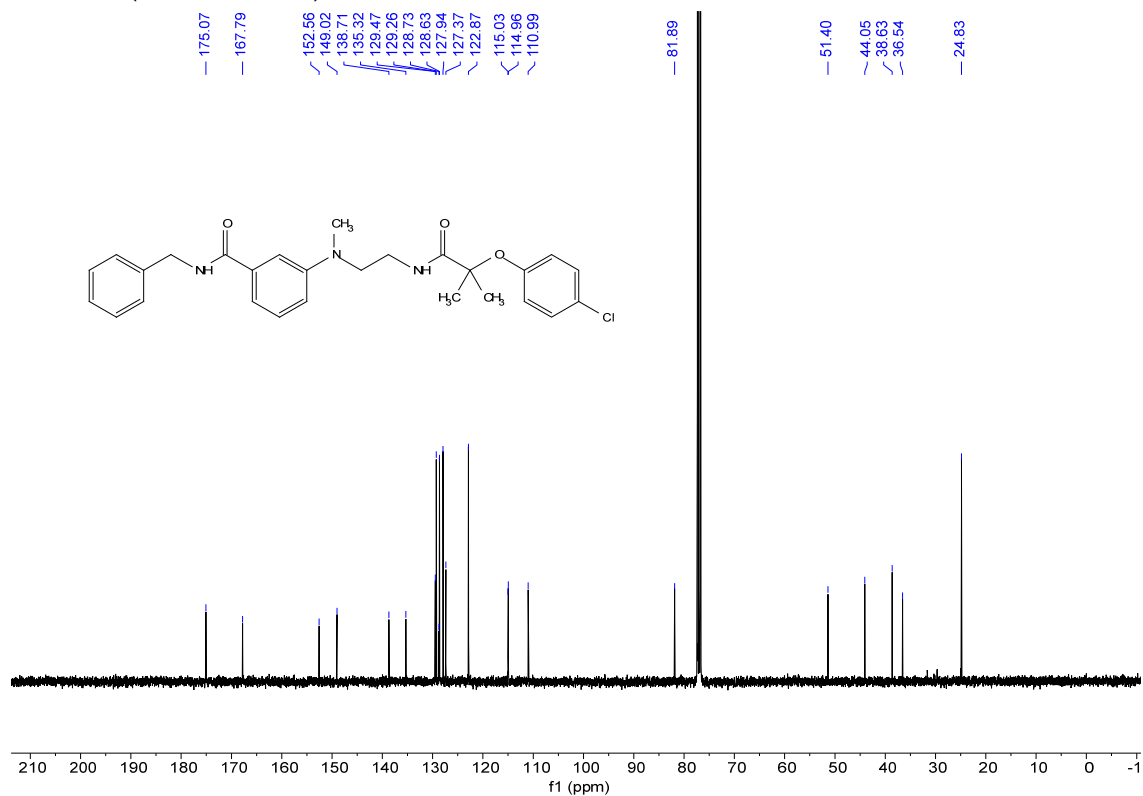

$^1\text{H}$  NMR and  $^{13}\text{C}$  NMR spectrum of **30a**

<sup>1</sup>H NMR (400 MHz, DMSO-d<sub>6</sub>)

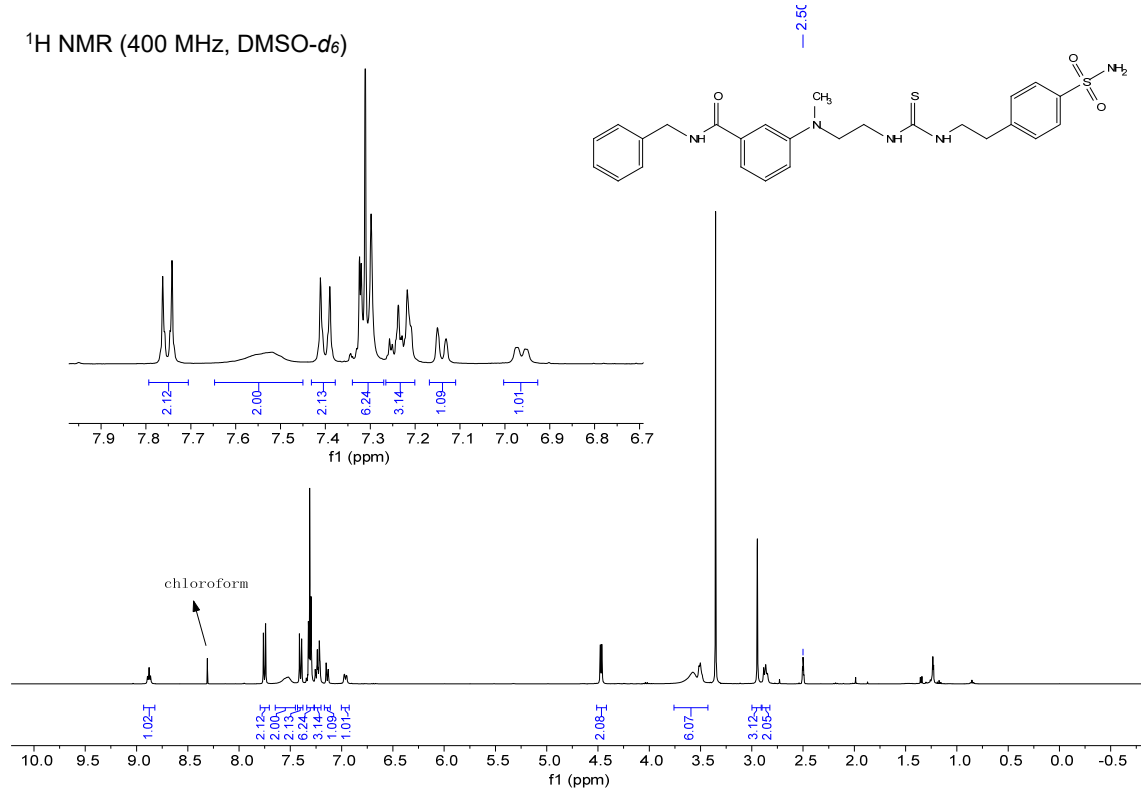

<sup>13</sup>C NMR (101 MHz, DMSO-d<sub>6</sub>)

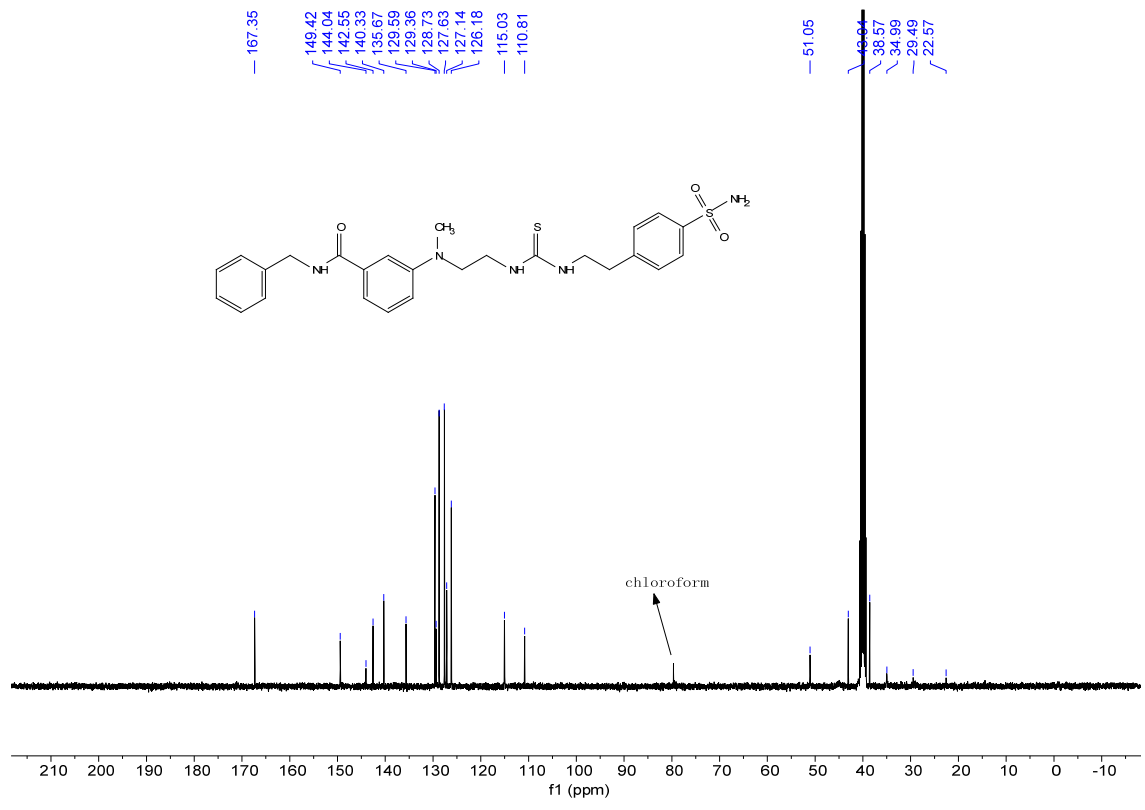

<sup>1</sup>H NMR and <sup>13</sup>C NMR spectrum of 3pa

<sup>1</sup>H NMR (400 MHz, DMSO-*d*<sub>6</sub>)

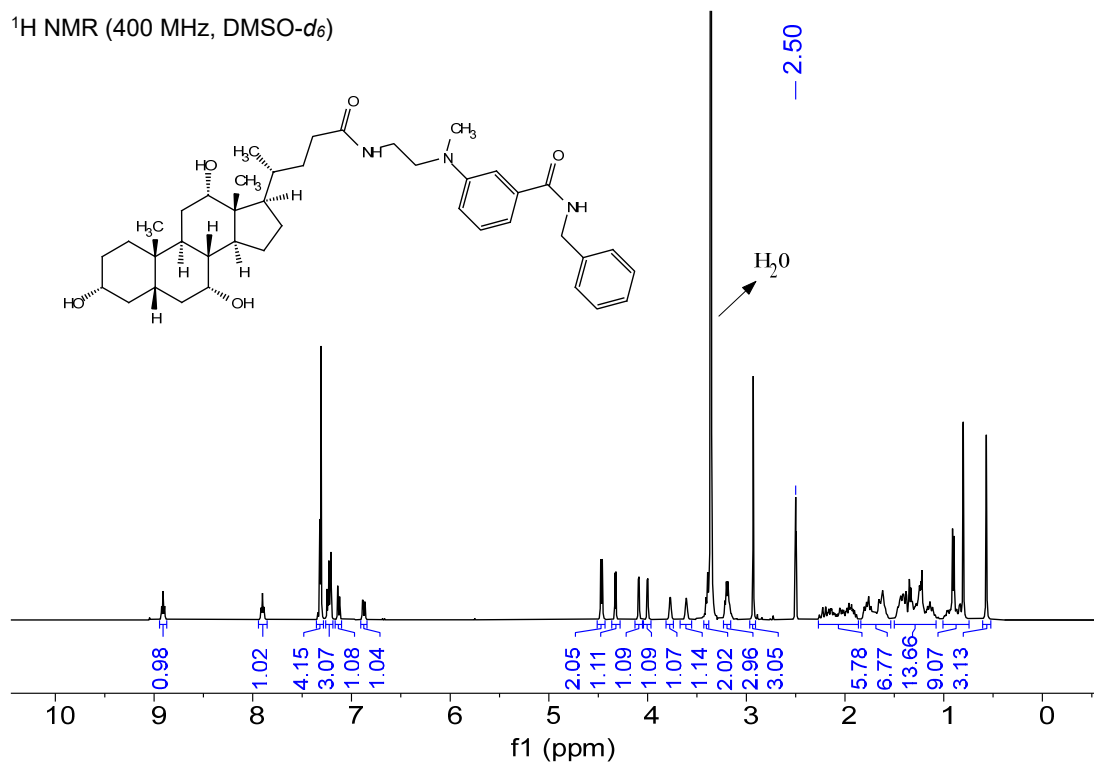

<sup>13</sup>C NMR (101 MHz, DMSO-*d*<sub>6</sub>)

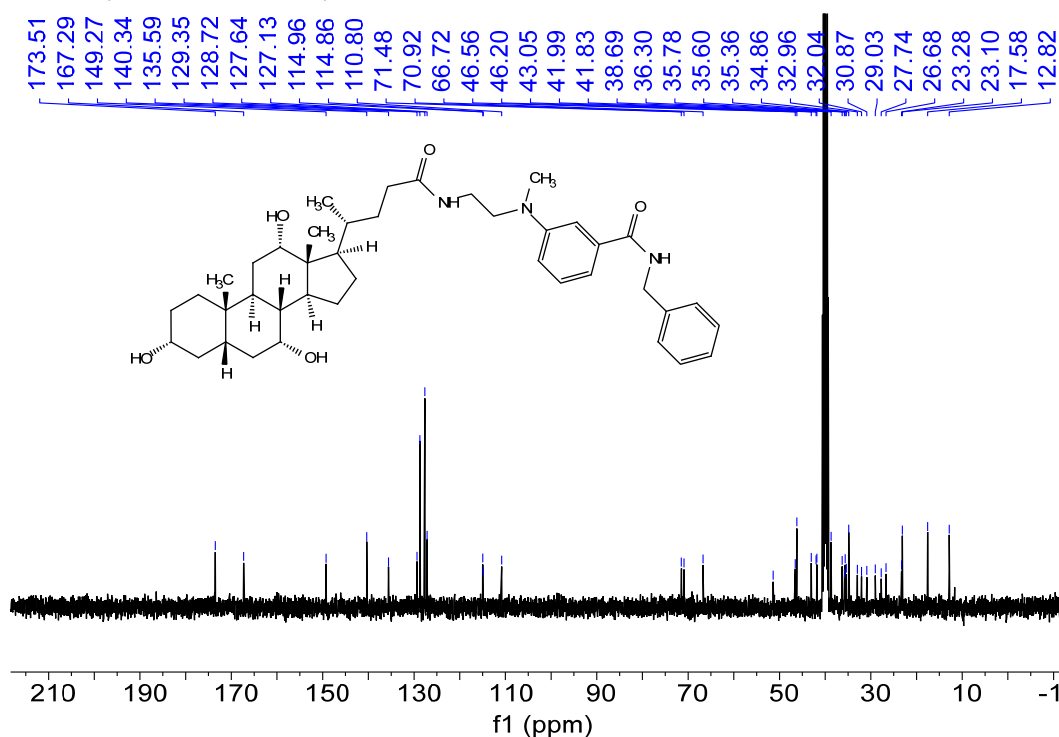

<sup>1</sup>H NMR and <sup>13</sup>C NMR spectrum of **3qa**

<sup>1</sup>H NMR (400 MHz, CDCl<sub>3</sub>)

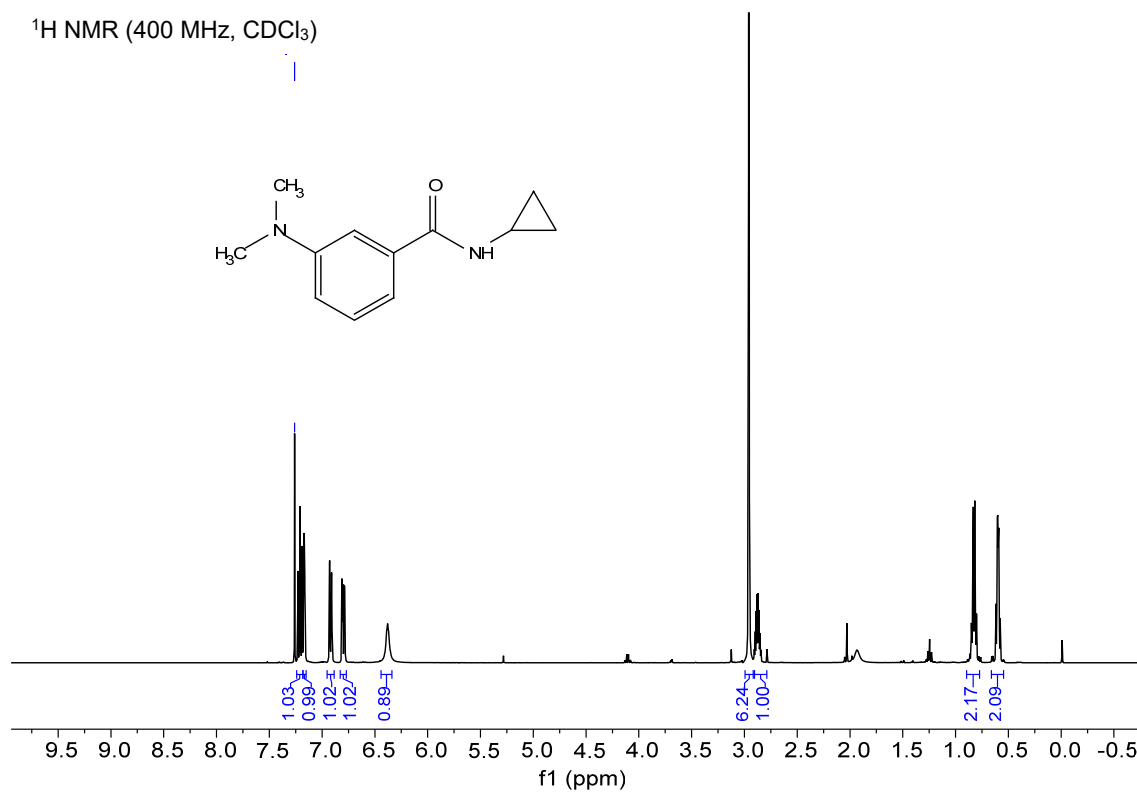

<sup>13</sup>C NMR (101 MHz, CDCl<sub>3</sub>)

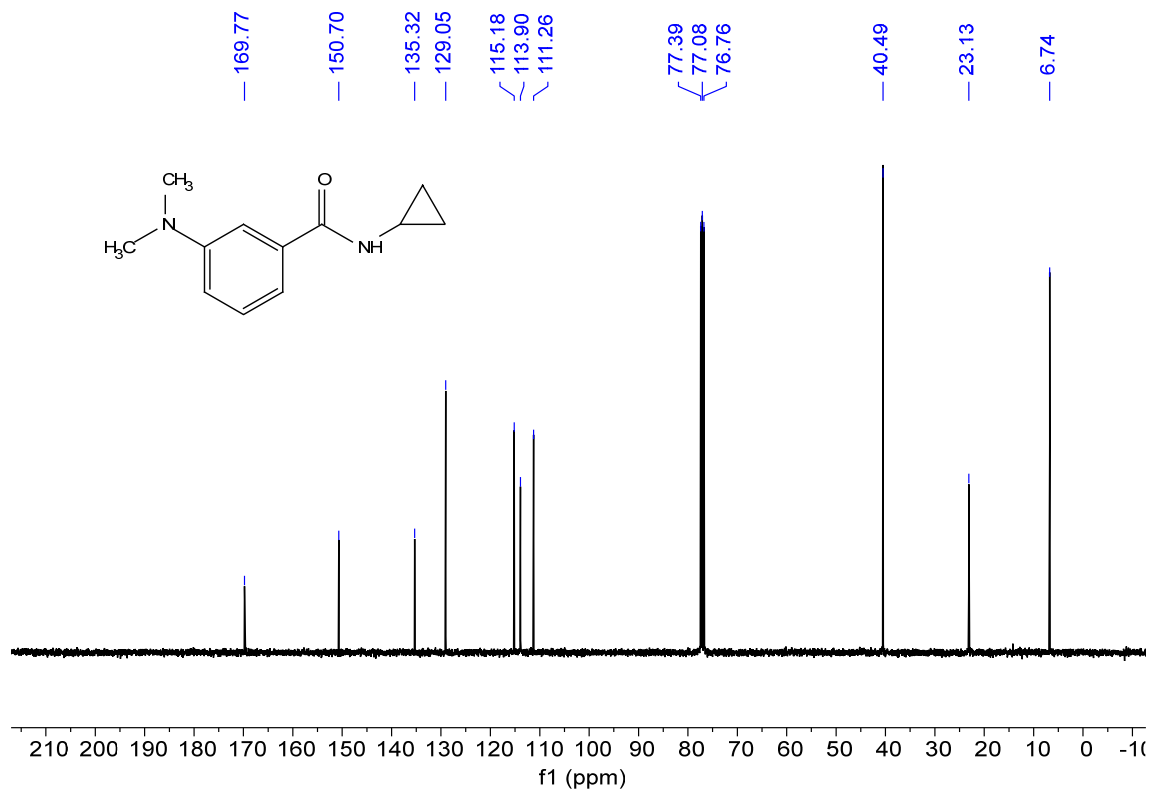

<sup>1</sup>H NMR and <sup>13</sup>C NMR spectrum of **3ab**

$^1\text{H}$  NMR (400 MHz,  $\text{CDCl}_3$ )

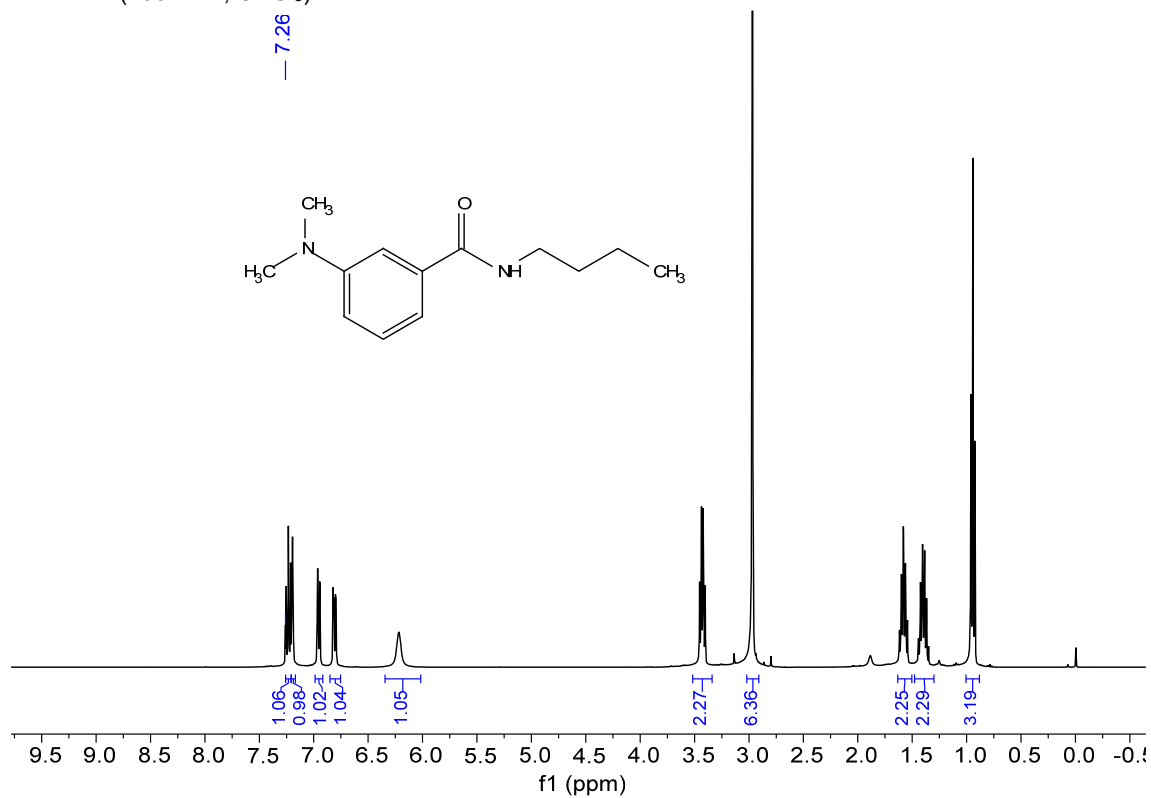

$^{13}\text{C}$  NMR (101 MHz,  $\text{CDCl}_3$ )

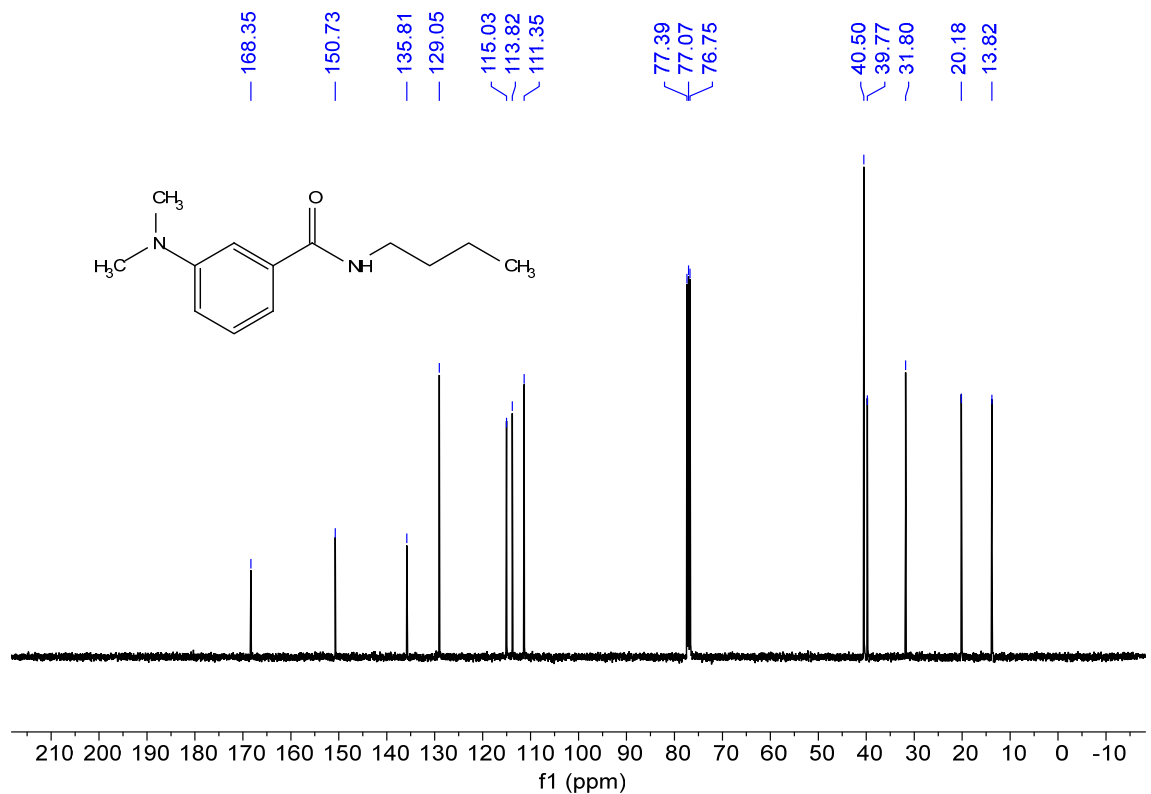

$^1\text{H}$  NMR and  $^{13}\text{C}$  NMR spectrum of **3ac**

$^1\text{H}$  NMR (400 MHz,  $\text{CDCl}_3$ )

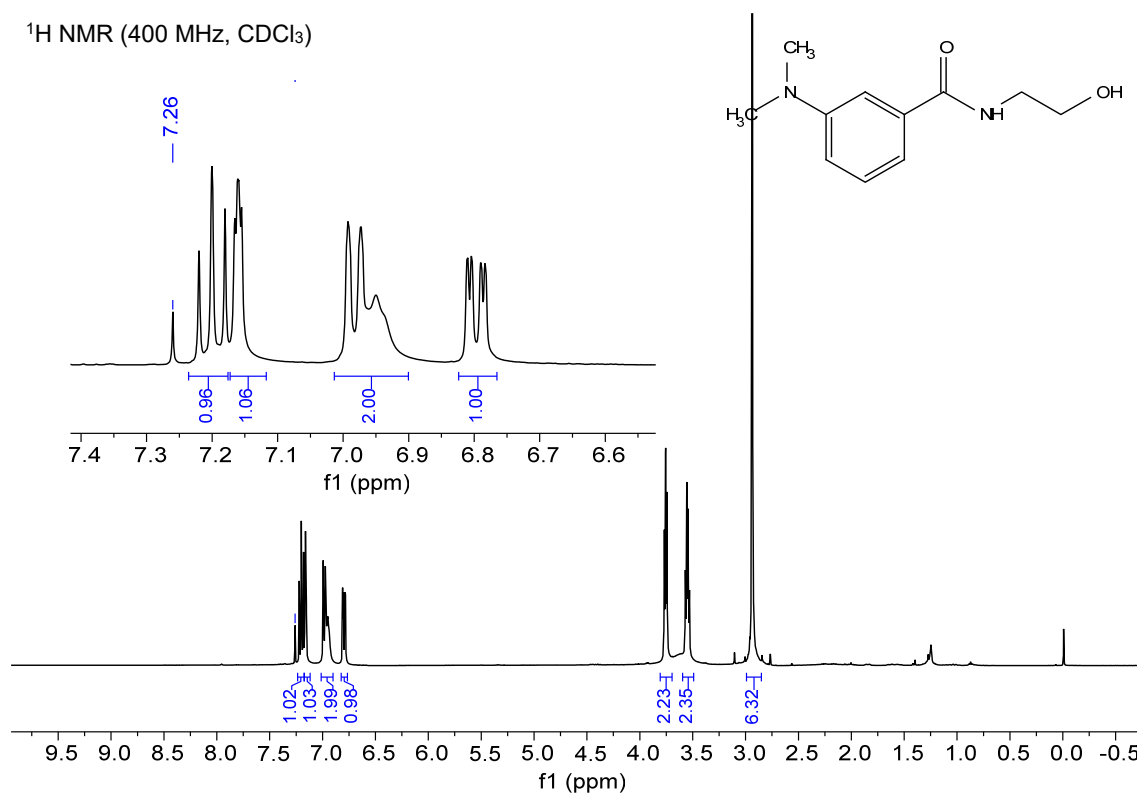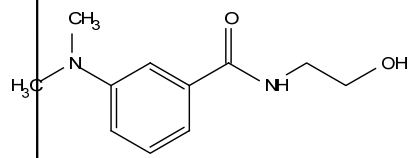

$^{13}\text{C}$  NMR (101 MHz,  $\text{CDCl}_3$ )

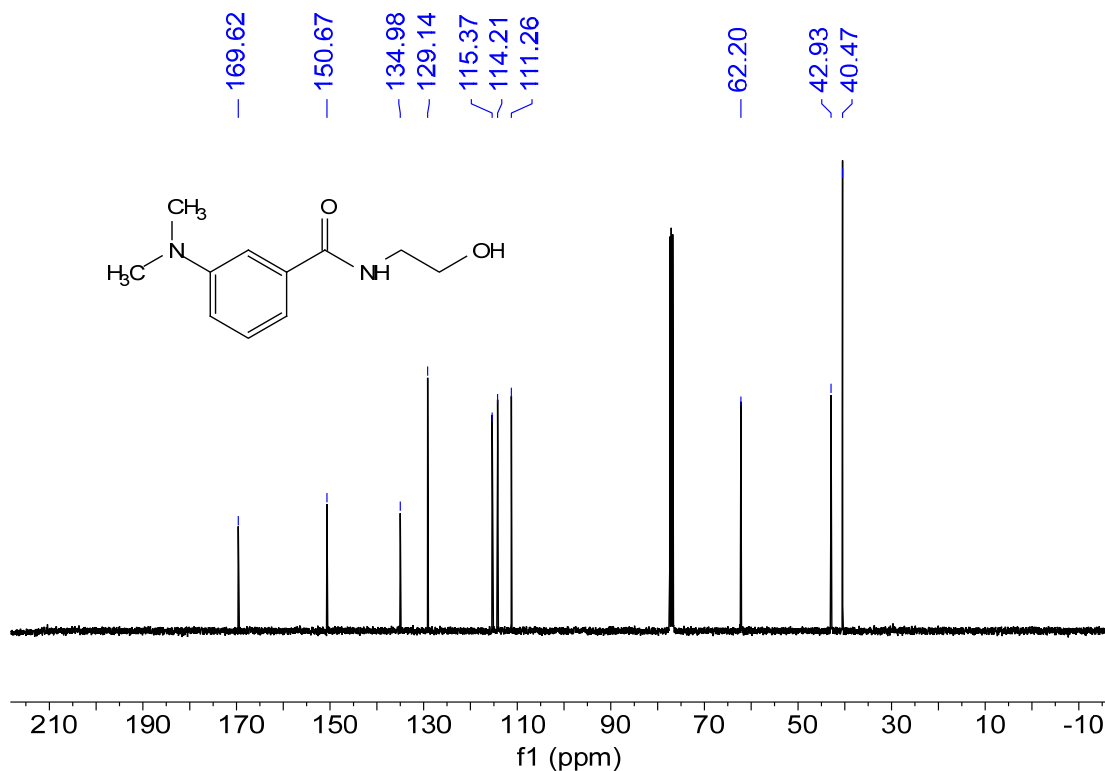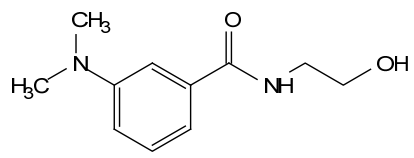

$^1\text{H}$  NMR and  $^{13}\text{C}$  NMR spectrum of **3ad**

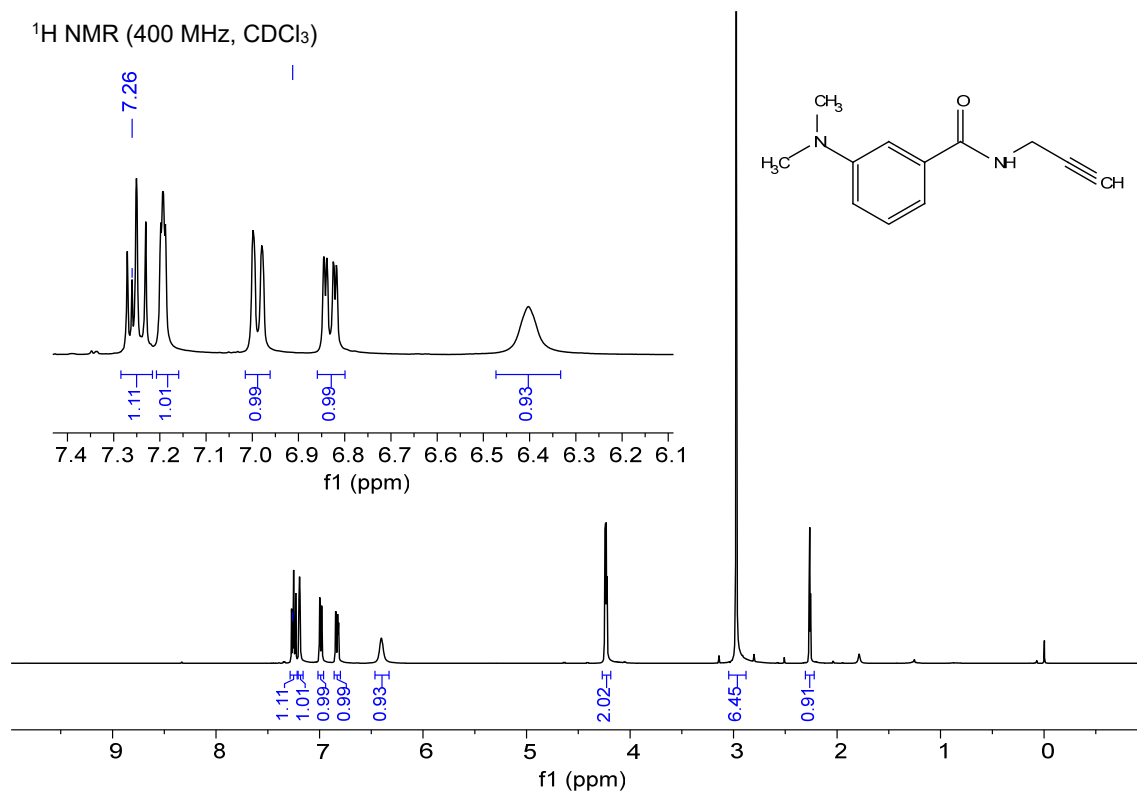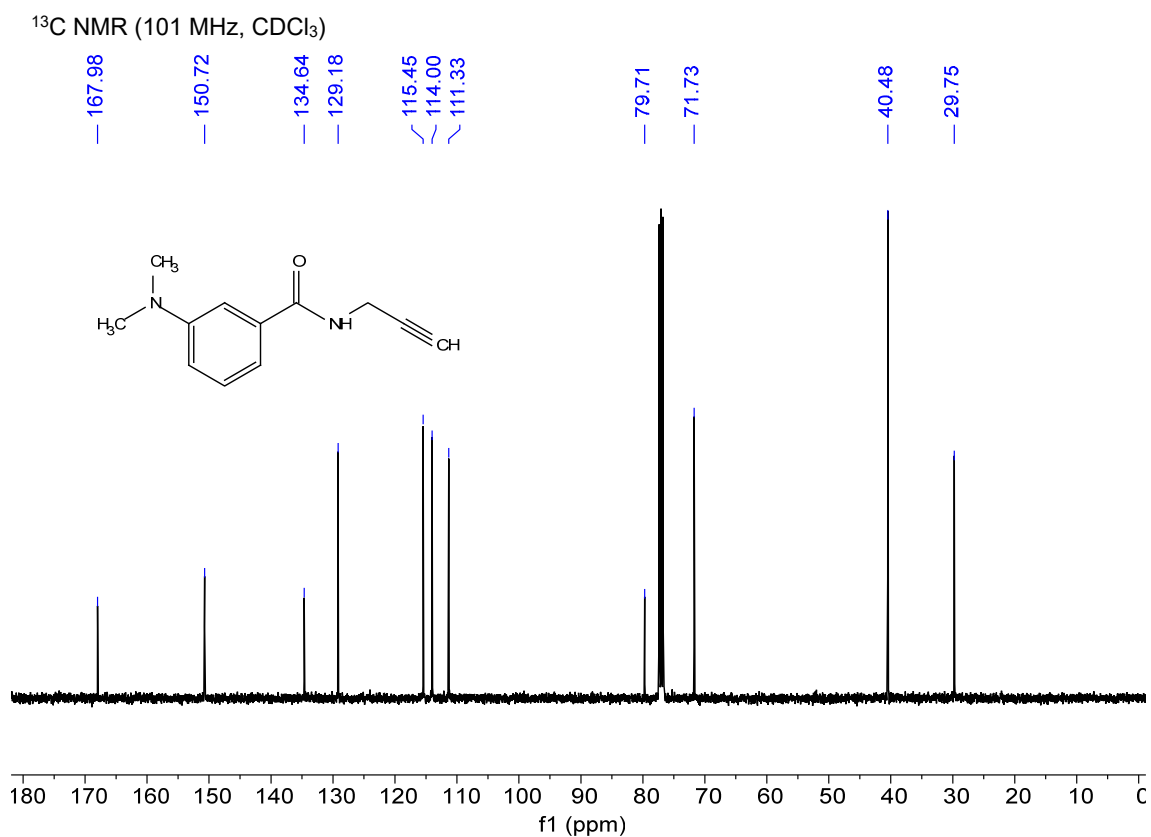

<sup>1</sup>H NMR and <sup>13</sup>C NMR spectrum of 3ae



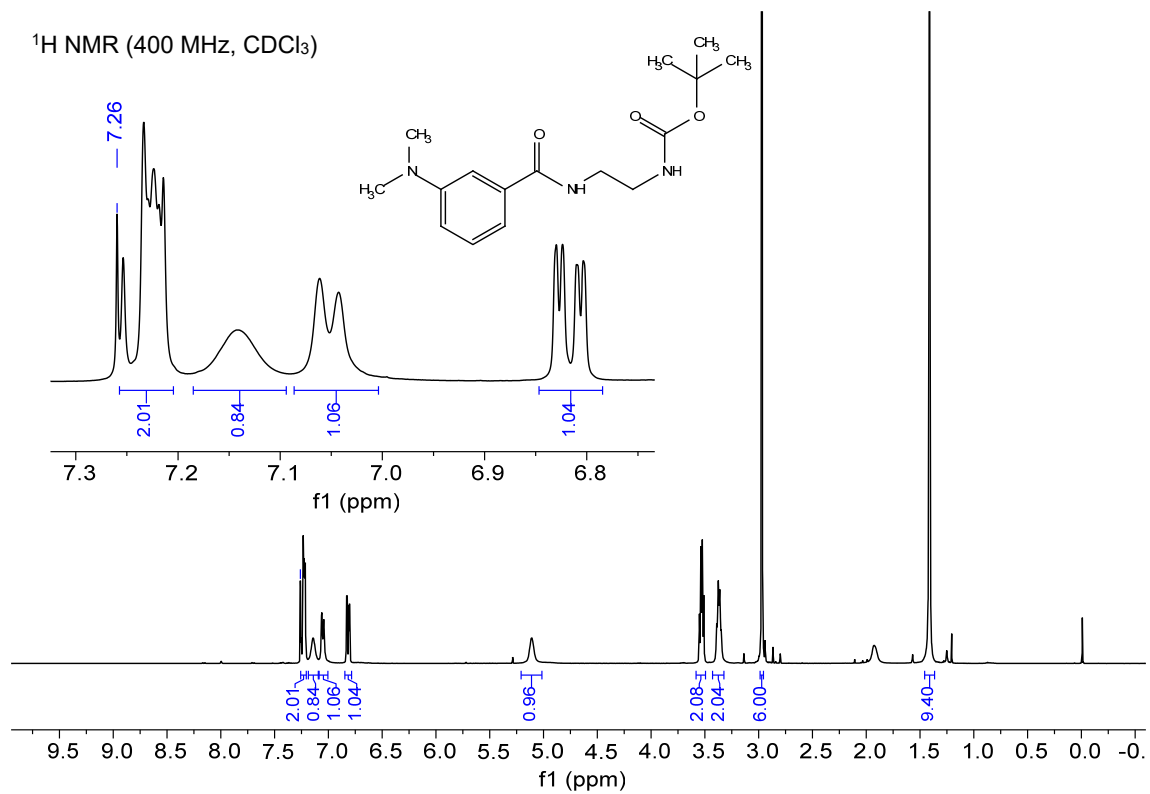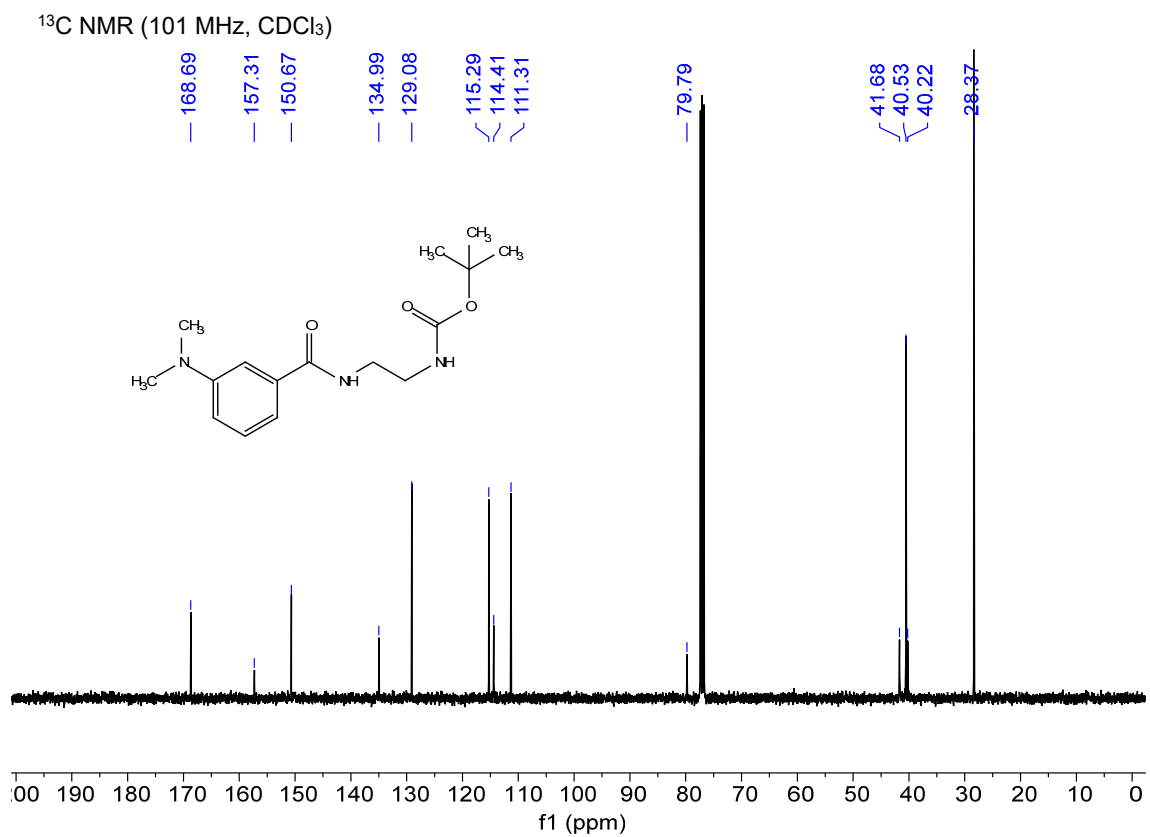

<sup>1</sup>H NMR and <sup>13</sup>C NMR spectrum of 3af

$^1\text{H}$  NMR (400 MHz,  $\text{CDCl}_3$ )

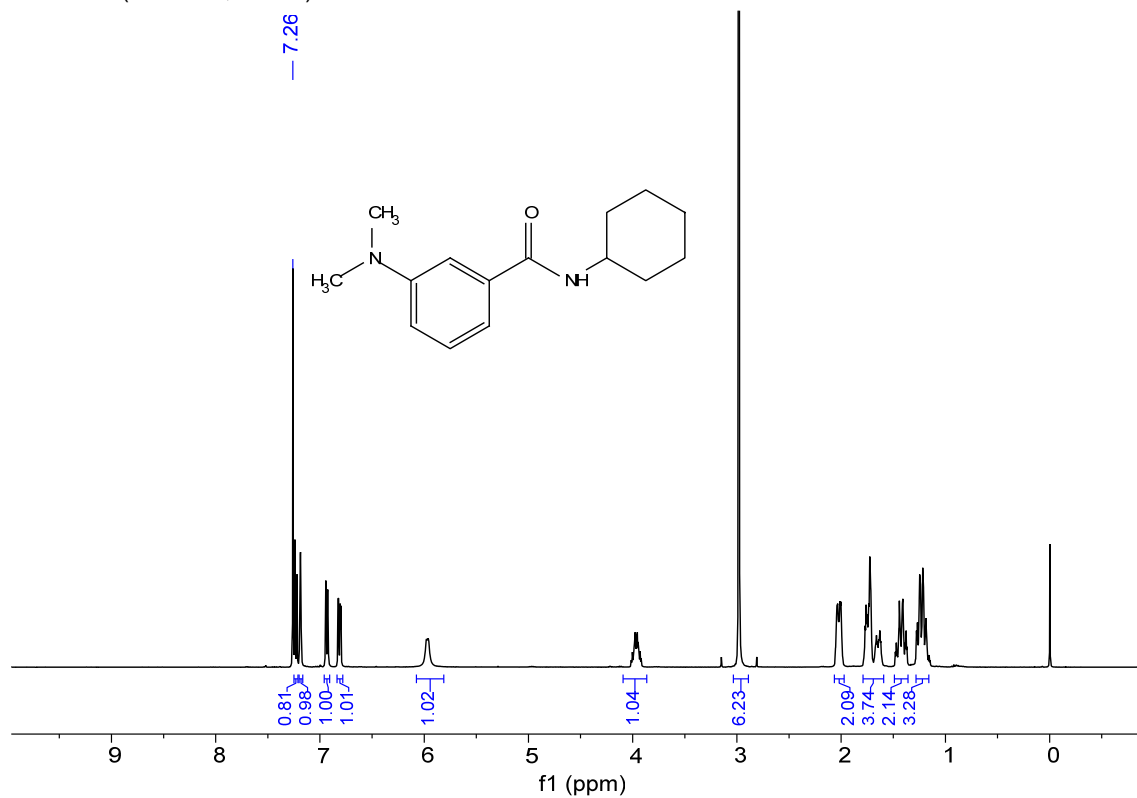

$^{13}\text{C}$  NMR (101 MHz,  $\text{CDCl}_3$ )

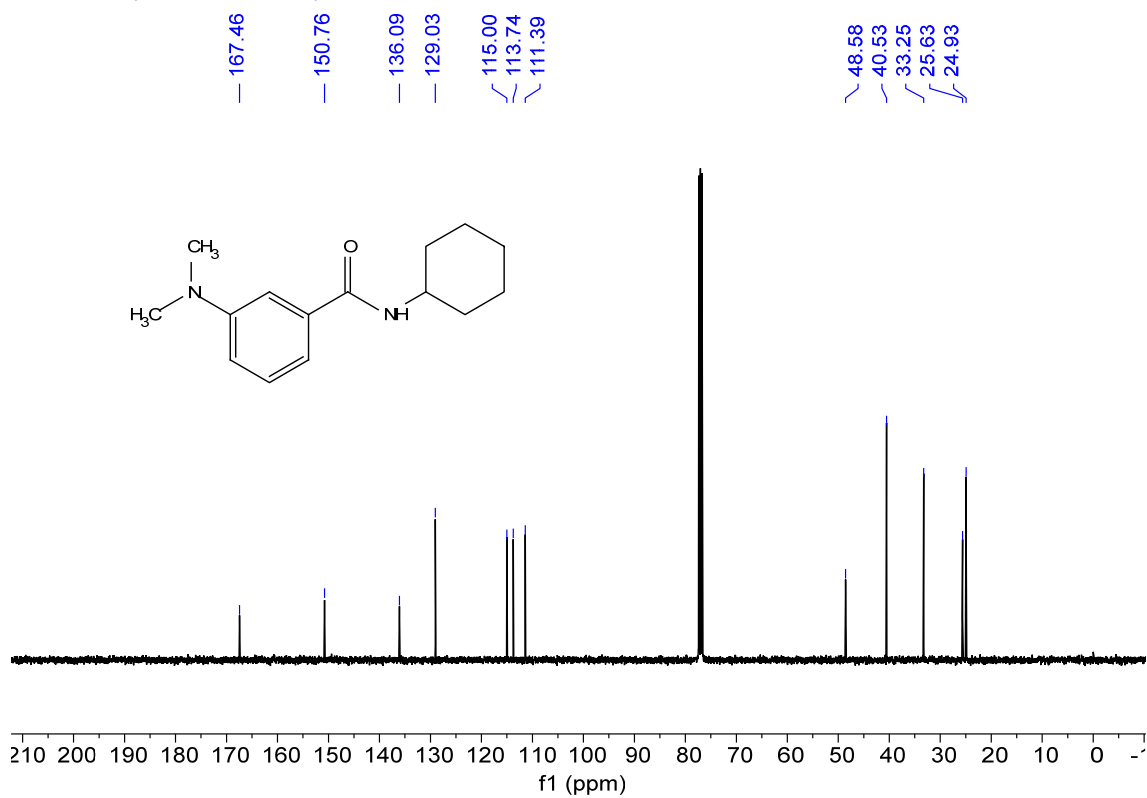

$^1\text{H}$  NMR and  $^{13}\text{C}$  NMR spectrum of **3ag**

<sup>1</sup>H NMR (400 MHz, CDCl<sub>3</sub>)

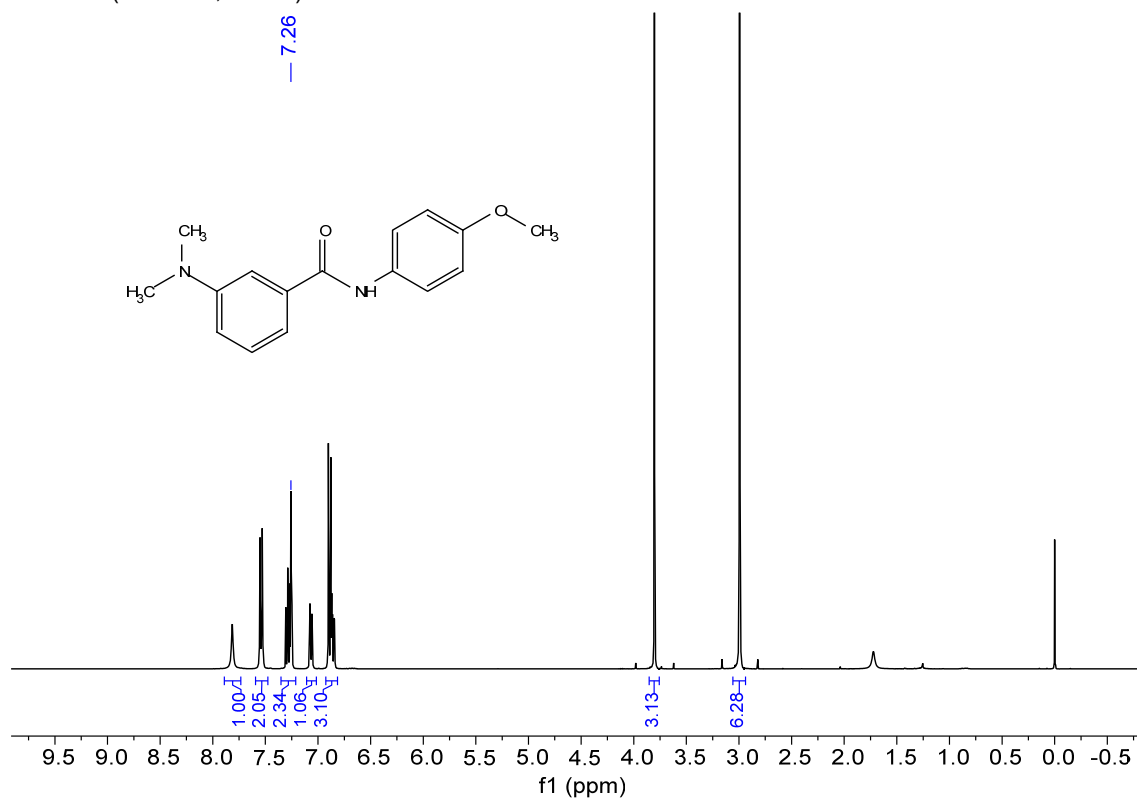

<sup>13</sup>C NMR (101 MHz, CDCl<sub>3</sub>)

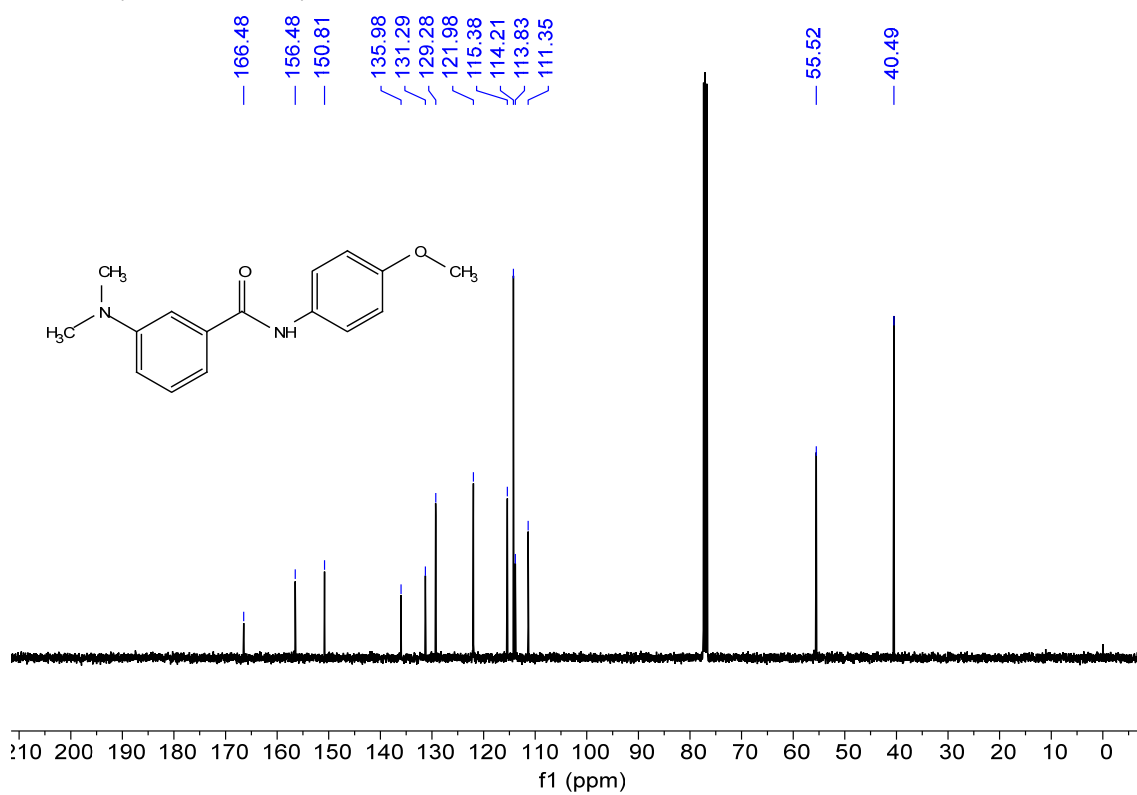

<sup>1</sup>H NMR and <sup>13</sup>C NMR spectrum of **3ah**

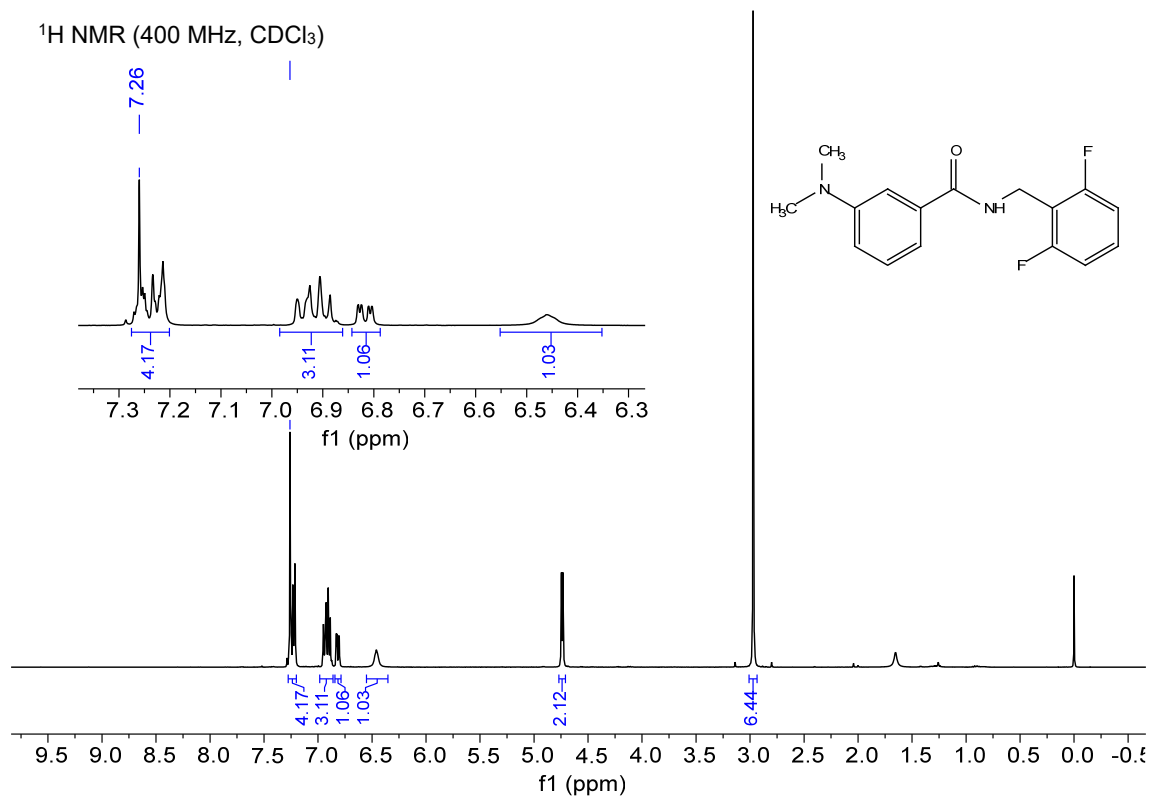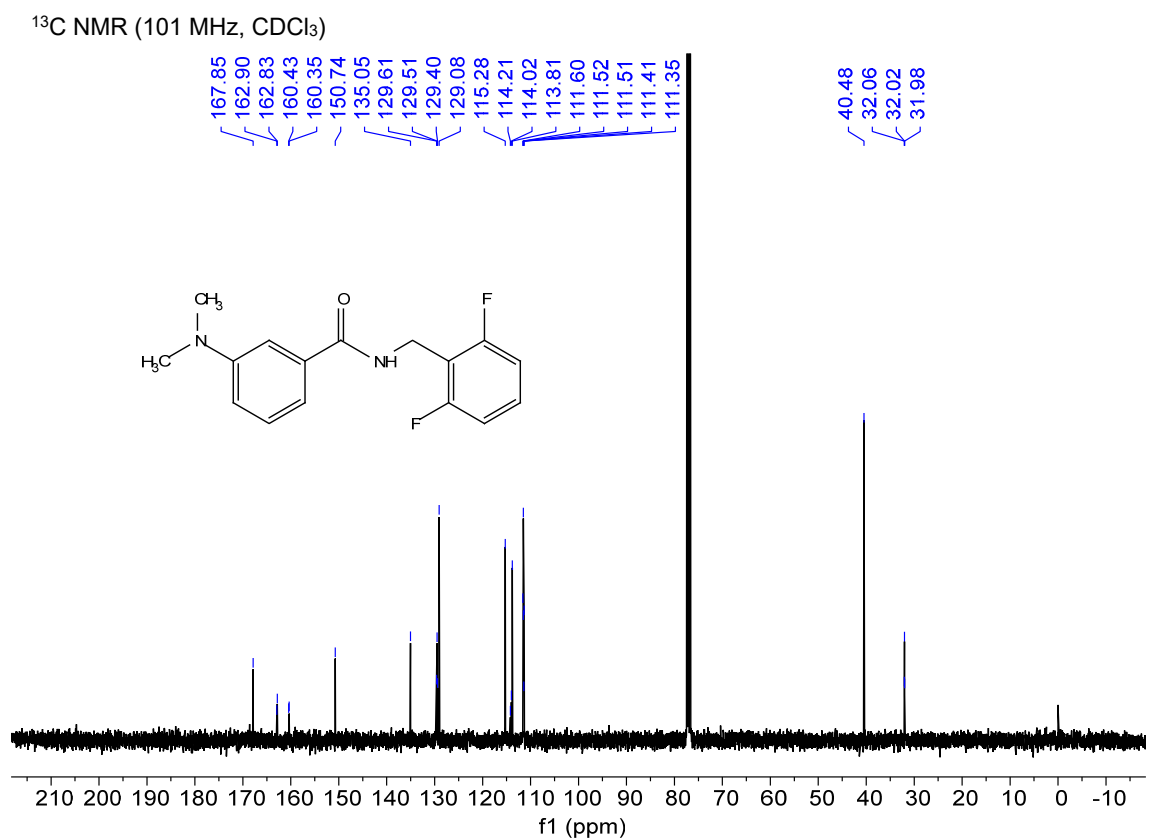

<sup>1</sup>H NMR and <sup>13</sup>C NMR spectrum of 3ai

$^{19}\text{F}$  NMR (376 MHz,  $\text{CDCl}_3$ )

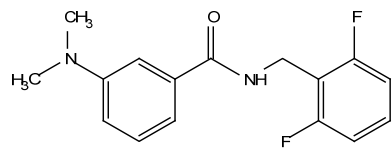

-114.73

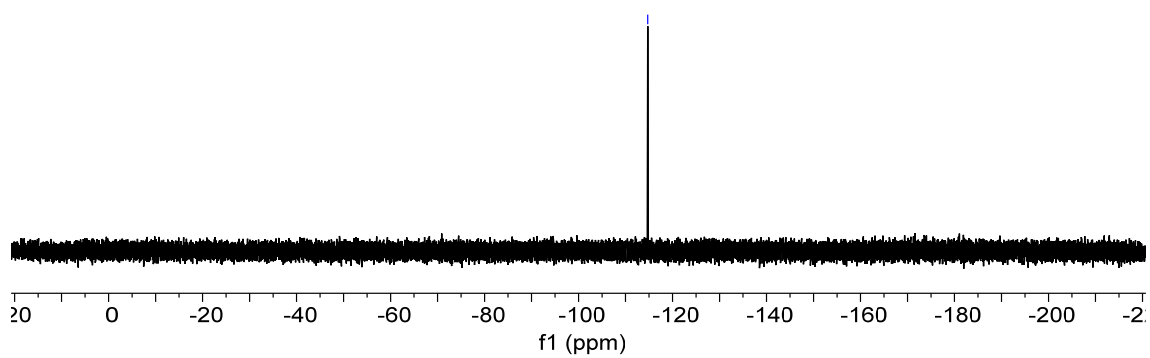

$^{19}\text{F}$  NMR spectrum of **3ai**

$^1\text{H}$  NMR (400 MHz,  $\text{CDCl}_3$ )

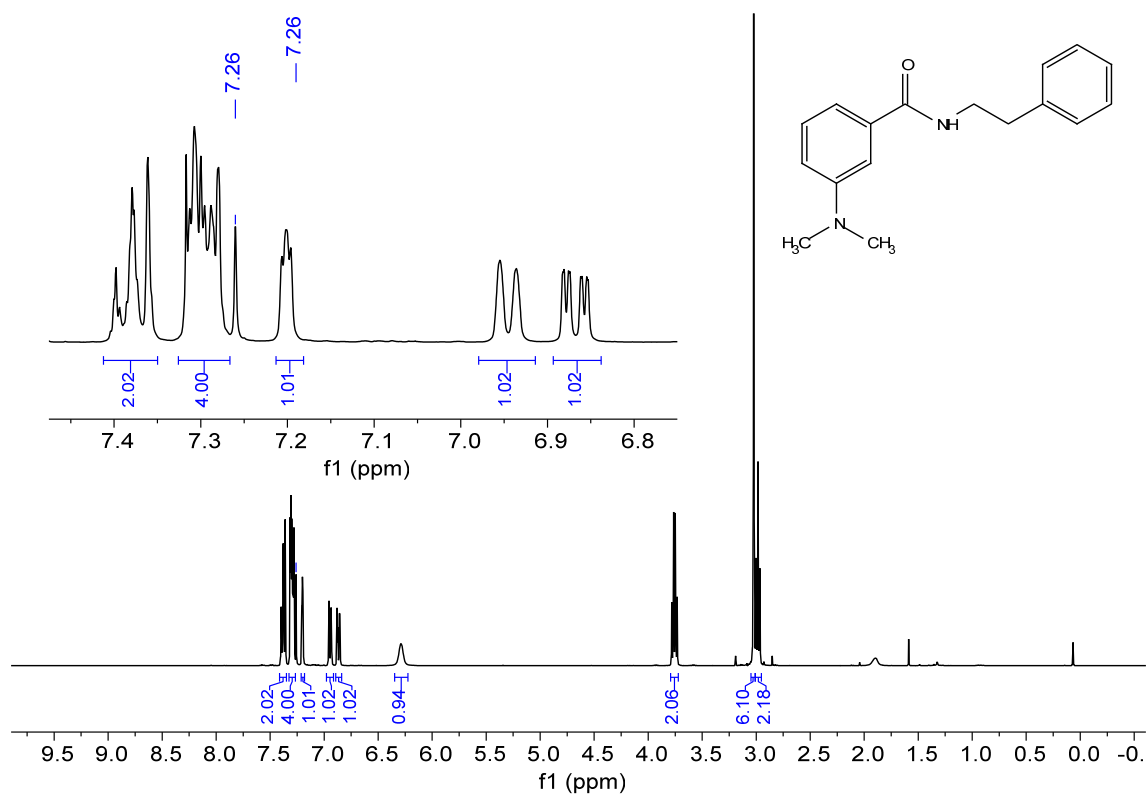

$^{13}\text{C}$  NMR (101 MHz,  $\text{CDCl}_3$ )

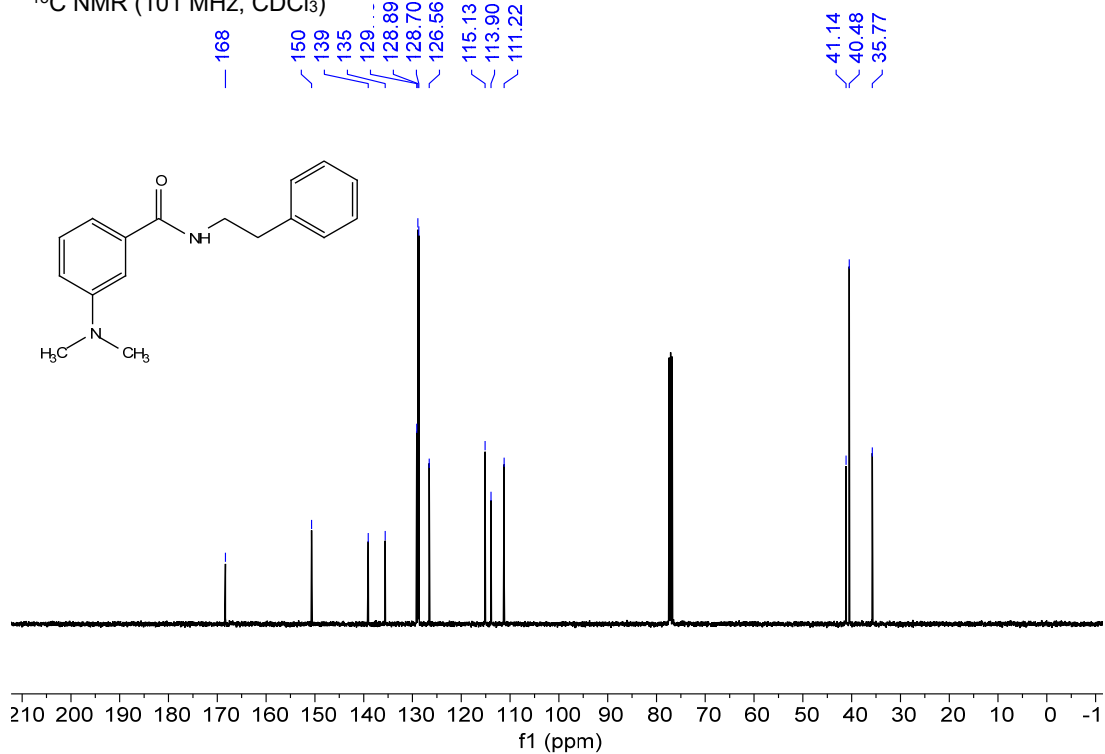

$^1\text{H}$  NMR and  $^{13}\text{C}$  NMR spectrum of **3aj**

$^1\text{H}$  NMR (400 MHz,  $\text{CDCl}_3$ )

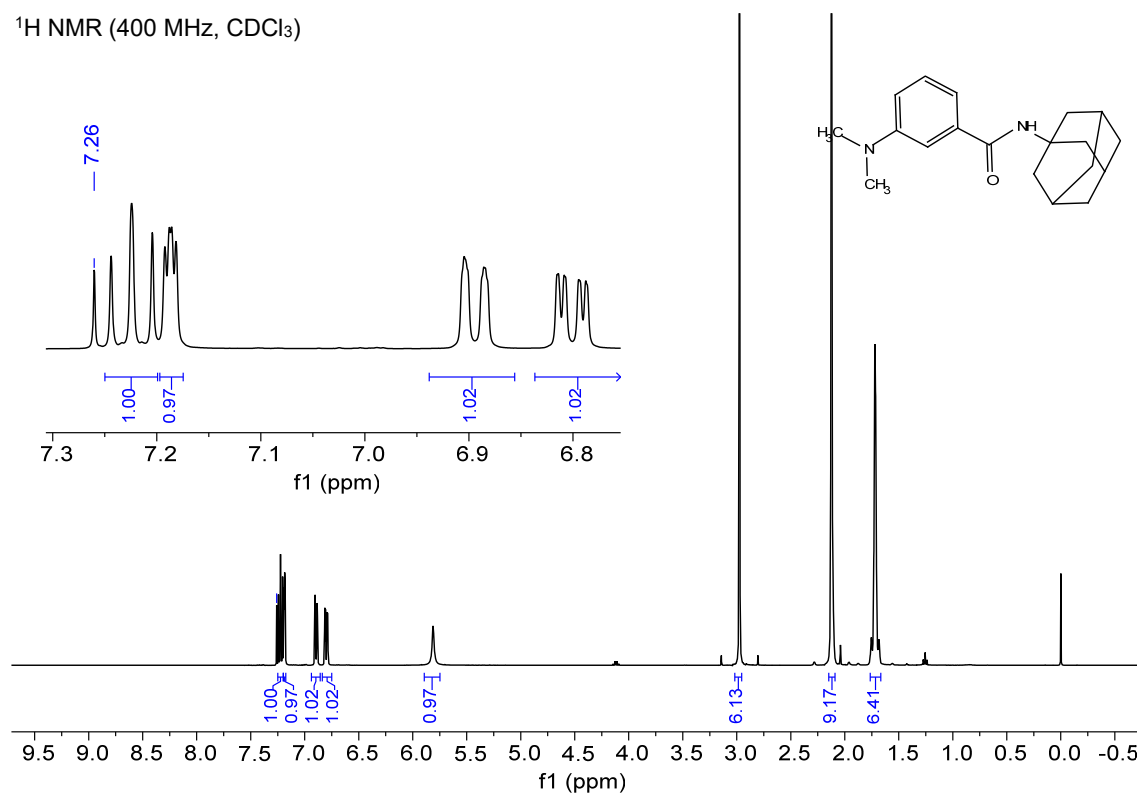

$^{13}\text{C}$  NMR (101 MHz,  $\text{CDCl}_3$ )

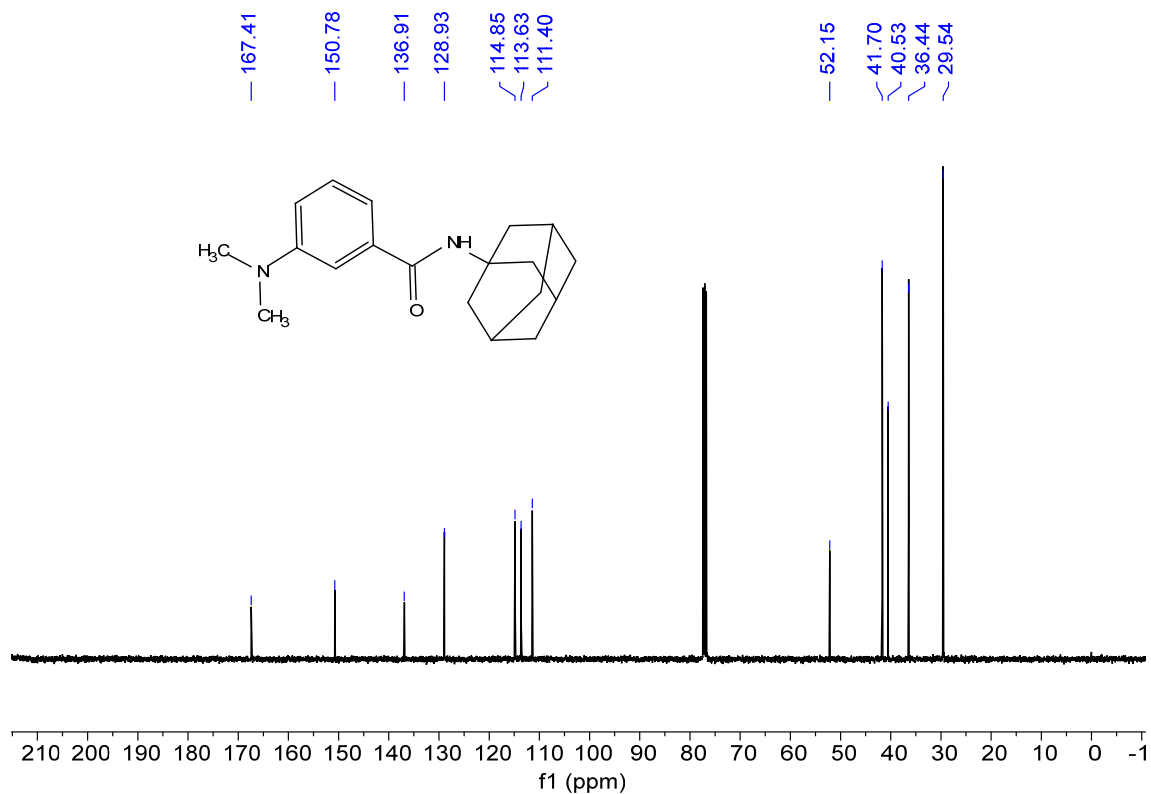

$^1\text{H}$  NMR and  $^{13}\text{C}$  NMR spectrum of **3aI**

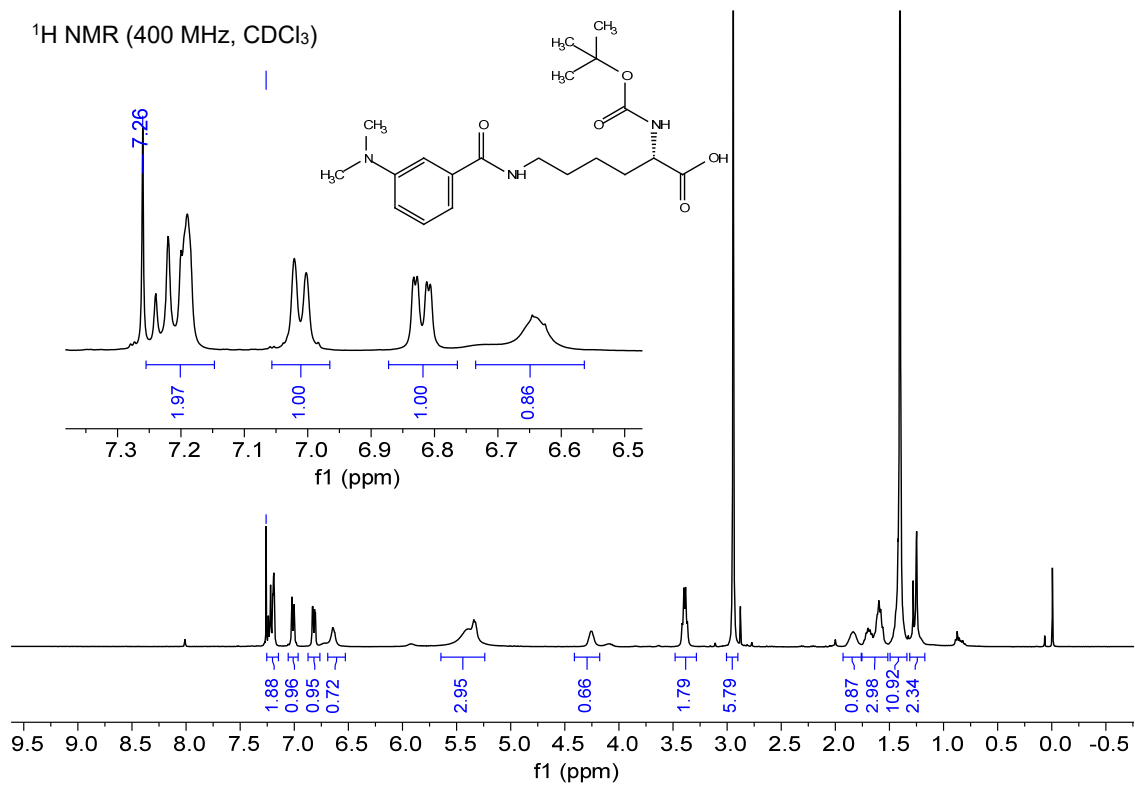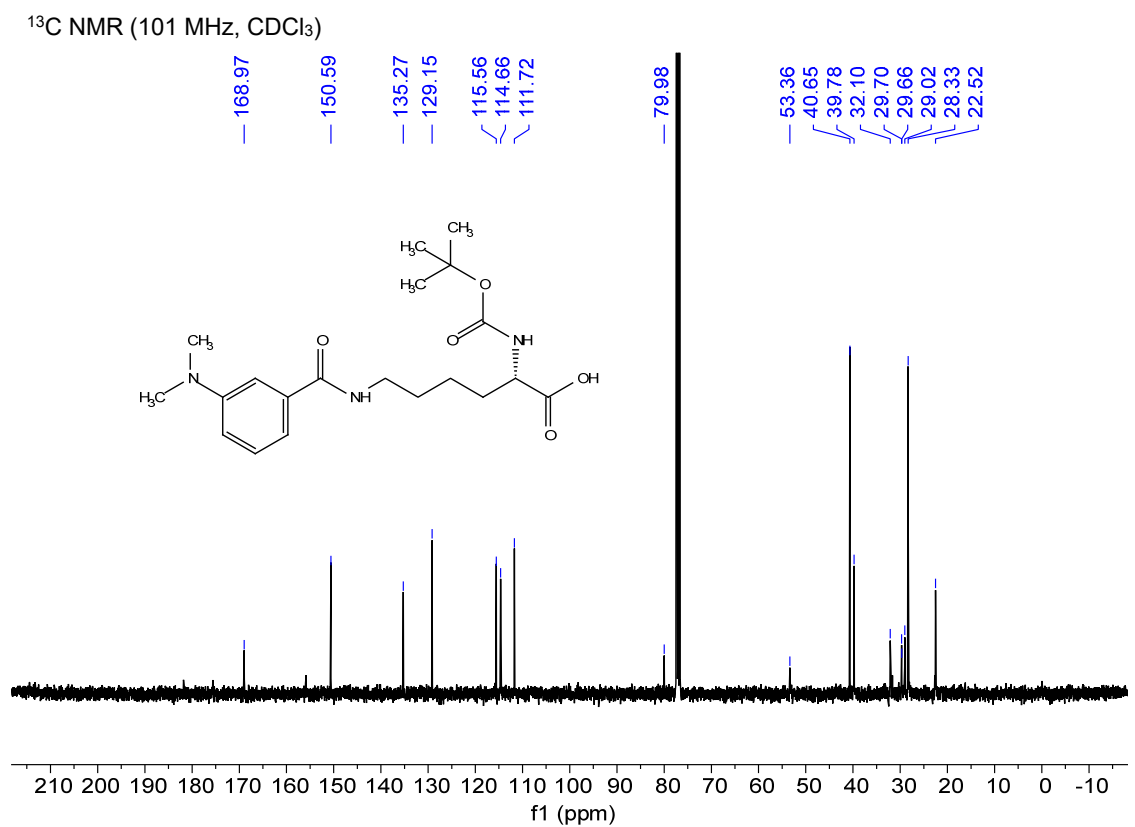

<sup>1</sup>H NMR and <sup>13</sup>C NMR spectrum of **3am**



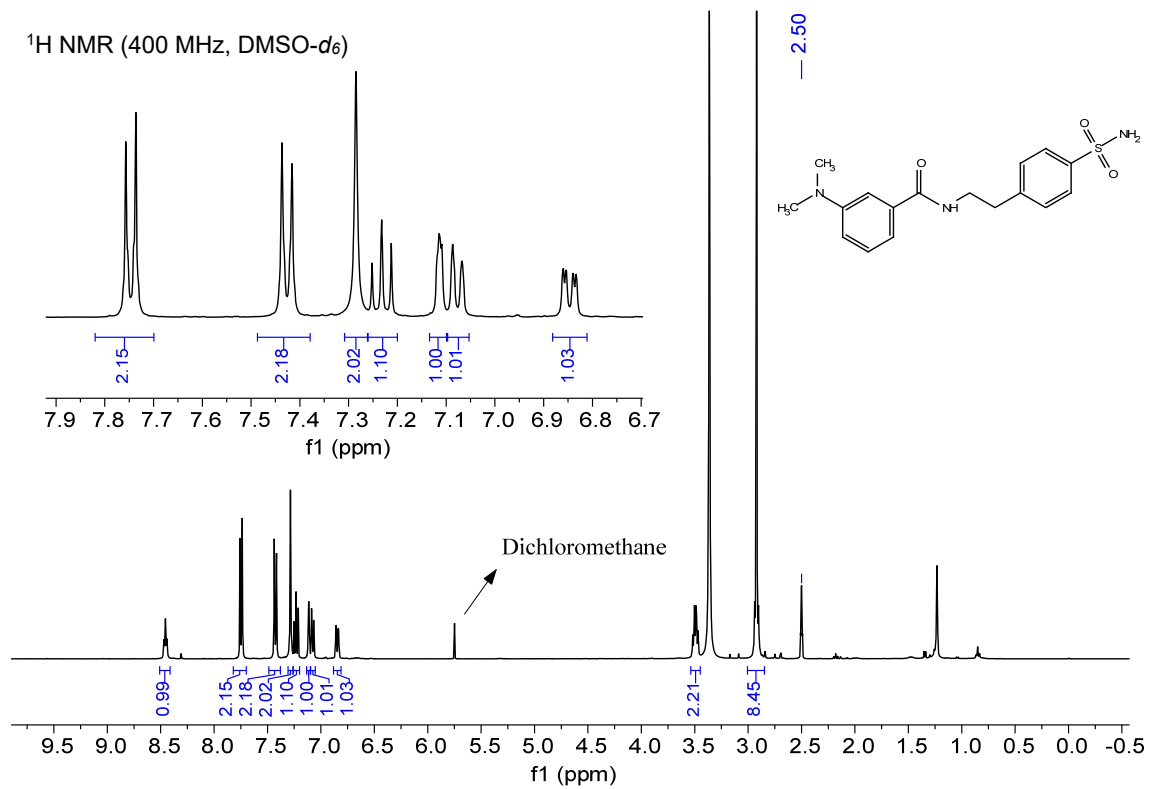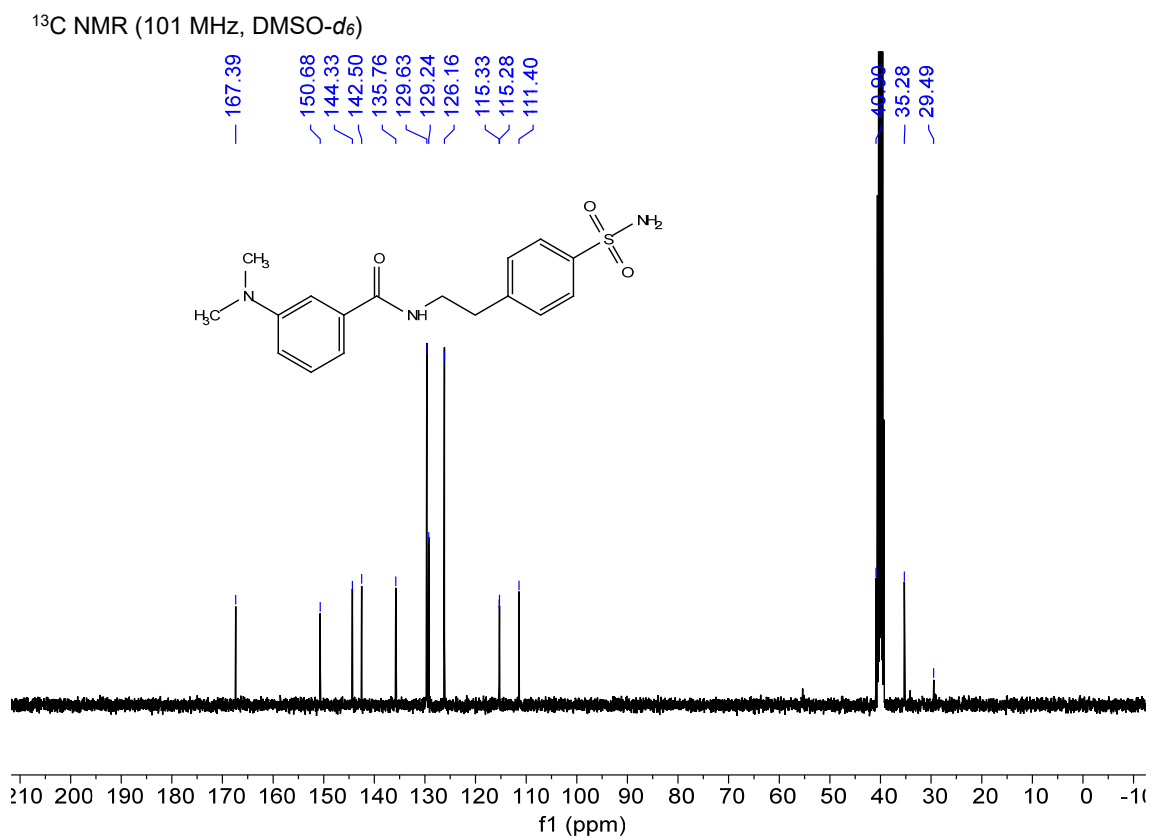

<sup>1</sup>H NMR and <sup>13</sup>C NMR spectrum of 3an

<sup>1</sup>H NMR (400 MHz, CDCl<sub>3</sub>)

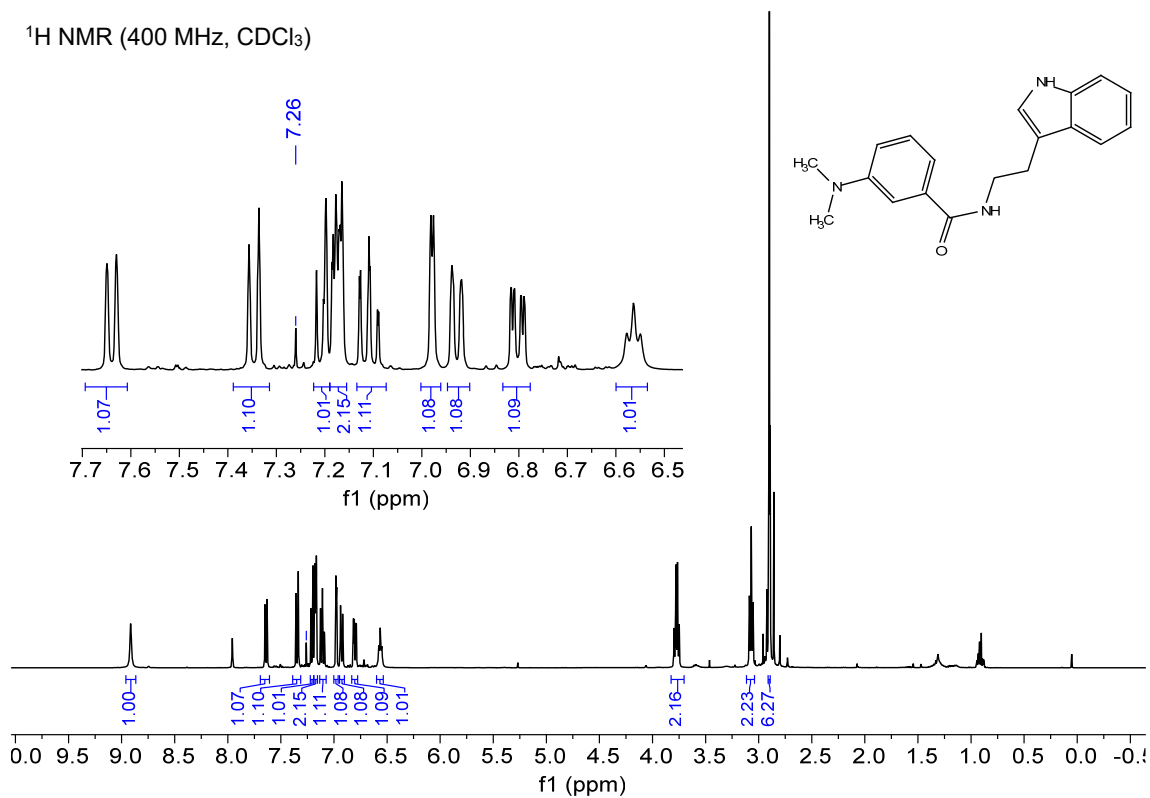

<sup>13</sup>C NMR (101 MHz, CDCl<sub>3</sub>)

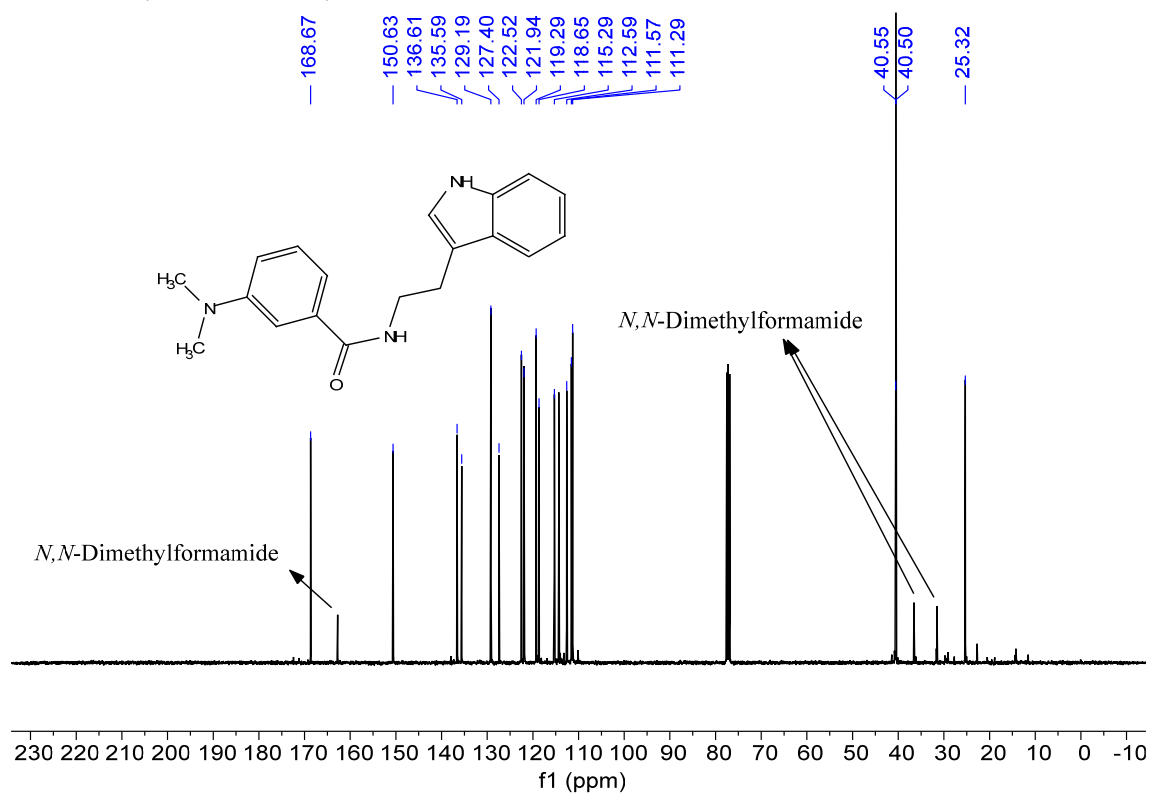

<sup>1</sup>H NMR and <sup>13</sup>C NMR spectrum of 3ao

<sup>1</sup>H NMR (400 MHz, CDCl<sub>3</sub>)

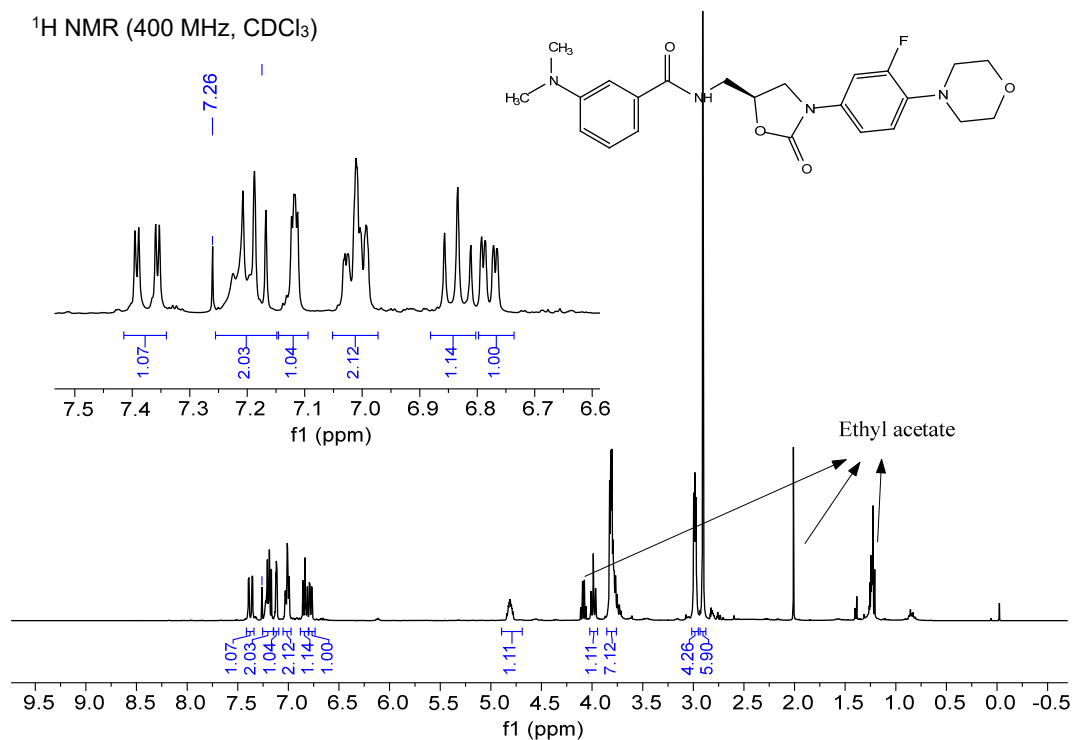

<sup>13</sup>C NMR (101 MHz, CDCl<sub>3</sub>)

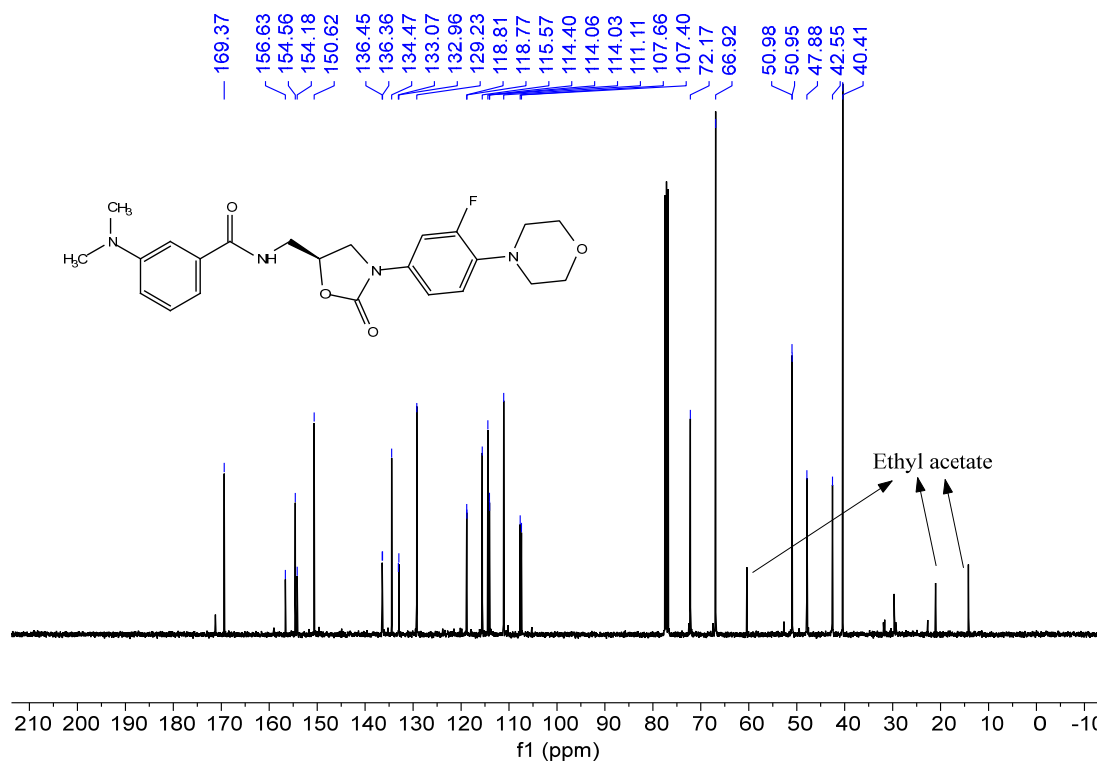

<sup>1</sup>H NMR and <sup>13</sup>C NMR spectrum of **3ap**

$^1\text{H}$  NMR (400 MHz,  $\text{DMSO-}d_6$ )

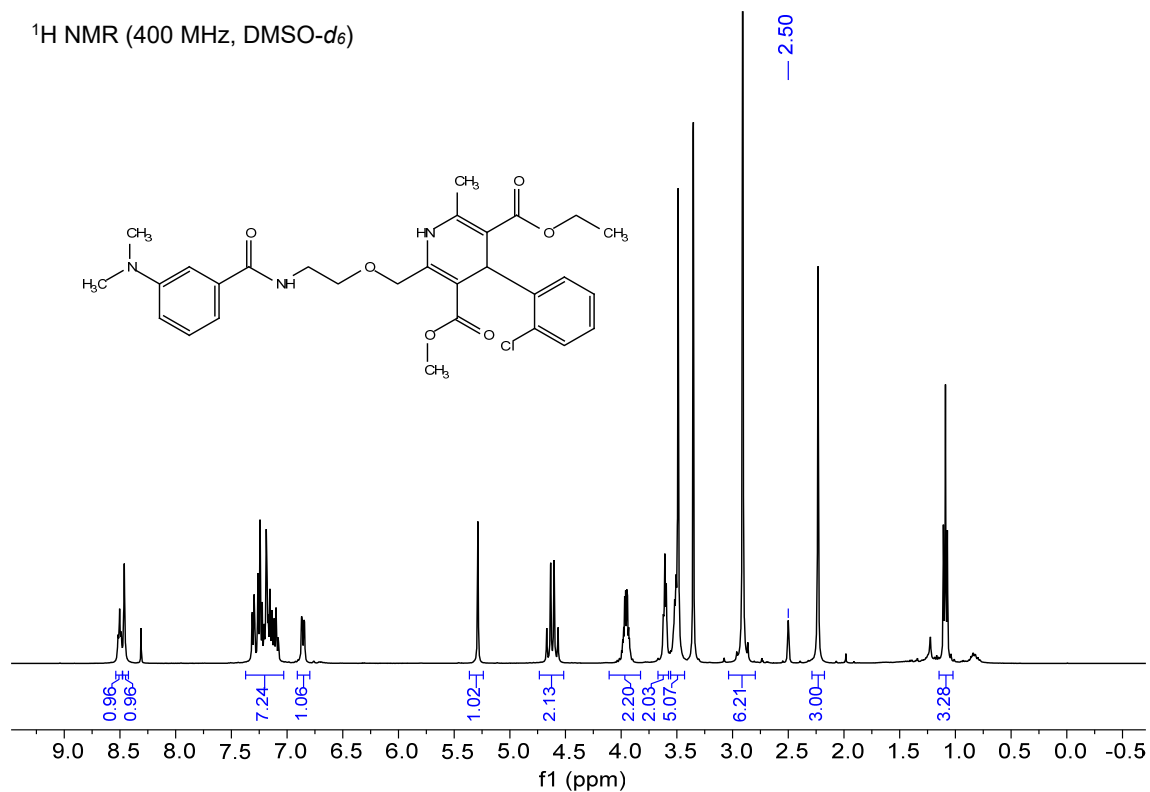

$^{13}\text{C}$  NMR (101 MHz,  $\text{DMSO-}d_6$ )

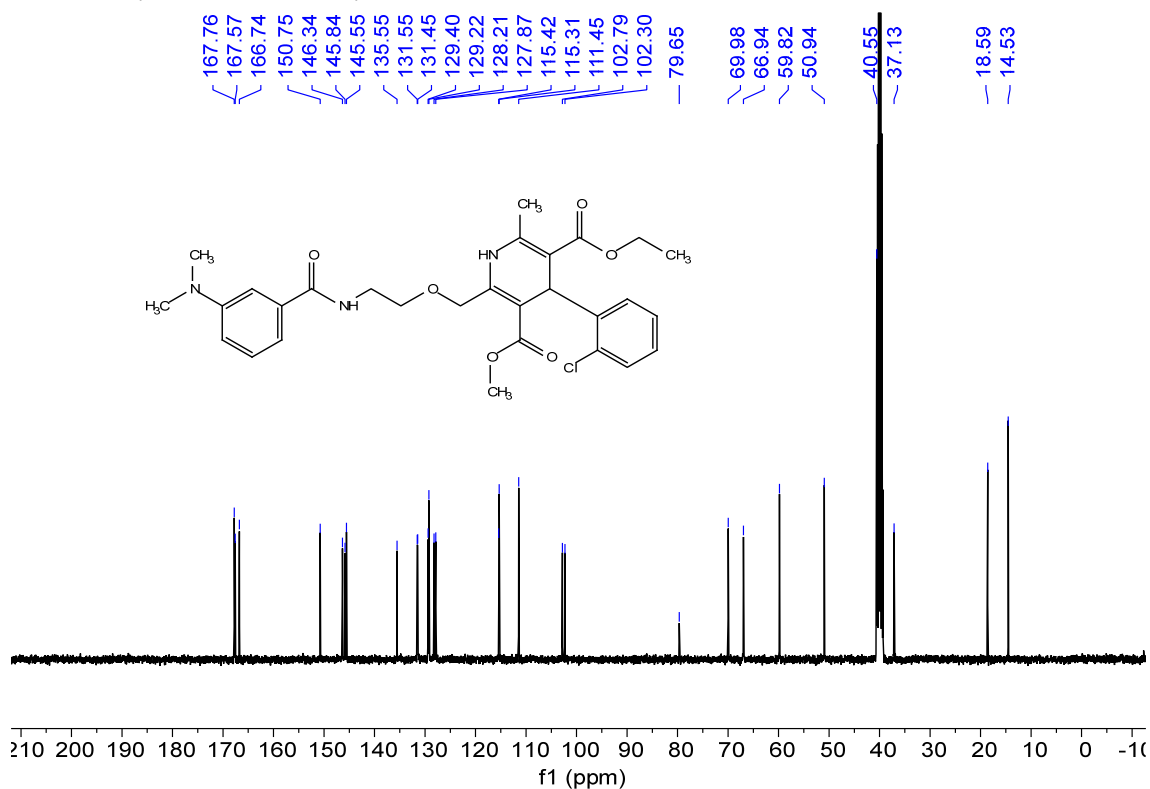

$^1\text{H}$  NMR and  $^{13}\text{C}$  NMR spectrum of **3aq**

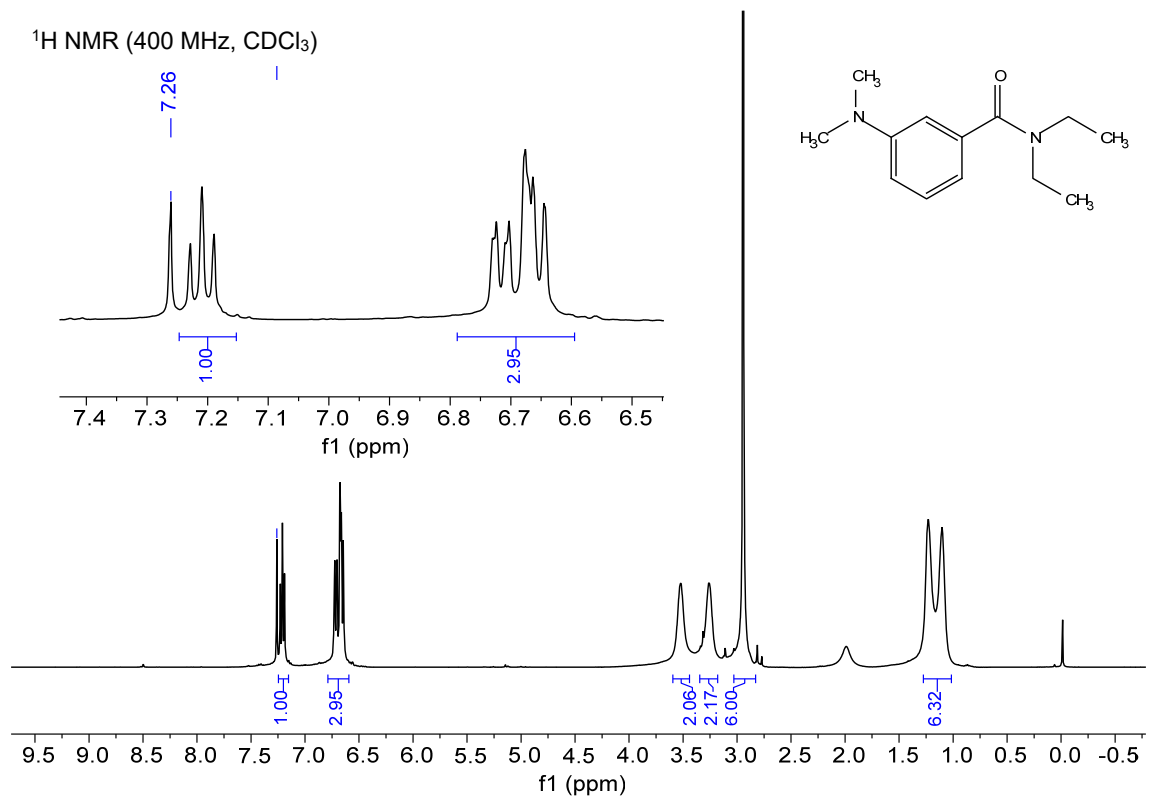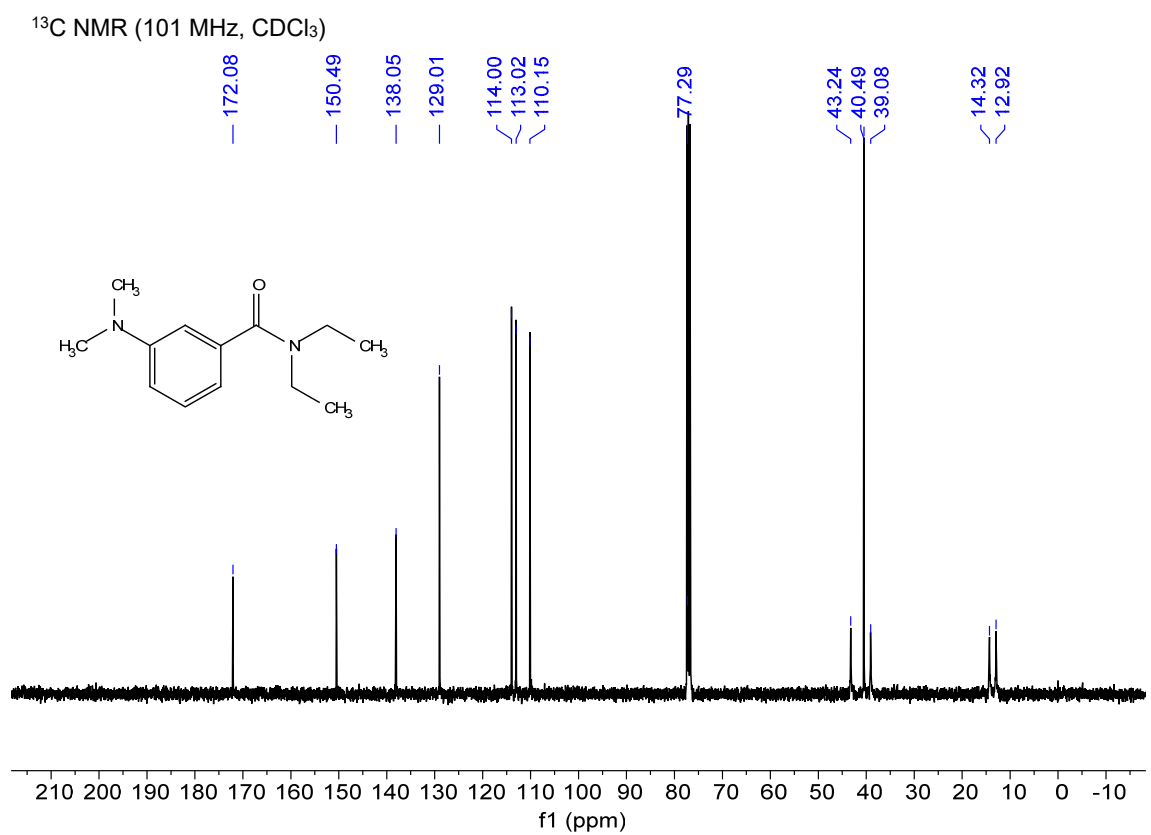

<sup>1</sup>H NMR and <sup>13</sup>C NMR spectrum of 4aa

$^1\text{H}$  NMR (400 MHz,  $\text{CDCl}_3$ )

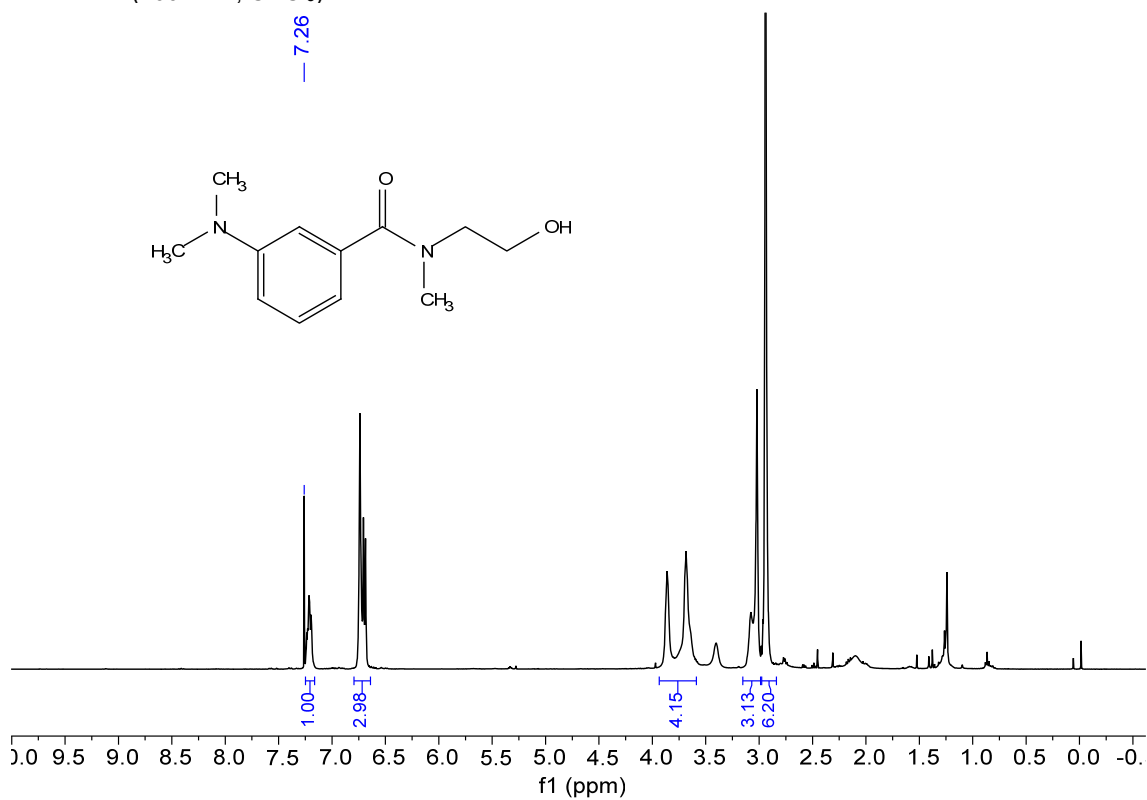

$^{13}\text{C}$  NMR (101 MHz,  $\text{CDCl}_3$ )

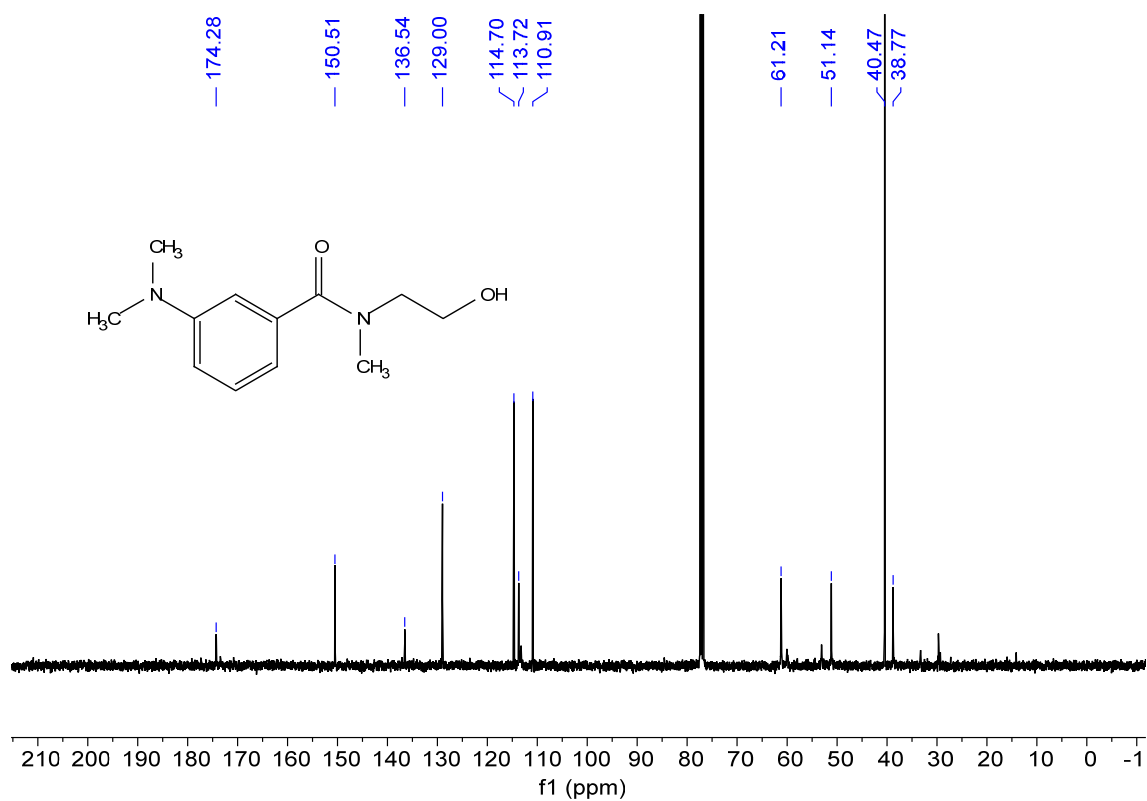

$^1\text{H}$  NMR and  $^{13}\text{C}$  NMR spectrum of **4ab**



<sup>1</sup>H NMR (400 MHz, CDCl<sub>3</sub>)

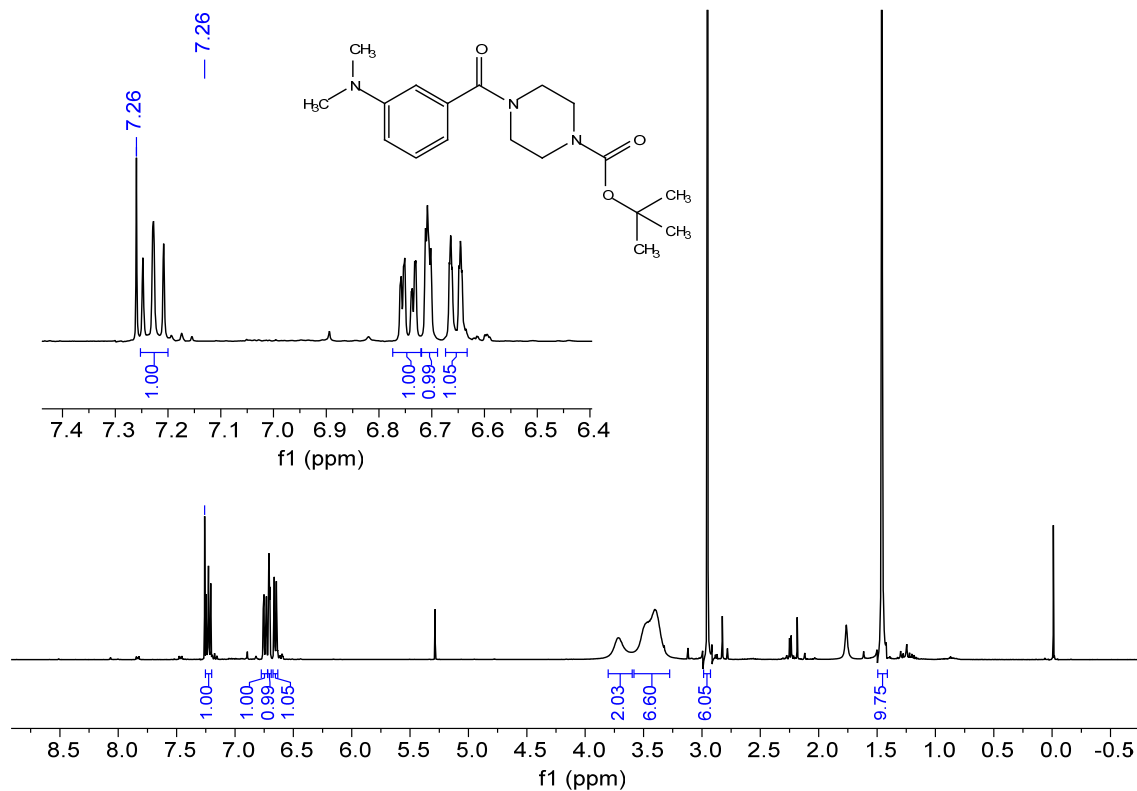

<sup>13</sup>C NMR (101 MHz, CDCl<sub>3</sub>)

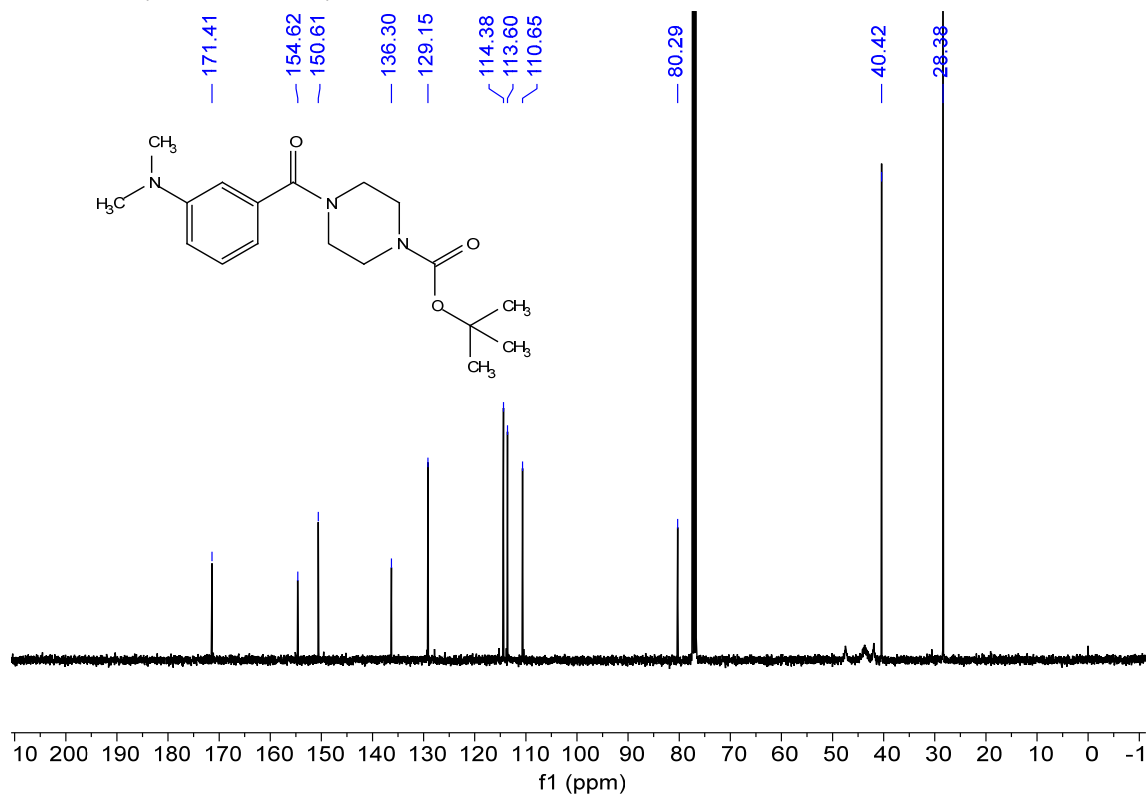

<sup>1</sup>H NMR and <sup>13</sup>C NMR spectrum of 4ad



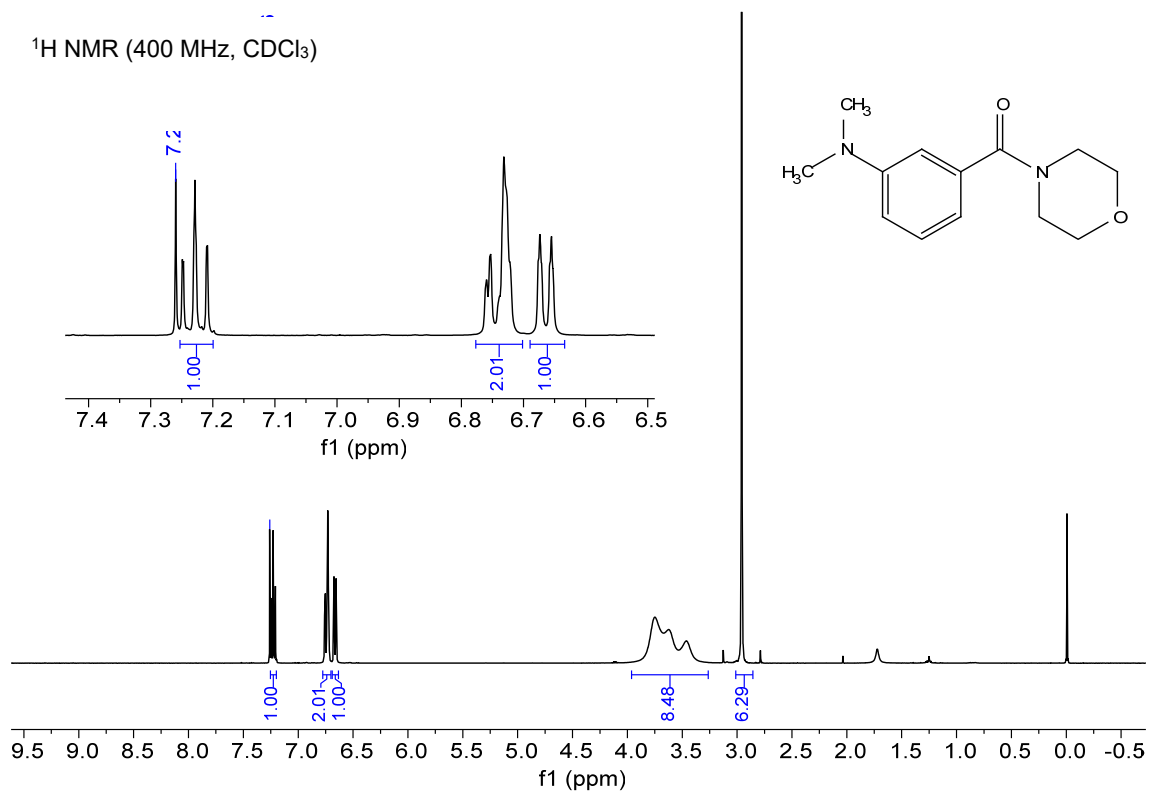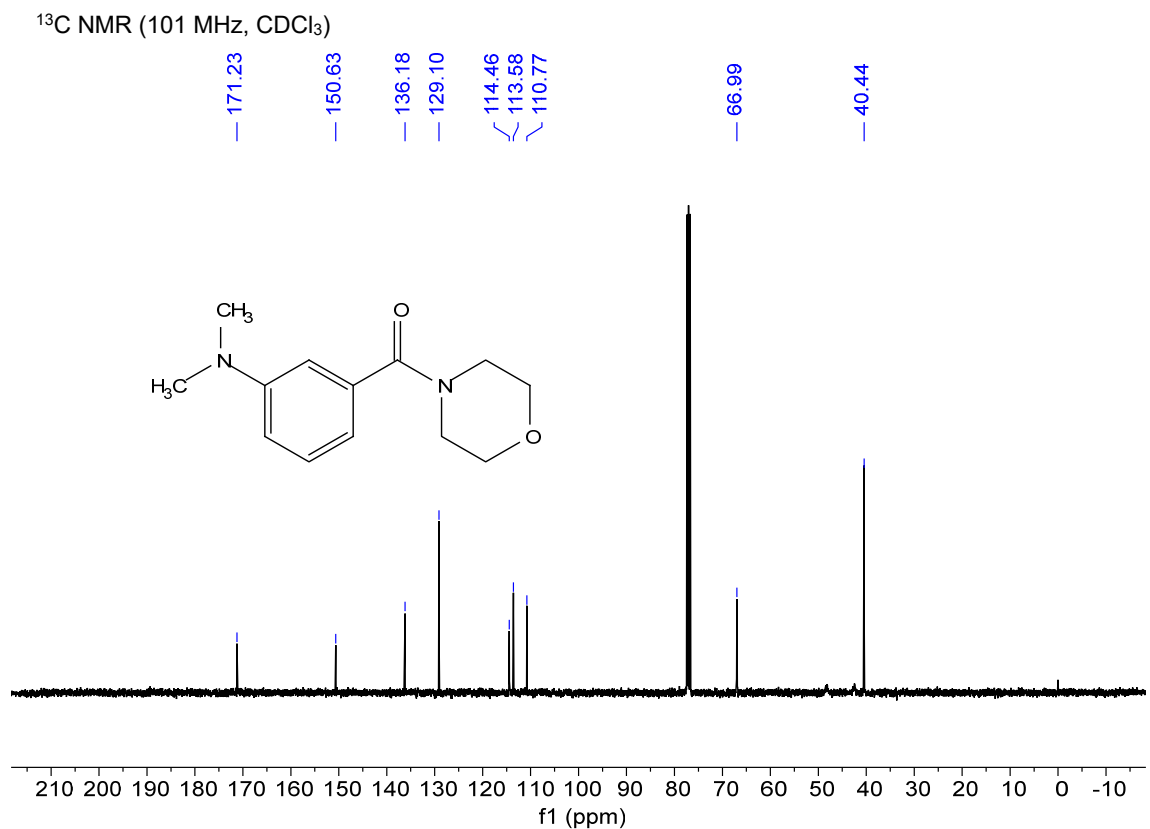

<sup>1</sup>H NMR and <sup>13</sup>C NMR spectrum of **4ae**

<sup>1</sup>H NMR (400 MHz, CDCl<sub>3</sub>)

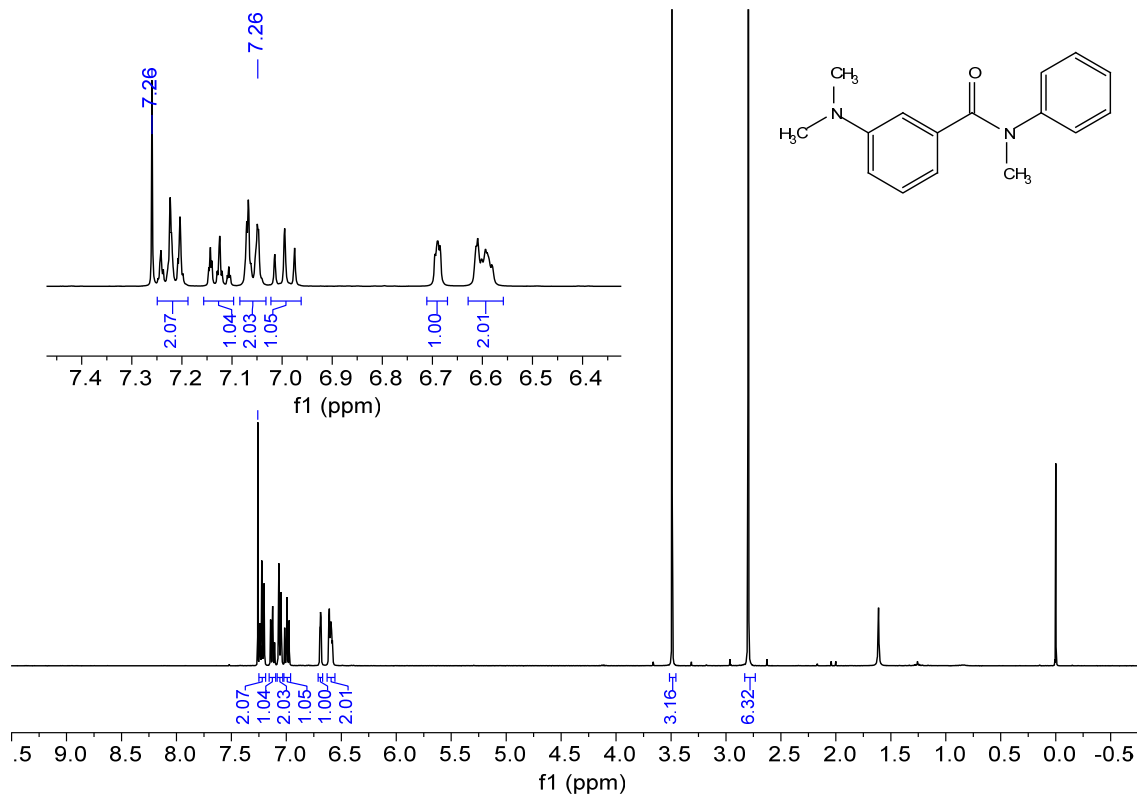

<sup>13</sup>C NMR (101 MHz, CDCl<sub>3</sub>)

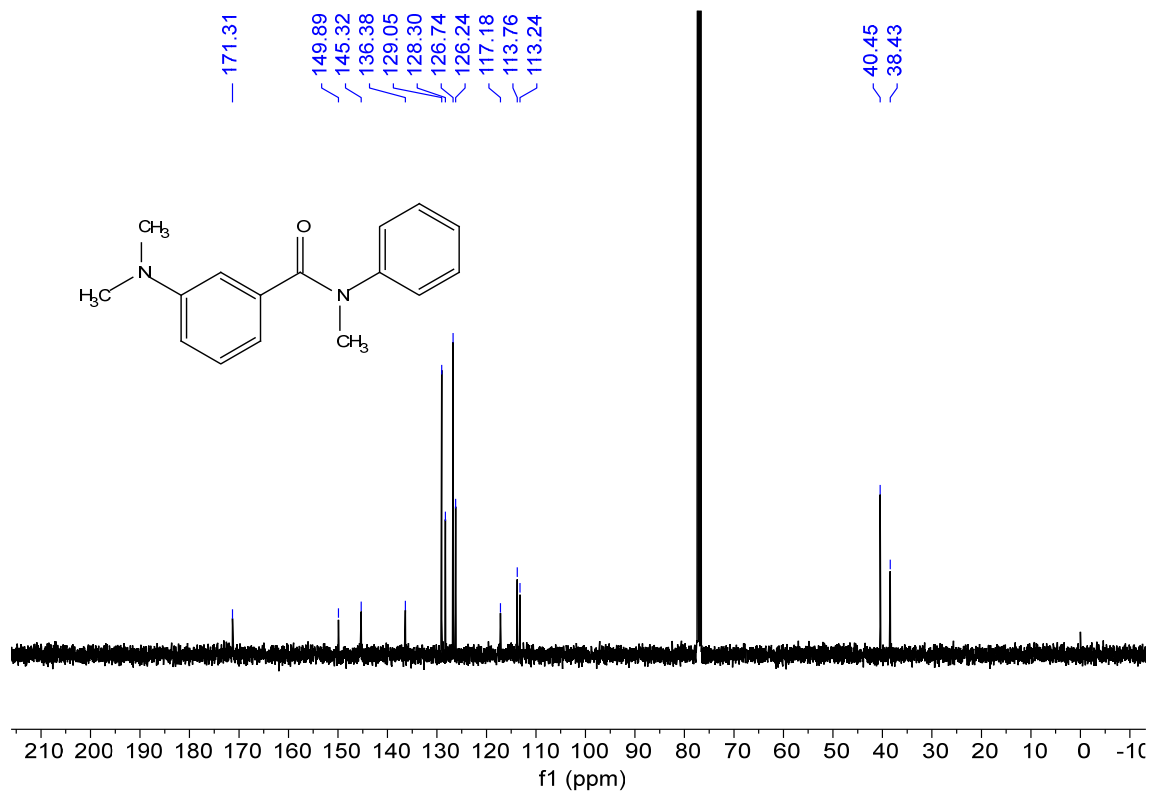

<sup>1</sup>H NMR and <sup>13</sup>C NMR spectrum of 4af

$^1\text{H}$  NMR (400 MHz,  $\text{DMSO-}d_6$ )

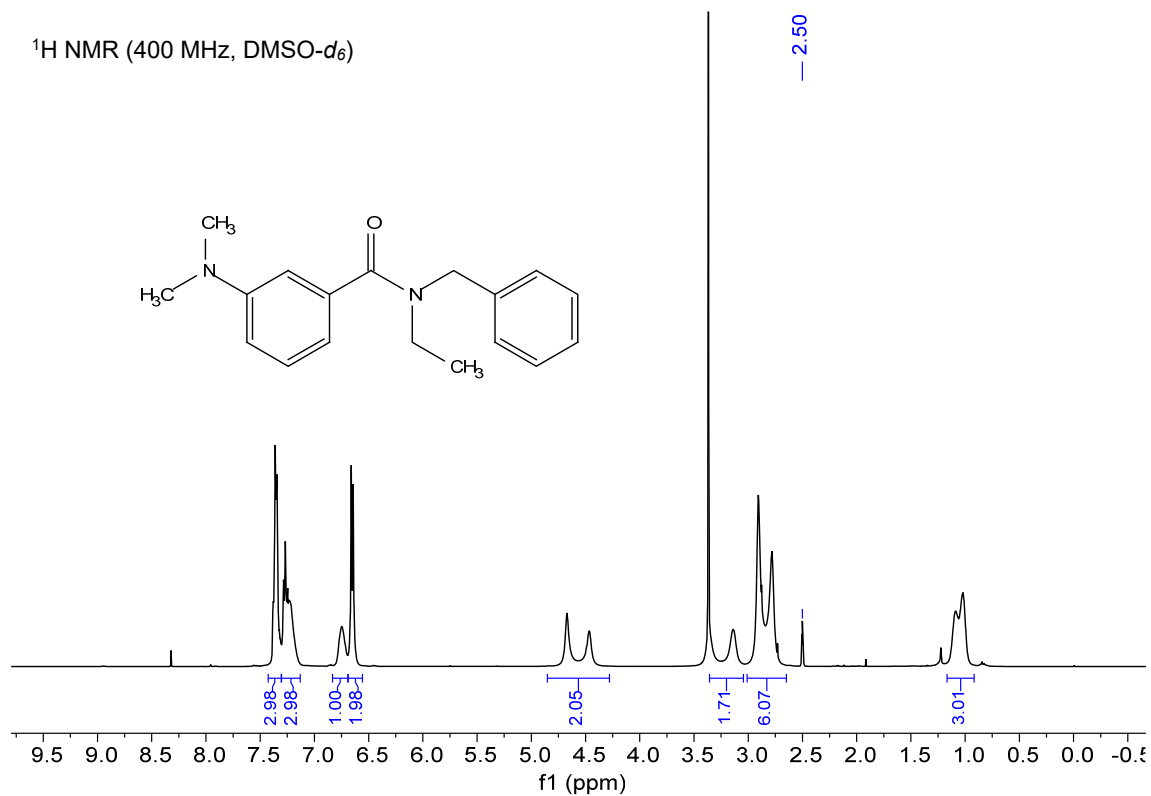

$^{13}\text{C}$  NMR (101 MHz,  $\text{CDCl}_3$ )

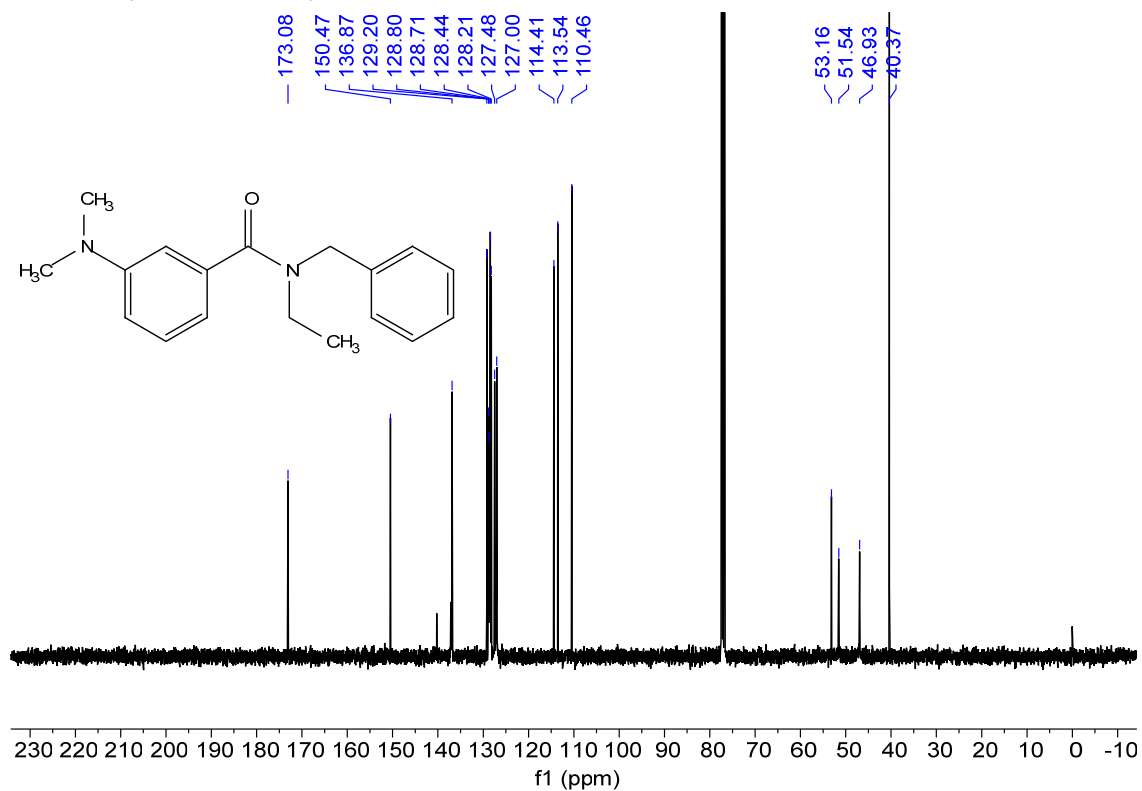

$^1\text{H}$  NMR and  $^{13}\text{C}$  NMR spectrum of **4ag**

<sup>1</sup>H NMR (400 MHz, CDCl<sub>3</sub>)

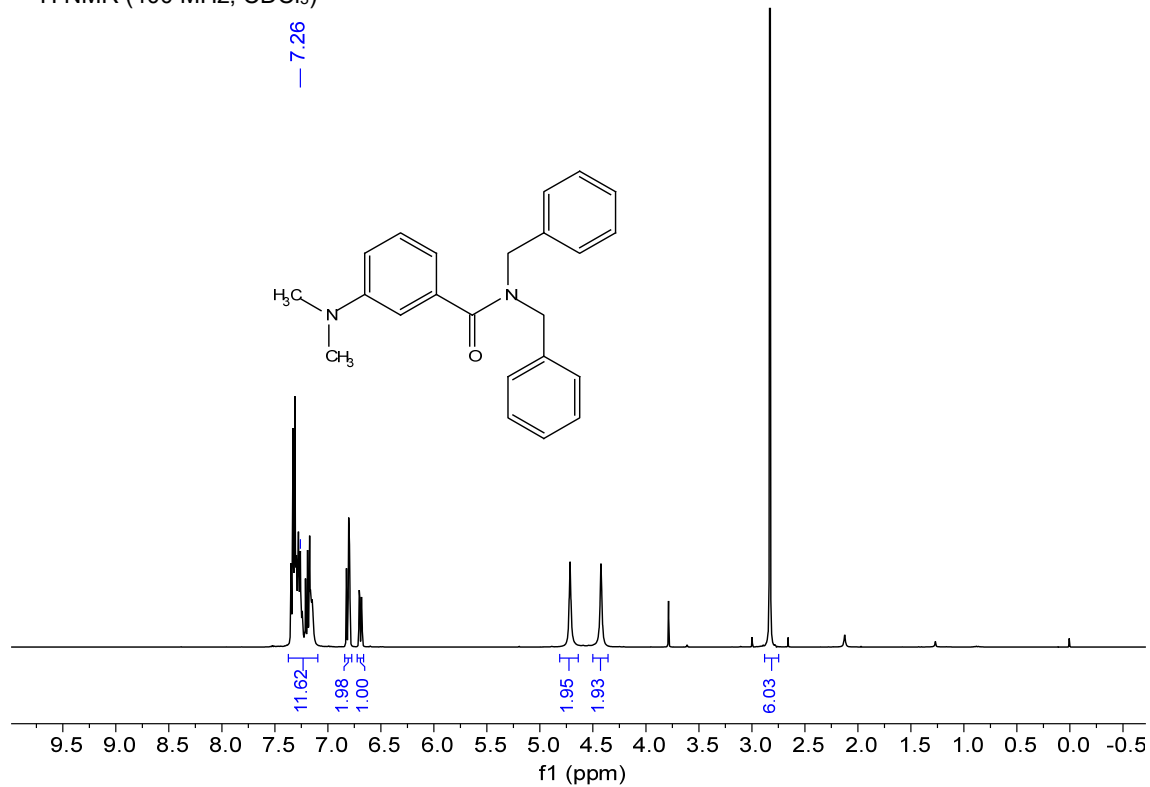

<sup>13</sup>C NMR (101 MHz, CDCl<sub>3</sub>)

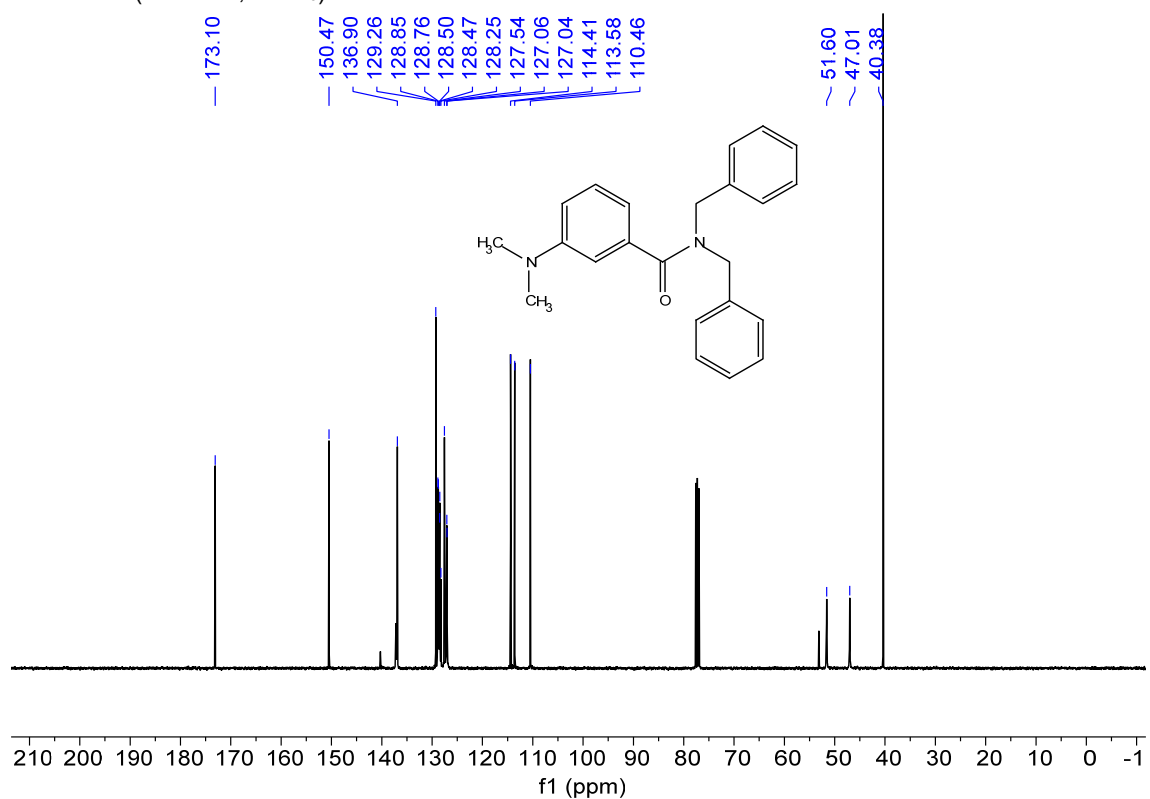

<sup>1</sup>H NMR and <sup>13</sup>C NMR spectrum of 4ah

<sup>1</sup>H NMR (400 MHz, DMSO)

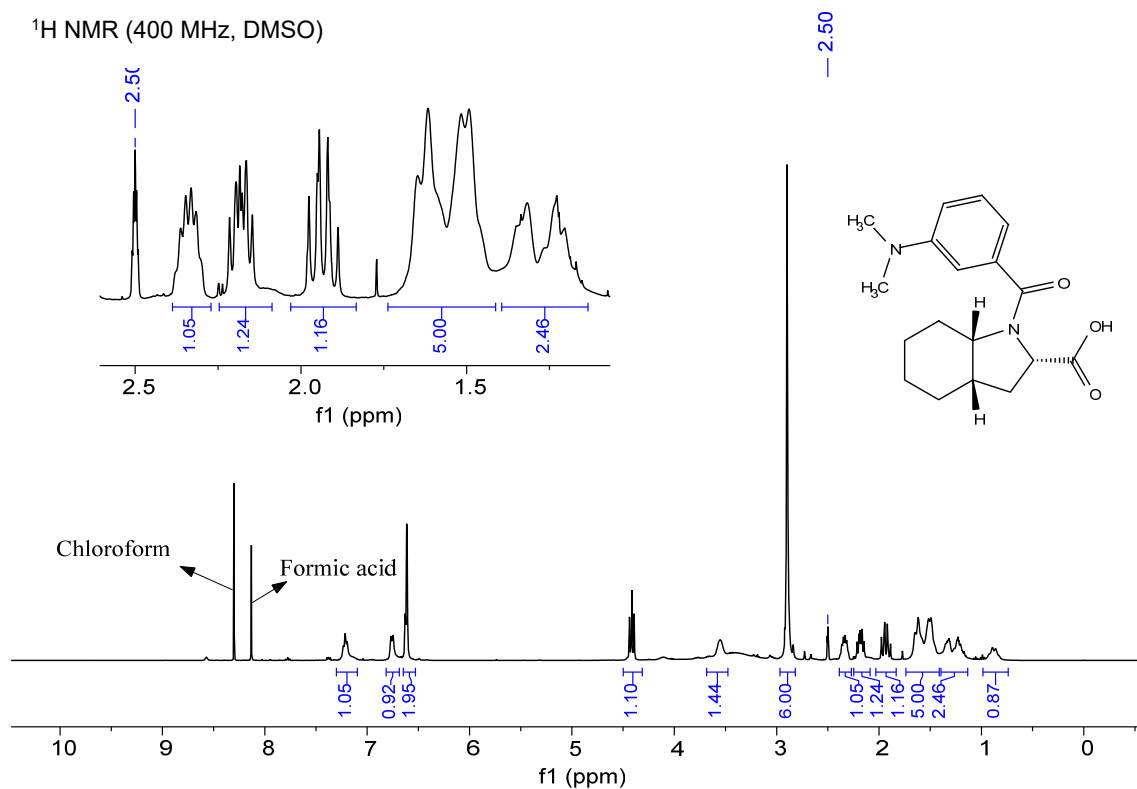

<sup>13</sup>C NMR (101 MHz, DMSO)

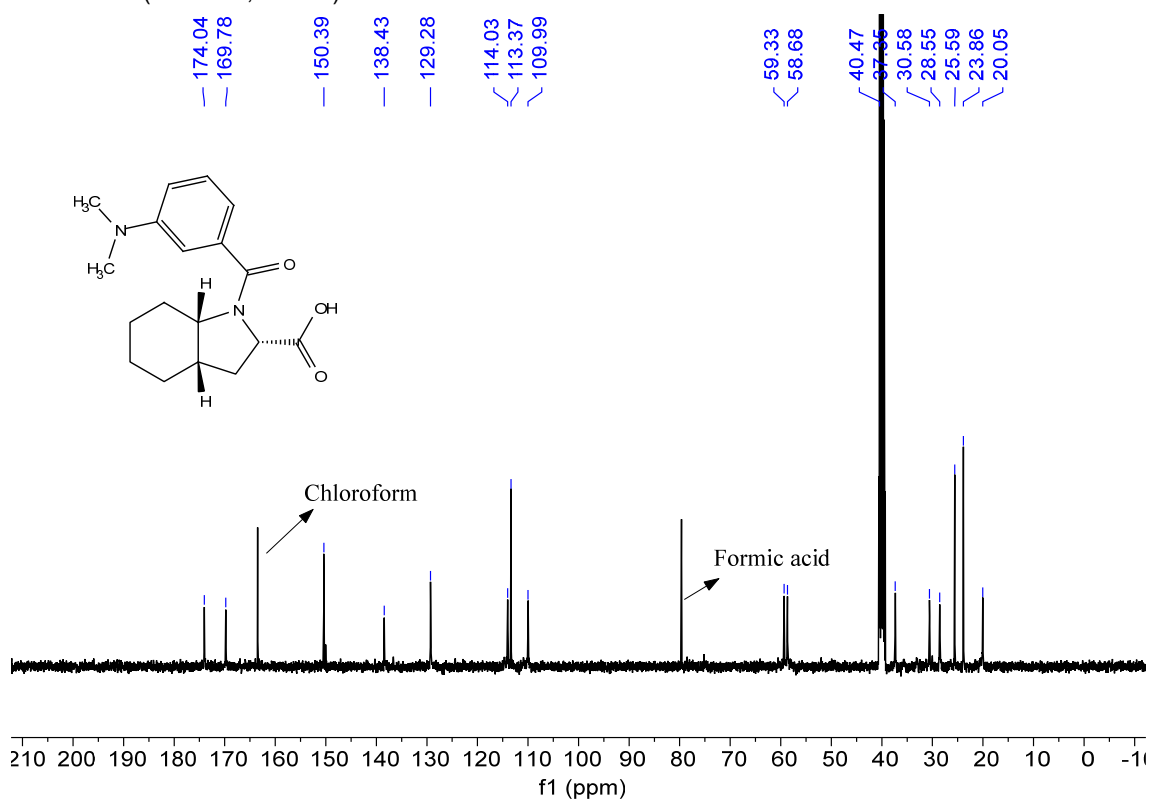

<sup>1</sup>H NMR and <sup>13</sup>C NMR spectrum of 4ai

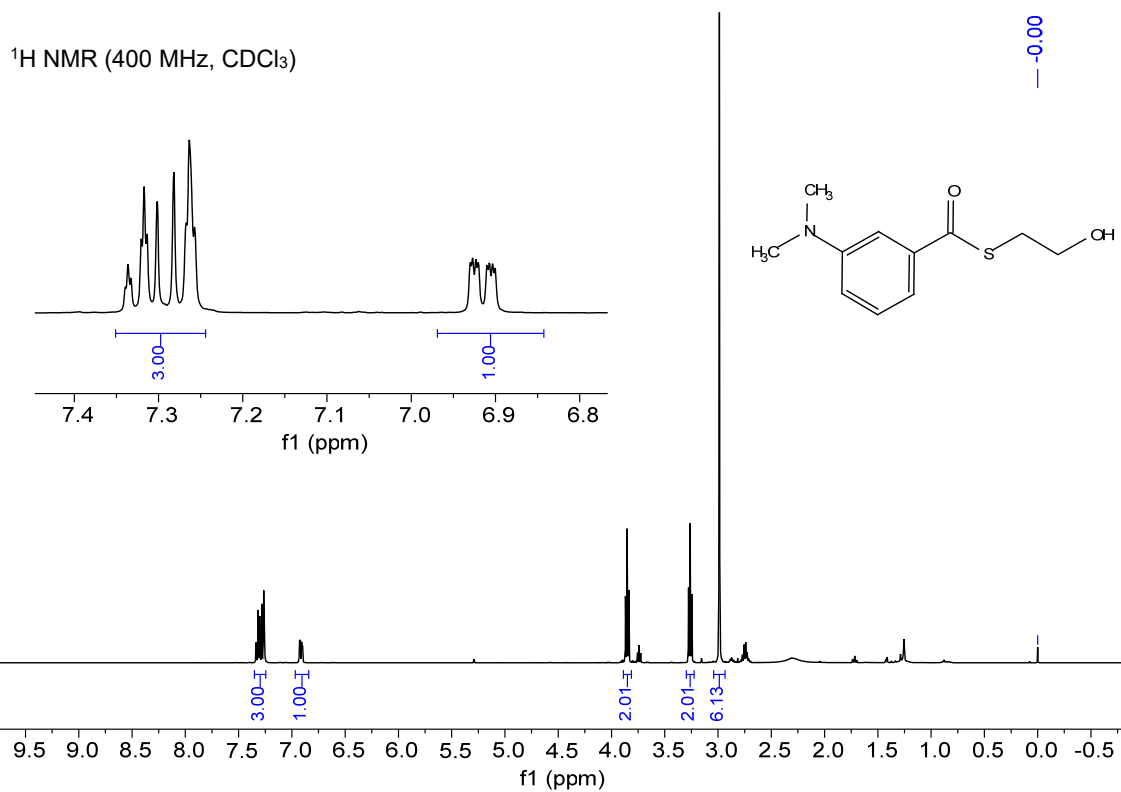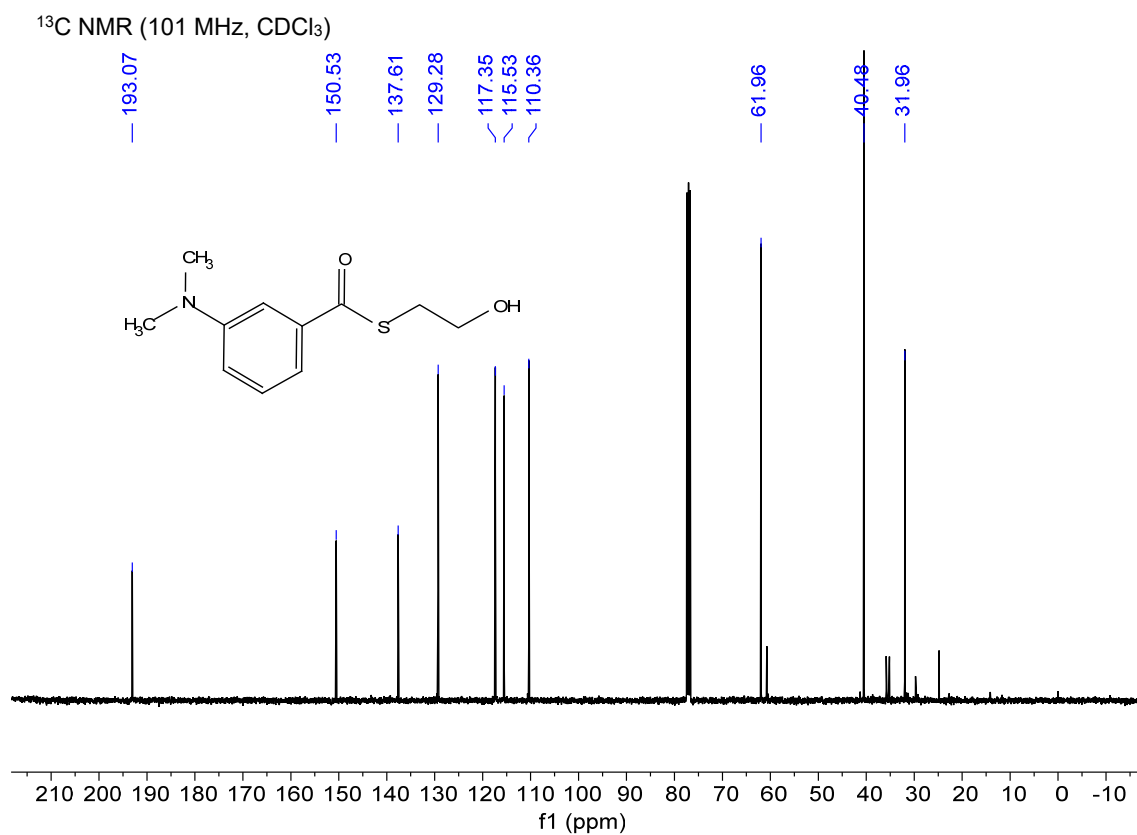

<sup>1</sup>H NMR and <sup>13</sup>C NMR spectrum of 5aa

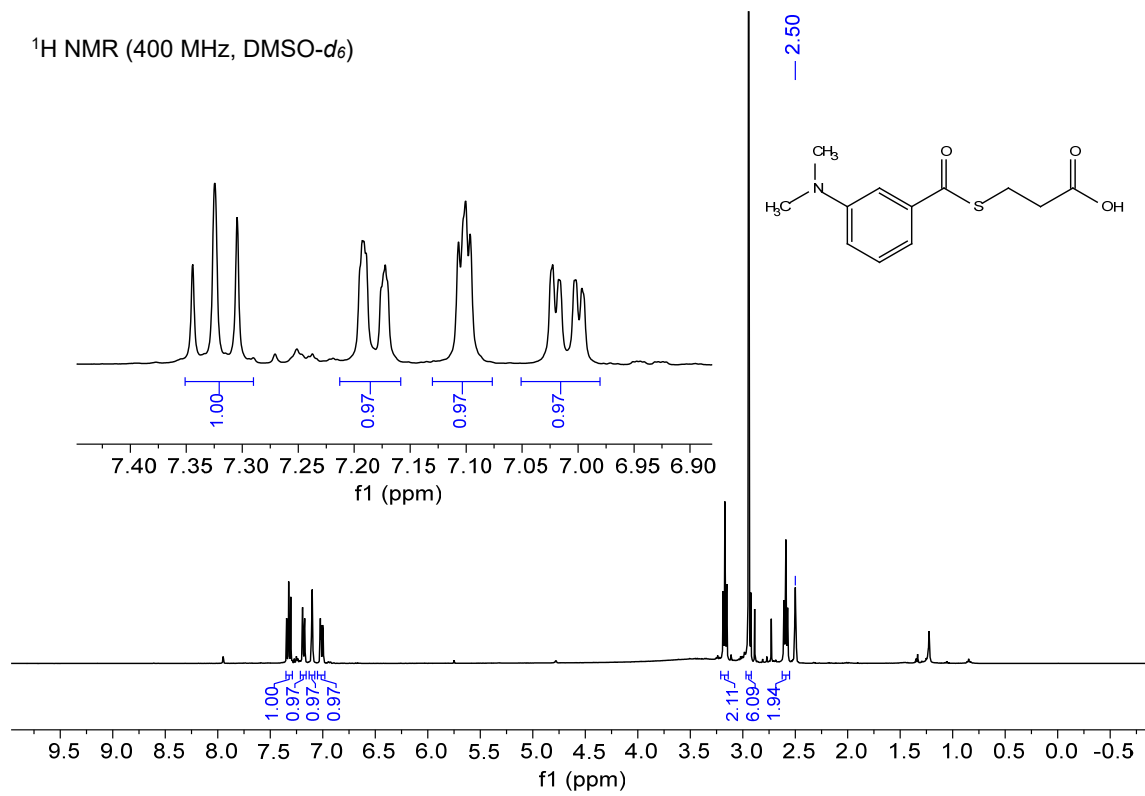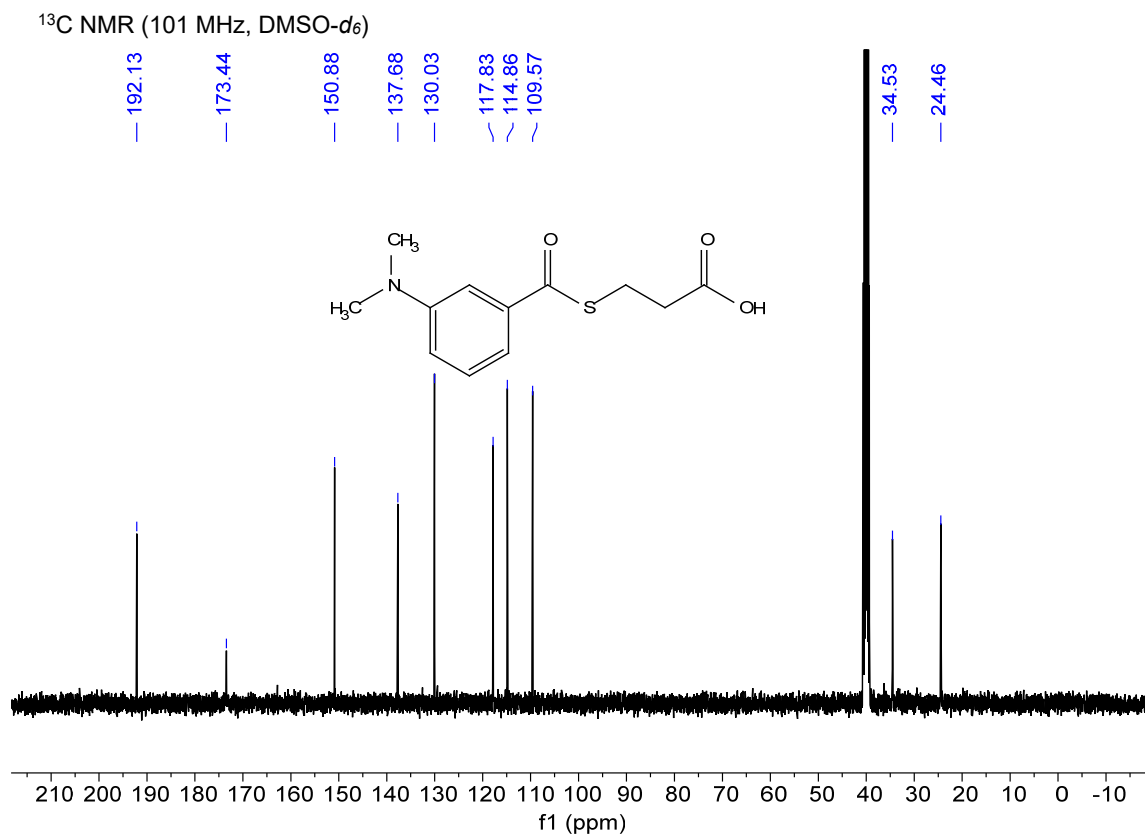

<sup>1</sup>H NMR and <sup>13</sup>C NMR spectrum of **5ab**

$^1\text{H}$  NMR (400 MHz,  $\text{CDCl}_3$ )

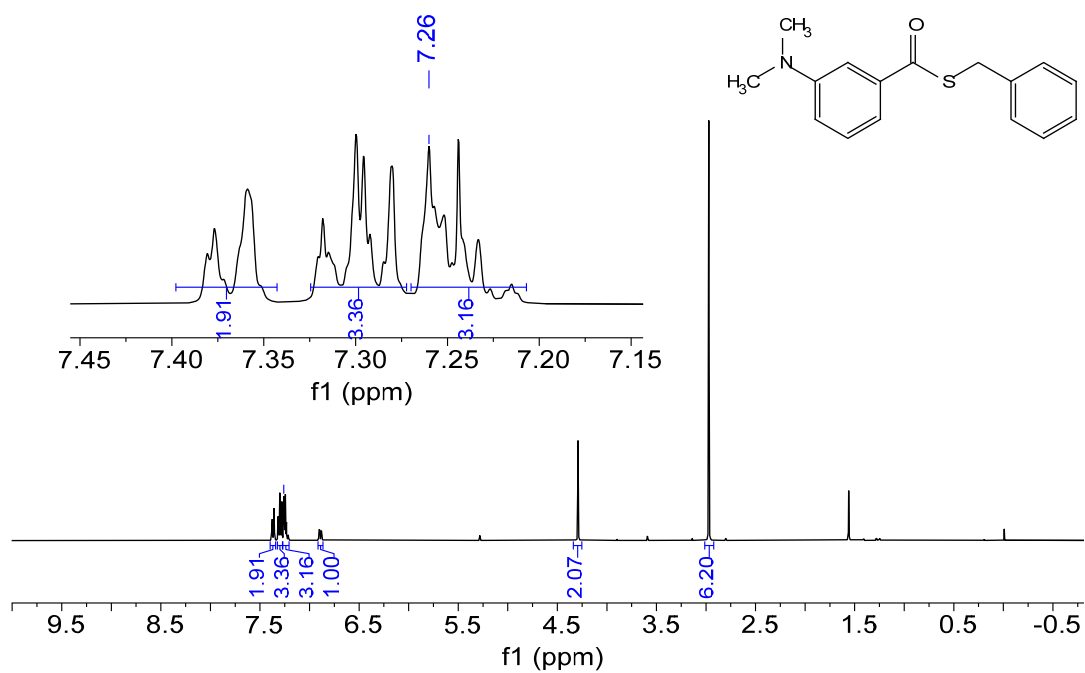

$^{13}\text{C}$  NMR (101 MHz,  $\text{CDCl}_3$ )

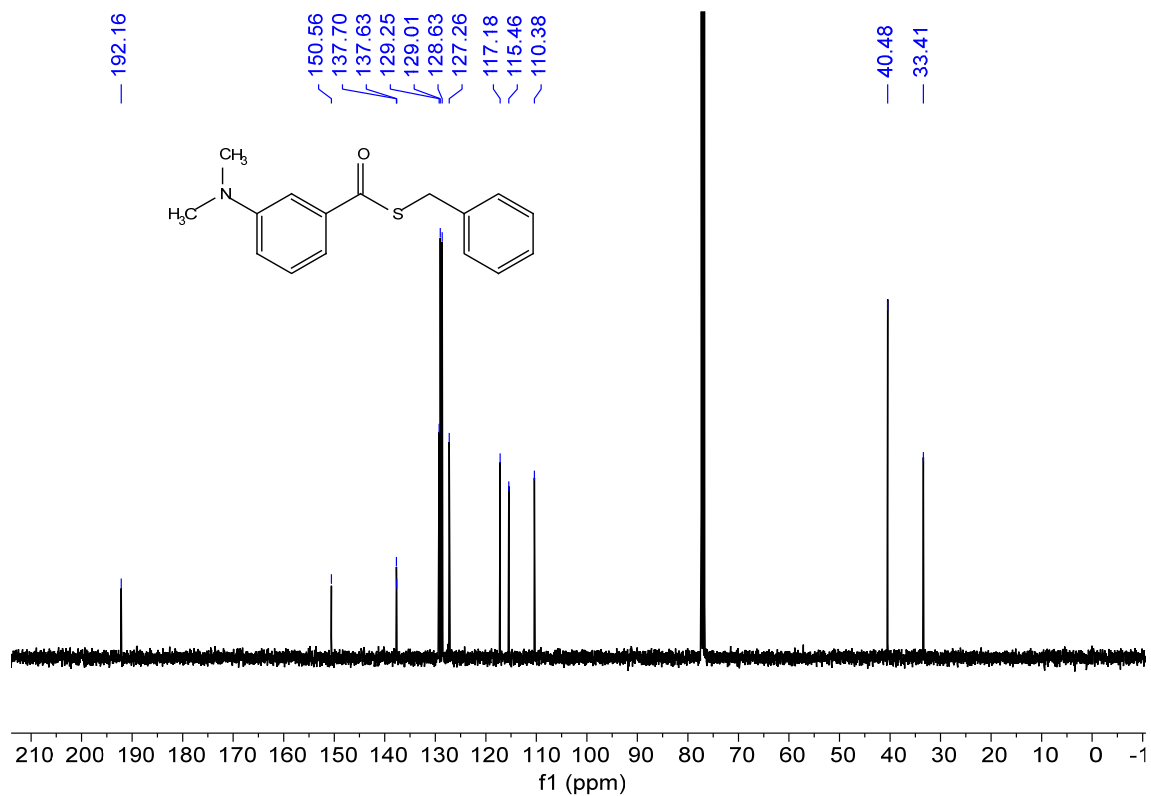

$^1\text{H}$  NMR and  $^{13}\text{C}$  NMR spectrum of 5ac





<sup>1</sup>H NMR (400 MHz, DMSO-d<sub>6</sub>)

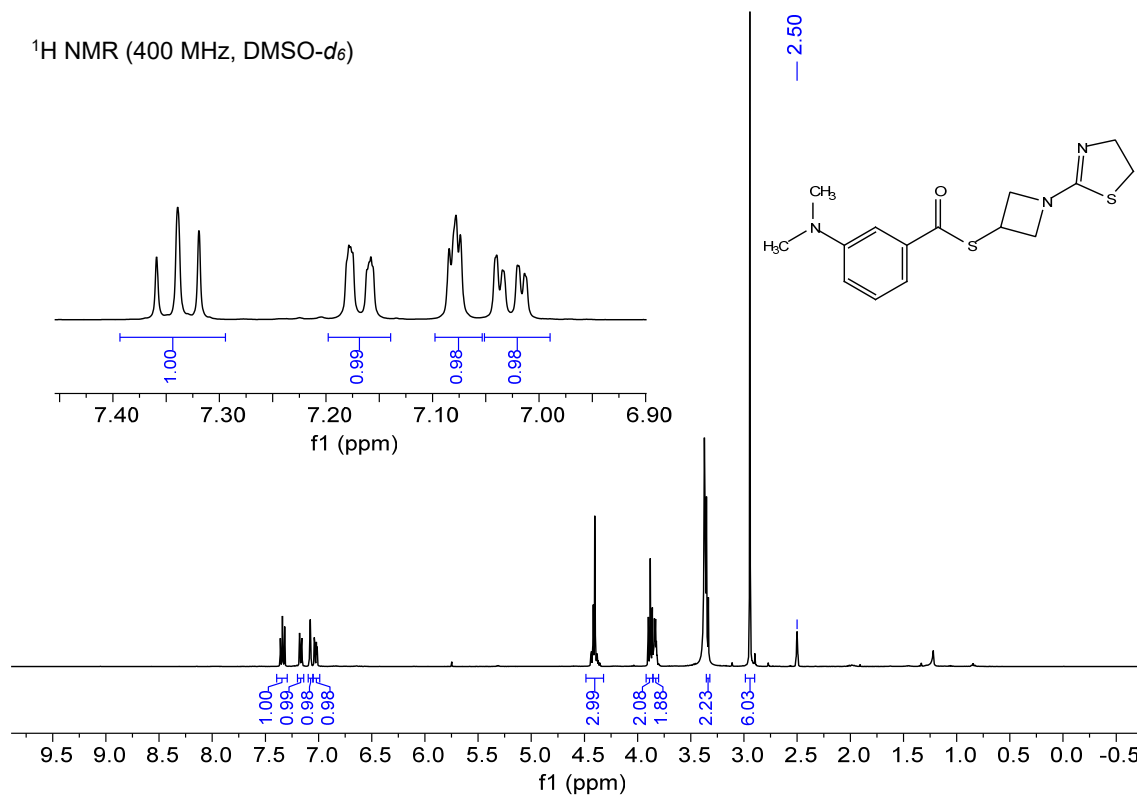

<sup>13</sup>C NMR (101 MHz, DMSO-d<sub>6</sub>)

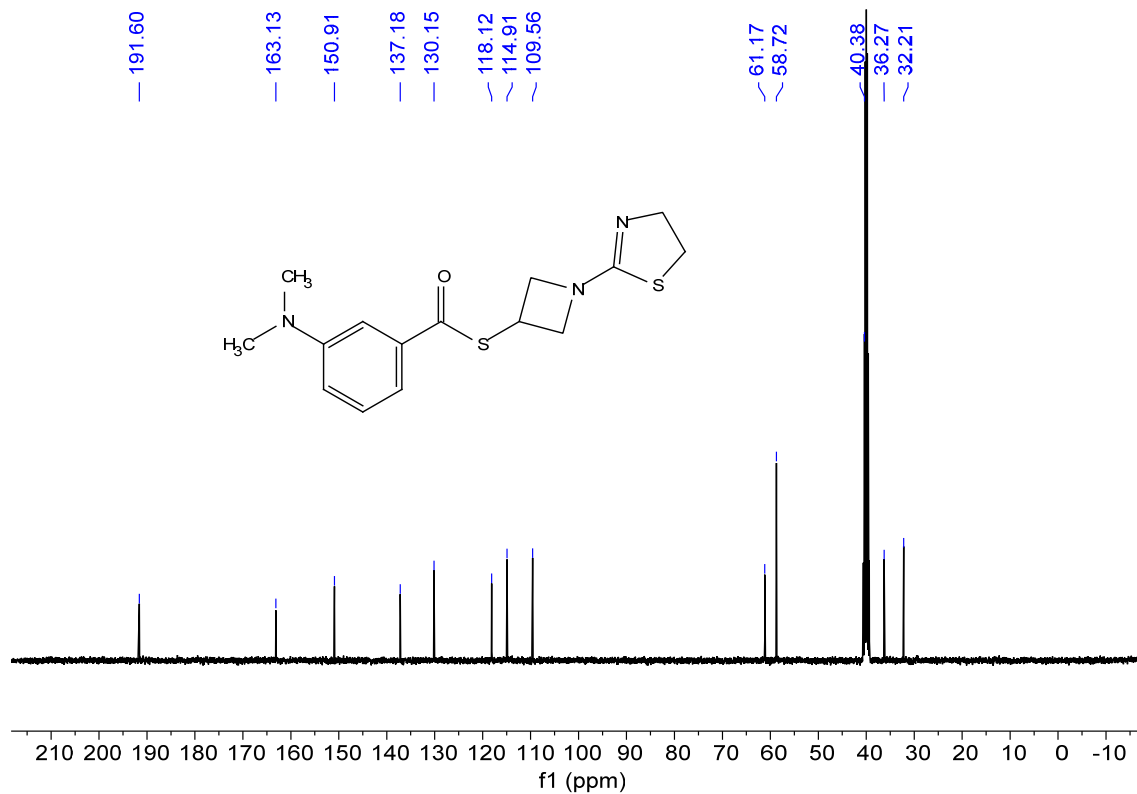

<sup>1</sup>H NMR and <sup>13</sup>C NMR spectrum of 5ae

<sup>1</sup>H NMR (400 MHz, DMSO-*d*<sub>6</sub>)

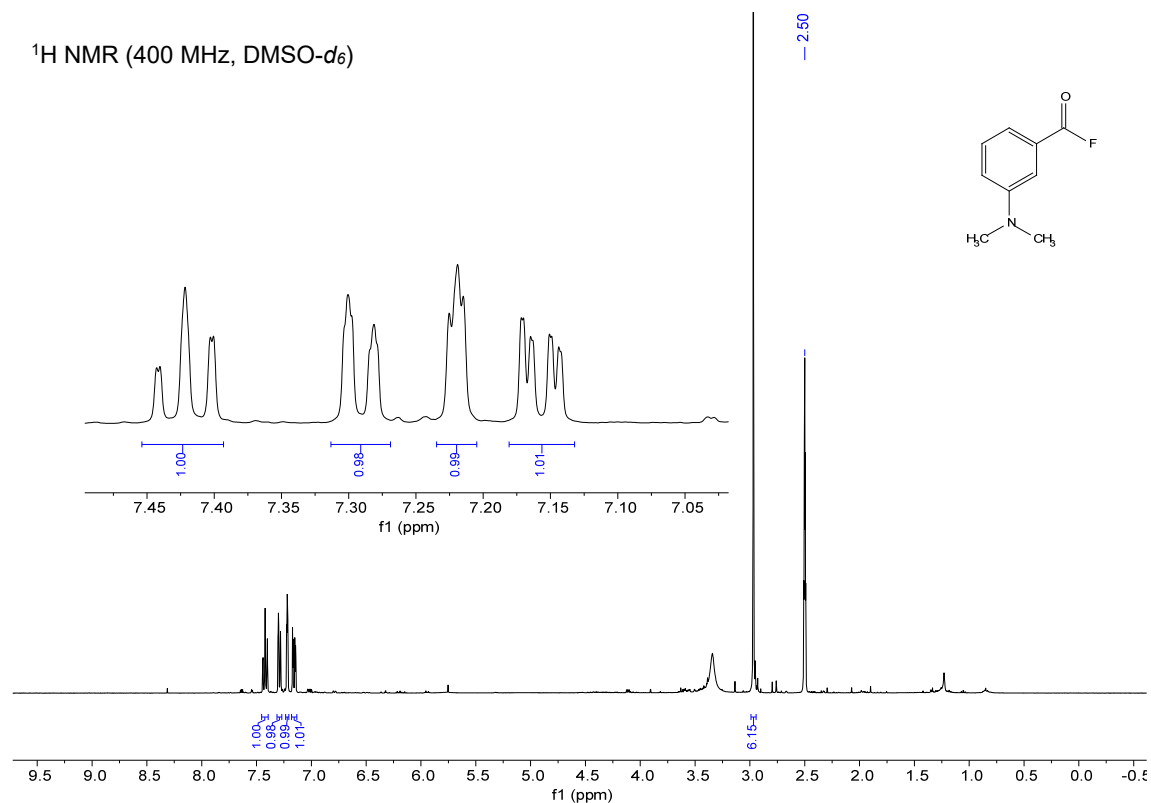

<sup>1</sup>H NMR spectrum of 5a

<sup>13</sup>C NMR (101 MHz, DMSO-*d*<sub>6</sub>)

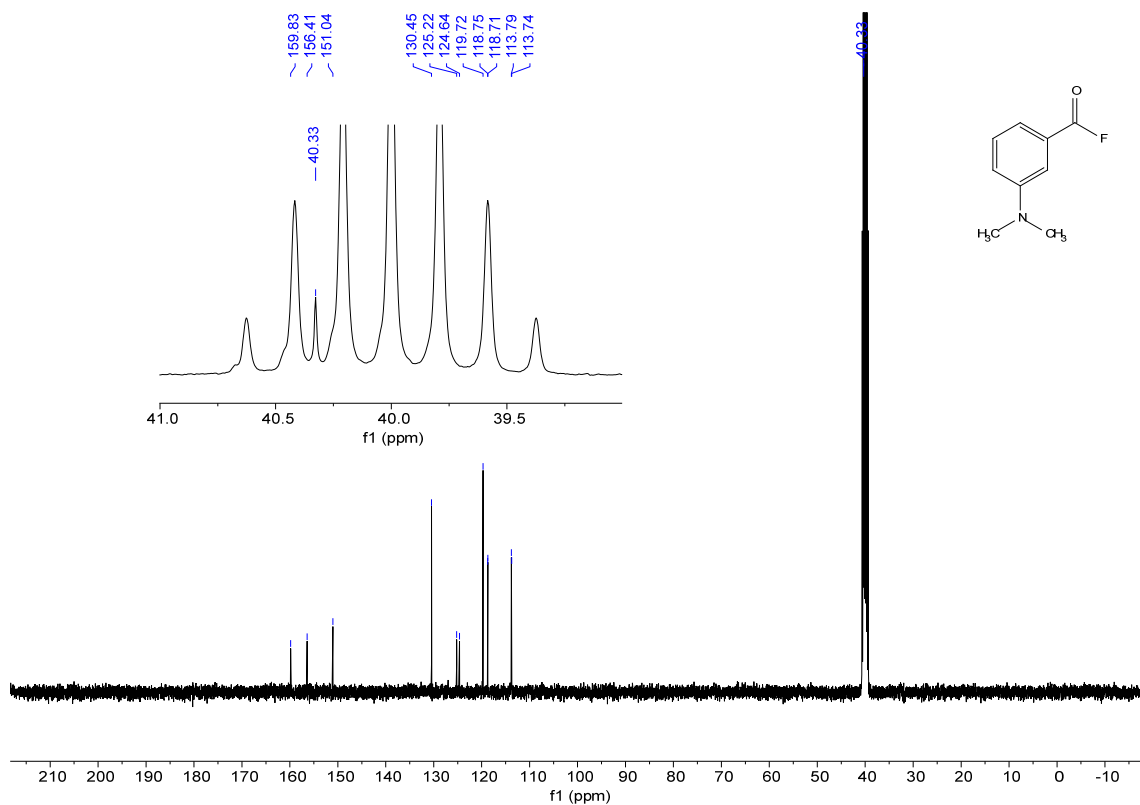

<sup>13</sup>C NMR spectrum of 5a

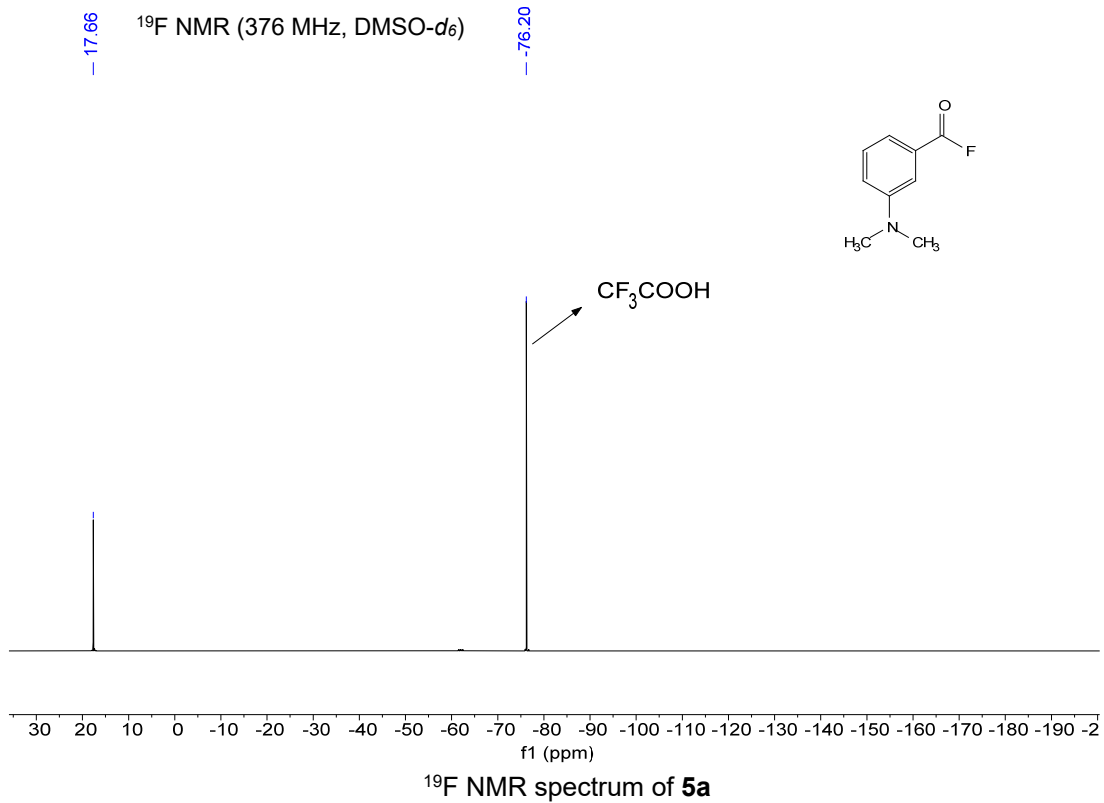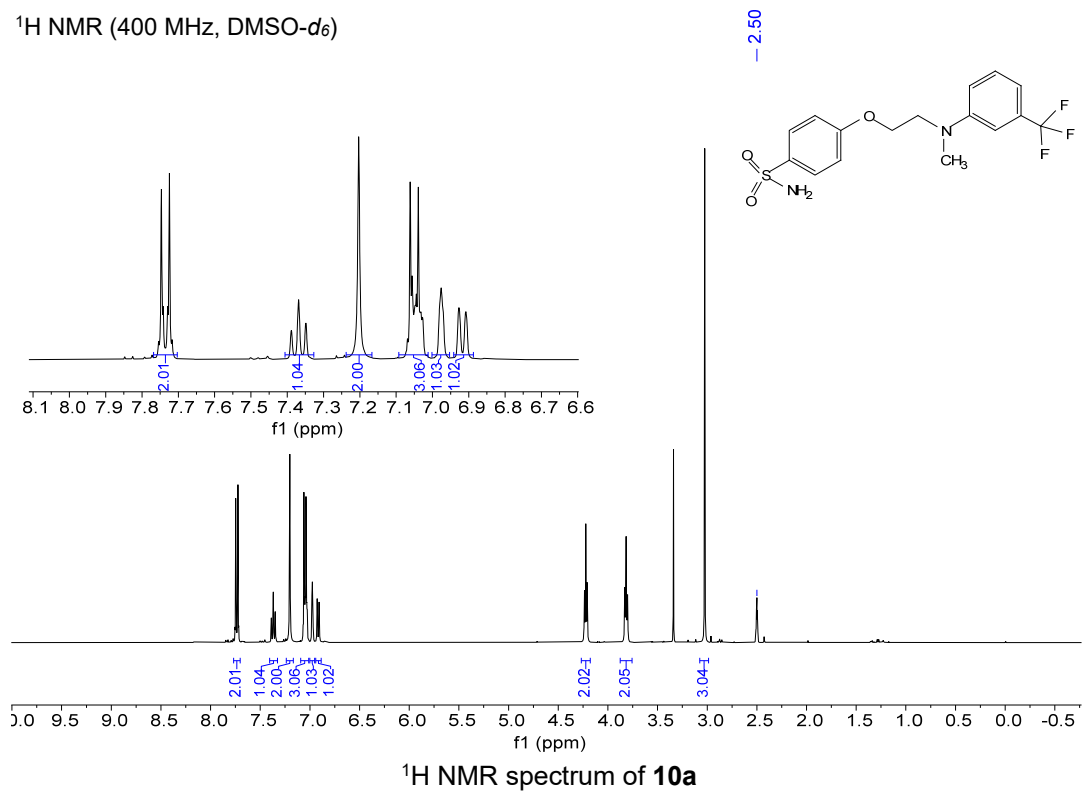

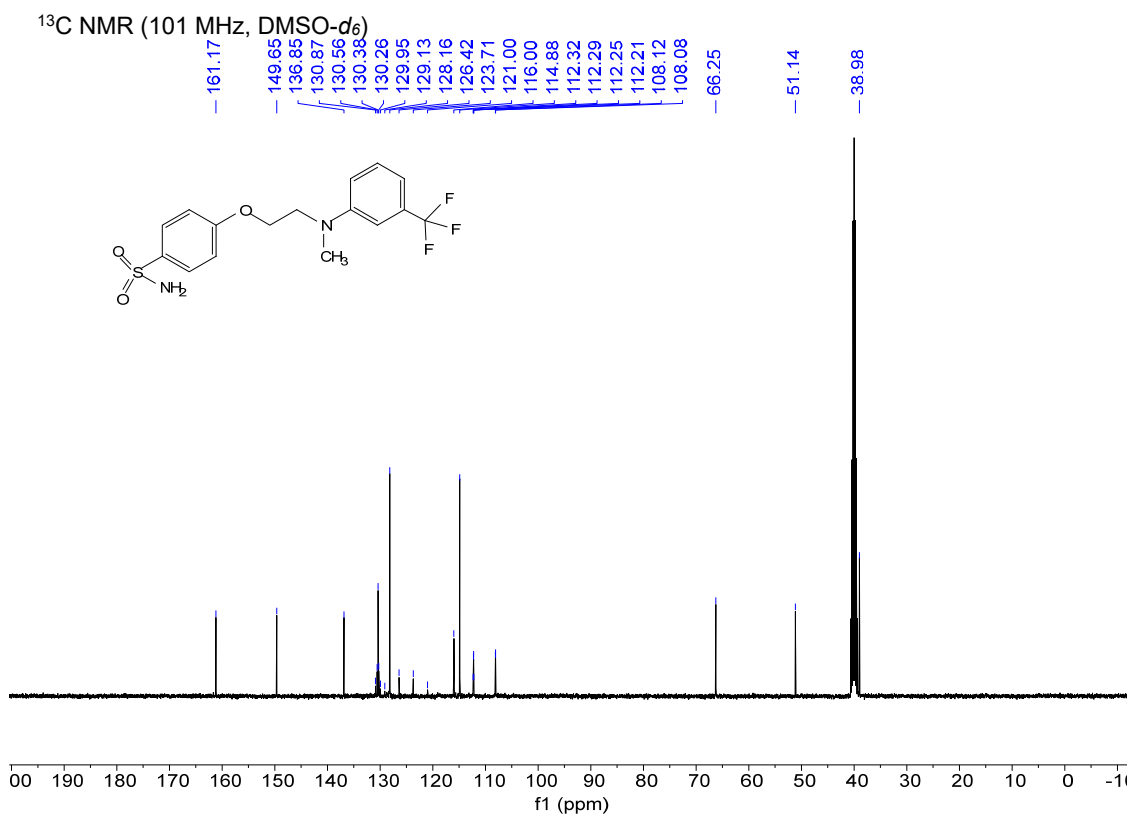

<sup>13</sup>C NMR spectrum of **10a**

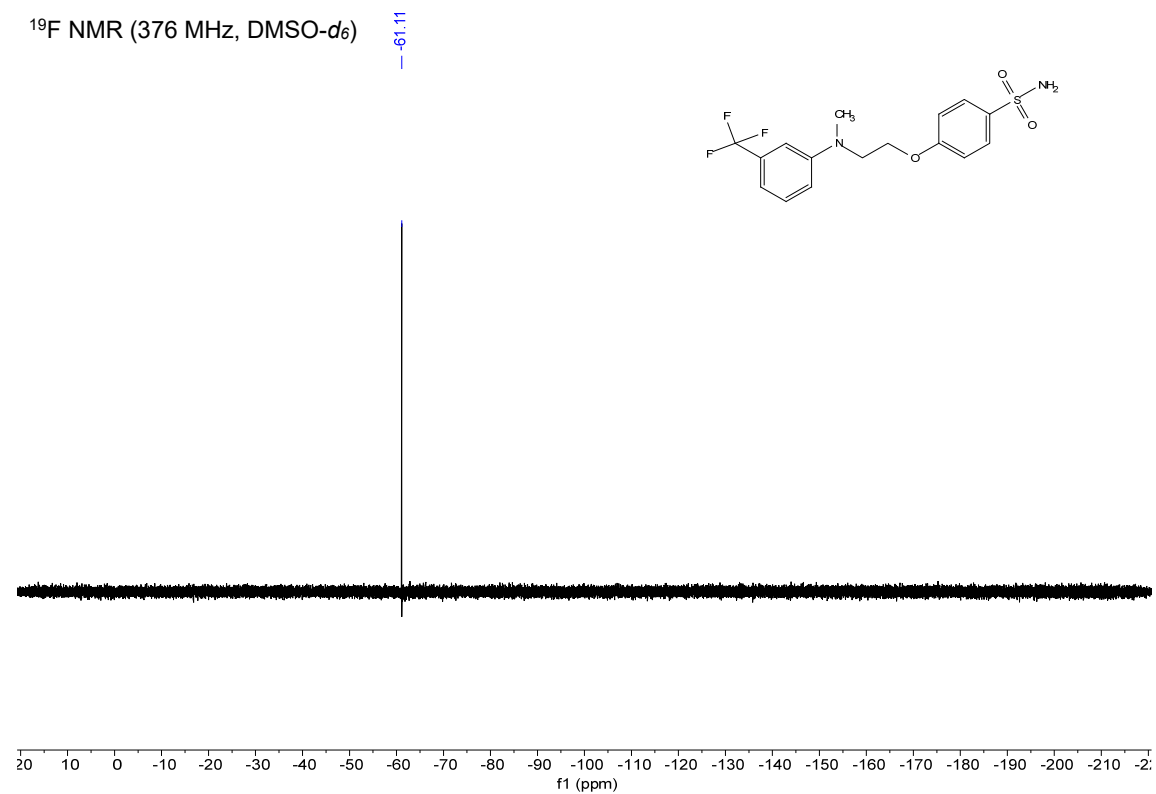

<sup>19</sup>F NMR spectrum of **10a**

<sup>1</sup>H NMR (400 MHz, DMSO-*d*<sub>6</sub>)

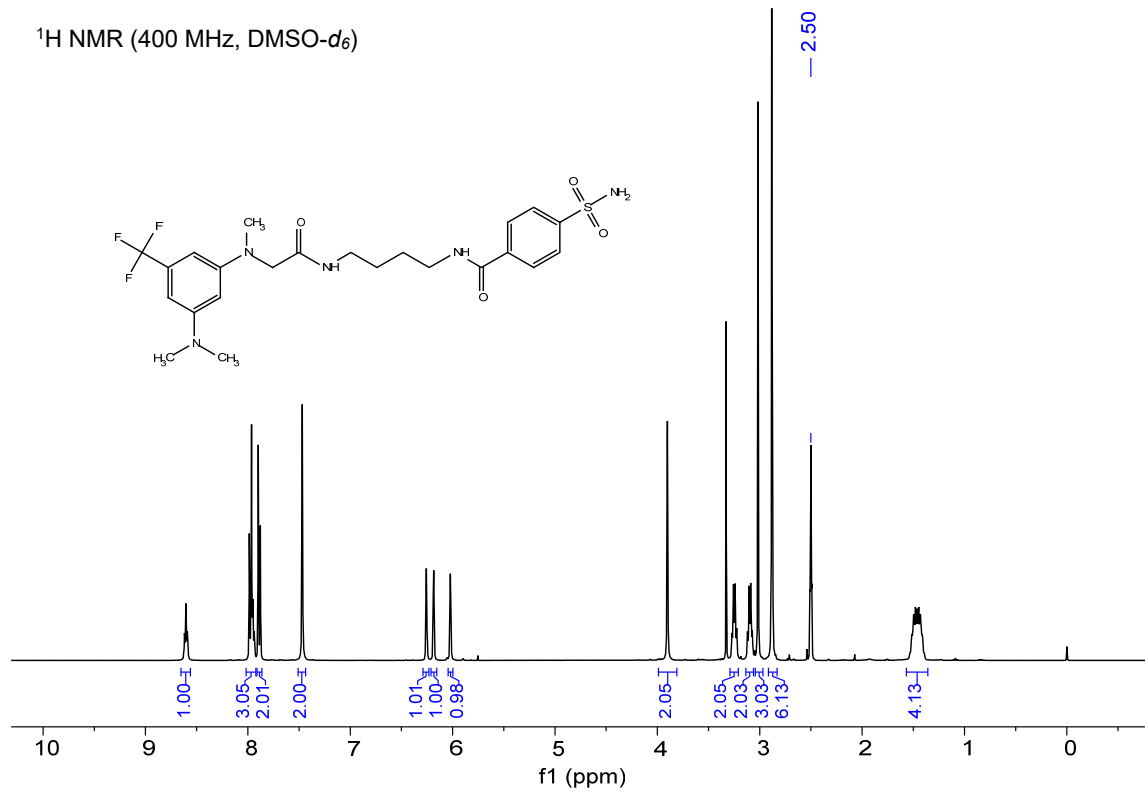

<sup>1</sup>H NMR spectrum of 10b

<sup>13</sup>C NMR (101 MHz, DMSO-*d*<sub>6</sub>)

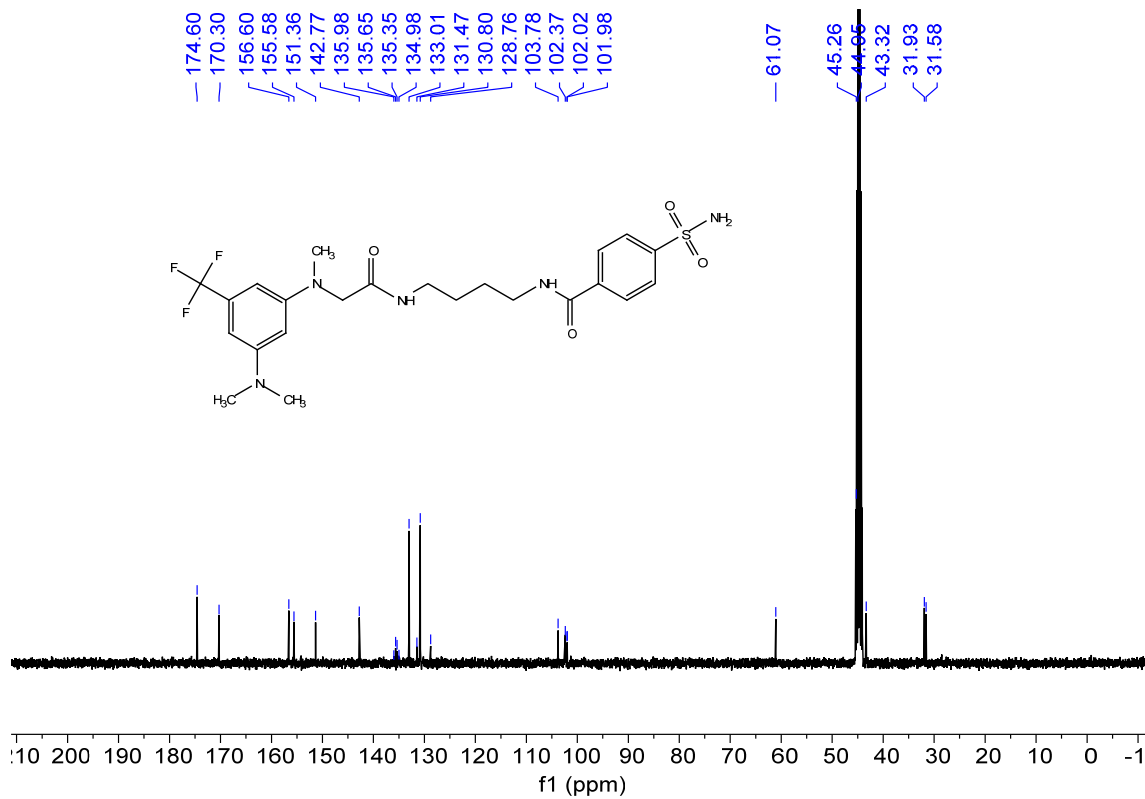

<sup>13</sup>C NMR spectrum of 10b

$^{19}\text{F}$  NMR (376 MHz,  $\text{CDCl}_3$ )

-56.51

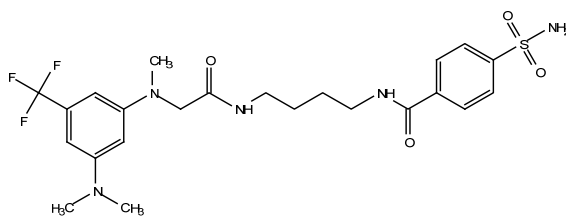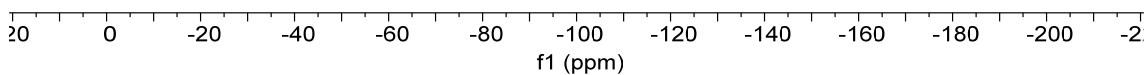

$^{19}\text{F}$  NMR spectrum of **10b**

$^1\text{H}$  NMR (400 MHz,  $\text{DMSO}-d_6$ )

-2.50

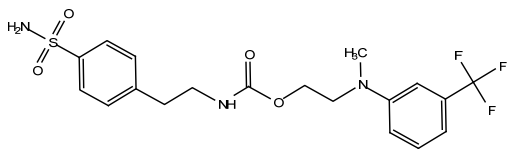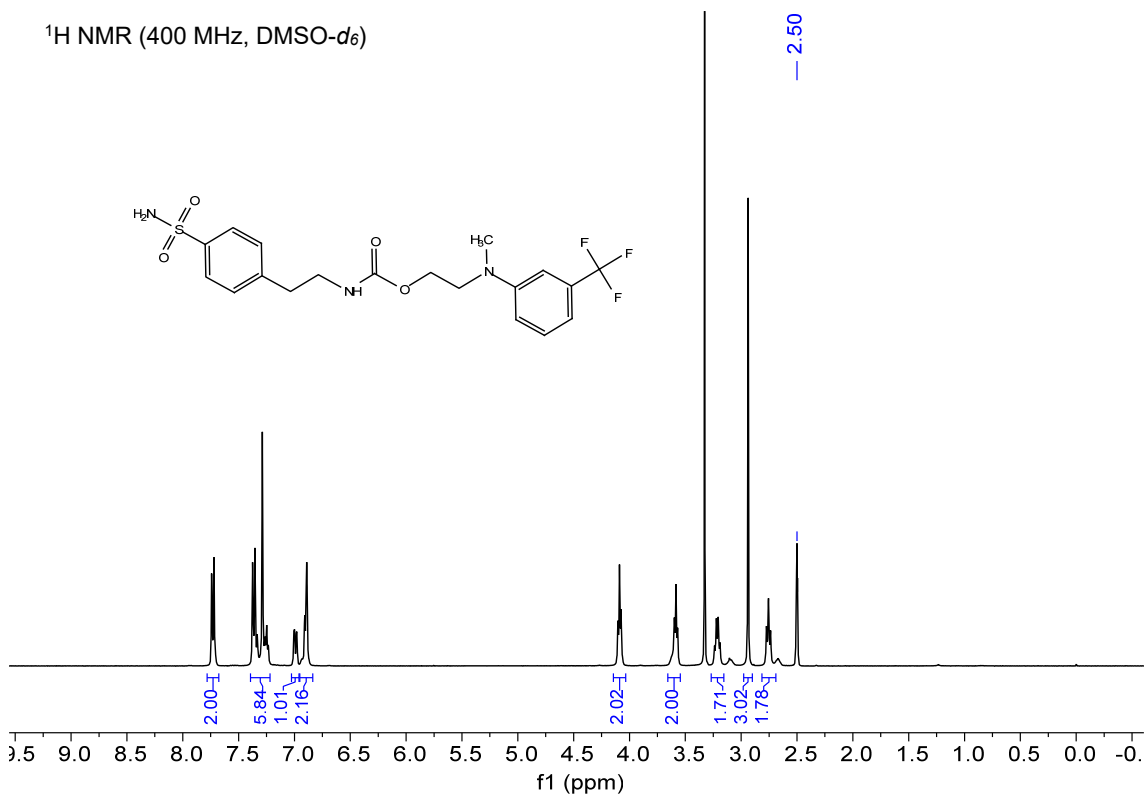

$^1\text{H}$  NMR spectrum of **10c**

$^{13}\text{C}$  NMR (101 MHz,  $\text{DMSO-}d_6$ )

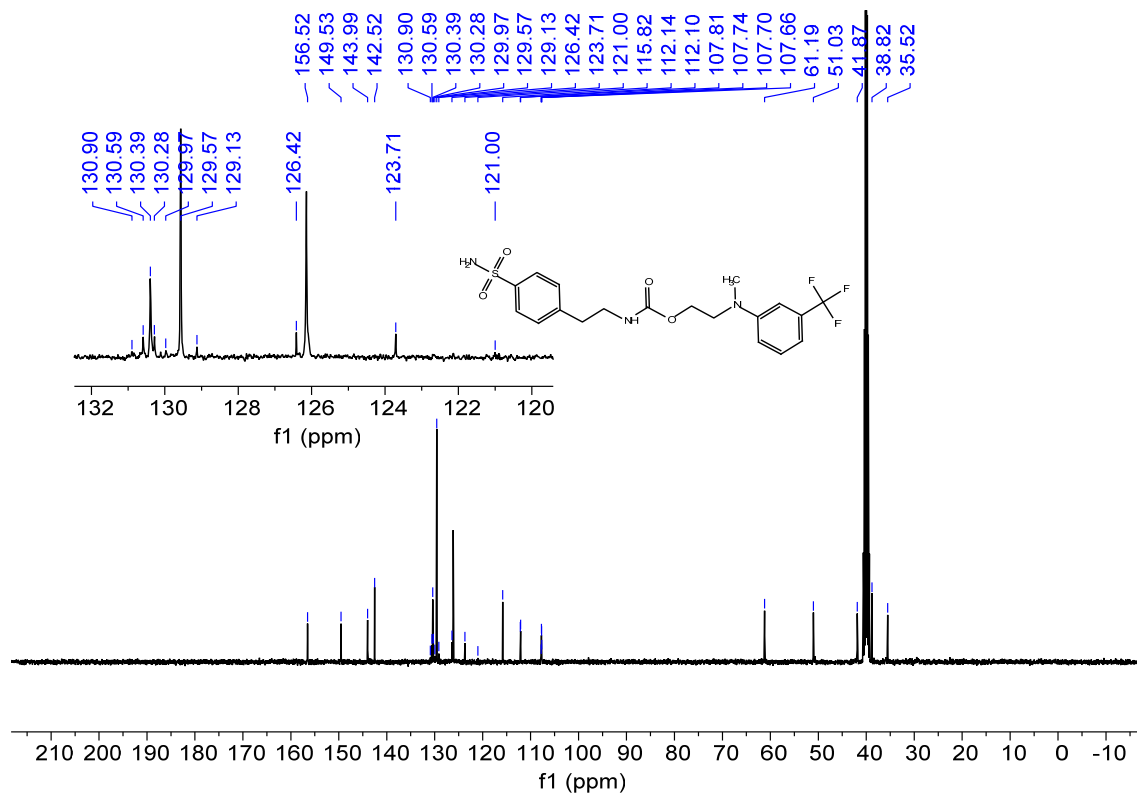

$^{13}\text{C}$  NMR spectrum of **10c**

$^{19}\text{F}$  NMR (376 MHz,  $\text{DMSO-}d_6$ )

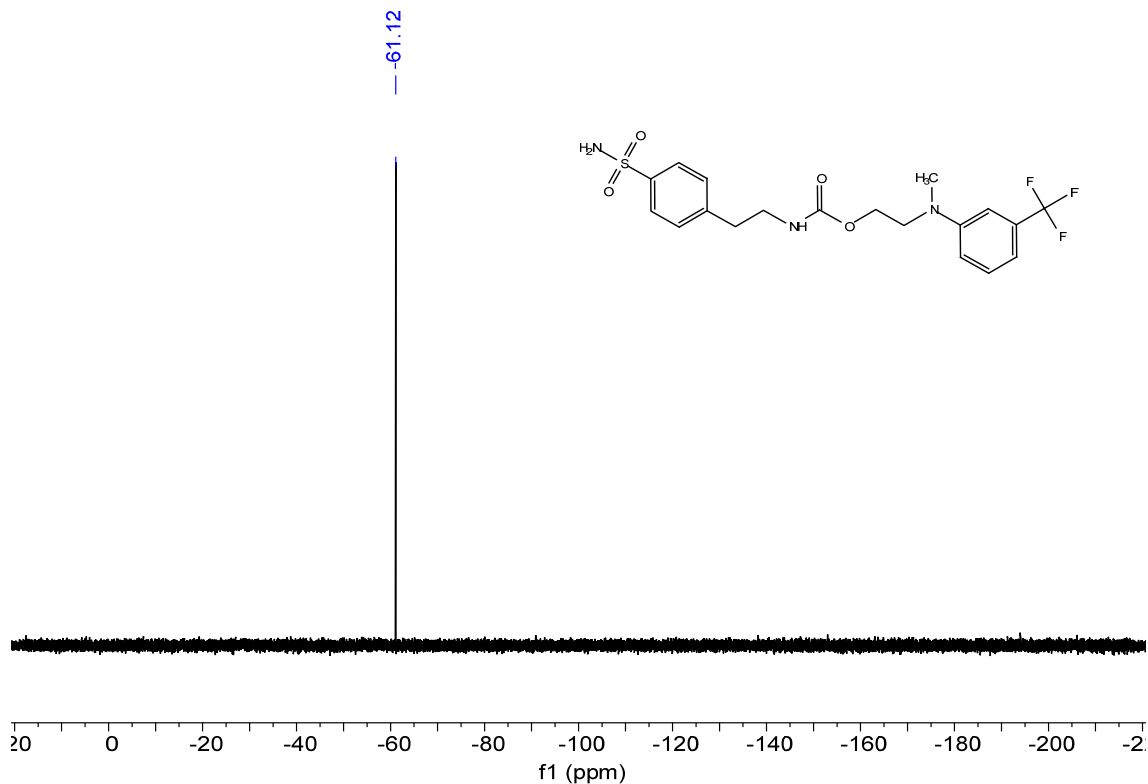

$^{19}\text{F}$  NMR spectrum of **10c**



<sup>1</sup>H NMR (400 MHz, DMSO-*d*<sub>6</sub>)

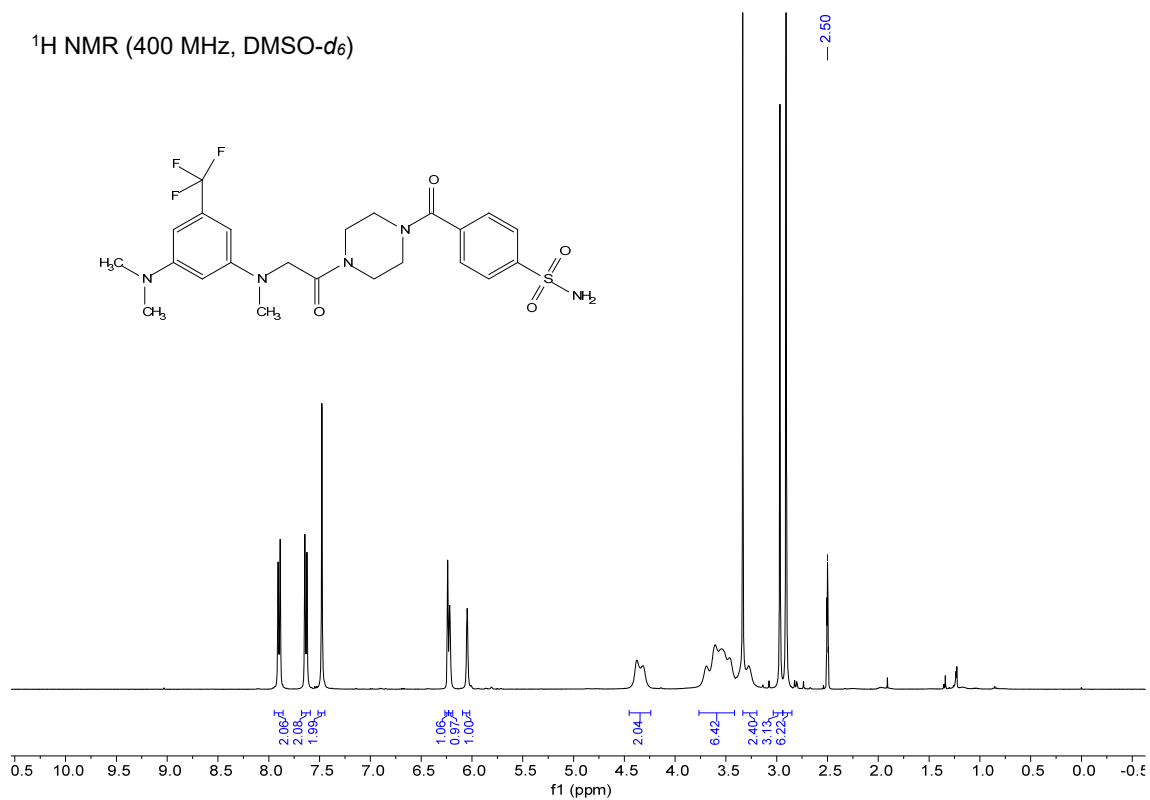

<sup>1</sup>H NMR spectrum of 10d

<sup>13</sup>C NMR (101 MHz, DMSO-*d*<sub>6</sub>)

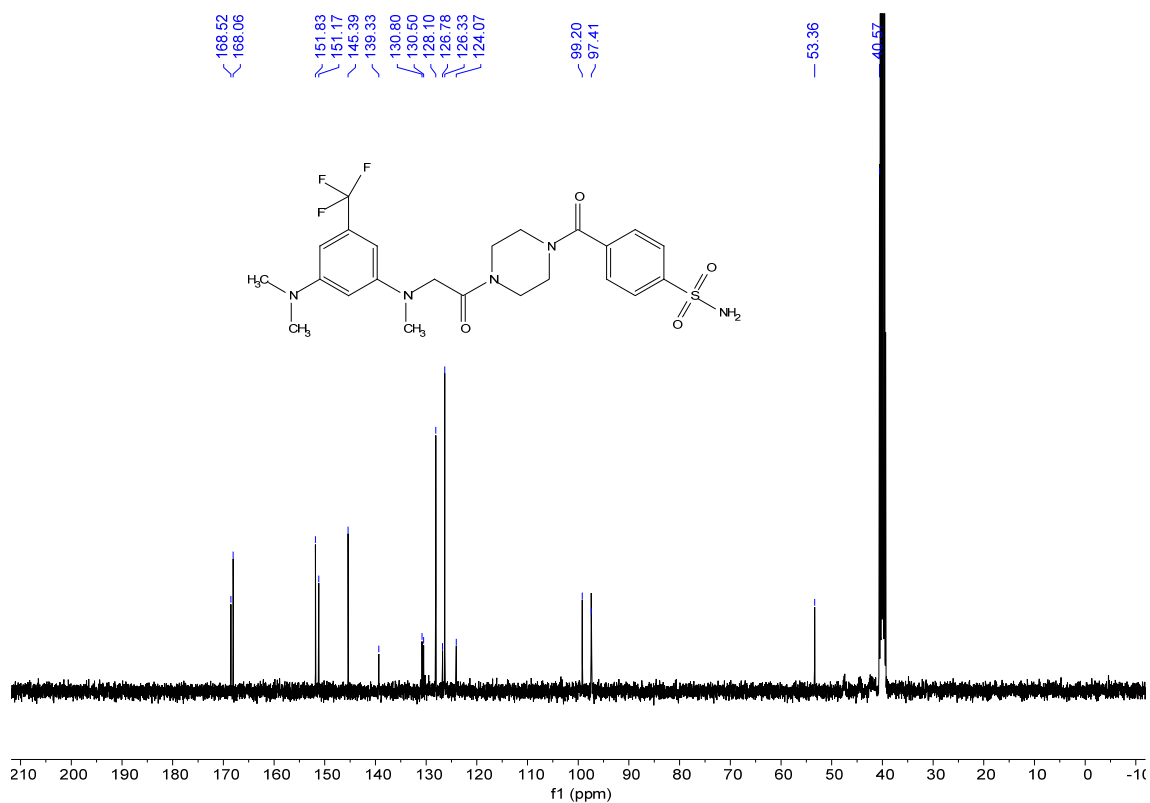

<sup>13</sup>C NMR spectrum of 10d

$^{19}\text{F}$  NMR (376 MHz,  $\text{CDCl}_3$ )

— -56.37

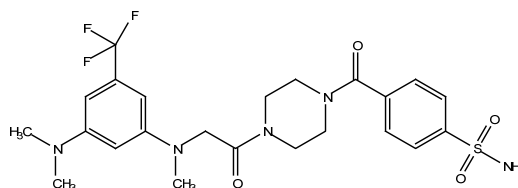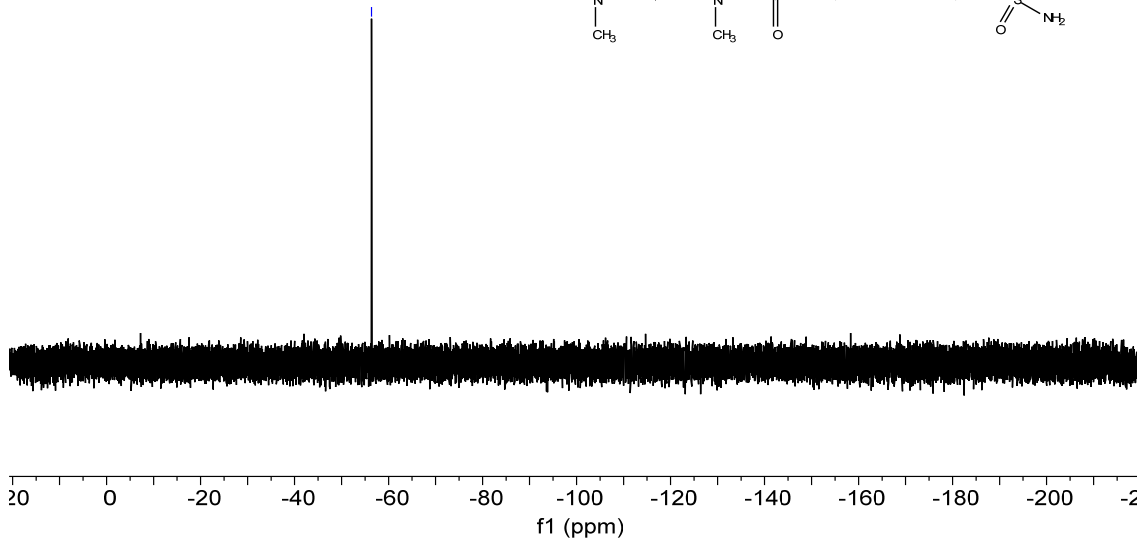

$^{19}\text{F}$  NMR spectrum of **10d**

$^1\text{H}$  NMR (400 MHz,  $\text{DMSO}-d_6$ )

— 2.50

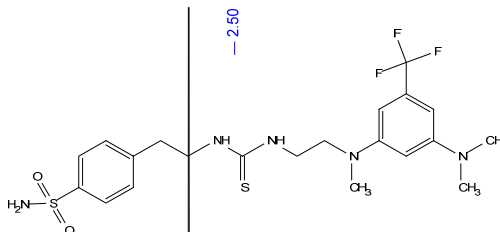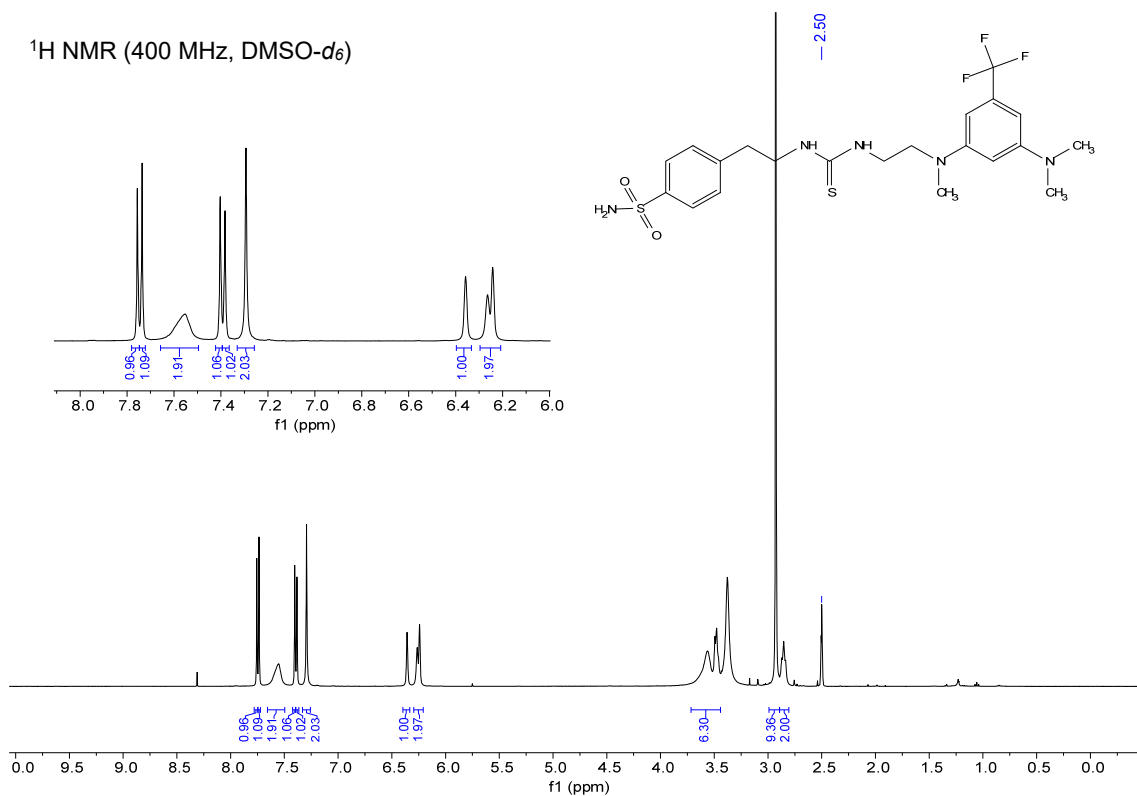

$^1\text{H}$  NMR spectrum of **10e**

<sup>13</sup>C NMR (101 MHz, DMSO-*d*<sub>6</sub>)

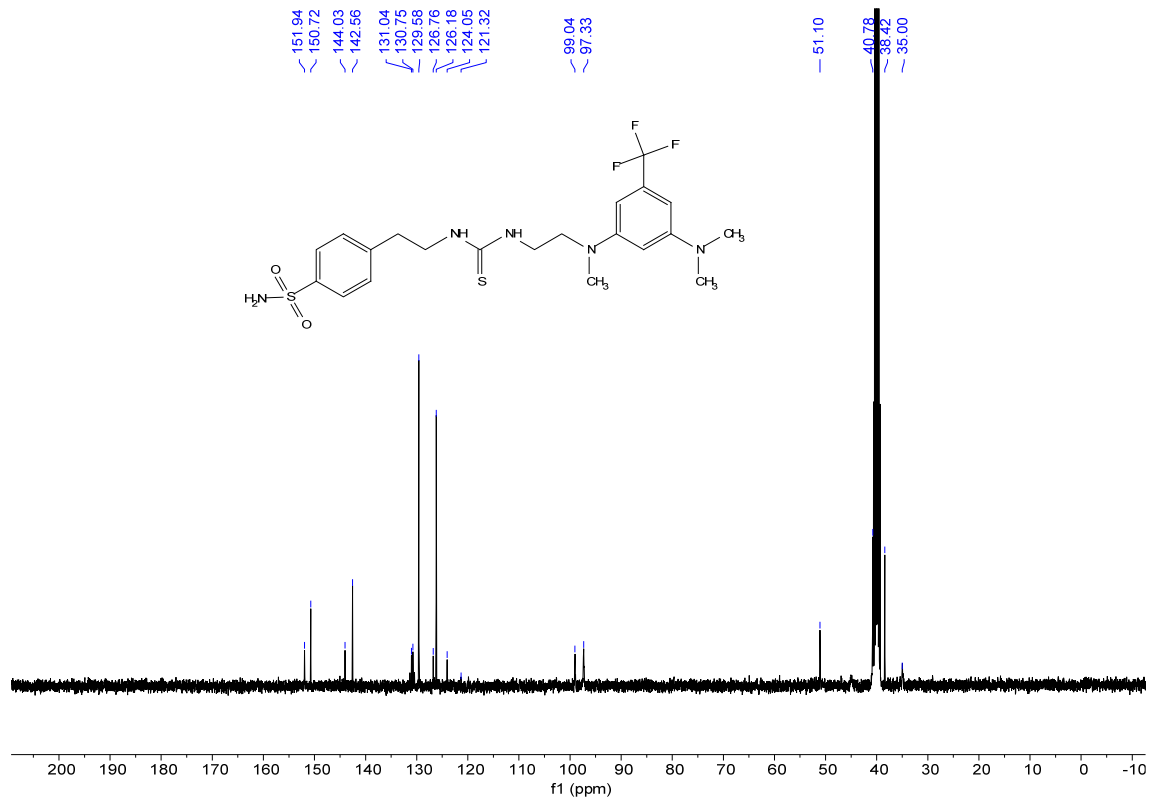

<sup>13</sup>C NMR spectrum of 10e

<sup>19</sup>F NMR (376 MHz, DMSO-*d*<sub>6</sub>)

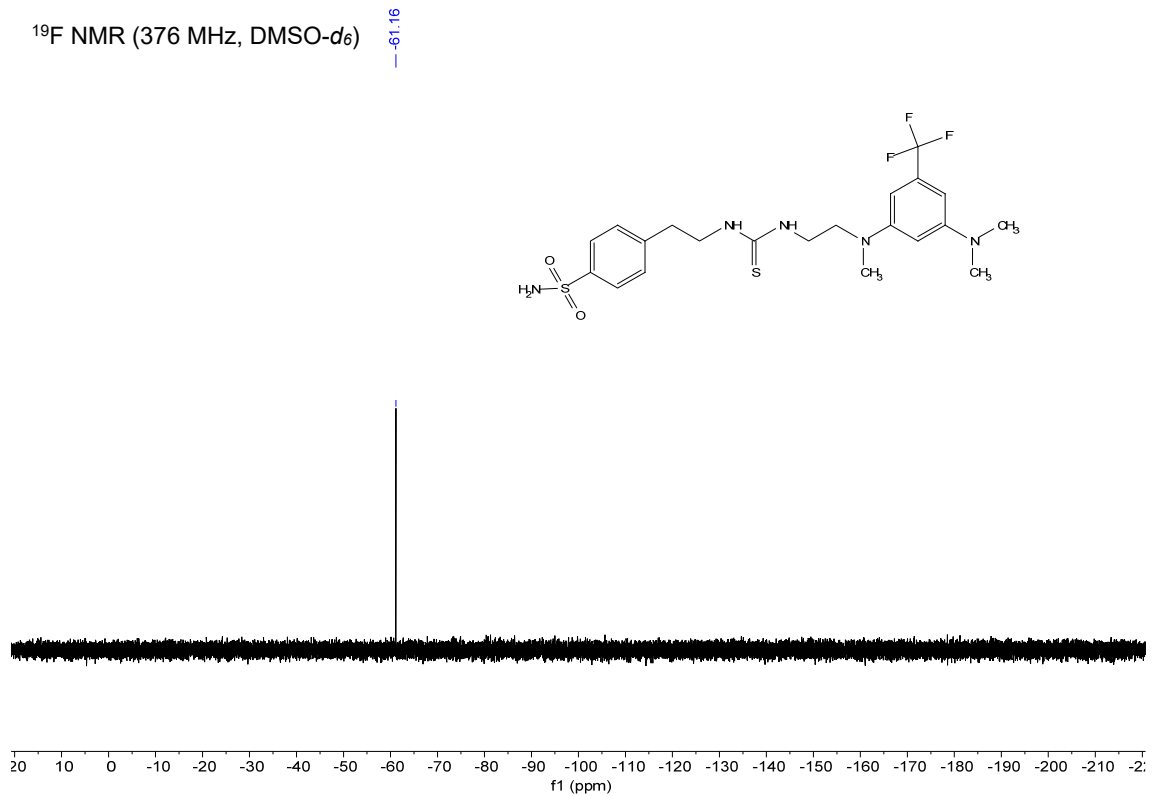

<sup>19</sup>F NMR spectrum of 10e

$^1\text{H}$  NMR (400 MHz,  $\text{CDCl}_3$ )

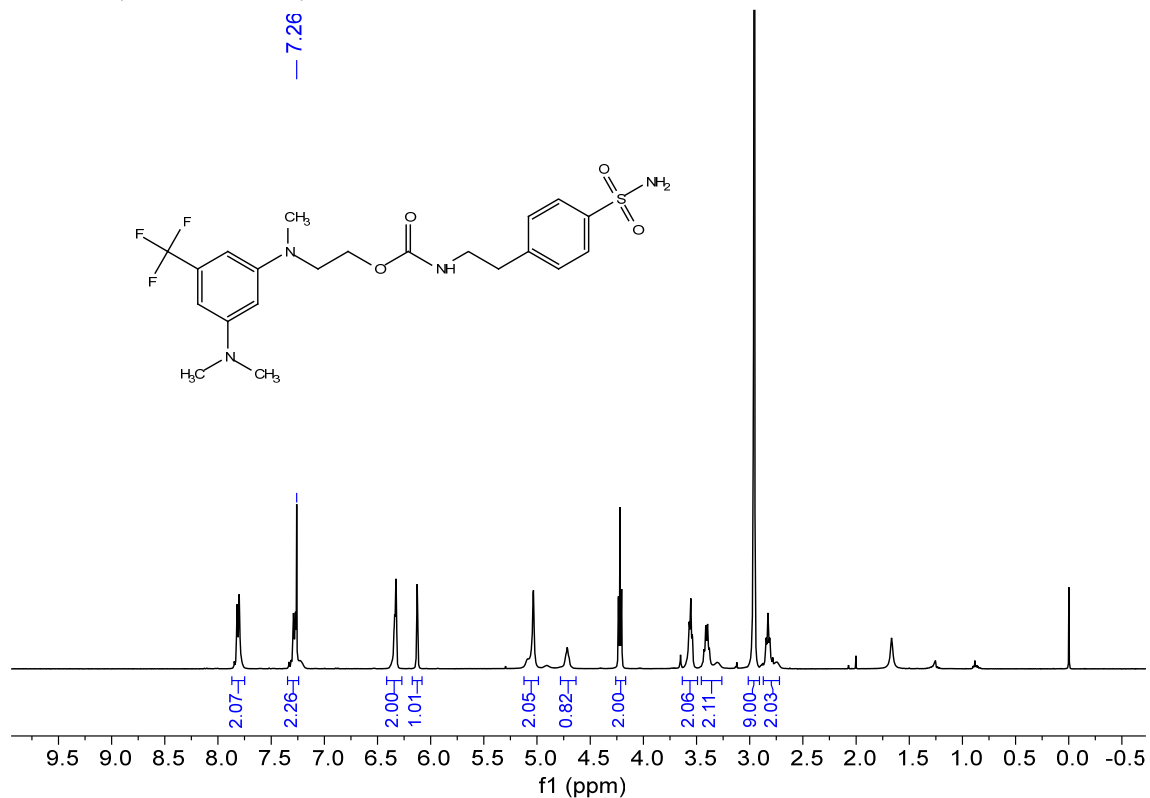

$^1\text{H}$  NMR spectrum of **10f**

$^{13}\text{C}$  NMR (101 MHz,  $\text{CDCl}_3$ )

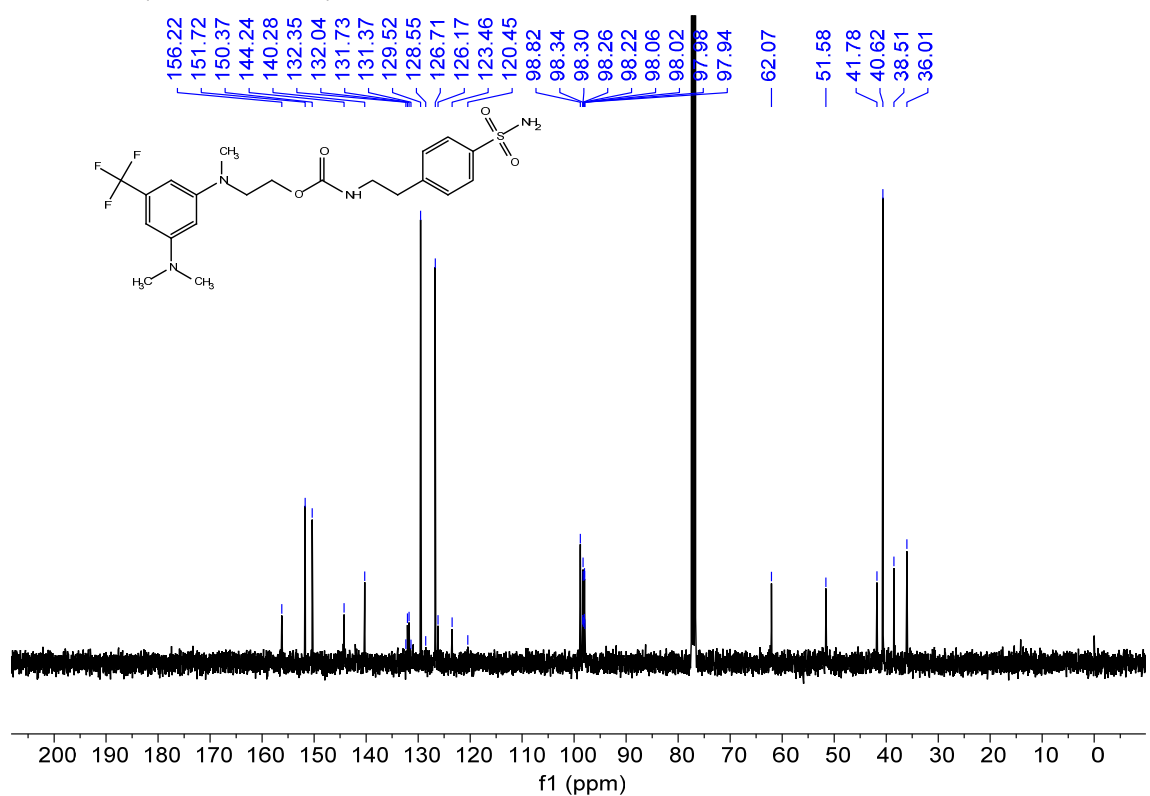

$^{13}\text{C}$  NMR spectrum of **10f**



$^{19}\text{H}$  NMR (400 MHz,  $\text{CDCl}_3$ )

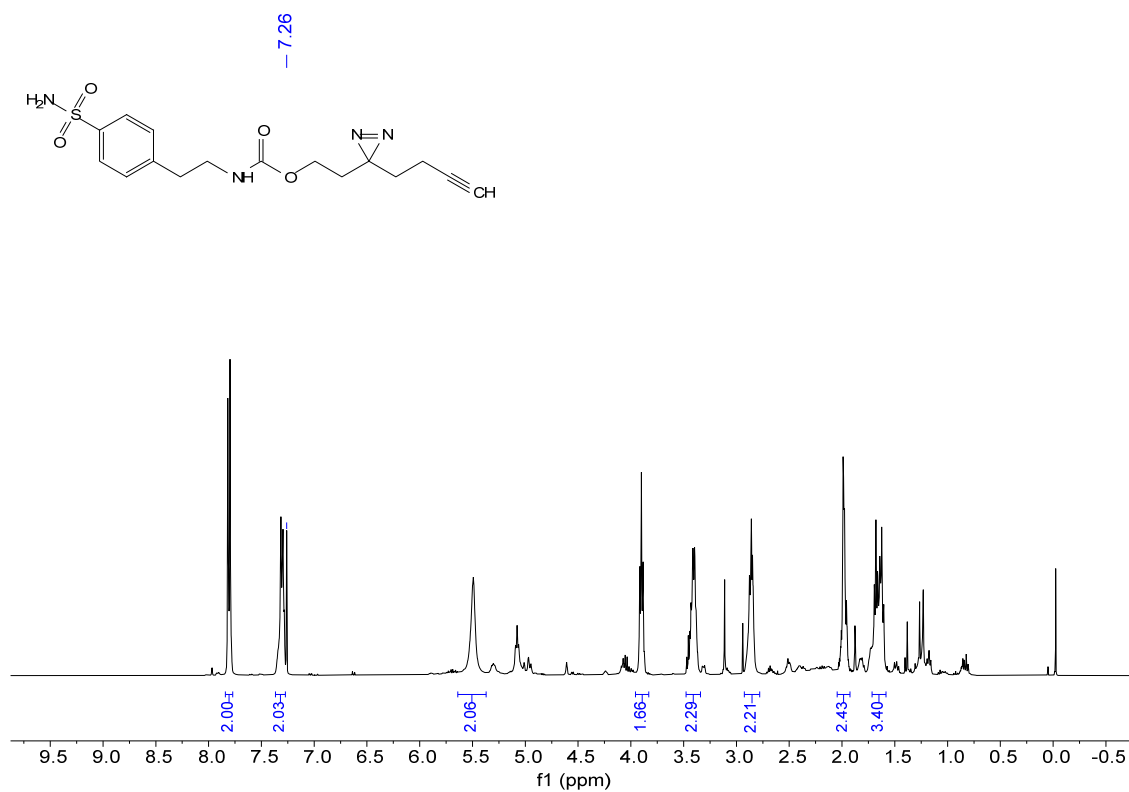

$^{19}\text{H}$  NMR spectrum of **10h**

$^{13}\text{C}$  NMR (101 MHz,  $\text{CDCl}_3$ )

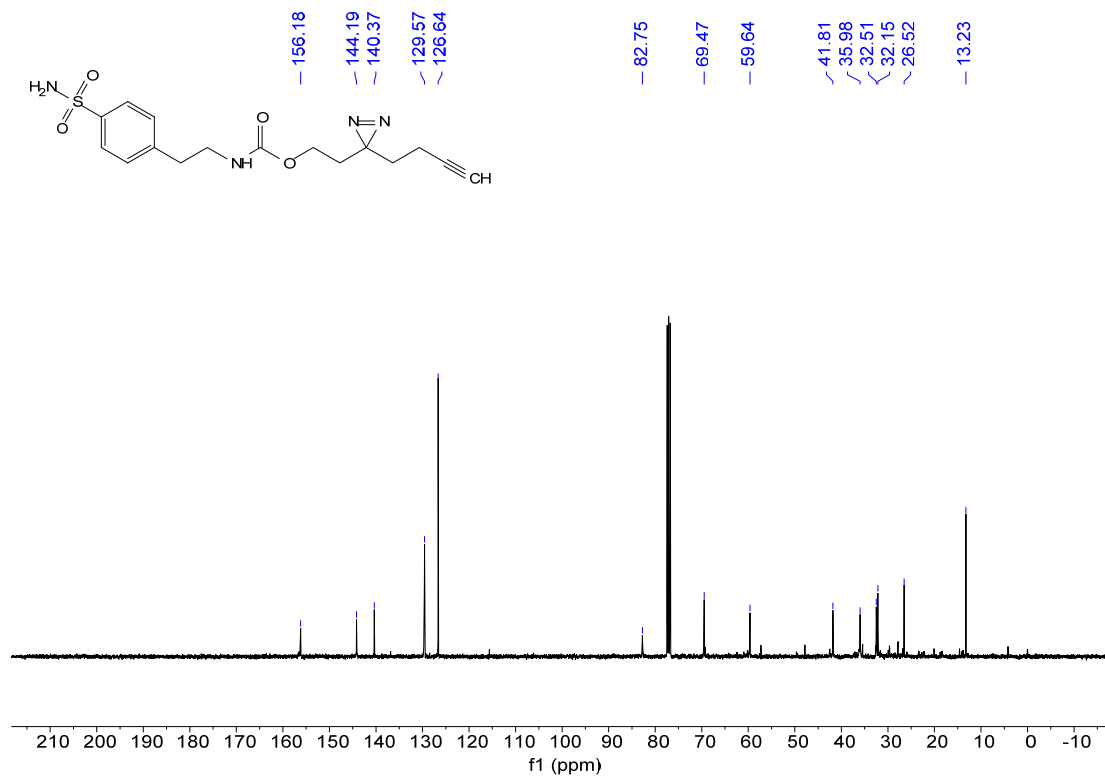

$^{13}\text{C}$  NMR spectrum of **10h**

<sup>1</sup>H NMR (400 MHz, CDCl<sub>3</sub>)

- 2.50

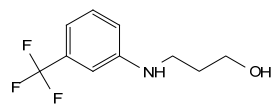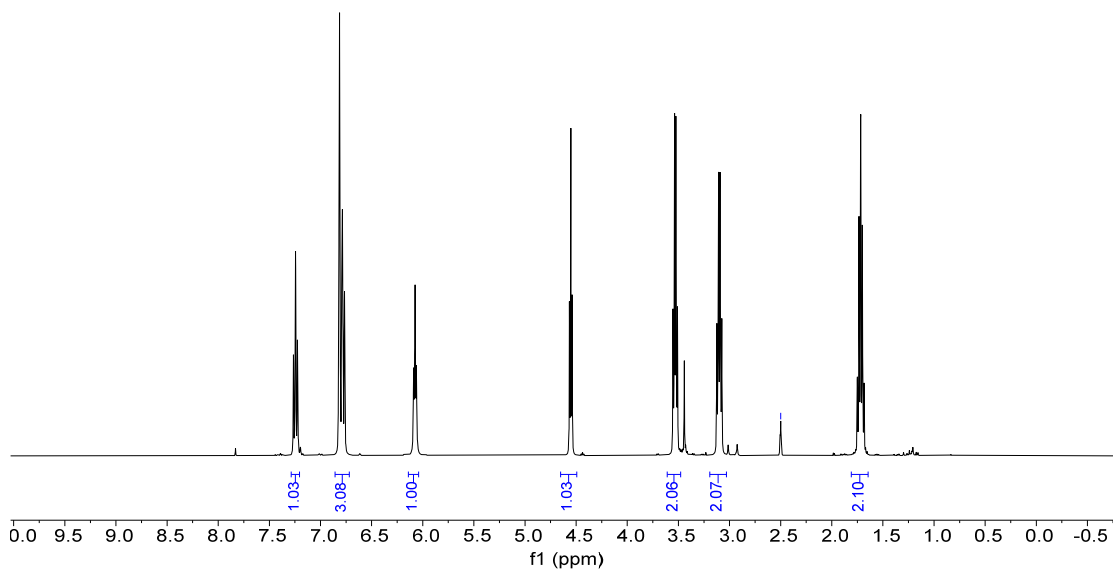

<sup>1</sup>H NMR spectrum of **10i**

<sup>13</sup>C NMR (101 MHz, CDCl<sub>3</sub>)

149.93  
130.77  
130.47  
130.16  
129.85  
129.12  
126.42  
123.71  
121.01  
115.58  
111.59  
111.55  
111.51  
111.47  
108.04  
108.00  
107.96  
107.92  
58.97  
40.04  
32.18

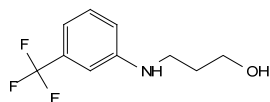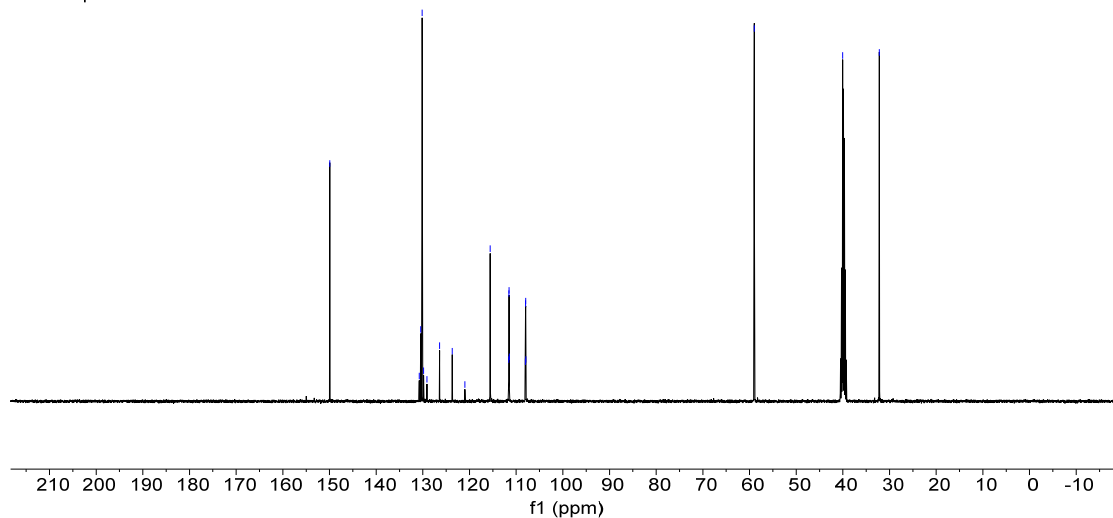

<sup>13</sup>C NMR spectrum of **10i**

<sup>19</sup>F NMR (376 MHz, CDCl<sub>3</sub>)

-61.53

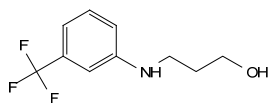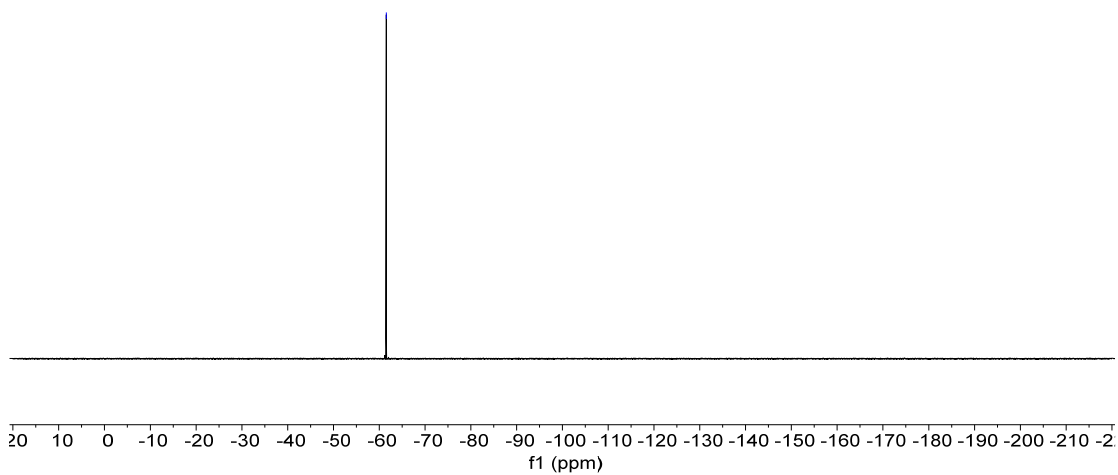

<sup>19</sup>F NMR spectrum of **10i**

<sup>1</sup>H NMR (400 MHz, CDCl<sub>3</sub>)

-2.50

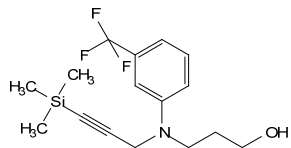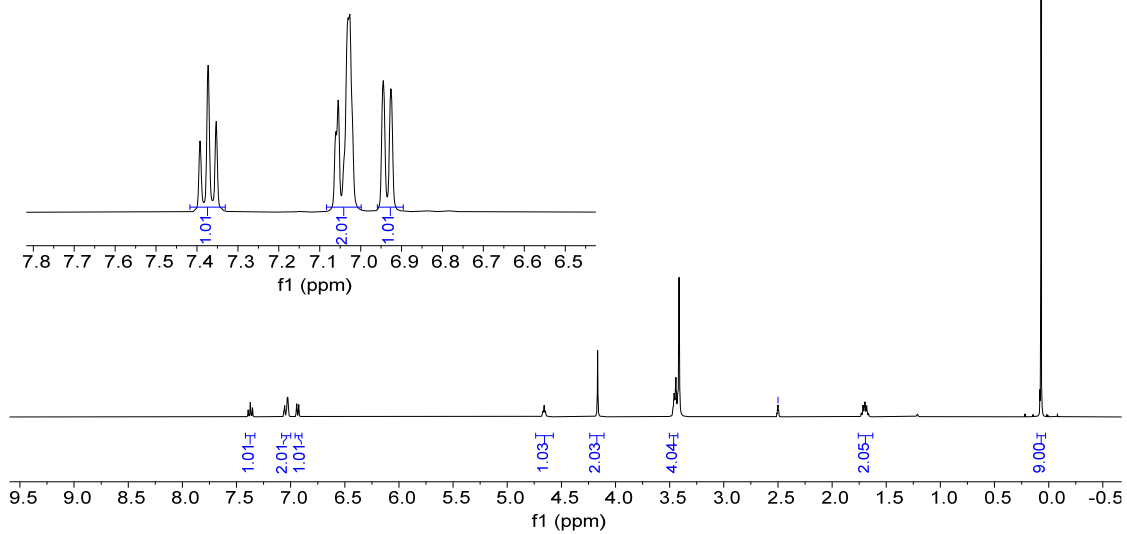

<sup>1</sup>H NMR spectrum of **10j**



<sup>13</sup>C NMR (101 MHz, CDCl<sub>3</sub>)

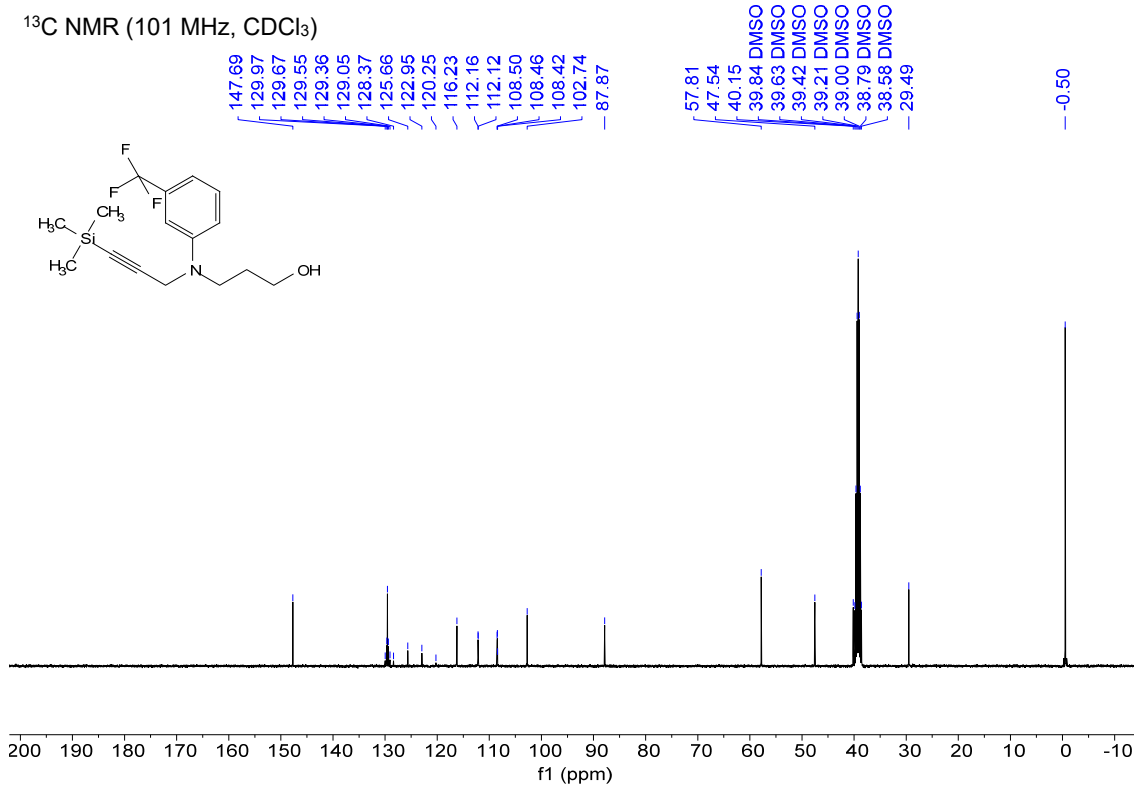

<sup>13</sup>C NMR spectrum of **10j**

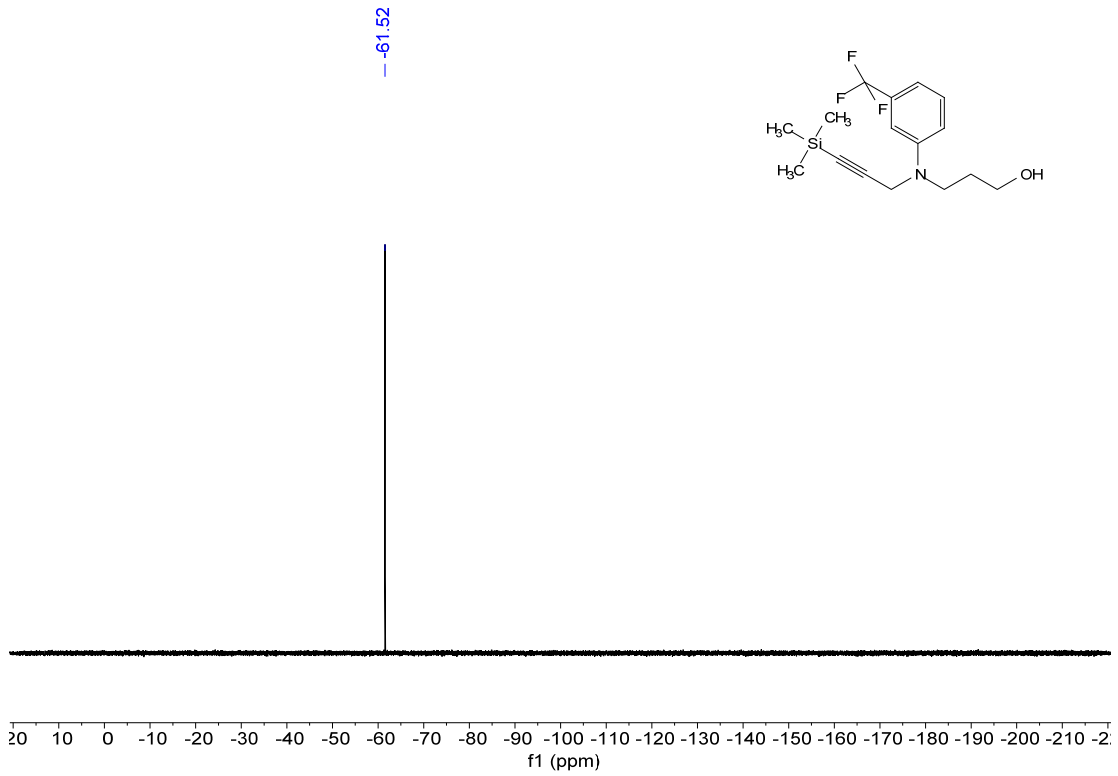

<sup>19</sup>F NMR spectrum of **10j**

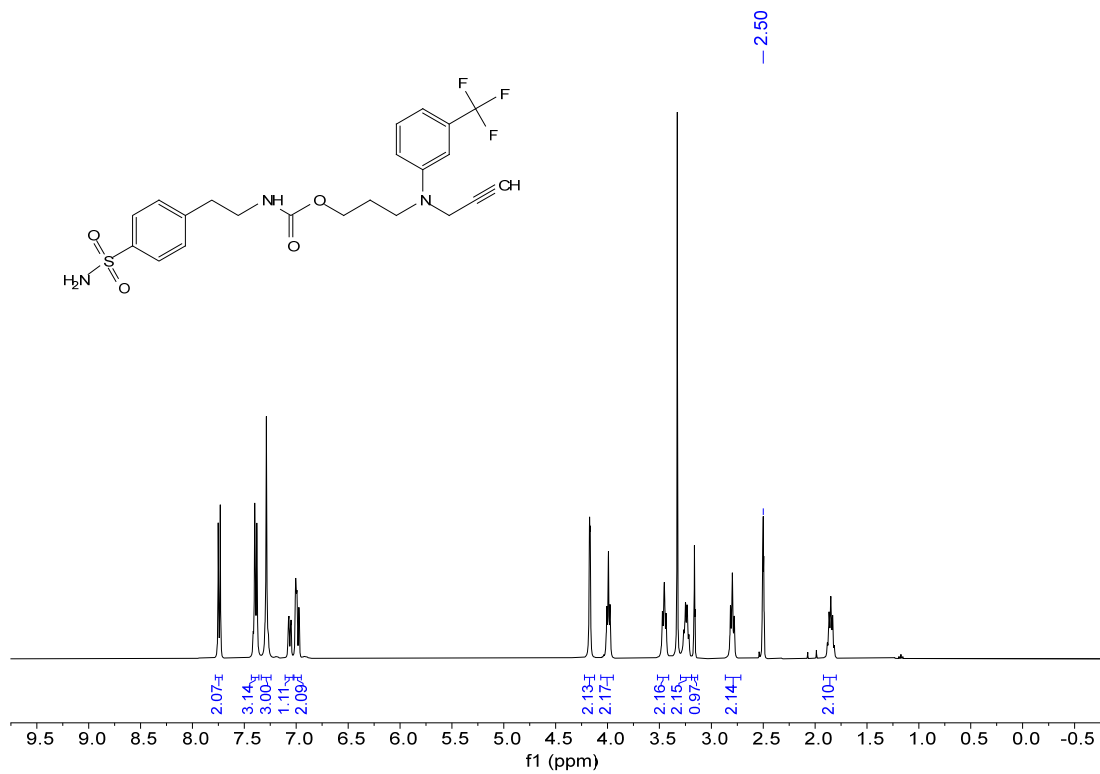

<sup>1</sup>H NMR spectrum of 10k

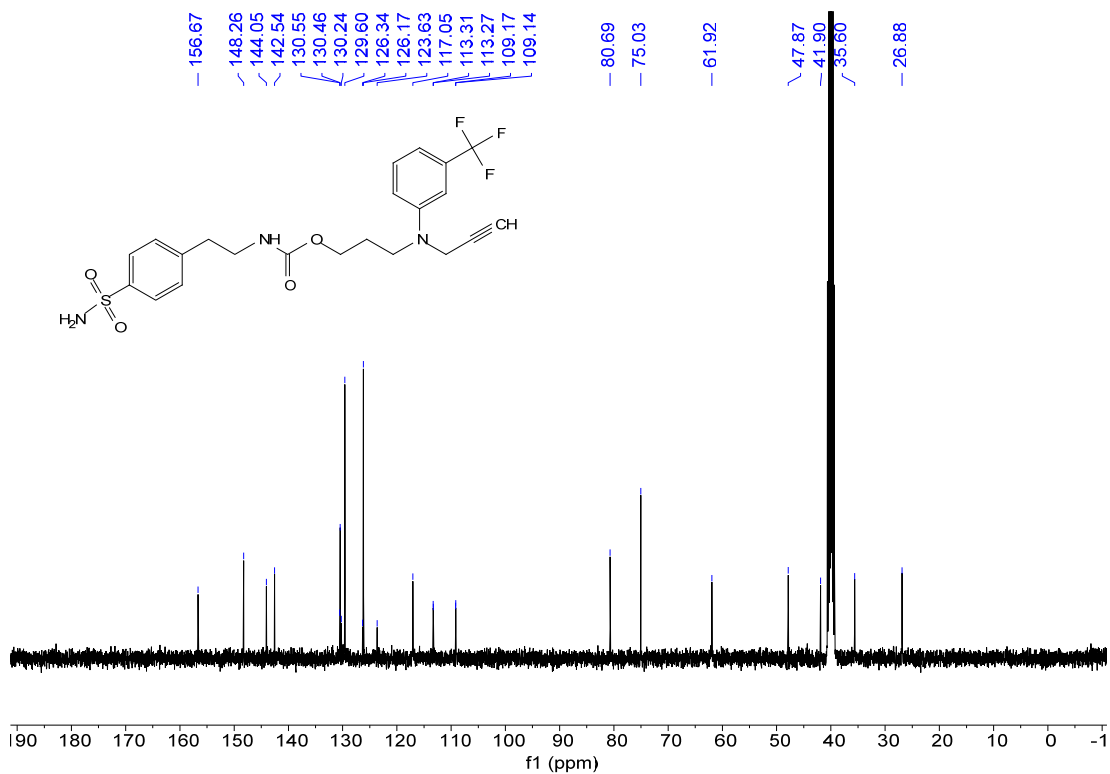

<sup>13</sup>C NMR spectrum of 10k

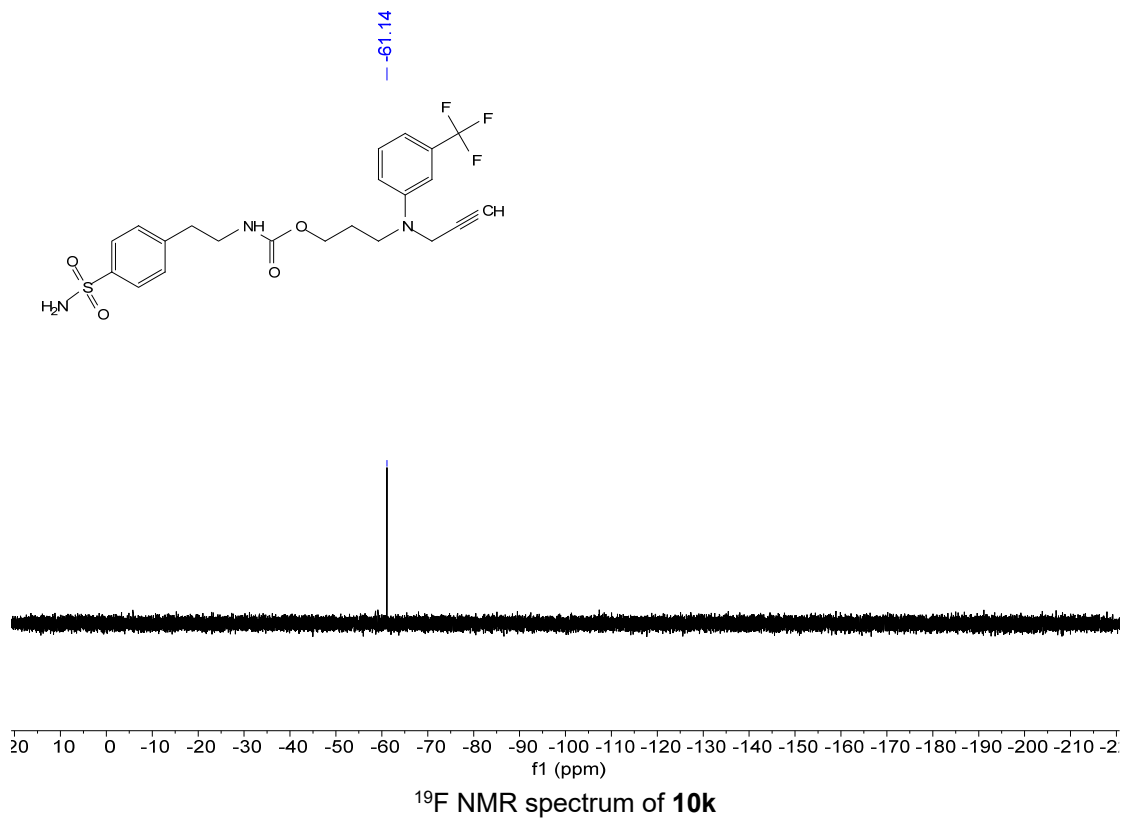

Supplement: d2sc04636a1.pdf [file d2sc04636a1.pdf]
